# Supplementary material
Source: publisher figshare collection journal article supplement (https://gsajournals.figshare.com/ndownloader/files/26579615)
Supplement: Supplementary file 1 [file 26579615]

>1.circularised_pilon
ATGATTGTTAAATTTCATGCCAGGGGAAAAGGCGGTGGCAGTGGTCCGGTTGATTACCTGCTGGGAAGGGAGCGAAACCG
GGAAGGGGCAACGGTGCTTCAGGGTAATCCGGAAGAAGTCCGGGAACTCATCGATGCCACGCCATTTGCGAAGAAATACA
CGTCAGGTGTTCTGTCGTTCGCGGAGAAGGAGCTGCCGCCGGGAGGACGTGAAAAGGTGATGGCGAGCTTTGAGCGTGTA
CTGATGCCCGGTCTCGAAAAGAATCAGTACAGCATCCTGTGGGTGGAGCACCAGGACAAGGGACGGCTTGAGCTGAATTT
TGTCATTCCGAACATGGAGCTACAGACCGGAAAACGCCTCCAGCCGTACTACGACCGGGCAGACAGGCCGAGAATTGATG
CCTGGCAGACGCTGGTGAATCACCATTACGGGCTGCATGACCCCAACGCCCCGGAGAACCGCCGGATACTGACTCTCCCT
GATAACCTGCCGGAAACGAAACAGGCGCTTGCAGAGAGCGTCACACGCGGGATAGACGCTCTTTATCATGTCGGGGAGAT
AAAAGGCCGTCAGGATGTGATTCAGGCGCTCACAGAGGCAGGGCTTGAAGTGGTCAGGGTGACGCGAAGCAGTATCAGCA
TTGCAGACCCGAACGGTGGGAAGAATATCAGGCTGAAAGGAGCATTCTATGAGCAATCTTTTACAGACGGGCGCGGAGTT
CGAGAAAAAGCTGAAAGAGAGAGCCGAATCTACAGAGACAATGCTGAACGACGAGTTCAGCAAGCTCGAAAAATCTGTAA
GCAAGGCTGTGACATCAAACGAGACGAAAATCAAAGACGCTATAGCCCTGTTCACAGCTTCGACAGAGGAATCACTGAAA
AAACACCGGGAAGGGGTGAAAGAGGCGATGATGCAGCACAGGAAGGACGTGTTAAAGCTGGCAGGGAATACGGGCATGAT
GTTACTGGGGATGGTCATTTTCCTGTTTACCGTGAGTGGCGGGACGCTCTGGTATCTTGGCGGGCGGATACAGGCGAACC
TGGAAGAAATCAGGATACAGGAAGAAACATTGCAGAAACTGAACGCGAAGACATGGGGCGTGGAGTTTGTGCAGGACGGG
AGAAGGAAATTTCTGGTCATCCCGCAGGGGAAATCGGCAACGGTGATTCCCTATCAGGGGAAGGACTGGGTACAACTGAC
GGAGTGACACAGAGTGACGGAGCTGGAAAGACATTTGCTGAACGCATTAGAGCAACTGCAACAGGACTATATGCAGCGGC
TGAGCGAATGGGAGAGCGCCTTCGTGGAATTGCAGAAGATGTTTTCGCTTACGCAACGGGACAACGCGATGCTGAACGAG
CAGGTCATGCAGTTGAGTCAGCAGGTGCAGCACTTGAGCGAGCGGACAGAACGCTTGAGCCAGTTATACAGCGAGAACAG
GAGATAAGGGACGAACGGCTGATACAGGAGCGCGAACATGCGTTATCCCTGGAGCGTGAGCGCCAGCCGGAAATACAGGA
ACGCACACTGGATGGCCCTTCGCTGGGATGGTAATCAGAGACAGGCTAAAATGTTGTCAGCGCGTTTCCGGTGCATTTTT
TGGGATAATGGTTGGTTCGGGGGTTCCGGGAACGCGCTTCTGTCAGACCTTGCTGAAAACACAGGAACGCGTTAAAACGC
ATACGGGCGCGATTCTGGTGTATCTTTTGTTGCTGTGTTTTGCCTCTATTGCCAGATCGCGCTCATTCCCCTGAACTTCT
GTTTTTCCGCTCCGGTTCCGTCTTCTGCCTTTCCGAAAGTATGAAAAAATCCGTTTCAGCAGTCTCTGGCTGGCAATTCC
TGCGTGATTCACATGGCTGCATAGCTATGCATGTGGTTAAAATTTATCGGGTGCGATCGCGGCAGTTTTTCGGGTGGTTT
GTTGCCATTTTTACCAGTCTGCTGCCGTGATCGCACCGAACGCGTTTCAGTGGTGCGTACAATAGAGATGTTATGGTAAA
TATTACAGGTGTGATGGTATGAAAAAGCCGCCCCTGTGGGCGGCTTTTTTAGTAACCAAGACGTTTCAACTCAGCCGACA
GACGTTTTAAGCTCTCATCGAGGTATTCCTGGTTTTCTTTTAGTTCTTTTTTCATGAGCTCAGTGTGATGAGCGAGTTCT
TGGTTGTCTGAAGAACGACTGACCGGGAAATCATCACTAGATGATAACCGCCCATTTTTGCTGTAATCCATCGTTATGCA
GATCAGAGTAGCAAGGTCTATTACGCGGTGAAGTGGAAGCTCCTCAGACTGCCGAGACCACTTTTCGCCGGTATTTCGCC
AAACCTTTGCCGAAAGCTCTGTCCATCCTGGAGTGTTCCATTGAGCAATACCAACGGATAGTCCCATGGCATCTGTATCT
TCTGCATATGGACCATCTATGCGGTCATAGTTTTCAACTTGAATTACAGGCTTATGTTTTAAATGAGTTGGTATTTTCAT
TGATAGAACCGATTGTTGTTTTTTTGTTATTAACAAAATAACAAAATTTATTGATTAGTAAATTTACTAAATGTAAGTAA
ATATTATTTTGATTATATATATTTGATTTTTAATGCATTATTTATAGTGCATCTGGTTTTTAATTTACCGCTGCGTTGAC
AGCTTTGTCTCGTTTCTTTAAAACATTTAAAATATTTTAAATGTTTGATGGGGCTGTTTATGGATCAGCGAGAAAAGGCC
AAATTGTTGGCTTATGTATTAAAAACCGAGTGGAACGCAAAGCAAAAACACATCGCTTTAGTACTACAGGTATCAGAAGG
AACTATCTCTTTGTGGGTGAAAGAGATGTCTTTAAAACATCAGATTTATAAACTTAGTCAAGAATTACAAGAGGTTAGGG
CTTTAGCTCAGGGGCTGGTAAGTTCTGGGCAGATTGAGCAAAACCCTGGTTTTTTACCTAGTTTCTAAATAAATGGATGC
TACATGGCTATAACCTTTCACCCTAAAAAAGCAGATCTTGATATGTGATTTTAAAGGTTCGGTATCTCCAGAAATTAACC
AATGCCGACCAGTGTTGATTTTAAGAGAAGAGATTGTTGGCAGTCAGAAGCTCGTTGTTGTTGTTCCTATTAGCAATACT
GAACCTAATCCCCTTTGCAGCTTTCATCATGAGTTAGATGATGCTTCACTTAGCGGCCACATGATGGGGAAAAAGCATTG
GGCTAAATGTGATCTGGTATCAACAGTGTCTGTTGACCGTTTAGATCGAATTAGAAGCCGGGATCCGAGAACGGGTAAAA
ATTACTTTCATGTAGGAGTCATGACTGATGATGACTTTGACGCAGTAAGAGATAAAGTCATGTACGGTATCGGATTTGAT
GACTTTTTGGATGTAAAAAATGAAGGTGTTCCTGATGGGGCAGCAGCTTCAGTGGTAATTGCTGCCGAAGTGAACGTTGC
TGAAGTAGAAAAACAAAAAAAAGCCATCTGATTTTCATCAAATGGCTTTTTTTGACCCAAGCCGTTTTCACGGAGTCATA
GTCTAAAAGTTGGTCAATCTTTTACAACTAGCCGCATAAAGCGGACTTACAAGCCCCTAAGGGAACACTAGTAATTATAG
TGTCGATATTTTAATTATCAATAGTTATAAGATCGAGCATCTGCTTCTTCTTGAGATCATTAGGGGTTGGAGGTAATCTC
CTGTCCTGTAAACGAAAAAACCACCTGGGGAGGTGGTTTTTTCGAGGGGTCAGTAAGTTGGGGAACTTCTGAACCGTGGT
AACAGGGTGTACAAGACCGCTGCCACCAAAATCGTCCTTCCAGTTTAGCTGTAGTTTGGCTCAGACTTCAAGAACTCTGC
ATCAGTAATCTCTTGTACACCCTCTTACCAATGGCTGCTGCCAGTGGCGTTTTGTCGTGTCTTTCCGGGTTGGACTCAAG
ACGATAGTTACCGGATAAGGCGCAGCGGTCGGGCTGAACGGGGGTTCGTGCACACAGCCCAGCTTGGAGCGAACGACCTA
CACCGAGCCGAGATACCTACAGCGTGAGCTATGAGAAAGCGCCACGCTTCCCGAAGGGAGAAAGGCGGAGAGGTATCCGG
TAAGCGGCAGGGTCGGAACAGGAGAGCGCACGAGGGAGCTTCCAGGGGAAACGCCTGGTATCTTTATAGTCCTGTCGGGT
TTCGCCACCTCTGACTTGAGCGTCTGTTTTTGTGATGCTCGTCAGGGGGCGGAGCCTATGGAAAAACGCCATCGGCGTGG
CCTTTTTCCGGCTCTTGGTCTTTTGCTCACATGTTCTTTCCGGCCTTATCCCCTGATTCTGTGGATAACCGCATTACCGT
CTTTGAGTGAGCTGATACCGCTCGCCGCAGCCGAACGACCGAGCGTAGCGAGTCAGTGAGCGAGGAAGCGGAAGAGCGTC
GGAAGTTGCATTTTCTCCTTACACATCTGTGCGGCATTTCACACCCGGCATGGCGCACTTTTCATACAATCCGCACTGAT
GCCGCATGGTTAAGCCAGTATACACTCCGCTATCGCTACGTGACTGGGTCATGGCTGCGCCCCGACACCCGCAAGGTCAA
CGGCCTGACGCGCCCTGACGGGCTTGTCTGCTCCCGGCATCCGCTCACAGACAAGCTGTGACCGTCTCCGGGAGCTGTAT
GTGTCAGAGGTTTTCACCGTCATCCCCGAAGCGTGCGAGGCAGCTGCGGTAAAGCTCGTCGGCGTGGTCGTGAAGTGATT
CACAAATATCGGCCTGTTCATCTGCGTCCAGTTCGTTGAGCTTCTCCAGCAGCGTTAATGTCTGGCTTCTTATAAAGCGG
GCCATGTTAAGGGCGGTTTTTTCCTGTTTGGTCACTGATGCCTCCGTGTAAGGGGGATTTCTGTTCATGGGGTAATGATA
CCGATGAAACGCGAGAGGATGCTCACAATACGGGTTACTGATGATGAACATGCCCGGTTACTTGAACGCTGTGAGGGTAA
ACAACTGGCGGTATGGATGCGGCGGGTCTGCCTGGGGGAGCCGGTTGCCCGTTCCGGGAAACTGCCGACACTGGCACTGC
CGTTACTGCGTCAGCTGGCCGCCATCGGGAATAACCTGAATCAGACAGCGAGGAAGGTGAACAGCGGGCAGTGGTCTTCC
GGTGATCGGGTTCAGGTGTTGGCTGCGCTGATGGCCATCGGGGAGGAGCTGCGTCGGCTGCGTCTGGCCGTCAGGGAACA
GGGCGCGCGGGATGATTGTTAAATTTCATGCCAGGGGAAAAGGCGGTGGCAGTGGTCCGGTTGATTACCTGCTGGGAAGG
GAGCGAAACCGGGAAGGGGCAACGGTGCTTCAGGGTAATCCGGAAGAAGTCCGGGAACTCATCGATGCCACGCCATTTGC
GAAGAAATACACGTCAGGTGTTCTGTCGTTCGCGGAGAAGGAGCTGCCGCCGGGAGGACGTGAAAAGGTGATGGCGAGCT
TTGAGCGTGTACTGATGCCCGGTCTCGAAAAGAATCAGTACAGCATCCTGTGGGTGGAGCACCAGGACAAGGGACGGCTT
GAGCTGAATTTTGTCATTCCGAACATGGAGCTACAGACCGGAAAACGCCTCCAGCCGTACTACGACCGGGCAGACAGGCC
GAGAATTGATGCCTGGCAGACGCTGGTGAATCACCATTACGGGCTGCATGACCCCAACGCCCCGGAGAACCGCCGGATAC
TGACTCTCCCTGATAACCTGCCGGAAACGAAACAGGCGCTTGCAGAGAGCGTCACACGCGGGATAGACGCTCTTTATCAT
GTCGGGGAGATAAAAGGCCGTCAGGATGTGATTCAGGCGCTCACAGAGGCAGGGCTTGAAGTGGTCAGGGTGACGCGAAG
CAGTATCAGCATTGCAGACCCGAACGGTGGGAAGAATATCAGGCTGAAAGGAGCATTCTATGAGCAATCTTTTACAGACG
GGCGCGGAGTTCGAGAAAAAGCTGAAAGAGAGAGCCGAATCTACAGAGACAATGCTGAACGACGAGTTCAGCAAGCTCGA
AAAATCTGTAAGCAAGGCTGTGACATCAAACGAGACGAAAATCAAAGACGCTATAGCCCTGTTCACAGCTTCGACAGAGG
AATCACTGAAAAAACACCGGGAAGGGGTGAAAGAGGCGATGATGCAGCACAGGAAGGACGTGTTAAAGCTGGCAGGGAAT
ACGGGCATGATGTTACTGGGGATGGTCATTTTCCTGTTTACCGTGAGTGGCGGGACGCTCTGGTATCTTGGCGGGCGGAT
ACAGGCGAACCTGGAAGAAATCAGGATACAGGAAGAAACATTGCAGAAACTGAACGCGAAGACATGGGGCGTGGAGTTTG
TGCAGGACGGGAGAAGGAAATTTCTGGTCATCCCGCAGGGGAAATCGGCAACGGTGATTCCCTATCAGGGGAAGGACTGG
GTACAACTGACGGAGTGACACAGAGTGACGGAGCTGGAAAGACATTTGCTGAACGCATTAGAGCAACTGCAACAGGACTA
TATGCAGCGGCTGAGCGAATGGGAGAGCGCCTTCGTGGAATTGCAGAAGATGTTTTCGCTTACGCAACGGGACAACGCGA
TGCTGAACGAGCAGGTCATGCAGTTGAGTCAGCAGGTGCAGCACTTGAGCGAGCGGACAGAACGCTTGAGCCAGTTATAC
AGCGAGAACAGGAGATAAGGGACGAACGGCTGATACAGGAGCGCGAACATGCGTTATCCCTGGAGCGTGAGCGCCAGCCG
GAAATACAGGAACGCACACTGGATGGCCCTTCGCTGGGATGGTAATCAGAGACAGGCTAAAATGTTGTCAGCGCGTTTCC
GGTGCATTTTTTGGGATAATGGTTGGTTCGGGGGTTCCGGGAACGCGCTTCTGTCAGACCTTGCTGAAAACACAGGAACG
CGTTAAAACGCATACGGGCGCGATTCTGGTGTATCTTTTGTTGCTGTGTTTTGCCTCTATTGCCAGATCGCGCTCATTCC
CCTGAACTTCTGTTTTTCCGCTCCGGTTCCGTCTTCTGCCTTTCCGAAAGTATGAAAAAATCCGTTTCAGCAGTCTCTGG
CTGGCAATTCCTGCGTGATTCACATGGCTGCATAGCTATGCATGTGGTTAAAATTTATCGGGTGCGATCGCGGCAGTTTT
TCGGGTGGTTTGTTGCCATTTTTACCAGTCTGCTGCCGTGATCGCACCGAACGCGTTTCAGTGGTGCGTACAATAGAGAT
GTTATGGTAAATATTACAGGTGTGATGGTATGAAAAAGCCGCCCCTGTGGGCGGCTTTTTTAGTAACCAAGACGTTTCAA
CTCAGCCGACAGACGTTTTAAGCTCTCATCGAGGTATTCCTGGTTTTCTTTTAGTTCTTTTTTCATGAGCTCAGTGTGAT
GAGCGAGTTCTTGGTTGTCTGAAGAACGACTGACCGGGAAATCATCACTAGATGATAACCGCCCATTTTTGCTGTAATCC
ATCGTTATGCAGATCAGAGTAGCAAGGTCTATTACGCGGTGAAGTGGAAGCTCCTCAGACTGCCGAGACCACTTTTCGCC
GGTATTTCGCCAAACCTTTGCCGAAAGCTCTGTCCATCCTGGAGTGTTCCATTGAGCAATACCAACGGATAGTCCCATGG
CATCTGTATCTTCTGCATATGGACCATCTATGCGGTCATAGTTTTCAACTTGAATTACAGGCTTATGTTTTAAATGAGTT
GGTATTTTCATTGATAGAACCGATTGTTGTTTTTTTGTTATTAACAAAATAACAAAATTTATTGATTAGTAAATTTACTA
AATGTAAGTAAATATTATTTTGATTATATATATTTGATTTTTAATGCATTATTTATAGTGCATCTGGTTTTTAATTTACC
GCTGCGTTGACAGCTTTGTCTCGTTTCTTTAAAACATTTAAAATATTTTAAATGTTTGATGGGGCTGTTTATGGATCAGC
GAGAAAAGGCCAAATTGTTGGCTTATGTATTAAAAACCGAGTGGAACGCAAAGCAAAAACACATCGCTTTAGTACTACAG
GTATCAGAAGGAACTATCTCTTTGTGGGTGAAAGAGATGTCTTTAAAACATCAGATTTATAAACTTAGTCAAGAATTACA
AGAGGTTAGGGCTTTAGCTCAGGGGCTGGTAAGTTCTGGGCAGATTGAGCAAAACCCTGGTTTTTTACCTAGTTTCTAAA
TAAATGGATGCTACATGGCTATAACCTTTCACCCTAAAAAAGCAGATCTTGATATGTGATTTTAAAGGTTCGGTATCTCC
AGAAATTAACCAATGCCGACCAGTGTTGATTTTAAGAGAAGAGATTGTTGGCAGTCAGAAGCTCGTTGTTGTTGTTCCTA
TTAGCAATACTGAACCTAATCCCCTTTGCAGCTTTCATCATGAGTTAGATGATGCTTCACTTAGCGGCCACATGATGGGG
AAAAAGCATTGGGCTAAATGTGATCTGGTATCAACAGTGTCTGTTGACCGTTTAGATCGAATTAGAAGCCGGGATCCGAG
AACGGGTAAAAATTACTTTCATGTAGGAGTCATGACTGATGATGACTTTGACGCAGTAAGAGATAAAGTCATGTACGGTA
TCGGATTTGATGACTTTTTGGATGTAAAAAATGAAGGTGTTCCTGATGGGGCAGCAGCTTCAGTGGTAATTGCTGCCGAA
GTGAACGTTGCTGAAGTAGAAAAACAAAAAAAAGCCATCTGATTTTCATCAAATGGCTTTTTTTTGACCCAAGCCGTTTT
CACGGAGTCATAGTCTAAAAGTTGGTCAATCTTTTACAACTAGCCGCATAAAGCGGACTTACAAGCCCCTAAGGGAACAC
TAGTAATTATAGTGTCGATATTTTAATTATCAATAGTTATAAGATCGAGCATCTGCTTCTTCTTGAGATCATTAGGGGTT
GGAGGTAATCTCCTGTCCTGTAAACGAAAAAACCACCTGGGGAGGTGGTTTTTTCGAGGGGTCAGTAAGTTGGGGAACTT
CTGAACCGTGGTAACAGGGTGTACAAGACCGCTGCCACCAAAATCGTCCTTCCAGTTTAGCTGTAGTTTGGCTCAGACTT
CAAGAACTCTGCATCAGTAATCTCTTGTACACCCTCTTACCAATGGCTGCTGCCAGTGGCGTTTTGTCGTGTCTTTCCGG
GTTGGACTCAAGACGATAGTTACCGGATAAGGCGCAGCGGTCGGGCTGAACGGGGGTTCGTGCACACAGCCCAGCTTGGA
GCGAACGACCTACACCGAGCCGAGATACCTACAGCGTGAGCTATGAGAAAGCGCCACGCTTCCCGAAGGGAGAAAGGCGG
AGAGGTATCCGGTAAGCGGCAGGGTCGGAACAGGAGAGCGCACGAGGGAGCTTCCAGGGGAAACGCCTGGTATCTTTATA
GTCCTGTCGGGTTTCGCCACCTCTGACTTGAGCGTCTGTTTTTGTGATGCTCGTCAGGGGGCGGAGCCTATGGAAAAACG
CCATCGGCGTGGCCTTTTTCCGGCTCTTGGTCTTTTGCTCACATGTTCTTTCCGGCCTTATCCCCTGATTCTGTGGATAA
CCGCATTACCGTCTTTGAGTGAGCTGATACCGCTCGCCGCAGCCGAACGACCGAGCGTAGCGAGTCAGTGAGCGAGGAAG
CGGAAGAGCGTCGGAAGTTGCATTTTCTCCTTACACATCTGTGCGGCATTTCACACCCGGCATGGCGCACTTTTCATACA
ATCCGCACTGATGCCGCATGGTTAAGCCAGTATACACTCCGCTATCGCTACGTGACTGGGTCATGGCTGCGCCCCGACAC
CCGCAAGGTCAACGGCCTGACGCGCCCTGACGGGCTTGTCTGCTCCCGGCATCCGCTCACAGACAAGCTGTGACCGTCTC
CGGGAGCTGTATGTGTCAGAGGTTTTCACCGTCATCCCCGAAGCGTGCGAGGCAGCTGCGGTAAAGCTCGTCGGCGTGGT
CGTGAAGTGATTCACAAATATCGGCCTGTTCATCTGCGTCCAGTTCGTTGAGCTTCTCCAGCAGCGTTAATGTCTGGCTT
CTTATAAAGCGGGCCATGTTAAGGGCGGTTTTTTCCTGTTTGGTCACTGATGCCTCCGTGTAAGGGGGATTTCTGTTCAT
GGGGTAATGATACCGATGAAACGCGAGAGGATGCTCACAATACGGGTTACTGATGATGAACATGCCCGGTTACTTGAACG
CTGTGAGGGTAAACAACTGGCGGTATGGATGCGGCGGGTCTGCCTGGGGGAGCCGGTTGCCCGTTCCGGGAAACTGCCGA
CACTGGCACTGCCGTTACTGCGTCAGCTGGCCGCCATCGGGAATAACCTGAATCAGACAGCGAGGAAGGTGAACAGCGGG
CAGTGGTCTTCCGGTGATCGGGTTCAGGTGTTGGCTGCGCTGATGGCCATCGGGGAGGAGCTGCGTCGGCTGCGTCTGGC
CGTCAGGGAACAGGGCGCGCGGG
>tig00000001.circularised_pilon
GTGTCACTTTCGCTTTGGCAGCAGTGTCTTGCCCGATTGCAGGATGAGTTACCAGCCACAGAATTCAGTATGTGGATACG
CCCATTGCAGGCGGAACTGAGCGATAACACGCTGGCCCTGTACGCGCCAAACCGTTTTGTCCTCGATTGGGTACGGGACA
AGTACCTTAATAATATCAATGGACTGCTAACCAGTTTCTGCGGAGCGGATGCCCCACAGCTGCGTTTTGAAGTCGGCACC
AAACCGGTGACGCAAACGCCACAAGCGGCAGTGACGAGCAACGTCGCGGCCCCTGCACAGGTGGCGCAAACGCAGCCGCA
ACGTGCTGCGCCTTCTACGCGCTCGGGTTGGGATAACGTCCCGGCTCCGGCAGAACCGACCTATCGTTCTAACGTAAACG
TCAAACACACGTTTGATAACTTCGTTGAAGGTAAATCTAACCAACTGGCGCGCGCGGCGGCTCGCCAGGTGGCAGATAAC
CCTGGCGGTGCTTATAACCCGTTGTTCCTTTATGGCGGCACGGGTTTGGGTAAAACTCACCTGCTGCATGCGGTGGGTAA
CGGCATTATGGCGCGCAAGCCGAATGCCAAAGTGGTTTATATGCACTCCGAGCGCTTTGTTCAGGACATGGTTAAAGCCC
TGCAAAACAACGCGATCGAAGAGTTTAAACGCTACTACCGTTCCGTAGATGCACTGCTGATCGACGATATTCAGTTTTTT
GCTAATAAAGAACGATCTCAGGAAGAGTTTTTCCACACCTTCAACGCCCTGCTGGAAGGTAATCAACAGATCATTCTCAC
CTCCGATCGCTATCCGAAAGAGATCAACGGCGTTGAGGATCGTTTGAAATCCCGCTTCGGCTGGGGACTGACTGTGGCGA
TCGAACCGCCAGAGCTGGAAACCCGCGTGGCGATCCTGATGAAAAAGGCCGACGAAAACGACATTCGTTTGCCGGGCGAA
GTGGCGTTCTTTATCGCCAAGCGTCTACGATCTAACGTACGTGAGTTGGAAGGCGCGCTGAACCGCGTCATTGCCAACGC
CAACTTTACCGGACGGGCGATCACCATCGACTTCGTGCGTGAGGCGCTGCGCGACTTGCTGGCATTGCAGGAAAAACTGG
TCACCATCGACAATATTCAGAAGACGGTGGCGGAGTACTACAAGATCAAAGTCGCGGATCTCCTTTCCAAGCGTCGATCC
CGCTCGGTGGCCCGTCCGCGCCAGATGGCGATGGCGCTGGCGAAAGAGCTGACTAACCACAGTCTGCCGGAGATTGGCGA
TGCCTTTGGTGGTCGTGACCACACGACGGTGCTTCATGCCTGCCGGAAGATCGAGCAGTTGCGTGAAGAGAGCCACGATA
TCAAAGAAGATTTTTCTAATTTAATCAGAACATTGTCATCGTAAACCTATGAAATTTACCGTAGAACGTGAGCATTTATT
AAAACCGCTACAACAGGTGAGCGGTCCGTTAGGTGGTCGTCCTACGCTACCGATTCTCGGTAATCTGCTGTTACAGGTTG
CTGACGGTACGTTGTCGCTGACCGGTACTGATCTCGAGATGGAAATGGTGGCACGCGTTGCGCTGGTTCAGCCGCACGAA
CCAGGGGCGACGACCGTTCCGGCGCGCAAATTCTTTGATATCTGCCGTGGTCTGCCTGAAGGCGCGGAAATTGCCGTGCA
GCTGGAAGGTGAGCGGATGCTGGTGCGCTCCGGGCGTAGCCGTTTTTCGCTGTCTACCCTGCCAGCGGCAGATTTCCCGA
ACCTCGATGACTGGCAGAGCGAAGTCGAATTTACCCTGCCGCAGGCGACGATGAAGCGTCTGATTGAAGCGACCCAGTTT
TCTATGGCGCATCAGGACGTTCGCTATTACTTAAACGGTATGCTGTTTGAAACCGAAGGTGAAGAACTGCGCACCGTGGC
GACCGACGGCCACCGTCTGGCAGTCTGTTCAATGCCAATTGGTCAATCTTTGCCAAGCCATTCGGTGATCGTGCCGCGTA
AAGGCGTGATTGAACTGATGCGTATGCTCGACGGCGGCGACAATCCGATGCGCGTGCAGATTGGCAGCAACAACATTCGC
GCCCACGTTGGCGACTTTATTTTCACCTCGAAACTGGTGGATGGTCGCTTCCCGGATTACCGTCGCGTTCTGCCGAAGAA
CCCGGACAAGCATCTGGAAGCTGGCTGTGATCTGCTCAAGCAGGCGTTTGCCCGTGCGGCAATTCTCTCTAACGAGAAAT
TCCGCGGCGTGCGTCTGTATGTCAGCGAAAACCAGCTGAAAATCACCGCCAACAACCCAGAACAGGAAGAAGCGGAAGAG
ATCCTCGACGTTACCTATAGCGGTGCGGAGATGGAAATCGGCTTCAACGTCAGCTATGTGCTGGATGTTCTGAACGCACT
GAAATGCGAAAACGTCCGCATGATGCTGACCGATTCGGTTTCCAGCGTGCAGATTGAAGATGCGGCCAGCCAGAGCGCGG
CTTATGTTGTCATGCCAATGAGACTGTAATGTCCCTCACCCGCTTGTTGATCCGCGATTTCCGCAACATTGAAACCGCGG
ATCTCGCCTTATCTCCCGGCTTTAACTTTCTGGTAGGTGCCAACGGCAGTGGCAAAACCAGCGTGCTGGAAGCCATCTAT
ACGCTCGGCCACGGTCGGGCGTTTCGCAGTTTGCAGATTGGTCGCGTCATTCGCCACGAGCAGGAGGCGTTTGTTCTCCA
CGGACGATTACAGGGCGAAGAGCGCGAGACGGCGATTGGTTTAACCAAAGACAAACAAGGCGACAGCAAAGTCCGTATTG
ACGGTACAGACGGGCATAAAGTCGCGGAGCTGGCGCACCTGATGCCAATGCAGCTGATAACGCCAGAAGGGTTTACTTTA
CTCAACGGCGGCCCCAAATACAGAAGAGCATTCCTCGACTGGGGATGCTTTCACAACGAACCCGGATTTTTCACCGCCTG
GAGCAATCTCAAGCGATTGCTCAAGCAGCGCAATGCGGCGCTGCGCCAGGTGACTCGTTACGAACAGCTACGCCCGTGGG
ATAAAGAACTGATCCCGCTGGCGGAGCAAATCAGCACCTGGCGCGCGGAGTATAGCGCCGGTATCGCGGCCGATATGGCT
GATACCTGTAAGCAATTTCTCCCTGAGTTTTCTCTGACTTTCTCTTTCCAGCGCGGCTGGGAGAAAGAGACAGAGTACGC
TGAGGTGCTGGAACGTAATTTTGAACGCGATCGCCAGCTAACCTACACCGCGCACGGCCCGCATAAAGCGGACTTACGCA
TTCGCGCCGACGGTGCGCCGGTGGAAGATACCTTATCGCGTGGGCAGCTTAAGCTGTTGATGTGCGCCTTACGTCTGGCG
CAAGGAGAGTTCCTCACCCGTGAAAGCGGGCGGCGGTGTCTCTACCTGATAGATGATTTTGCCTCTGAGCTTGATGATGA
GCGTCGCGGGCTGCTTGCCAGCCGCTTAAAAGCGACGCAATCACAGGTCTTTGTCAGCGCGATCAGTGCTGAACACGTTA
TAGACATGTCGGACGAAAATTCGAAGATGTTTACCGTGGAAAAGGGTAAAATAACGGATTAACCCAAGTATAAATGAGCG
AGAAACGTTGATGTCGAATTCTTATGACTCCTCCAGTATCAAAGTCCTGAAAGGGCTGGATGCGGTGCGTAAGCGCCCGG
GTATGTATATCGGCGACACGGATGACGGCACCGGTCTGCACCACATGGTATTCGAGGTGGTAGATAACGCTATCGACGAA
GCGCTCGCGGGTCACTGTAAAGAAATTATCGTCACCATTCACGCCGATAACTCTGTCTCTGTACAGGATGACGGGCGCGG
CATTCCGACCGGTATTCACCCGGAAGAGGGCGTATCGGCGGCGGAAGTGATCATGACCGTTCTGCACGCAGGCGGTAAAT
TTGACGATAACTCCTATAAAGTGTCCGGCGGTCTGCACGGCGTTGGTGTTTCGGTAGTAAACGCCCTGTCGCAAAAACTG
GAGCTGGTTATCCAGCGCGAGGGTAAAATTCACTGTCAGATCTACGAACACGGTGTACCGCAGGCCCCGCTGGCGGTTAC
CGGCGAGACTGAAAAAACCGGCACCATGGTGCGTTTCTGGCCAAGCCTTGAAACCTTCACCAATGTGACCGAGTTCGAAT
ATGAAATTCTGGCGAAACGTCTGCGTGAGTTGTCGTTCCTCAACTCCGGCGTTTCCATTCGTCTGCGCGACAAGCGCGAC
GGCAAAGAAGACCACTTCCACTATGAAGGCGGCATCAAGGCGTTCGTTGAATATCTGAACAAGAACAAAACGCCGATCCA
CCCGAATATCTTCTACTTCTCCACCGAAAAAGACGGTATTGGCGTCGAAGTGGCGTTGCAGTGGAACGATGGCTTCCAGG
AAAACATCTACTGCTTTACCAACAACATTCCGCAGCGTGACGGCGGTACTCACCTGGCAGGTTTCCGTGCGGCGATGACC
CGTACTCTGAACGCCTACATGGACAAAGAAGGCTACAGCAAAAAAGCCAAAGTCAGCGCCACCGGTGACGATGCGCGTGA
AGGCCTGATTGCGGTCGTTTCCGTGAAAGTGCCGGACCCGAAATTCTCCTCACAGACCAAAGACAAACTGGTTTCTTCTG
AGGTGAAATCGGCGGTTGAACAGCAGATGAACGAACTGCTGGCGGAATACCTGCTGGAAAACCCAACCGACGCGAAAATC
GTGGTTGGCAAAATTATCGATGCTGCCCGTGCCCGTGAAGCGGCGCGTCGCGCGCGTGAAATGACTCGCCGTAAAGGTGC
GCTCGACTTAGCGGGCCTGCCGGGCAAACTGGCAGACTGCCAGGAACGCGACCCGGCGCTTTCCGAACTATACCTGGTGG
AAGGGGACTCCGCGGGCGGCTCTGCGAAGCAGGGGCGTAACCGCAAGAACCAGGCGATTCTGCCGCTGAAGGGTAAAATC
CTCAACGTCGAGAAAGCGCGCTTCGATAAGATGCTCTCTTCTCAGGAAGTGGCGACGCTTATCACCGCGCTTGGTTGTGG
TATCGGTCGTGACGAGTACAACCCGGACAAACTGCGTTATCACAACATCATCATCATGACCGATGCGGACGTCGACGGCT
CGCACATTCGTACGCTGCTGTTGACCTTCTTCTATCGTCAGATGCCGGAAATCGTTGAACGCGGTCACGTCTACATCGCT
CAGCCGCCGCTGTACAAAGTGAAGAAAGGTAAGCAGGAACAGTACATTAAAGACGACGAAGCGATGGATCAGTACCAGAT
CTCTATCGCGCTGGATGGCGCAACGCTGCACACCAATGCCAGTGCACCGGCATTGGCTGGCGAAGCGTTAGAGAAACTGG
TGTCTGAGTACAACGCGACGCAGAAAATGATCAACCGCATGGAGCGTCGTTATCCGAAAGCAATGCTGAAAGAGCTTATC
TATCAGCCGACGTTGACGGAAGCTGACCTCTCTGATGAGCAGACCGTTACCCGCTGGGTGAATGCGCTGGTCAGCGAACT
GAACAACAAAGAACAGCACGGCAGCCAGTGGAAGTTTGATGTCCACACCAATGCCGAACAAAACCTGTTCGAGCCGATTG
TTCGCGTGCGTACCCACGGTGTGGATACTGACTATCCGCTGGATCACGAGTTTATCACCGGTGGTGAATATCGTCGTATC
TGCACGCTGGGTGAGAAACTGCGTGGCTTGCTGGAAGAAGATGCGTTTATCGAACGTGGCGAGCGTCGTCAGCCGGTAGC
CAGCTTCGAGCAGGCGCTGGACTGGCTGGTGAAAGAGTCCCGTCGCGGCCTCTCCATCCAGCGTTATAAAGGTCTGGGCG
AGATGAACCCGGAACAGCTGTGGGAAACCACCATGGACCCGGAAAGCCGTCGTATGCTGCGCGTTACCGTTAAAGATGCG
ATTGCTGCCGACCAGTTGTTCACCACGCTGATGGGCGACGCCGTTGAACCGCGCCGTGCGTTTATTGAAGAGAACGCCCT
GAAAGCGGCGAATATTGATATTTAATGGCGTTAACAATGCGAGCGTGCCTGATGCGCTACGCTTATCAGGCCTCTCCTGC
AATATATTGAATTTGCATGTTTTTGTAGGCCGGATAAGGCGTTCACGCCGCATCCGGCAAGAAGCTATAAGAAAAGGGCG
GAGATTATCTCCGCCCTTTTTATTTCTGCAATCCGCAATTATCATCCCGCAGATCTATACTTTTTGGGTCAACACGTAAC
GCTTTACAGGTGATTATCATGGGGCTTTTTGATGACGTTGTCGGTGCCTTTCTGAAAGGCGATGCGGGGAAATATCAGGC
GATTTTGAGCTGGGTTGAGGAGCAGGGCGGCATTCAGGTGCTGCTGGAAAAACTGCAAAGTGGCGGCTTAGGGGCCATTC
TCTCAACCTGGTTGAGTAATCAACAGAGCAATCAGCCGGTTAGCGGCGAGCAACTGGAATCAGCGCTCGGCACAAACGCG
GTGTCCGATCTCGGGCAAAAACTTGGCGTGGATACCAGTACAGCTTCCAGTTTACTGGCAGAACAATTGCCGAAGATTAT
TGATGCGCTCTCACCGCAAGGTGAAGTGTCACCACAAGCCAATAACGATCTGCTTTCCGCAGGCATGGAACTGCTGAAAG
GGAAACTTTTCCGCTAAGCAAAAGGAGAGCACGCAAAGCGCGTTGCATCCCCCTTTTCCCTCGGGTGTTGTACTGATTTT
TGAGCGGAATCGCGTTAGCATGGATCAGGAACCAATCTACCTGGGGAACTCATGGCTATCAAACTCATTGCTATCGATAT
GGATGGCACCCTTCTGCTGCCCGATCACACCATTTCACCCGCTGTTAAAAATGCGATTGCCGCAGCTCGTGCTCGCGGTG
TGAATGTCGTGCTGACGACGGGTCGCCCTTATGCAGGTGTTCACAATTACCTGAAAGAGCTGCATATGGAACAGCCGGGC
GACTACTGCATTACTTATAACGGCGCGCTGGTACAGAAGGCCGCTGATGGTAGCACCGTGGCGCAAACCGCTCTCAGCTA
TGACGACTACCGTTTCCTGGAAAAACTCTCTCGCGAAGTCGGTTCTCATTTCCACGCCCTGGACCGCACCACGCTGTATA
CAGCAAATCGCGATATCAGCTACTACACGGTGCATGAATCCTTCGTTGCCACCATTCCGCTGGTGTTCTGCGAAGCGGAG
AAAATGGACCCCAATACCCAGTTCCTGAAAGTGATGATGATTGATGAACCCGCCATCCTCGACCAGGCGATCGCGCGTAT
TCCGCAGGAAGTGAAAGAGAAATATACCGTGCTGAAAAGTGCGCCGTACTTCCTCGAAATCCTCGATAAACGCGTTAACA
AAGGTACGGGTGTGAAATCACTGGCCGACGTGTTAGGTATTAAACCGGAAGAAATCATGGCGATTGGCGATCAGGAAAAC
GACATTGCAATGATTGAATATGCAGGCGTCGGTGTGGCGATGGATAACGCTATTCCTTCGGTGAAAGAAGTGGCGAACTT
TGTCACCAAATCTAACCTTGAAGATGGCGTGGCGTTTGCCATTGAAAAGTATGTGCTGAATTAATCAGTGGGCGGGCAAA
CGGCATAAACGCGTTTGCCCGCAGCGATTAACAATTTTTGGTAGTGCATAAAATCAGGAACTGCAGTGGTGACGTTACTA
TATCCAGCGTAAGAGTGATTGGCAGCAGCGCGTTAGCGAGGCCGCTCGGGATGCCATCTGTTGTTTTGTACTCATAAAAT
CCCACCGTAAAGGGTTGATGGAAAACCATCACGTTTGAGTAATCCGCTTTTTTATTTTTCTGGTGGATAGAGCCTTTCAG
GCCGTCCAGTATCCATGTACAACGCCGGGTATCACAAATAAAACCATATTGTGTTGCCAGTGCCTTATCTTCTTCGTTGT
TCCAGTCGTAATAGAGCGTAATAGCACCAGAGAAATTCTTATTACTGCTGCTTAAAATAAATTTCGCGTTATCAGAAACG
GTGATTCTTTCACCATGAATTGCCGGATCGTTCAGCATGTTAACTACCTCATCGCCGCCGGTGGTCAACAGATAGTCCAA
CGATTCACCAACAAAAACATAGCCTTTCGTACCGTTACTATCTTCTGCCAGCGATAAACCCTTAATCGTGTCTGACCGCC
ATTGCTCGGCATGTGGACGGCTTGCAGTATTGGAAACCAATCCCCAGGTGATACATCCGGTCAACGCAAATGCCAAAGAA
CACAAACCGGCAGCCTTAAAAAATCCTTTAAAATTCAATTTCATGATTAATCCTTTAAACAAGAGTGCTAAGCCGTTGAA
AGCATACTCTTCTTTCCCCCCAGTTTAGCGCCTGATCTCCCTTTTCAGATTTTTGCCCGACGTAGAACATTTTCTTATGG
ATTGTTCTTTTTGTGATCTAAATTGTAGTACAATAGTATAACTTTGTACTACATTAGGCGCGCAGCAAACGCGAACGTCA
TCACGCTGGTACTACAAAATTGCCGCGTTATGCATCGATCGGGGTAAAGTAGAGAAGAACATACAGAGCACAAGGACTCT
CCATGACTCTCAATAAAACCGATCGCATCGTTATTACGCTGGGTAAACAGATCGTTCACGGCAAATACGTGCCAGGCTCG
CCGCTTCCGGCTGAGGCAGAACTCTGTGAGGAGTTTGCAACCTCGCGCAACATCATCCGTGAGGTATTTCGTTCGCTGAT
GGCGAAGCGGCTGATTGAAATGAAACGTTATCGCGGGGCGTTTGTGGCTCCGCGTAACCAGTGGAATTACCTCGACACTG
ACGTACTGCAATGGGTGCTGGAAAACGACTACGACCCACGGCTTATCAGTGCAATGAGCGAAGTGCGAAATCTGGTGGAA
CCGGCGATTGCCCGTTGGGCAGCAGAACGCGCGACCTCCAGCGATCTGGCGCAGATTGAATCGGCGCTGAACGAGATGAT
TGCTAACAATCAGGACCGCGAAGCGTTTAACGAAGCGGATATTCGCTACCACGAGGCGGTGCTGCAGTCGGTACATAACC
CGGTGTTACAGCAACTGAGCATTGCGATCAGTTCGCTGCAGCGGGCGGTTTTTGAACGAACCTGGATGGGCGATGAGGCC
AACATGCCGCAAACGCTCCAGGAACATAAGGCGCTGTTCGATGCGATAAGGCATCAGGACGGCGATGCGGCAGAGCAGGC
GGCGCTTACCATGATCGCCAGCTCGACACGAAGGTTAAAGGAAATCACATGACAGCTCGCTACATCGCAATTGACTGGGG
ATCGACCAATCTGCGCGCTTGGCTTTATCAGGGCGACCACTGCCTGGACAGCAGGCAATCAGAAGCAGGCGTCACGCGCC
TGAACGGAAAATCTCCGGCTGCGGTGTTAGCAGAAGTGACGACCGACTGGCGTGAAGAGAATACGCCAGTGGTAATGGCA
GGAATGGTCGGCAGCAATGTCGGCTGGAAAGTTGCGCCGTATTTATCCGTTCCAGCCCGTTTTTCGTCTATTGGCGAACA
ATTAACGTCTGTTGGCGACAATATCTGGATTATTCCCGGATTATGCGTCTCTCATGACGATAACCACAATGTGATGCGCG
GCGAAGAAACACAATTGATCGGCGCGCGCACTCTGGCTCCTTCCTCTCTTTATGTCATGCCCGGTACGCATTGCAAATGG
GTGCAGGCCGATAGCCAGCAAATTAACGATTTTCGCACCGTGATGACCGGTGAATTACATCATTTACTGTTAAATCACTC
ATTGATTGGCGCAGGTTTGCCGCCGCAGGAAAACTCTGCCGATGCTTTCGCGGCTGGTCTTGAGCGTGGCCTTAATGCTC
CCGACATATTGCCGCAGCTTTTTGAAGTTCGCGCCTCGCATGTGCTGGGAACACTTCCCCGCGAACAGGTCAGCGAATTT
CTCTCTGGTTTGTTGATTGGCGCAGAGGTCGCCAGTATGCGCGACTATGTGACCCATCAACAAGTCATCACCCTTGTCGC
CGGAACATCGCTGACCGCGCGCTACCAGCAAGCCTTTCAGGCGATGGGTTGCGACGTGACGGCGGTGGCAGGCGACACGG
CATTTCAGGCTGGTATAAGGAGCATCGCTCATGCAGTGGCAAACTAAACTCCCGCTGATCGCCATTTTGCGCGGCATTAC
GCCCGACGAGGCACTGGCACATGTTGGCGCGGTGATTGACGCCGGGTTCGACGCGGTTGAAATCCCGCTGAATTCTCCAC
AATGGGAGCAGAGCATTCCCGCCATCGTTGATGCGTATGGCGACAAGGCGTTGATTGGCGCAGGTACGGTACTCAAACCT
GAACAGGTCGATGCGCTCGCCAGGATGGGCTGCCAGCTCATCGTTACGCCCAATATCCATAGTGAAGTGATCCGCCGTGC
GGTGGGCTACGGCATGACCGTCTGCCCCGGCTGCGCGACGGCGACCGAAGCCTTTACCGCGCTCGAAGCGGGCGCGCAGG
CGCTGAAAATATTTCCGTCATCGGCTTTTGGTCCGCAATACATCAAAGCATTAAAAGCGGTATTACCACCGGACATCGCG
GTCTTTGCCGTTGGCGGTGTGACGCCAGAAAACCTGGCGCAGTGGATAGATGCAGGCTGTGCCGGAGCGGGCTTAGGTAG
CGATCTCTATCGCGCCGGGCAGTCCGTAGAACGGACTGCGCAGCAGGCAGCAGCATTTGTTAAGGCGTATCGAGAGGCAG
TGCAATGAAAATCACCAAAATTACCACGTATCGTTTACCTCCCCGCTGGATGTTCCTGAAAATTGAAACCGATGAAGGCG
TGGTCGGTTGGGGCGAGCCCGTGATTGAAGGCCGCGCTCGCACGGTGGAAGCGGCAGTCCACGAGCTGAGTGACTATTTG
ATTGGTCAGGACCCGTCACGCATCAACGACTTATGGCAAGTGATGTATCGCGCCGGATTTTATCGTGGCGGTCCAATCCT
GATGAGCGCCATCGCCGGGATCGACCAGGCGTTATGGGATATCAAAGGTAAAGTGCTGAATGCGCCGGTCTGGCAACTGA
TGGGCGGCCTGGTTCGCGACAAAATTAAAGCCTACAGTTGGGTCGGCGGCGATCGTCCTGCGGATGTTATCGACGGCATT
AAAACGCTACGCGAAATCGGCTTCGATACCTTCAAACTGAACGGTTGTGAAGAACTGGGGCTAATTGATAACTCCCGCGC
GGTAGATGCGGCAGTCAACACCGTGGCGCAAATTCGTGAAGCCTTTGGCAATCAGATTGAGTTTGGTCTTGATTTCCACG
GTCGCGTCAGCGCGCCGATGGCGAAAGTGCTGATTAAAGAGCTGGAACCGTATCGCCCGCTGTTTATTGAAGAGCCGGTG
CTGGTGGAACAGGCCGAATACTACCCGAAACTGGCGGCACAAACGCATATTCCACTGGCGGCGGGTGAGCGCATGTTCTC
ACGCTTCGATTTTAAACGTGTGCTGGAGGCAGGCGGTATTTCGATTCTGCAACCGGATCTCTCCCATGCACTGTCTCTTA
TACACAAATCCCCACCCGGGGATTTGTGATGTCTGTCAGTCTGCTTTAGGGGGACTCTTTCCATCCGGTAGTTTCCTTCC
TCCCCGGCAGCGATTTTTTGAACTTTTTCCTCACCCGTTGATCTTCTCTTATATTTCATTTTCTTCGGGTCTGTTATGGT
ACTTTCTGATTGTTATTCATGGGCTAACGAGCAGTTTGGACATGCCCGTCTCGGTGATCCGCGTCGTACACGACGCCTTG
TGTCACTGGCCTCTTCTCTCGCTCAGCATGCAGGTCTTTCTATTGTGAAATCATCCCAGTCCACTGCTCAGGTTGAAGGT
GCGTACCGCCTGATACGTAACCCGTCTGTGTCCCCGCAAGCCATTGCCGAAGCCGGATTTACCGCCACTGTAAGGGCATG
TGAGGCTCATCCGCTGCTCCTCGCGCTGGAAGACACCACCACCATTAACTTCAGTCACAGTACGGCATCTGATGACCTGG
GGAATACCACCACTAACCCGAAGACGCGCGGGCTGCTGGCTCACTCTGTCCTGATGTACGCCCCCGACAGCGCCCTGCCA
GTCGGTCTTATCGAACAGCAGCGCTGGAGTCGTGCCACGGACACCTACGGTGTTAAGCACCAGCGAAAAGAACGTCCCTA
TGAAGAAAAAGAAAGTTACCGCTGGCAGCAGGCTTCGGAGCGCATGGCCGAACGGCTGGGGGAGATACAGAAACGGGTAA
TCACTGTCTGTGACCGGGAAGCGGATATCTGGCATTACCTGCATTATAAAGTCAGCCACGGGCAGCGCTTCGTGGTGCGT
GCAGCACAGAATCGCCGGCTGGAAGAAGCACCCGGCAAGCTCTTCGAACTGCCGGAAGTCCTGGCAACCGCGGGAAGCCA
CACGCTGAATGTGATGCAAAAGGCGGGCGGGCAGCCCGCCAGGCCCGGATGTTCATCAGTTACAGCGAAGTCAGCATAAA
AAATCCCGACAACAGCGGCCAGGCGCTCCCGCTCACGTATGTCTGTTGCCGGGAGCAGGCAGAGGACGGCGCCTGCTGGC
ATCTGCTGACGTCAGAAAAAGTGGCGAGTGCCGCCGATGCGCGACGTATCGTCAGCCATTACGAGCGACGCTGGCTGATA
GAGGAATACCACAAGGCGTGGAAAAGTGGTGGTACATGTGTGGAATCGCTGCGAATGCAGACCCGGGATAACCTCGAGCG
CATGGTGGTTATCAAGGCGTTTATCGCGGTGCGGGTGCTGGGCCTGCGGCAGGGCGGTATCAGTGAAGAAACACAAAATG
ACAGCTGTGAGAAAATACTGACGCCGACAGAGTGGAAACTGCTGTGGGTTAAGCTGGAAGGAAAACCGCTTCCGTCACAG
ATGCCGACACTGAAATGGGCCTGTCTGAAACTGGCGAAACTGGGGCGATGGCATGACAGCAAACGCACCGGTCGCCCCGG
TTGGGTAGTCATGTGGGATGGCTGGTTCAGACTTCAGGATATGGTTGAGGGTTACCTGGTGATGAAGTCTCTTGATCAGG
AGATCTGATCAAGAGACAGCCCATGCAGGCGGTATTACCGAATGCTACAAAATTGCCGGAATGGCAGAAGCCTATGACGT
GACCCTTGCGCCGCACTGTCCGCTCGGACCGATTGCACTGGCGGCTTGCCTGCATATCGACTTTGTTTCCTATAACGCCG
TCCTTCAGGAACAAAGTATGGGCATTCATTACAACAAAGGCGCGGAGTTACTCGACTTTGTGAAAAACAAAGAGGACTTC
AGCATGGTCGGCGGTTTCTTTAAACCATTAACGAAACCGGGCTTAGGCGTGGAAATCGACGAAGCTAAAGTTATTGAGTT
CAGTAAAAATGCCCCGGACTGGCGTAATCCGCTCTGGCGTCATGAAGATAACAGCGTAGCAGAGTGGTAATTCCTGCCAC
GTAAGCCCCTCATCGGGCACTAAAACAGCAATACAAAAATATAACCCTCTGTAAATTACAGGGCATGGTGAGCGGCTTCG
CTATGCCCAAAATCTGGAGAAAGCTCGCTATGGATATTCCCGTTAATGCAGCAAAGCCGGGGCGTCGGCGTTATCTGACG
CTGGTGATGATCTTTATTACGGTGGTCATTTGTTATGTTGACCGCGCTAACCTGGCCGTGGCTTCTGCCCATATTCAGGA
AGAGTTTGGTATTATTAAAGCGCAAATGGGCTATGTATTTTCGGCCTTCGCCTGGCTTTATACGCTATGTCAGATCCCCG
GTGGTTGGTTTTTAGATCGCGTAGGTTCACGCGTGACTTATTTTATTGCGATATTTGGCTGGTCAGTGGCGACGTTATTC
CAGGGCTTTGCCACGGGCTTAATGTCATTAATTGGTCTGCGCGCGATAACCGGTATTTTCGAAGCGCCCGCGTTCCCGAC
CAATAACCGGATGGTAACCAGTTGGTTCCCGGAACATGAACGTGCTTCTGCCGTTGGTTTTTATACGTCTGGTCAGTTTG
TCGGTCTGGCGTTTCTGACTCCGCTGCTGATCTGGATTCAGGAGATGTTGAGCTGGCACTGGGTGTTCATTGTCACCGGT
GGTATCGGCATTATCTGGTCGCTGATTTGGTTTAAGGTTTATCAGCCGCCGCGTCTGACCAAAGGCATCAGCAAAGCTGA
ACTGGATTACATTCGTGATGGCGGCGGTCTGGTGGATGGCGATGCGCCGGTGAAGAAAGAGGCGCGTCAGCCGTTAACAG
CCAAAGACTGGAAACTGGTGTTCCATCGTAAACTGATCGGTGTCTATCTTGGGCAATTTGCGGTGGCTTCTACACTGTGG
TTTTTCTTAACCTGGTTCCCGAACTATTTAACCCAGGAAAAAGGAATCACAGCGCTGAAAGCAGGCTTTATGACCACGGT
GCCGTTCCTCGCGGCGTTTATTGGCGTCCTGCTCTCTGGCTGGGTCGCGGATCTGCTGGTACGTAAGGGCTTTTCACTGG
GCTTTGCGCGTAAAACGCCGATTATCTGCGGCTTGCTGATCTCCACCTGCATTATGGGCGCTAACTACACCAACGATCCG
ATGATGATTATGTGCCTGATGGCGCTGGCATTCTTCGGCAACGGTTTTGCTTCGATTACCTGGTCGCTGGTTTCTTCTCT
GGCACCGATGCGCCTGATTGGTTTAACCGGCGGCGTGTTTAACTTTGCCGGTGGTCTGGGCGGCATCACTGTTCCGCTGG
TGGTGGGGTACCTGGCGCAGGGTTACGGTTTCGCACCTGCACTGGTTTATATCTCCGCCGTCGCGTTGATTGGCGCGCTC
TCTTACATCATGCTGGTGGGCGATGTGAAGCGCGTTGGATAATCTTTCAACTGTGGAATATGCGCCACTCCACTGCGCAT
AATCCACTTTCTTAAAGCCGGTGCGGTCAGGCATCGGCTTTTTACTATCTTGCCGAAGAGTTTTAAACGCAGTTTGCGAG
TGGCGCGCCAGTAAGCGGTATTGAGCTTCTCTGGCTGCTTCAGTAATACCGAACGCAGAATCTCTGCGCTATCCAGCGCA
TAGCTAATCCCCTCCAGCGAGCTGGCGCTGATAAATCCCGCCGCTTCGCCAATCAGAAAGGCGTTGTCCTTGCCGCAGAC
AAAATCCTGCCAGCGTGAGGGAAACAGCACCGTGCATTTTTCGCTTTTCACCGCCTTACCAAACTGGAACTGAAAGGCAC
TCATTTTCTCTTTCAGCGCCGCGAAACGCGCCTGACCGTCTTTCATCGGATAGGCACCGCCAAAGATAAAATAACCGTCT
TTGCTGATACTCCATGAGTAACAGTCAGTTATCGCATTATCAAAGATGCAGGAGTAGAACGGTACCGGATGTTTCTCTGC
GAACCACTGCTGGATGGCGACATATTTACGAATCTGATGATCCGGGTAGAGATGTCGCCGCACCATCGAGTTGGCACCAT
CGGCACCGACCAGATAGCGGGCGGTAATATGCTGCTCCCAGCCGTCTGCGCGAAAAATGACATGCCATTTATCATCCTCA
CGCCAGATTTTTCGACACAGGCTGTCGTGGTAAACCTCAACGCTGGCGGGGATCAGCGATTTCATCCACAAGTCGAAAGC
ATGGCGATTAATATTGATATAGCTTCGCTGGTAGTTACGCGTGAGCGATGCGGCGACGTCGACGGCTTTGACGCTGAAAA
TCTGCGGGTTGGCGATGACATCGACAGGAAGCGTCAGTCCATCGCGAATAAAAGATCGCTGCGCGTCCGGTGCCAGCAGA
CCGCCACAAGGTTTGCTGAAACCTTCAGTACCACACTGGTGCTTTTTATCCAGCGCGATCACCTGCATTTTTCCTGCTAA
CTTTCGTGCCAACGCCGACCCTGCCGGGCCGAGGCCAATAATCGCCACGTCGAAATGTTCCATCTTTTCACTCACATTCA
TCACGATGGCGAAAGACTATTGTCTGAAAGTGAAGTCCTTGTGAAGTATGATGGCGGGACCCGTTTTGTATCAGGACCGC
GCCATGAAACAGATAACCTTTGCTCCCCGTAATCACCTGCTCACCAATACCAATACCTGGACGCCCGACAGCCAGTGGCT
GGTATTTGACGTGCGTCCTTCTGGGGCGTCGTTTACCGGCGAGACCATTGAGCGTGTGAATATCCATACCGGCGAGGTCG
AGGTTATCTATCGCGCGTCACAGGGCGCACACGTCGGCGTGGTGACCGTTCATCCGAAGTCAGAGAAGTATGTCTTCATC
CACGGCCCGGAAAATCCTGATGAAACATGGTATTACGACTTTCATCATCGGCGCGGAGTGATTGTTGAAAGCGGCAAGGT
GAGCAATCTCGATGCAATGGATATTACCGCGCCATATACGCCAGGAGCGCTGCGCGGCGGCAGTCATGTACATGTCTTTA
GCCCAAACGGTGAAAGGGTGAGCTTTACCTACAACGACCATGTAATGCATGAACTCGATCCGGCGCTGGATTTGCGAAAT
GTCGGTGTTGCTGCACCGTTTGGCCCAGTCAACGTACAAAAGCAGCATCCGCGTGAATACAGCGGTAGCCACTGGTGCGT
GCTGGTAAGTAAAACCACGCCCACGCCACAGCCTGGCAGTGATGAAATCAATCGTGCTTATGAAGAAGGATGGGTAGGAA
ATCACGCACTGGCGTTTATTGGCGATACGCTTTCGCAAAAAGGCGAGAAAGTGCCGGAGCTGTTTATTGTCGAGTTGCCG
AAAGATGAAGCTGGCTGGAAAGCGGCAGGTGAAGTGCCGTTAAGTGGAACGGAAACAACCCTGCCCGCGCCACCGCGTGG
CGTCGTGCAGCGACGTTTAACCTTTACGCACCATCGTATTTATCCGGGCCTGGTTAACATTCCGCGCCACTGGGTGCGTT
GTAATCCTCAAGGAACACAAATTGCGTTTTTAATGCGCGATGATAACGGCATTGTGCAACTGTGGCTTATCTCGCCACAG
GGCGGTGAACCACGCCAGTTAACCCATAATAAAACGGATATTCAGTCTGCATTTAACTGGCATCCATCAGGCGAATGGCT
GGGATTTGTGCTGGATAATCGGATTGCTTGTGCCCATGCGCAAAGCGGCGAGGTTGAGTATTTAACCGAAAACCACGCCA
ATCCACCTTCTGCGGACGCCGTGGTTTTCTCGCCGGATGGTCAATGGTTGGCGTGGATGGAGGACGGTCAGTTGTGGATC
ACCGAAACTGATCGCTAAATCAGTTATCAGGCATTCTGGCCGGTGGAATAACCGCATTGGTGGCTTGTGCGTTGGCTTCG
CTTTTTTCAACGCGCGAGCGCACTGAGCTGTCTTTGCGGAACACATCCCACGGTAGCAATATTGTGTCCAGTACTGCGGT
AAATGGCATGTCGAGTATCGCCAGCGATTTTGTGCCCCAGTTGGTTTCATCGTCGCCAATCATGGTTGCGCTGGCGCGGG
TGCCAGGATACGTTCCTTCTTTCCCCCCGGTATGGGACATCACGCTGGAGCATCCTCCGAGTAATGTCATTCCGCTGCAT
ATCATGAACGCTAACAACACATTTCTTATCATAATAAATTCATCTGTTGATCGTGGGTGTTGGCCTGATGAGTTATAGCG
ATCCCTTGCTGAAAATAACATCATCATTACGTCGCACTGTGGCGGCTATCGCACTTTAACGTTTCGTGCTGCCCCCTCAG
TCTATGCAATAGACCATAAACTGCAAAAAAAGTCCGCTGATAAGGCTTGAAAAGTTCATTTCCAGACCCATTTTTACATC
GTAGCCGATGAGGACGCGCCTGATGGGTGTTCTGGCTACCTGACCTGTCCATTGTGGAAGGTCTTAGATTCTCGCTGATT
TCAGGAGCTATTGATTATGCGTAACTTTGATTTATCCCCGCTTTACCGTTCTGCTATTGGATTTGACCGTTTGTTTAACC
ACTTAGAAAACAACCAGAGCCAGAGTAATGGCGGCTACCCTCCGTATAACGTTGAACTGGTAGACGAAAACCATTACCGC
ATTGCTATCGCTGTGGCTGGTTTTGCTGAGAGCGAACTGGAAATTACCGCCCAGGATAATCTGCTGGTGGTGAAAGGTGC
TCACGCCGACGAACAAAAAGAGCGCACCTATCTGTACCAGGGCATCGCTGAACGCAACTTTGAACGTAAATTCCAGTTAG
CTGAGAACATTCATGTTCGTGGTGCTAACCTGGTGAATGGTCTGCTGTATATCGATCTCGAACGCGTGATTCCGGAAGCG
AAAAAACCGCGCCGCATCGAAATCAACTAATTCCCTAAGGCCGCCTGGCGCGGCCTGACATCTCCATGCTCGCCGTCAGG
GAGCATATGCGAATCTTCGGATTTGCAGGTACTTACTCGCTTCTTAGAAGGAGAAATGACTATGCGTAACTTCGATTTAT
CCCCACTGATGCGTCAATGGATCGGTTTTGACAAACTGGCCAACGCACTGCAAAACGCCGGTGAAAGCCAGAGCTTCCCG
CCGTACAACATTGAGAAAAGCGACGATAACCACTACCGCATTACCCTTGCGCTGGCAGGTTTCCGTCAGGAAGATTTAGA
GATTCAACTGGAAGGTACGCGCCTGAGCGTAAAAGGCACGCCAGAGCAGCCAAAAGAAGAGAAAAAATGGCTGCATCAAG
GGCTTATGAATCAGCCTTTTAGCCTGAGCTTTACGCTGGCTGAAAATATGGAAGTCTCTGGCGCAACCTTCGTAAACGGT
TTACTGCATATTGATTTAATTCGTAACGAGCCTGAACCCATCGCAGCGCAGCGTATCGCTATCAGCGAACGTCCCGCGTT
AAATAGCTAATTAGCTATTCTCTTTGCCCCGCCATTCTGGTGGGGCTTTTTTTGTCTTTTTTCTTCGACAATGCGTTAAA
TTCCGCCTGTTTAAGATATTTCGGCACGTTCTTTCCCGTGATAATGTGCGCTATAAGGCAAATCTGCTTCACCGATTCAG
CCATAATCCGTAGCAATTAAAATGTTATTTCAAGAGAAATGGACGATGAGTGATATAGCATTAACGGTCAGTATTCTGGC
TTTGGTGGCGGTCGTCGGGTTGTTTATCGGCAACGTCAAGTTTCGCGGTGTTGGATTGGGCATTGGCGGCGTGCTGTTCG
GTGGGATCATCGTCGGCCATTTTGTTTCTCAGGCGGGGATGACATTAAGTAGCGATATGCTGCATGTTATTCAGGAGTTT
GGCCTGATCCTGTTCGTTTATACCATCGGGATTCAGGTAGGGCCGGGCTTCTTTGCCTCATTGCGCGTCTCCGGATTACG
CCTCAACCTGTTTGCTGTTCTGATCGTCATCATCGGTGGTCTGGTTACCGCCATCCTGCATAAACTGTTTGATATTCCAC
TGCCGGTAGTGCTGGGGATTTTTTCCGGCGCGGTCACCAATACGCCAGCGCTGGGGGCAGGGCAGCAGATCTTGCGCGAC
CTGGGGACACCGATGGCGATGGTCGATCAAATGGGGATGAGCTATGCGATGGCGTATCCATTTGGGATTTGCGGCATTTT
GTTCACTATGTGGATGCTGCGGGTTATTTTCCGCGTCAATGTTGAGACTGAGGCCCAGCAGCACGAGTCCACGCGAACCA
ACGGCGGTGCGCTAATCAGGACGATTAACATCCGAGTTGAGAATCCTAATTTGCATAATTTAGCCATTAAAGATGTGCCG
ATTCTCAATGGCGATAAAGTTATTTGCTCACGATTGAAACGAGAAGAAACCCTAAAAGTGCCTTCGCCAGAAACCGTTAT
TCAACTGGGCGATTTGCTGCATCTGGTGGGGCAGCCTGCGGATTTACATAATGCGCAACTGGTGATTGGTCAGGAGGTCG
ATACCTCGCTGTCTACGAAAGGCACTGATTTGCGCGTCGAGCGTGTGGTGGTCACCAATGAAAACGTGCTCGGTAAACGT
ATTCGCGACCTGCACTTTAAAGAACGCTATGACGTTGTTATCTCGCGCCTGAATCGTGCTGGTGTTGAATTAGTTGCAAG
TAGCGATATCAGCCTGCAGTTCGGCGATATCCTCAACCTGGTGGGGCGTCCGTCCGCAATTGATGCCGTTGCCAATGTGC
TGGGGAATGTGCAGCAAAAACTGCAACAGGTTCAGATGCTGCCAGTGTTTATTGGTATCGGGCTTGGCGTATTGTTAGGT
TCTATTCCCGTCTTTGTGCCTGGGTTCCCGGCGGCGTTGAAACTCGGGCTGGCGGGCGGTCCGCTGATTATGGCGTTGAT
CCTCGGGCGTATCGGCAGTATCGGCAAGCTGTACTGGTTTATGCCGCCAAGCGCCAACCTCGCGCTGCGGGAGCTGGGGA
TCGTACTGTTCCTCTCGGTCGTTGGCCTGAAATCCGGCGGCGATTTTATCCATACACTGGTGGATGGCGAAGGGTTAAGC
TGGATTGGTTATGGTGCCCTGATCACCGCCGTTCCGCTGATTACTGTTGGCATTCTGGCGCGGATGTTAGCCAAAATGAA
TTACCTGACCATGTGCGGGATGCTGGCAGGTTCCATGACCGATCCTCCGGCGCTGGCGTTTGCTAATAATCTTCATCCAA
CCAGCGGTGCGGCGGCGCTCTCTTACGCCACTGTCTATCCGTTAGTGATGTTCCTGCGCATTATCACACCCCAATTACTG
GCGGTGCTCTTCTGGAGTATCGGTTAACTCTTTTCCGGGTGGAGTCGCCGTAAATGGTACTCCGCCTGGTATTTCTGAAC
ATCATCGAGTCATTTACACACTCGCCATTCTGGTTATTACCTGTCCGTATTCTTCAGCACAGCTGACGGCGCATAACCAA
ATTTATGCTTAAAGGCTTTGCTGAAATGAAAGGAGTCGAAGAAGTTGAGCGTATCAGCGACTTCGCCAACCGAGTTCCCT
TGTTGCTTTAATAGCGATAGCGCCAGATCCAGACGCGCATCGAGGTAATATTCTTTCGGCGTCTTGCCGGTATAGCGTAA
AAACAGACGACGCAACCAGGCCTCGCTACAGGGGATCGTGGCAGCCATATCAGCTACGCTCCAGCGTTGTTGTAGACTGG
CATGTAAAGTGGCAATTAATTTTTCAATTTGCCGCCGTTGTGGATCTTTTTTACCGACTGCGTGCATAAGACAAATCCAC
TGATAAATAATTTTCGTCAGAAAAGCGACTGCCAGATTATTTTTTATTGCTTCTGGTGAAGTAATTAACTCAGCAACTTC
GGTGAGTTCCTGATTATAAACTTCGCCATTATAAATAACGCTTTGCTGACCGACGGGAATATCCATCATACTGGTGGGGG
TAAATTCCATCCAGTACTGTTCCCAGACTAAACCTTCACAGTGATAAGAGTGAATATCCATTGGCTTTAAAAATATAATA
CAGTTGCCATGCAGAGTTATTTGTTCGTCATTCTTTAAAAGAATTTTCCCACATCCTTGTACGGTATACACCGCAACCCA
TGAGTTGGCGATAAGCGGTTTCTTCTTGTCCCGCGGCCAGATCACCCGGTAATGCTCGTCGGCGTAGGTATGCCAGAGCG
ATATCAGAGAAATTCCGCTGGAGATCACATTTTCGTTAATCAATAAGGGAATATTGTACGGAGTTTCGTTTTTTACATCC
GAACTTTGCAATTTTCCATTCATTTTAATATCCCTCCGGCGAATTATGCTCACAACCTGAACTTAACAGAAAACAATCCG
TTCAGGGATACGACGTTTGTATTTTAAGAATCTGACTGCCTGACCCGACGCATTTTACCTCTCCCTATATTCATGCGTCC
GGGACATAAACATAAATAAGGGCTATGAGATGAATTCGTTACAAATCTTGAGTTTTGTCGGTTTTACGCTGCTGGTAGCG
GTCATCACCTGGTGGAAGGTCCGTAAAACAGATACCGGATCGCAACAAGGCTATTTTCTTGCCGGACGTTCACTAAAAGC
GCCGGTTATTGCCGCTTCGTTAATGCTAACCAACCTTTCCACGGAACAACTGGTCGGCCTTTCCGGGCAGGCCTACAAAA
GTGGCATGTCGGTGATGGGCTGGGAAGTCACCTCTGCAGTGACGCTGATCTTCCTCGCGCTAATCTTTTTACCGCGCTAT
CTGAAGCGCGGCATTGCCACCATCCCCGATTTTCTGGAGGAACGTTATGATAAAACGACGCGTATTATCATCGACTTCTG
CTTCCTCATTGCCACCGGCGTCTGCTTTCTGCCGATTGTTCTCTATTCCGGCGCGTTGGCGCTCAACAGCCTGTTTCATG
TGGGTGAGTCGCTACAACTTTCCGATGGTGCGGCTATCTGGTTACTGGTTATTTTGCTTGGTCTGGCGGGAATTTTGTAT
GCGGTGATCGGCGGACTGCGCGCAATGGCAGTGGCGGACTCCATTAACGGTATTGGGCTGGTTATTGGCGGGTTGATGGT
GCCGGTATTTGGCCTGATCGCGATGGGCAAGGGCAGCTTTATGCAGGGCATTGAGCAACTCACCACCGTTCACGCCGAGA
AATTAAACTCAGTCGGCGGCCCGACCGATCCCTTGCCGATTGGCGCGGCATTTACCGGTTTGATTCTGGTGAACACCTTT
TACTGGTGTACAAATCAGGGCATCGTGCAACGCACGCTGGCGTCAAAAAGCCTGGCGGAAGGGCAAAAGGGGGCGCTGTT
AACGGCGGTGCTGAAAATGCTCGACCCGCTGGTACTGGTGCTGCCAGGGTTGATTGCGTTTCATCTGTATCAGGATTTAC
CGAAAGCCGACATGGCCTACCCGACGCTGGTCAATAACGTTCTGCCGGTGCCACTAGTGGGCTTCTTCGGTGCGGTGTTA
TTTGGTGCGGTGATCAGTACCTTCAACGGCTTTCTGAATAGCGCCAGTACGTTATTCAGTATGGGTATTTACCGGCGCAT
CATTAACCAGAATGCCGAGCCGCAACAGCTGGTCACCGTCGGGCGCAAATTTGGTTTCTTTATCGCCATCGTTTCGGTGA
TGGTCGCGCCGTGGATCGCCAACGCGCCGCAGGGGCTGTATAGCTGGATGAAACAGCTCAACGGTATTTACAACGTGCCG
CTGGTTACCATCATCATTATGGGCTTTTTCTTCCCGCGCATTCCGGCGCTGGCGGCAAAAGTGGCGATGGGGATTGGCAT
AATCAGCTACATCACCATCAACTATCTGGTGAAGTTCGACTTCCATTTCCTCTATGTGCTGGCCTGTACGTTCTGCATCA
ACGTGGTCGTGATGCTGGTGATCGGTTTTATCAAACCGCGCGCCACGCCGTTCACCTTCAAAGATGCGTTTGCGGTGGAC
ATGAAACCGTGGAAAAACGTCAAGATTGCGTCAATTGGTATCCTGTTCGCGATGATTGGCGTCTATGCCGGGTTGGCTGA
ATTCGGTGGCTACGGTACGCGCTGGTTAGCGATGATCAGTTATTTCATCGCCGCCGTAGTGATTGTCTACCTGATTTTTG
ACAGCTGGCGGCATCGTCACGACCCAGCCGTAACCTTTACTCCCGATGCGAAGGATAGCCTATGAAACGCCCCAATTTTC
TGTTCATCATGACCGATACCCAGGCCACCAATATGGTCGGTTGCTATAGCGGTAAGCCGCTGAATACGCAAAATATTGAT
AGTCTGGCGGCAGAAGGTATTCGCTTTAATTCTGCCTACACCTGTTCACCGGTTTGTACACCTGCACGCGCCGGACTATT
CACCGGTATCTACGCTAACCAGTCCGGCCCGTGGACCAACAACGTCGCGCCGGGCAAAAACATCTCCACGATGGGGCGCT
ACTTTAAGGATGCGGGCTATCACACCTGTTACATCGGCAAATGGCATCTCGATGGACATGACTATTTCGGCACTGGCGAG
TGTCCGCCGGAGTGGGACGCTGATTACTGGTTCGATGGAGCGAACTATCTTAGTGAACTGACGGAGAAAGAGATTAGCCT
GTGGCGCAATGGCCTAAACAGCGTTGAGGATTTACAGGCGAACCATATTGACGAAACCTTCACCTGGGCGCACCGCATCA
GCAATCGGGCGGTGGATTTTCTGCAACAGCCCGCGCGCGCCGAGGAACCTTTCCTGATGGTGGTTTCGTATGATGAGCCG
CATCACCCGTTTACCTGTCCGGTGGAGTATTTAGAGAAATATACTGATTTTTACTACGAACTGAGTGAGAAAGCAGAGGA
TGACCTGGCGAACAAACCGGAACATCACCGCTTATGGGCGCAGGCGATGCCATCGCCAGTCGGTGATGACGGGCTTTATC
ACCATCCGCTCTATTTTGCCTGCAATGACTTTGTTGATGACCAAATCGGACGGGTCATCAATGCCTTAACGCCAGAGCAA
CGTGAAAATACGTGGGTTATTTATACCTCCGATCACGGCGAAATGATGGGCGCACATAAGCTGATCAGTAAAGGAGCGGC
GATGTATGACGACATCACCCGCATTCCACTGATCATCCGTTCGCCGCAAGGGGAGCGGCGACAGGTCGATACGCCAGTCA
GTCATATTGATTTACTGCCGACAATGATGGCGCTGGCAGATATTGAAAAACCAGAGATTCTGCCGGGGGAAAATATCCTT
GCCGTGAAAGAACCACGTGGCGTGTTGGTGGAATTTAATCGCTACGAGATTGAGCATGACAGCTTTGGCGGTTTTATTCC
GGTGCGTTGCTGGGTAACGGATGACTTTAAACTGGTGCTCAACCTCTTCACCAGTGATGAACTTTACGATCGCCGTAATG
ACCCAAATGAAATGCATAACCTGATCGATGATATCCATTTTGCCGACGTTCGCAGCAAAATGCATGACGCCTTATTGGAT
TACATGGACAAAATTCGCGATCCGTTCCGCAGTTATCAATGGAACCTGCGTCCGTGGCGCAAAGATGCACAACCGCGCTG
GATGGGGGCGTTTCGTCCACGCCCACAGGATGGTTATTCTCCAGTGGTACGCGACTATGACACCGGTTTACCGACACAAG
GGGTGAAGGTGGAAGAGAAAAAACAGAAGTTCTGATGCATTATTGCTGTTCCTGGCCTAATTTTTCGGCGAGGAACAGTT
TACAAGGAGCAACAATGAAAATTTCCCGCCTCGGAGAAGCGCCCGATTACCGCTTCTCGCTGGCTAATGAGCGTACTTTT
CTGGCGTGGATCCGTACTGCACTAGGATTTCTGGCGGCGGGGGTTGGGCTTGATCAACTTGCGCCAGATTTCGCCACGCC
CGTCATCCGCGAACTGCTGGCGTTGTTGTTGTGTCTGTTTTCCGGCGGGTTAGCGATGTATGGCTACTTGCGCTGGTTAC
GCAATGAAAAAGCGATGCGCCTGAAAGAGGACCTGCCCTATACCAACAGCTTATTAATCATTAGCTTAATATTGATGGTC
GTGGCAGTGATCGTCATGGGACTGGTGTTGTATGCCGGATAGCCGCAAAGCCAGACGCATTGCCGACCCAGGGCTGCAGC
CGGAACGCACATCACTGGCGTGGTTTCGTACCATGCTGGGCTACGGCGCGTTGATGGCGTTGGCTATCAAACACAACTGG
CACCAGGCGGGCATGTTATTCTGGATTTCGATTGGCATCCTCGCCATTGTGGCGCTGATCCTCTGGCACTACACCCGTAA
TCGCAATTTAATGGATGTCACGAATAGCGATTTTTCCCAATTTCACGTAGTCCGTGACAAATTTTTGATCTCCCTCGCGG
TGTTATCTCTCGCAATACTGTTTGCTGTAACGCATATACATCAACTTATCGTATTTATTGAGAGAGTCGCATGACAGGAA
GTCAGGTCATTGATGCTGAAGAGGACAGGCATAAACTGGTTGTAGAGTATAAGGATGCTCTGCAACCTGCCGATTTTTAT
CACAATTTCAAACAGCTGGGCATCCGCTCAGTACAGCTTATTCCCCATCTTGAATTTGATGACCGGGGCGATCTGACGGC
CGCTTCGGTGACAGCAGAGCTGTGGGGGAAATTTTTAATTGCCCTGTTCGAGTGTTGGGTACGGGCAGATATCAGTCGTA
TTTCGATTGAGCTTTTTGACGCCACCCTACAAAAATGGTGTGGCAGCGAAAACCCGCAACCGCGTCGTGGCTGCCAGGCG
TGCGACTGGCATCGCCTGTGCCCGCACGCTCGGGAGGAGACGCCAGACAACGTGCTTTGTGCGGGCTATCAGGCGTTTTA
TTCTTACTCCGCGCCGCATATGCGGGTGATGCGTGATCTGATAAAGCAGCATCGTTCTCCCATGGAGCTGATGACGATGC
TGCGGTGACGTGAGCTTAAACAGGCTGCCCCTGATGCGACATCCGCGTCGCCAGCGGTAGCCAGCACAGCACGATCAACA
ATCCCATTAAGGTCATCAACAACCCCAGGCTGCCCTGACCGGTTTGCGGCAACATCGCAGAGAGCGACGCCAGCACGCCG
GAACCAATGTTTTGCAGACCGCCGACCAGCGCGCCAGCGGTGCCCGCCAGGAAGGGGAACGGCTCCATCGCGCCGCTGGT
AGCCAGTGGAAACAGCATCCCGGCACCGAAAAAGAACAGCGCGGCGGGAATGAGCAGCGTCCAGACATTCATCACGCCAA
ACCAGTCGGGGATCCACATCAGCAAGCCAGCCAGCAGGCAACAGATAACCGACTGCCACATCAACGTTGAGAAGCGTTTA
TTGGGACGTCCGGCAAACCATGCGCCAAAAAATGCCGCCGGAATCGGCAGAATAAACAAAATACTGACCGTCATACTGCT
CAGCCCTAACACCGCGCCCATCAGCACGCCGGAGCAGGCTTCAAAGGCGGCAATTCCGGCCAGACCGCCAATCAGCATCA
GCAAATAACAGTTAAAACCGCTGTTACCGAAAAGCGTTTTATAACTGGTAAGCAGGCGCGTGCGCGGTGCGTCGACCGGA
CGCGTTTCCGGCATCCAGCGGGCCATACTGAAAGTCACACCGGCACAAAGAACCAACAAAAAGAGATAACAGGCACGCCA
GTTCCACATCGTATCCAGCAGACCGCCGATTAGCGGTGCGAGCAACGGACTGACAAGAATCCCCATGTTTAACAGGCTGT
TAGCATGGCGCAACTGTGTCCGTTCATATAAATCGCGCGGCAAAGTACGCGCCATTACGCCGCCAACGCCGGTGCCCATC
CCCTGCATCGCGCTGGCGGCAATCAATACCGTCAAACTGGAGGTCGTGACCGCGACCAGCGTTGCCAGCATAAAAATGGA
CATTCCGACGAGGATCACCGGTCGGCGACCCACGCGGTCGGAAATCGGGCCATAAAACAGCTGTGAGACACCGTAAGTCA
GCAGATAAGCGCCCATTACGCTCTGCACCGCCCCTTCACGGACATTGAGATCGCGCGCCATATCGGCAATAGCTGGAATA
TAAATGGTTTGCGCCATCTGACCGACGGCCACGAGTAATACCAACATCAATAACAAATTGACGTTTCTATGCCTTTTCAT
TATCACGGATGCTTTTATAAAAATAATTAGAATAAGTCACTACGCATTCCCATAAATGCGGGAGAGGAATCTATCACATT
GATGAATGTTAGCCAGATATACGCCAGGAATGGGGAATTGTTTAGCGGCAGAATATGTAAACAAAAGCGGCAATAAATGT
TGCCGGAAACAGTGATGGTGCGGTTGGTAGGGTAAGGTGTTTACGCTGTATTCGACATGAATAAGGCGCACTCTGTCAAC
AATCTGACCGTCTTTCAGGTGATGATGCTTTATTGCCTGAGTTTCAGTTCAAAATGTGATCTGCCACGTATTTTTATCCG
GAAGAAAAATTTTCCATTGTCTCCCCTGTAAAGCTGTGCTTGTATAAATATTGTTAAACACAAAACCAACAAGGTCCCTA
ATGACTACTTCCATGTTCAACGCAAAACTACTACCAACTGCGCCATCTGCCGCAGTGGTCGTCGTGCGTGTGGTGGTGGT
CGTCGGCAATGCGCCGTAGGGACTGGAACAACACACGATTCCAAAACCCCGCCGGCGCAAACCGGGCGGGGTTTTTCGTT
TAAGCACCTCCCGGAAAGTCGGCCCAGAAGAAAAGGACTGGAGCATGGCAAGTTCGGGCACAACATCGACGCGTAAGCGC
TTTACCGGCGCAGAATTTATCGTTCATTTCCTGGAACAGCAGGGCATTAAGATTGTGACGGGCATTCCGGGCGGTTCTAT
CCTGCCTGTTTACGATGCCTTAAGCCAAAGCACGCAAATCCGCCATATTCTGGCTCGCCATGAACAGGGCGCGGGGTTTA
TCGCTCAGGGAATGGCGCGCACCGACGGTAAACCGGCGGTCTGTATGGCCTGTAGCGGACCGGGTGCGACTAACCTGGTG
ACCGCCATTGCCGATGCGAGGCTGGACTCCATCCCGCTGATTTGCATCACCGGTCAGGTTTCCGCCTCGATGATCGGCAC
CGACGCCTTCCAGGAAGTCGACACCTACGGCATCTCTATCCCCATCACCAAACACAACTATCTGGTCAGACATATCGAAG
AACTCCCGCAGGTCATGAGCGATGCCTTCCGTATTGCGCAATCAGGCCGCCCTGGCCCGGTGTGGATAGACATTCCTAAG
GATGTGCAAACGGCAGTTTTTGAGATTGAAACACAGCCCGCTATGGCAGAAAAAGCCGCCGCACCCGCCTTTAGCGAAGA
AAGTATTCGTGACGCGGCGGCGATGATTAACGCCGCCAAACGCCCGGTGCTTTATCTGGGTGGTGGTGTGATCAACGCGC
CTGCGCGAGTGCGTGAACTGGCGGAGAAAGCGCAACTGCCTACCACCATGACTTTAATGGCGCTGGGTATGTTGCCAAAA
GCGCATCCGCTGTCGCTGGGTATGCTGGGGATGCACGGTGTGCGCAGCACCAACTATATTTTGCAGGAGGCGGATCTGCT
GATTGTACTCGGTGCGCGTTTTGATGACCGGGCGATTGGCAAAACCGAGCAGTTCTGTCCGAATGCCAAAATTATTCATG
TCGATATCGACCGCGCAGAGCTGGGCAAAATCAAGCAACCGCATGTGGCAATTCAGGCGGATGTTGATGACGTGCTGGCG
CAGTTGATCCCGCTGGTGGAAGCGCAACCGCGTGCAGAGTGGCACCAGTTGGTGGCGGATTTGCAGCGTGAATTCCCGTG
TCCAATCCCGAAAGCGTGCGATCCATTAAGCCATTACGGCCTGATCAACGCCGTTGCCGCCTGTGTCGATGACAATGCGA
TTATCACCACCGACGTGGGTCAGCATCAGATGTGGACCGCGCAAGCCTATCCGCTCAATCGCCCACGCCAGTGGCTGACC
TCCGGCGGGCTGGGCACGATGGGTTTTGGCCTGCCTGCGGCGATTGGCGCGGCGCTGGCGAACCCGGATCGCAGAGTGTT
GTGCTTCTCCGGCGACGGCAGCCTGATGATGAATATTCAGGAGATGGCGACCGCCAGTGAAAATCAGCTGGATGTTAAAA
TCATTTTGATGAACAACGAAGCGCTGGGGCTGGTGCATCAGCAACAGAGTCTGTTCTACAAGCAGGGCGTTTTTGCCGCT
ACCTATCCGGGAAAAATCAACTTTATGCAGATTGCCGCCGGATTCGGCCTCGAAACCTGTGATTTGAATAACGAAACCGA
TCCGCAGGCTGCATTGCAGGAAATCATCAATCGCCCTGGTCCGGCGCTGATCCACGTGCGCATTGATGCCGAAGAAAAAG
TGTACCCGATGGTGCCGCCAGGTGCGGCGAATACTGAAATGGTGGGGGAATAAGCCATGCAAAACACAACTCATGACAAC
GTGATTCTCGAACTCACCGTTCGCAACCATCCGGGCGTAATGACCCACGTTTGTGGCCTTTTTGCCCGTCGCGCTTTTAA
CGTTGAAGGCATTCTCTGCCTGCCGATTCAGGACAGCGACAAAAGCCATATCTGGCTACTGGTCAATGACGACCAGCGTC
TGGAGCAGATGATAAGCCAAATCGATAAGCTGGAAGATGTGGTGAAAGTGCAGCGTAATCAGTCCGATCCGACAATGTTT
AACAAGATTGCGGTGTTTTTTCAGTAACCGCTCAAGGCTTGAACAACATCGCGCTTATCGTTAAGGTAAGCGCGTTTTAT
TACCCGCTAGGACAAGATCATGATCACCGTTGCCCTTATAGACGATCACCTTATCGTCCGCTCCGGCTTTGCGCAGCTGC
TGGGGCTGGAACCTGATTTGCAAGTAGTTGCCGAGTTTGGTTCGGGGCGCGAGGCGCTGGCGGGGTTGCCGGGGCGCGGT
GTGCAGGTGTGTATTTGCGATATCTCCATGCCCGATATCTCCGGTCTGGAGCTGCTAAGCCAGCTGCCGAAAGGTATGGC
GACGATTATGCTCTCTGTTCATGACAGTCCGGCGCTGGTTGAGCAGGCGCTTAACGCGGGGGCGCGCGGCTTTCTCTCCA
AGCGTTGTAGCCCTGACGAACTGATTGCTGCGGTGCATACGGTTGCCACGGGCGGCTGTTATCTGACGCCGGATATTGCC
ATTAAACTGGCATCCGGTCGTCAGGACCCGCTAACCAGACGTGAACGCCAGGTGGCGGAAAAACTGGCGCAAGGAATGGC
GGTGAAAGAGATTGCCGCCGAACTGGGCTTGTCACCGAAAACGGTACACGTCCATCGCGCCAATCTGATGGAAAAACTGG
GCGTCAGTAACGACGTTGAACTGGCGCGCCGTATGTTTGATGGCTGGTGATGAAGACGTTGTTCTCCCGCTTAATTACCG
TTATTGCCTGCTTTTTTATCTTCTCTGCCGCATGGTTTTGCCTGTGGAGTATCAGCCTGCACCTGGTTGAGCGCCCTGAT
ATGGCGGTGCTGTTATTTCCGTTTGGCCTGCGGCTAGGGCTAATGCTGCAATGCCCGCGCGGATACTGGCCGGTGCTACT
GGGTGCGGAGTGGCTGCTGATTTACTGGCTAATGCAGGCGGTCGGTTTAACCCATTTCTCCTTATTGATGATCGGTAGTT
TACTGACGTTATTGCCCGTGGCGCTGATCTCGCGCTATCGCCATCAACGTGACTGGCGCACCTTGCTGTTACAGGGTGCG
GCGTTAACGGCGGCGGCGTTGTTGCAGTCGCTGCCCTGGCTTTGGCACGGCAAAGAGTCGTGGAATGCGCTGCTGCTGAC
TTTAACTGGCGGCCTGACGCTGGCCCCGATATGTCTGGTGTTCTGGCACTATCTCGCCAATAACACCTGGCTGCCGCTCG
GCCCGTCACTGGTTTCTCAACCAATCAACTGGCGCGGGCGACATCTGGTCTGGTACTTGCTGCTGTTTGTTATCAGTCTC
TGGCTCCAGTTGGGATTGCCAGACGAACTGTCGCGCTTTACGCCATTCTGTCTGGCGCTGCCGATTATCGCGCTGGCCTG
GTACTATGGTTGGCAAGGAGCGCTGATTGCGACATTGATGAACGCCATCGCGCTGATCGCCAGTCAAACCTGGCGCGATC
ATCCGGTGGATTTATTGCTCTCGCTGCTGGTGCAAAGTCTGACAGGGTTGTTACTGGGCGCAGGCATCCAGCGGTTGCGT
GAACTTAACCAGTCGCTGCAAAAAGAACTGGCGCGCAATCAGCATCTGGCTGAACGTTTGTTAGAAACTGAAGAGAGCGT
GCGCCGTGATGTGGCGCGTGAGCTGCACGATGATATCGGCCAGACTATCACTGCCATTCGTACTCAGGCGGGCATTGTCC
AGCGGCTGGCGGCAGATAACGCCAGTGTGAAGCAGAGCGGGCAGCTCATCGAACAACTATCGCTGGGCGTTTACGACGCG
GTGCGCCGTTTGTTAGGTCGGTTACGTCCGCGCCAGTTGGATGATCTCACCCTGGAGCAGGCCATCCGCTCACTGATGCG
GGAAATGGAGCTGGAAGGGCGCGGCATTGTCAGCTATCTCGAATGGCGAATCGATGAGTCCGCGTTAAGTGAAAACCAGC
GTGTGACGCTGTTTCGTGTCTGCCAGGAAGGGCTGAACAACATTGTGAAACATGCCGATGCCAGCGCGGTCACCCTGCAA
GGCTGGCAGCAGGATGAACGGTTGATGCTGGTAATTGAAGACGATGGCAGCGGTTTGCCGCCGGGATCCGGGCAACAAGG
TTTTGGCCTCACCGGAATGCGCGAGCGCGTAACGGCGCTGGGCGGCACATTACACATTTCCTGCCTGCATGGCACGCGTG
TCAGCGTTTCTCTACCTCAACGCTATGTCTAAGGTTCGATGATGTTGCCGTTTCTGAAAGCGCCTGCCGATGCGCCATTA
ATGACTGATAAATATGAAATTGATGCCCGCTATCGTTACTGGCGTCGGCATATTCTGCTGACCATCTGGCTGGGTTACGC
GCTGTTTTACTTCACGCGGAAAAGTTTTAACGCCGCCGTACCAGAAATCCTTGCTAACGGCGTGCTCAGCCGTAGCGATA
TCGGCCTGTTAGCGACCCTGTTTTACATTACTTACGGCGTGTCGAAGTTTGTCTCCGGCATTGTCAGCGATCGCTCAAAT
GCCCGTTATTTTATGGGGATAGGGCTTATCGCCACGGGCATCATCAACATTCTGTTTGGCTTCTCGACGTCGCTATGGGC
GTTTGCCGTGCTCTGGGTGCTGAACGCCTTTTTCCAGGGCTGGGGTTCACCGGTGTGTGCGCGTCTGTTAACGGCCTGGT
ATTCTCGTACCGAGCGCGGTGGTTGGTGGGCATTATGGAACACGGCGCATAACGTTGGCGGCGCACTCATTCCCATTGTG
ATGGCAGCAGCTGCGCTGCATTACGGCTGGCGTGCCGGGATGATGATTGCGGGTTGTATGGCGATCGTCGTGGGGATTTT
TCTCTGCTGGCGGCTGCGCGATCGTCCGCAGGCGTTAGGTTTACCTGCGGTTGGTGAATGGCGGCACGATGCGCTGGAGA
TTGCTCAACAACAAGAAGGGGCAGGGCTGACGCGTAAAGAGATCCTCACCAAGTATGTGTTGTTGAATCCGTATATCTGG
CTGCTTTCGTTTTGCTATGTGCTGGTCTATGTGGTTCGGGCGGCGATCAACGACTGGGGCAATTTGTATATGTCCGAGAC
GCTGGGCGTCGATCTGGTCACGGCGAATACAGCAGTGACGATGTTTGAACTGGGCGGATTTATCGGTGCGCTGGTAGCGG
GTTGGGGCTCGGACAAACTGTTTAACGGCAACCGCGGGCCGATGAATTTGATTTTCGCTGCCGGAATTTTGCTTTCAGTC
GGCTCGCTGTGGCTGATGCCATTTGCCAGCTACGTGATGCAGGCAACCTGCTTCTTCACCATTGGTTTTTTTGTCTTTGG
CCCGCAGATGTTAATCGGTATGGCGGCGGCAGAGTGTTCCCACAAAGAGGCGGCAGGGGCGGCGACGGGATTTGTCGGCT
TGTTTGCTTATCTGGGGGCGTCGCTTGCTGGTTGGCCGCTGGCGAAAGTGCTCGATACCTGGCACTGGAGCGGATTTTTT
GTGGTTATCGCCATTGCCGCCGGGGTTTCCGCACTGCTGTTACTGCCCTTTTTGAACGCCCAGACACCGCGAGAAGCGTG
ATGCATCTCACCTTTTCACTTCATATCCGGCAAAACTAAGAAATTTTCCAGGTTTTGCCTGGACGCTATCTCAGGCCTGA
TTTGCTGCTGATTTTTACAATGCCATCATTCATTAATTCTTTCCCAAAATAATTCAAGTTGCAGGAACGCAGCAAACGCG
TGAGTCCCGGGAGCATAGTGAACTATGTGACCGGGAGGAATGCGTGCAGCTAAGGCACCTGCGGCTTGAAGTATGAAGGG
AAATCAGGAGTAACCCATGCTGGCTTTCCTAAACCAGGTTCGCAAGCCGACCCTGGACCTTCCGCTCGAAGTGCGGCGCA
AAATGTGGTTCAAACCGTTCATGCAATCCTACCTGGTGGTCTTTATCGGCTACCTTACGATGTACCTGATTCGCAAGAAC
TTTAACATCGCGCAGAACGACATGATCTCGACCTACGGGTTGAGCATGACGCAGCTGGGGATGATCGGCCTGGGCTTCTC
CATCACTTATGGCGTGGGTAAAACGCTGGTTTCTTACTACGCCGACGGCAAAAACACCAAACAATTCCTGCCGTTCATGC
TGATCCTGTCTGCCATTTGTATGCTGGGCTTCAGCGCCAGTATGGGCAGCGGCTCGGTTAGCCTGTTCCTGATGATTGCC
TTCTACGCCTTAAGCGGCTTTTTCCAGAGTACCGGCGGTTCGTGCAGTTACTCCACCATCACCAAATGGACGCCGCGTCG
TAAACGCGGGACATTCCTCGGTTTCTGGAACATTTCTCACAACCTTGGTGGTGCAGGCGCAGCAGGTGTGGCGCTGTTCG
GCGCAAATTACCTGTTCGATGGTCATGTCATCGGCATGTTTATTTTCCCGTCGATTATCGCGCTGATTGTTGGTTTTATC
GGTCTGCGTTACGGCAGCGACTCCCCGGAATCTTATGGCCTCGGCAAAGCTGAAGAGCTGTTTGGCGAGGAGATCAGTGA
AGAGGATAAAGAGACAGAATCTACCGATATGACCAAGTGGCAGATCTTTGTTGAGTATGTGCTGAAAAACAAAGTGATCT
GGCTGCTGTGCTTTGCCAACATTTTCCTCTATGTGGTGCGTATTGGTATCGACCAGTGGTCAACCGTGTATGCGTTCCAG
GAACTGAAACTCTCTAAAGCGGTGGCGATTCAGGGCTTTACGCTGTTTGAAGCTGGTGCGCTGGTCGGTACGCTGCTGTG
GGGCTGGCTCTCTGACCTGGCGAACGGTCGCCGTGGCCTGGTGGCCTGTATCGCGCTGGCGCTGATTATCGCCACGCTCG
GTGTGTATCAACACGCCAGCAACGAATATATCTACCTGGCTTCTCTCTTTGCGTTGGGTTTCCTGGTCTTTGGCCCGCAA
TTGTTGATTGGCGTGGCGGCTGTTGGCTTTGTACCTAAAAAAGCGATTGGCGCTGCCGATGGTATTAAAGGCACCTTCGC
TTACCTGATTGGTGACAGCTTTGCCAAGTTAGGGCTGGGGATGATTGCCGATGGTACGCCGGTATTCGGCCTTACCGGCT
GGGCAGGCACCTTCGCCGCGCTGGATATCGCCGCGATTGGTTGTATCTGCCTGATGGCGATAGTGGCGGTGATGGAAGAA
CGCAAAATCCGTCGCGAGAAAAAAATTCAGCAGTTGACAGTGGCATAAACGTAACTGGTGACTTTTGCCCGGCATGACGC
CGGGCTTTTTTTATTATTCCGTGAATTCCAGCGTAGTGAAGGCAAACTTCTCGCCATCAAACAGCCCCTGACTGGTTAGT
TTCAGCGCGGGGATCACTGGCAGGGAAAGAAACGCCATCTGAATAAACGGCTCATCCGGTAACGGACCGCATTCACGGGC
GGCGGCTTTCAAGGCGTCAATTTGCTCCGCCAGTGACTGAGCCGTGTCGGTGCTCATTAGCCCGGCAATGGGCAACGGTA
GATGACTTTGTACCTGGCCGTTACGGACCACGCACAGCCCGCCGCCATCCTGAATCACCTGATTGACCGCCAGCGCCATT
TCTTCTGCGCTACGACCGATCACCACAATATTATGGCTGTCATGGCTGACCGTCGCCGCCAGCGCACCTTCATTCAGGCC
AAAGCCGCCGAGCAAACCACAGGCCGGAGCCAGTCGTTGTCCGTAACGCTCAAGAACGGCAATAAAGCACACATCATCGC
GATCAAAACCGTTTTCGCTGTAGACGCTGGAGCGGGAGTGCGTGATCAGTTCGTTATGGATTACCTCAATAACGCGATAG
CGTTTTCCGGGGGTAAATTGCAGGGCAAAGTCGCTGGCGGAAACTGGCTGGCGATCAATGGTATTGCCATATGGCGGGGC
GGATTGTGCCAGTCTCGCCGACTCTTCCGCCTGTAAGGTTTGTGCATCGATCGGCTCGCCTTTCACCAGTACCTGCTGCA
CCGTGACCTTACGCGCATCGCTCAACAGGACGATATCGGCCTGCTTGCCGGGTGCCAGTAAGCCGAGGTGATTCAGACCA
AAATGGCGCGCCGTCGACCAGCTGGCTACGCGATATGCCACATGCAGCGGTACATTGTGTTGTTCGATCAGGCGGCGAAT
TAAGGCATCGATGTGTCCTTCATGGGCGATCTCCCACGGGTTACGGTCATCGGTACAGAGCATGCATTGCGGGCTGTTAA
ATTCGTTGATCAACGGTGCCAGCGCGTTGAGATTGCGGGCTGCGGACCCTTCACGGATCATCAATGACATGCCGAGTTGC
AATTTCCGGCGTCCTTCTTCCAACTGATAACTTTCGTGGCAGTTTTCAATACCCGCAGCAATATAGGCGTTAAGTTCTTT
ACCACCCAAACCCGGGCAGTGACCGTCCAGTGTCAGGTGGCGAAATGCGTCCAGTTTATCGAGCAGCGCATTCTGCCCGC
TAATTACGCCAGGGTAGTCCATCATTTCTGCAAGGCCGGTAACCTGCGGATGGTCCCGCCAGGCGAGCATCTGTTCAAGG
GTAAAACTGGCACCGTTAACATCGCAGCCTTTTCCAGGGCGGGTACGCAAGAGCTGACCTGTAAGTACTGGTTTTGCCTT
GCCTGTTCGGCACAGCGGGCAAACCAGGCGAATCCGGCTTCTCCCATCACGTTGACGATTTCATGAGGGTCGCAAATAAC
GGTCGTCAGGCCGCGCGGCAGGGTCGCGGTTTCAAAAGTGACTGGCGTCATCATGCTGGATTCAATATGCAGGTGAGCAT
CAATAAACCCTGGCACCGCCGTTGCGCCGCGGGCATCAATCCGCTGCAAAGCCGGAGCATCAGCGTATTCTGCGCCAACA
CCGGCAATGTAACGTCCTTTAATCACAATTGGGCCGGAAATTTCTCCGCCATTGATCAGGTCGAGAATAGAGACATTATC
AATAATATAATCGGCAACAGCGTCTCCACGGGAAACGGCTAACAATTCCTGGTATTCAGCCCGGCTAATGTGATGAAATT
TATGGTTAATAGAATTATTCATATTTTTTCTCATTTTGATTTTATCAATTTGATTATTATTTATCATAAAGAAATATCGC
GAGATTATTAAAGAATATCCATTAATGTGCAATTGAAATGTGATAATTATCACTGAACCGTTGTTGTCATTTGTTTTACA
AAAGCAAGGGATTAAATCTCCTCCAATGGACAAAAAAATGAATAATGACAATACCGATTACGTGAGTAATGAATCAGGGA
CGCTTTCGCGATTATTTAAACTACCTCAGCATGGGACCACCGTCCGCACAGAATTGATTGCGGGGATGACCACTTTTTTA
ACCATGGTGTACATCGTTTTTGTGAACCCGCAAATCCTCGGCGCGGCACAAATGGACCCAAAAGTGGTGTTTGTTACCAC
CTGTTTGATTGCCGGTATCGGCAGTATTGCGATGGGGATATTTGCTAACTTACCCGTGGCACTGGCTCCGGCAATGGACC
TGAACGCCTTCTTTGCCTTCGTGGTCGTGGGGGCGATGGGTATCTCCTGGCAGACCGGGATGGGCGCGATATTCTGGGGC
GCAGTTGGGCTATTTTTGCTCACGCTGTTTCGTATCCGGTACTGGATGATCTCCAACATTCCATTAAGTTTACGTATTGG
TATCACCAGCGGGATCGGATTATTTATCGCCTTAATGGGATTAAAAAACACTGGCGTTATTGTCGCCAATAAAGACACAC
TGGTGATGATTGGCGATTTAAGTTCTCACGGCGTGTTGTTAGGTATTTTAGGTTTTTTTATTATAACCGTGTTGTCATCA
CGTCATTTTCATGCCGCGGTGCTTGTTTCTATTGTGGTGACGTCTTGCTGTGGATTATTTTTCGGTGATGTTCATTTTAG
CGGTGTCTATTCCATTCCGCCTGATATTAGCGGCGTCATTGGTGAAGTGGATTTGAGCGGTGCGTTATCACTTGAACTCG
CCGGTATCATTTTCTCCTTTATGCTGATCAACTTATTTGATTCATCAGGAACATTAATTGGTGTGACTGATAAAGCTGGC
TTAATAGATAGTAACGGTAAATTCCCCAATATGAATAAGGCGCTGTATGTTGATAGCGTCAGTTCGGTGGCGGGTGCGTT
TATCGGTACCTCGTCTGTTACCGCTTATATTGAAAGTACTTCAGGTGTGGCTGTCGGTGGTCGCACGGGGCTGACGGCTG
TCGTAGTCGGCGTTATGTTCCTGTTAGTTATGTTCTTCTCACCGCTGGTGGCGATGGTTCCTCCTTACGCAACCGCCGGA
GCGTTAATCTTTGTTGGCGTGCTGATGACTTCAAGCCTGGCGCGCGTTAACTGGGATGATTTTACCGAATCGGTGCCTGC
GTTTATTACCACGGTGATGATGCCCTTTACTTTCTCGATCACCGAAGGGATTGCACTAGGCTTTATGTCGTACTGCATCA
TGAAAGTGTGCACCGGGCGCTGGCGCGATCTGAACCTGTGTGTGGTGGTGGTCGCAACTCTGTTTGCACTGAAGATTATT
CTGGTGGATTAGTAACTGGCGAGGGTTTCCAGATATCATGAGTTCTGATTACGCAGGAGAACTCATGATCTGGATAATGC
TCGCCACGCTGGCGGTAGTGTTTGTGGTTGGTTTTCGGGTGCTGACATCCGGGGCCAGAAAAGCGATTCGCCGTCTCAGC
GATCGGCTGAACATCGATGTCGTACCCGTGGAGTCGATGGTCGATCAAATGGGAAAGTCAGCCGGTGACGAATTTTTACG
TTATTTGCATCGCCCGGATGAGTCGCACCTGCAAAACGCCGCGCAGGTGTTGCTCATCTGGCAAATTGTCATTGTCGATG
GTAGCGAACAGAACCTGCTGCAATGGCATCGGATTTTACAAAAAGCCCGCCTTGCCGCGCCGATTACCGATGCTCAGGTC
AGGCTGGCGCTGGGTTTTCTGCGCGAAACCGAACCTGAAATGCAGGATATCAATGCTTTTCAGATGCGCTATAACGCGTT
CTTTCAGCCTGCCGAGGGCGTTCACTGGCTGCATTAAAACCGCTTCGTCTTATCAGCCTACAGACCGCGCCTGACCTGGT
GGGTGGATAAGACGTTCACACCGCATCCGGTAATCTTTGCCCTGTTCCGTTTCGATCTTAACTCCAGCTCAAGCAACACC
GTAAAAGTTGCAAAAACGTTAAATACGTCACACATTTCAATGTTAAAGTGGTCGGCTTTCCCTCTGAAACATGCCACGGG
TAACACCATGAGTGAATTTATTGCTGAAAACCGCGGCGCGGATGCCATCACCCGACCGAACTGGTCAGCCGTTTTCTCAG
TGGCGTTTTGCGTCGCCTGTCTGATTATCGTTGAGTTTTTGCCTGTCAGTTTGTTGACGCCAATGGCCCAGGATTTAGGC
ATTTCGGAAGGGGTTGCCGGCCAATCGGTGACCGTAACCGCCTTTGTGGCGATGTTTGCTAGTTTGTTTATTACCCAGAC
CATTCAGGCCACTGACCGCCGCTACGTTGTCATTCTGTTCGCCGTTTTGCTGACGCTTTCCTGTTTGCTGGTTTCCTTTG
CCAACTCATTCAGTCTGCTGTTAATCGGTCGCGCCTGTCTGGGGCTGGCGCTGGGCGGGTTCTGGGCGATATCGGCGTCG
CTGACCATGCGTCTGGTACCGCCGCGTACGGTGCCGAAGGCGCTGTCGGTGATCTTCGGCGCGGTTTCTATTGCGCTGGT
GATTGCTGCGCCGTTGGGCGGTTTTTTAGGCGAGCTTATCGGTTGGCGCAATGTCTTTAATGCGGCGGCGGCGATGGGTG
TGCTGTGTATTTTCTGGATTATCAAATCACTGCCTTCGCTGCCAGGTGAACCTTCGCATCAGAAACAAAATACTTTCCGC
TTATTACAACGTCCGGGAGTGATGGCCGGGATGATCGCCATCTTTATGTCCTTTGCCGGACAGTTTGCTTTTTTCACTTA
TATTCGCCCAGTGTATATGAATCTGGCGGGATTCGGTGTTGATGGCTTAACCCTGGTGCTGCTGAGTTTTGGTATCGCCA
GCTTTGTCGGGACATCGCTTTCGTCGTTTATTCTCAAACGTTCGGTGAAACTGGCCTTAGCGGGCGCACCGTTTGTGCTC
GCCCTGAGCGCGCTGGTACTGACGCTGTGGGGAAGCGATAAAATTGTTGCTACTGGTGTGGCGATTATCTGGGGGCTGAC
CTTTGCTTTAATTCCCGTTGGCTGGTCAACGTGGATCACTCGCTCACTGGCCGATCAGGCAGAAAAAGCCGGATCTATTC
AGGTGGCCGTTATTCAGCTTGCCAATACCTGCGGTGCGGCAATCGGCGGTTATGCGTTGGATAACATTGGTCTGACTTCG
CCGCTGATGTTGTCCGGCACATTGATGTTGCTGACTGCATTGTTGGTAACTGCAAAGGTGAAAATGAAGAAATCCTGATA
TCAGGTAAAGAAGCGTTGGTCAGTGGTTGTTGCCGTTCTTACATATCCGGGCATTCTACCTTACCCAACGCTTCCCAATA
ATTGCTCTGATTATTACGTTCCATCGCCACGATGGCCTCGCGTATATGTTGTTTATTGTTTTCATCTGACAACATTAACT
TTTCCCACGCTTCATCGGATAATGACGCCTGTGGCGTGCAAATTTTACGTAAATCTTGCAATACCGTGGTTTTCTCTTTT
GCCGACTGTAGAGAACTGAATGGCGACTCGGCCTGAGAAATGGCTGGAAAAATCAGGAATACGGTAATCATGAGTAGCAT
CGTTGGCTTCATAGCGGCAACCTTCTGCAAATGTGCATCGAATGAAGCATAAGTGTAGTTTGCTTTTGCCGCTCTCATCA
TGCTGTACGAAAGGTGTTTGCGTGGTCAGTAAGAAGTGCCAGACTTTATATTCCACTTTTATTCCTTTTTATTCTTATCG
ATAGCGTTTTGTTTTTTAAACTGCAGCGACCTTACCGCTATAGTCCGGTAATCATTAATAAAAGGATAAAAAAATGAAAC
TGACAACACATCATCTACGGGCGGGGGCCGCATTATTACTGGCAGGAGTTCTGCTGGCAGGTTGCGACCAGAGCAGCAGC
GATGAAAAGCATATTAAAGTTGGCGTTATTAATGGCGCAGAACAAGATGTCGCGGAAGTCGCTAAAAAGGTAGCAAAAGA
GAAATATGGCCTCGATGTTGAACTGGTAGGATTTAGCGGTTCGTTGCTACCGAACGATGCGACAAATCATGGCGAGCTTG
ATGCGAACGTCTTCCAGCATCGACCCTTTCTTGAACAAGATAATCAGACGCATGGTTATAAACTGGTAGCGGTGGGAAAT
ACGTTTGTCTTCCCCATGGCGGGCTATTCCAAAAAAATCAAAACCGTGGCGCAAATAAAAGAAGGTGCGACAGTGGCGAT
CCCCAACGACCCGACTAACCTTGGTCGCGCGCTTTTACTGCTGCAAAAAGAGAAGCTAATTACTCTGAAAGAGGGAAAAG
GGTTATTACCTACCGCGTTGGATATAACCGATAATCCACGCCATTTGCAGATAATGGAGCTGGAAGGGGCACAGTTGCCA
CGTGTACTGGACGACCCGAAAGTGGATGTAGCGATTATCAGCACCACTTACATCCAGCAAACAGGACTTTCTCCGGTTAA
CGACAGCGTATTTATTGAAGATAAAAATTCGCCGTATGTGAATATTCTGGTGGCACGGGAAGATAATAAGAATGCAGAAA
ACGTGAAGGAATTTCTGCAATCTTATCAATCACCCGAAGTCGCTAAAGCGGCAGAAACCATCTTTAACGGTGGCGCGGTG
CCTGGCTGGTAATTCTCACTCATGCCGCGCCGGACGATTTATTTTTCTGGCGCGGCGGCGGGAATCCATTGAAATCAAAA
TCACCGATGACAGAATCAGCAGCGTTCCCAGCCAGTCCGGCAATGTGAAGGTGATCCCCAGCAACAGCAAAGAGAGCAGC
GCGCTACTTAATGGTTCAGCACAGCTTAAAATGCTGGCTTTTGGACCGCCAATTAATTGTGCTCCTTTTAGGTACAGACT
AAATGTCAGGGACGTACCAATGACCACCAAATAAAAAAACGCCAGAATCAAACTTCCGTTAACGACAAAATTTGTCCCTT
GTCCGGCATAAAAGGGCAGCAAGATCAGACCGCCAATGAGCATACTCCAGCCGACGACCGGTAACGTGCCATAGCGGGCA
ATCAGCATTGAGGGATAGGTGGTATAGAATGCAGCAGCAAATGCCGAGGCAATGCCCCAGAATAACGCGGCAGGAGAGAT
CGATAATGACGTCGGATTACCGTGTGTCACCAATAAAAAAGTCCCGATCAGAGATGTCAAAATAGCGCAGAAAACCAGAA
TGCCCGGGCGGGATTTACGCACCAGTGAGAACCAGGCGACGATAATAGTCGGTGAGAGGAATTGCAGCACCGTTGCCGTG
GCTGCGTTCGATTTTTCGATGGTTAGCAAAAAAGTGAGCTGTACGGTTAGCGCGCCAACCACGGAAAAAATCAGTAGGCT
AATGGCATCTTTGTGATTGTTAATAATAGAAAAGATTTTATCACCATGAACAAATGATAGCGTCAGCAGAATCAAACCGG
CGAATATCAAACGCGTCATAGTCAAAAACTGCGACGACATCTGGCTTTGCTCCATGATGTATTGCGCGCAGACCCCTGAA
CTTCCCCACAACACGGCGGCAATCAGAACGTTCAGCATCCCCTTTCTGGTGGAACCCATTTTTCCCTCTGCATACTGTTT
TGTCGTTTATGTATGCAGGCATGATAGCAAAAATGGCGAGGATGGCTCAGTTTGCGCCACGCCGATTTTTCTTAGCCCAG
ACTGGTGAGCTAAATATCTTTAATAAACAGCAAGCAAATCATTGCAATACCCAACATCCCTATCGCCAGCCAGAACAACG
TGTGGTAGCTCCAGATTTCAACCATAATTTCGTCAACAGAGCCGGCGATAATCTAGCCGAAGCGTGAGGTATTTGCATAT
AACGTTGTTGCGGAACCTATTCTTATTTATCGGAGTGCCTTGCCAGTAATTTACTGACGAGGATCCTCATAATAGCGTTA
CCCATCTGTTGCATTGAGCCTTTACAGGCCGTTATTCTAAATGACCAAAATTAAATCAGTGCATAAGGGGAAGTATTCTG
TAGTGATGTCTCCCTGAGATGCAGGTTCCACTGGAGAAAATTATGAGCAGTTTGTTTCAGAATGAAATAAAGGATAAATT
TAAAACTGGACTTGCATATGTGCGGGGGCCAGAAAAAAGCGGATCTTCCGCTCAAAATGCAGGTAGCGAAGGTGGTAAAA
ATGCGCCGGGAGAAGCAGAAGATTGTCCCGCGATGTCCGTTTGAGAAACACGAGTTTGATTAAACGCGTGAGCATGATGA
TATTAGTAGCTGACCAGAGAAATTATATCCGTCGTAAGCAATAAAAATCAGAAGTGATGTTATGGATATTTTTAACCTGA
ATAACTCCGTAAGTACGGGGTTATTCAGGTTTTTGCTAGCCTGTGCTTTTCTATACCAGATGTGGTGTGAACACTCTATT
CTGCATACAAATTAAATATATTGTAGGATCTAATATAAGTCTGATAATCCTAATAGACTGAGTAAGATTCTGGTTGATAA
TAGCTGATGTCCTTTTCAGCTATTAATGTGTTTATTTAGCGTGAAATTATACTCGTATTTTTATAACTTTATGAGATTGC
CAGATTTGGTCGATAAATAATAAGGCCAGTGACAGACTTACTTATTAGGGACAAATTTCGCGAGGATATCAGGTTCACTG
GCAACATAAATGCTTTCATCAGGCAGAGTTACAATTCCTTCAGGTTGGGGCAAATCACTGGTCAGAGAATGATTTCCTTT
TGTCAGGTCAAGCATCTCAATGAAAGACATCTCTGTCAGGTTAAACTTGAGTAATTTACGCGATTCATCGGACAGAATCA
TCAGACTTTCATTATTAAAGGCCAGGCCGGATATATCGTTAACACGTATATCATTTAGTGCCTCTGGAATAGTTGCTTGC
TTTACACTCAGCAGGTCTGAAGAAAGTTGATATATAAATATTTTACTTGGGCGTCTTTCTTTTGCGACAAACAGCATCCG
ATCATCTGCTTTCCATGCCAGCCCTTCAAACCCTCTATTCTTTTTATTGAATTTTTCTAACTGAATTTTATTTCGAAAGG
AGATATGCATATCTTTTGTAACTGTAAAAAAGAATAGTTCAGAAGTCTTTTCGTCTACTGCAGCAAAAATGTTCCCTTGT
ATGTGTTCAATTGTTTCAGCATCAGAGATAAAAGGCAGCGGGGCTCTGTCCATGATGTCGCCACTTTTGGTTATTTTAAG
TAGCTGTGCAGGGCTATTCTGGGTGGCATACAGGAAATCATCCTCTTTATTATAAGTAAGAGATGATAAGTTCACCGTAT
TTGGTAATTGTTTTATAAATGAAAGTGAGTGTTCTTGAGGTGATTTTTTGTAAGTACAATTAAATGGAAATAATATTAAT
ATGGTTAGCATAATAAATATCGCAATGAAAAATGCAATTAATGGTTTTCTTTTCATTTTCTCTATTTACTGTAAATTGTT
TGCAGAACAAATATTTTTGTTTGATTGTAATTAACTTCAGGATAAATTGTTAATAATTGTGGGTGTGATTTCTATTATTG
GTTTTGATTAATAAAGTTTTATTTTAAGTGTTTTGTAAGTACGTTTCAGATGCGGCATACCTTGGTTGTAGCGCTCTTAC
CATTTCATCGATTGTACATTTCACACCTTGCGGCACTTCATAAGAAGTCCTGTTCGTCAACATGCCCATCTCGTTGGGGC
GGTCTTCTGGCGCCATTATCAGAACCCCGGTATGGCTGGTAACATAAATGTTTCCATCTGATGATTGAGAGATACTGATG
TTAATGCAAGCGTTAGGTGTATCTAACGATCTTTCCGCATTGTATTCACTGGCTTTAGAGATCCTTTCATGTGTCAACGT
TAAGGCTGGCACATTGAAAGATTGATAGAAAGCCGAGCATATGGCCGTTGCTGCTTCTGGATGGCATAAAAATTCCACAA
CTTCAGCTTTCTGATTATCGCTGCCGCTGCTTTCTCTTGCTATTTGCTCTGCATCATGGCGAGAAATACCATGATCTATA
ACATTCCGGGAAGGTGATGAGTGTGTGTCTTTAAGTCCTAGTGCATCGCGAAGCAACATTTGTGCATTTGCAGGTATATC
AACACCATTGAGTGAAAGCTTTGCATTGCCGAGTCCTCGACATGTATCCATAAAGATAGAGCTGAATGGTGTAGGCCCGG
AAAGCGGATCTGTTTGAGCATTATGAGGAATCAAGGTTGTTGATAGTTTTGACGTAAAACCAAGTAGATTGCGCATTGAG
GTAGTATCAGTCAGGTCCATCTCAGATAAGGCACGATGAACCTGAATGTATGGCATGTGGCGATCGATGGGTAAAGATTG
TAATAACCTATTTTGTTCGTTTGACTCCAGGAGCACAGTAATCTTTTCATTATCTGGTGTGCGAATCTCGGCTTCAATAC
TTTCGCTGTTAGTGACGGAAATTCTTAAGGATGAGCCATCTGAAAAACGAGCAGATACTCTGCCTAATTCATTGGGAAGT
GGATATACAGGCTCTAAAACGGTTAACAACTCTTGAAATGATTGTCTTTCACTACGACTGTACGTTGGATTCCATAAACC
AAAACTAAGTACTTTAAGTAACTTTTCAGCGCATGACATCTCATCCCAGCTTTTTTTAAACCCAGAATTAACTTTCATTG
CAGCATCTAAAACTAAAGATGCGGAGTCATTATTAAGTCCATTTATCATGAGAGATTCTCCTATCTGGTTTGTAATGAAC
AATTTGGCAACAAGTATCATATAGCATCATATAGTGTCAATAATATACAAGATATTTATAGCGGGTGTTTTAAACGCATA
GAAAGTTATTTTTACCTTCTGAAAAATAAGTGAAAATATTAATCTAATGATGGATAATTGATTGCAAGTGATGCGTCAGC
CATAGTTTTTGTGTCTATGAAAAGGTTGTACTTATTTACATAAGTAATAGAATTTAGATAATTTTTTATTGTGACGATAA
AATATACCATTAATGATTGATTTAGAGATACTGGCTTTCAGGAAACTTATTTTGGCCTGTATATAATGTGATGATTACTA
AAGTGGTACATTGATATCAGTTAGCTTTCCCTTTTCAAGTTGCCTTATCAAAGAATTCTCTTTATAGAGGGGCGCATTGT
TCTGATTAACATAAACCTGTTGTGGCATTACACCGATCGATAGGTGCGACAAAGAACAGGGTTAATGAATTTGTAACCAG
TCCCACCTTAGCGCTATGCACTTTTGAATCACAGATCTTGCTAATCGTTTGTCCGACTTTAACAGAGTTAATGACGGCGA
TGATCTGATGCCAAGTAAAACGGACTTGATGTATGGCAGATCCTCTTTCGCCGAATGGATATGGGCAATACTTCTTAATA
CGAATGGTACGGTTATGCGGGAAGAGACTAACGCGGTTACTTGTTCAGCTATTTGTCCCTTGTTCCTTTTTATAATGCAC
CCGTTCCAGGTTAGTGCTGGCTGTAGCTTATGTCCGGGAGACAGCTAATAGATATATATACTCGTCATACTTCAAGTTGC
ATGTGCTGCGACTGCGTTCGCTTACCCCAATCACTTACTTATGTAAGCTCCTGGGGATTCACTCGCTTGCCGCCTTCCTG
TAACTCGAATTAAGTAGAGTATAGTGAAACGGTTCAGCTTGGTTTTTATTCTGTTTTATTTGTTTATGCAATGAGATCTA
TCTTATAAAGAGAAACGCTTAACTAAATGGAAATGCAATTATTAAAGTCGTTTGTTAACGAGATGGTTTTCTTCTATATC
ATTGATTTTAAATGGATTTTAAAAATATATGATTTTTTTTGTTGACATTTAATGATAATGTATTTTACACATTAGAAAAC
AGAGAATAATAACATTTTAAGGTGGTTGTTTGATGAAATAGATGTGTCCTAATTTGATAGATAAACGTTATCTCACATAA
TTTATATCATTTGATTAATTGTTGTCCTTCCTGATAAGGATAAGGTCGCTAATAGCTTAAAATATTAAAGCATGCGGAGA
TTATTTATTATGAATATGGAAACTAATTCACATACAACAAGTCCATACATTCAGCTTATAGAGCAAATTGCAGTTCTACA
GCAGGAAGCAAAGCGACTGCGAGAGCAGGAAGTTCAAAGTGTAATTGAGTCGATTCAGAAGCAGATTACTTATTACAATA
TAACCTTACAAGAGCTGGGATATACTAATGTGCCTGATGATGGACTCGCTCGCCGGAACTCATCGAAAGGTGTTTACTAC
CGCAATGAAGAAGGGCAGACCTGGTCGGGCGTAGGCCGACAGCCACGCTGGCTTAAAGAAGCACTGTTGAATGGAATGAA
GAAAGAAGATTTTCTTGTGAAGGACACTGAAGAAGAAATAATACCGCTGAAAAATATTTAACATAAAATAATTAAATGAT
AACGATAACTGAGCTGGAAGACGAAATAATAAAAAATAAAGAAGCCGCAAATGTTTTTATTGAAAAAATAAACGACAAAA
AGAACGAAATCCATGAAAAAATGAAACACCCTTTGGATAAAGTTACCTACAATGAAGCAAAGGAACTGCTCATTGCGTGT
GATGCGGCAATTAGGACTATAGAGATAATGCGAATCAGGATTAATAATAAATAGAGGATGAGTATTGTGAGCCAAACAAG
AAATAAAGAACTATTAGATAAAAAAATAAGATCAGAAATTGAGGCGATAAAAAAAATAATCGCCGAATTTGATGTCGTAA
AAGAAAGCGTTAATGAGTTAAGTGAAAAAGCAAAAACAGATCCTCAGGCGGCAGAAAAATTAAACAAATTAATTGAGGGG
TACACATATGGTGAAGAGCGAAAATTATATGATTCTGCCCTAAGTAAGATTGAAAAACTAATAGAGACACTGAGTCCAGC
AAGATCTAAAAGCCAATCAACAATGAATCAACGGAATAGAAATAATAGAAAAATAGTATGACAATTTTTAATAAAATAGA
CTATAACTACTATAAATTAATTAATTATCCAATCATGATGGTTCATGATGAATGGCTAGGTGATTTAACCGGTGTCAATC
AGGTCAGTTTTCGGCGTTTAAGAGAAACTAGTTCTACTCGTAATCAACTCAATAAGATATTGCGTCAGGAGATACAAGAT
AAAATTTCTGGTGTGGAATTATCTGACATAAATAAGGAAGGTTTTTTATATCAGTCAATTGGGAAAATAAGATTGCTTGC
TCTAAGTAGTGCATTATTTGACATTCAATGCCCTGATTATATTTTCTCACGATTATATCGAGAAACTCTGATTAGAGAGA
TAGGATATCAAAATGTGAAGCAGTTATCATTCTATTGGCAGGGAGGGCAATGTAAACCAGAATATGGTGAAGAACGGTTT
TGTGCTGAGTTAATAAAATACGGTGCAGGAAATTTGGAGTGGCTATTTGCTGATAATCCTTTATGGACCATAGTCAAATA
TCTTTTACCGAAAAGTGGAGAAATAAAACCAACTCATATTAATGATTTATTTCTTAACAGACTTAATAAAATTTTATTGC
CTTATGAAACTTTATGAATTTAAAAATATAGAAATTGATTTAGTGCTTACAGAAGATATCATACCAGAGGATAAGTTACA
GGAAATTATTCAATCTGATGATATTATCAAACTGGCTCGAAAAAAAACATATGAACATTTACTGAGGGCGAGGAGGAAAT
CGAAAGAATTAAAGATAGAATCCAGAAAAAAAATTGCCAGAAAAATGATTGCAATGAGAGAAAGGATTCGAAAAAATAAT
AAAATAAAATTAGATAAAGAGGTTAACCAATCGATAAAATGGGTTAAAGATATCCAGGCTATCGAGTTGGTCTTAATGCA
GGACATAATGAATAAGGTTCATTTGTCACTGACTAATGCATTACATTCTTTAGATACATCATCAAGAATTAATTGGGATG
ATTTACTTAATGAAGTTGTAAGGGAAACTCTATCTAATAACAATATTGTCGGAGCTATTAAGATCACTAAAAATCCAGAC
ATTAAACTTGATCCTGGCGAGGCCAACAATATACAGCTTATTAATGATGCAAACACACCGCATAATAAAATTATAATAGA
AAATGAATATATTAGAATAACTTTAGACCCATTAGAGCAAATAAGTATTTTATTGAATTCATTTAAAGATAATTATCTTA
GCATTATTCAGGAATGATGATATGTCTCAATTAATGACCATTGGCTCACAGCCAATATTTTTAATTATTGTATTTTTTCT
GTTATCATTACTGCCAATATTTGTTGTTATTGGTACTTCATTCCTGAAAATTTCTATTGTACTGGGGATATTGAAGAACG
CATTAGGCATTCAACAGGTACCACCAAACATGGCGCTAACATCAGTGTCTTTGATACTGACAATGTTTATTATGTCTCCG
ATAATATTACAGATAAATGATAATATTTCTCAGGAACCAATCAATTATACCGACTCTGATTTTTTTCAAAAAGTTGATGA
GAAAATATTATCACCATATCGCGGTTTTTTAGAAAAAAATACAGAGAAAGACAATGTAGAGTTTTTTGAACGTGCAGCTC
AAAAAAAATTGGGTAATGAAACTATCTTAAAAAAAGACTCTCTATTTATACTGTTACCGGCTTTCACGATGGGGCAGCTT
GAAGCTGCATTCAAGATAGGTTTTTTGCTCTATTTACCCTTTATTGCGATAGATTTGATCATTTCCAATATCTTATTGGC
CTTGGGTATGATGATGGTATCGCCAGTAACAATTTCGATTCCTTTTAAGATCTTGTTATTCATTCTTGTTGGAGGCTGGC
AAAAATTATTCGAATTTCTGTTGGTGGTGAATTGATGGATACTGGATATTTTGTTCAATTATGTGTGCAAACGTTCTGGA
TAATATTTATCCTCTCATTGCCTACAGTCATAGCGGCCTCTGTTATCGGTATTATTATTAGTCTGGTCCAGGCTATAACG
CAGTTACAGGATCAAACATTGCCTTTTTTGCTAAAAATAATAGCAGTGTTTGCTACGCTTGCCCTGACTTATCACTGGAT
GGGAACAACAATCATCAACTTCTCGTCGATAATATTTGAAATGATTCCGAAGGTGAACGGCTAATGAATGAGATAATGAC
GGTCATAGTATCATCATTTTATTGTATACTCAGGCCGCTGGGGATGTTTATTATCCTACCAATATTTTCAACAGGTGTTT
TGCTCAGTAACTTTATTCGCAACTCAATTATGATTGCGTTTACGCTTCCGATCATAGTAGAGAACTATACATTTTCGGAA
AAATTGCCATCTGGAATCTTTCAGTTGACAGGAATAGTGCTAAAAGAAATAAGTATTGGTTTTTTCATTGGGTTATCATT
TACTATTCTTTTTTGGGCAATAGATGCGGCTGGGCAGATTATTGATACTCTAAGAGGTTCAACAATATCTTCAATTTTTA
ACCCGTCCATAAGTGATTCATCTTCTATCACTGGCGTTATTTTGTACCAATTTATCTCTGTGATCTTTGTTATTCATGGT
GGGATACAAAGCATTCTGGATAAGCTATATTTATCCTACGAGATATTACCATTACAAGCCGATATTGCATTCAATCGTGC
TTTAATAGATTTTTTGTTTTCTCTATGGGATTCATTTATTAAACTGATGTTATCATTTTCAGTTCCCATGATTATCGGTA
TATTCTTATGTGATATGGGGTTTGGGTTTCTTAACAAAACAGCGCCTCAACTAAACGTATTCACATTATCACTGCCAGTA
AAAAGTTTGATAGCAATCTTTATATTGCTATTAGTTATTCATGTTTTTCCTGATTTTATTACGGCAAATATTCATTCTGA
CATAATTGATAGATCGTTACCGAGCATGATTAATGAGTGAAAAAACAGAAAAGCCCACACCCAAAAAACTGAGGGATCTA
AAAAAGAAGGGCGATGTAACAAAAAGTGAAGAGGTAATGGCTGCAGTGCAGTCATTAATCTTATTTTCATTTTTTTCTTT
ATATGGCATGAGTTTTTTTGTTGATATAGTTGGGTTAGTTAATACGACAATAGACTCGCTAAATAGACCGTTTTTGTATG
CCATTCGAGAAATATTAGGTGCGGTGTTAAATATATTTTTATTATATATTTTGCCAATTTCTTTGATTGTCTTTGTTGGA
ACTGTTACGACTGGTGTATCACAAATAGGATTCATCTTTGCGGTTGAAAAAATAAAACCATCGGCTCAGAAGATTAGTGT
AAAAAATAACCTGAAAAATATTTTTTCTGTAAAGAGCATTTTTGAGCTACTTAAATCAGTATTTAAGTTAGTGATAATTG
TTCTCATTTTTTATTTTATGGGGCATTCATATGCAAATGAGTTTGCTAATTTCACAGGACTGAACGCATATCAAGCTCTT
GTCGTTGTTGCCTTTTTTGTTTTTCTTTTATGGAAAGGCGTGCTATTCGGATATCTACTCTTTTCAGTATTTGATTTCTG
GTTCCAGAAGCATGAGGGACTGAAGAAAATGAAAATGAGTAAAGATGAGGTGAAACGAGAAGCCAAGGATACTGATGGTA
ACCCTGAAATTAAAGGGGAGCGCCGTCGCCTTCATTCCGAGATACAAAGTGGAAGTTTGGCGAATAACATCAAAAAATCA
ACCGTTATTGTTAAAAACCCGACTCACATTGCGATTTGCCTATACTATAAACTTGGGGAGACTCCATTACCTTTAGTTAT
TGAAACAGGAAAAGATGCCAAAGCTCTACAGATCATTAAACTGGCTGAACTCTATGATATTCCAGTGATTGAAGATATTC
CTTTAGCAAGAAGTCTCTATAAGAATATACATAAAGGACAATATATAACAGAAGACTTTTTTGAACCTGTGGCACAATTG
ATTCGTATTGCGATAGACCTTGATTATTAATCGATAATTTGCTCATTATTCTTTAATTTATTATATGTTTTATATATTTT
CATTGCGTATTGCCTTCTGAGTTCTACTGCATTTGGTGTATTAAAGTAACCTGCATTATACGCACCAACTGCATCCCATG
TATTCCCTCTGTATTTTATGTTAGAGGCTAAGATATAACCAGCAACAGATATGTTTATACAGGCATTATTCAATAAATCA
TCTTCAGATATATTAAATTTGCTTAATAAATCTAAATGAGATGAATTAATTTGCATTATACCTATATCATACGTTCCGTT
TTTGTTTGTTTTGCTTTTTATTCCGCTTTTGCATTTTGATTCATTCCATGCAATTGCTTTTAATATTAGTGGATCTATGT
TATATGCTTTTCCTGTAATTTCAAAACAATCGGAAGCATTACAGTAATTTGAAATGAGAATGATACTCAGTATTATTTTT
TTCATTTTTACGTTGTTACTCAATATTATTAATCAGAAATTACATATGTTAACCAGGGAAACAGCAGGTTGAAACATGAG
TATATTTAATGATATATTACATTGCAATCTGGAGAAAAAGAAAGGTCTCCATTATTCTTGATATTGCTTATGGATAGAAC
AAATTGAAAGGAGTGAGGTTAGTATGAAACTGAGTGAGTTATGATTATGAAGGATGGCATCTATAGCATTATATTTATTA
GCAATGAAGACTCCTGTGGGGAAGGTATACTGATTAAAAATGGAAATATGATCACTGGCGGCGATATTGCTTCTGTGTAT
CAGGGGGTTCTCTCTGAAGATGAGGACATCATACTTCATGTCCATCGATATAATTACGAAATTCCCTCGGTGCTAAACAT
TGAACAAGATTATCAATTAGTTATCCCTAAAAAAGTACTGAGTAATGATAATAATCTCACATTACATTGCCATGTAAGAG
GAAATGAAAAATTGTTTGTTGATGTTTATGCCAAATTTATAGAACCATTAATTATTAAAAACACAGGAATGCCACAAGTT
TATTTAGAATAATTTTTATGTATGTTTTTTATGTCGATTTATTTATCAAATAAAAAGAATATGGAAAATGGAATCTAAAA
ATAAAAATGGCGACTATGTAATTCCTGACTCAGTAAAGAATTACGATGGTGAACCTCTGTATATCTTGGTTTCTCTTTGG
TGTAAATTGCAGGAGAAATGGATTTCTCGCAATGATATTGCCGAAGCATTCGGTATAAACCTGAGGAGAGCATCATTTAT
TATAACTTATATATCGAGAAGAAAAGAAAAAATTTCATTTCGTGTCAGATATGTTAGTTATGGTAATTTGCATTATAAGC
GCCTTGAGATTTTCATTTATGATGTTAACCTTGAGGCGGTTCCGATAGAAAGTCCTGGATCAACCGGACCAAAAAGAAAA
ACCTACCGAGTTGGTAATGGTATTGTGGGACAGTCTAATATCTGGAACGAAATGATCTTGAGGCGGAAAAAGGAGAGTTA
GACGTAATTTTTTGAGTATATTTTATAGAAGAATAAAAATAAAGCTATATTTAAGGGTTTTGTTTTCCAGGGTAAGCCTT
TTTCTCGGCTAAAGTTTGAAGGTCATTTCCTGACAAATATACTCTGAGCTATAGATGATTGGAAAGATCAGATTTCTAAT
GCTAAGTTAAGATATACAGATTGTTTCATAAACGGAAATGATATTAAATACAGCAGAAGATAGTTCAGGGCATAAAATCC
TGGTTAATGGAATAACCCCACACCTGTAGATAAATCTACCAGTGGTCGGTGCTCAACTTTGGGAGCACTTCACTATAGCA
GCTTTATTATTTCCGATAGAAAATCCCCAGTCAGCCTGGGGATTGGTATAGCTGATGGTAGTTTTTACTCTGTATTACCT
AACAATTTTTTAATATTTTCTTTATATGTAGTGTATTTTTCTTTTTCATTACACCACATTAAACAAGCCTTAAAGGCTTT
CTTGGCCATTTTCTTATTTCCGACGAGTAAGTAGCTAATTCCAGAATAATAAGATGCCCTGGGATCTTGCATAACTAAAG
TTGCACAGCGTGCGAAACACAGTTGTGCATCTTCATGATTTGATAAACGCTGATGGCATAAGCCCAGAGATAAGGTGTAG
TCATAATTCCAGTGTTCCAGATATGTGAGCAAATGGAATAGATTTCTTGCGGTTATTACATCACCAGATTGATATGCTGT
ATAGGCATAAGAATGAAGGTCATTGAGATCTTGTTGTGTCAGATTTGTTAATGACGCTAATGTGCCACCATCCTGGTAGA
AATCATAAATATCCTCTAGAGAGCTAAATTTCCTGCTCATAAAGCCTCATTTATTATTCGCTAGATGCAGATTTTATCGG
GGTTGCTTTAATTAAAAAGAGTCGAACAACACTATGTTTTTGTTTTACCGTACTGGAGAATAAACTACCAATAACAGGAA
TGTCGCTTAACAGCGGTATACCATCTTTACTTGAACTTTCTTTATCTTGGATAAATCCGCCAAGTAATAAACTTTCTCCT
GCACTTAATGTCGCTTCTGTTGTCATTTCTGAATTTTGTACTTCAGGTAAGGTGCTGCTGGCATCCTGAGCATTGCTTTG
GTTAGTCGATTGATTGCCATCCTGAATATCAAGTAACAAACGAACTCGTTCCCGACGTTTTCCGGTAAGACTATTCGAGC
TGTCATCAAGTATACGTGGTGTCACTCTCAGCAATGTTCCGCTTGTAATACTTTCCAGAGACGCCACCTTTTCTCCGGAG
ACTTTTGTATAAAACGTTACGTTTTTATCAAGAATCGCCTGCATATTATTTAAGGTTATAATTGACGGCTGAGAGAGTAT
TTTAGCTTTCGAGTTCTGTTGTAACGCATTCACCCTAATCATAAAATTACTGGCATTACTTATCACAGAAGAGCTGATAT
TAGCCTGTGCGGTAGAGCTATTAAAGGCAATCGTACCTTGTCCTGCATTTAACGTACCGGACCAGTTTACGCCGAGCTGC
TGAAGATCGTTTGCATCAACATCAATAATTGAGACAGAAATTTCAATTTGCCTTTGTTCAATATCAAGCTCAGAAATTAA
TTGCTGATAGATATCCATCGTTATTTCGCGGTCTTTTACAACAACTGCATTAAGACGTGGATCAGCGGAAATCGTTACAC
TGTTATCAAACAGGTTACCGCTTCGCTCGACGGCACCTTTACCGGTACTGGGAAGCGAACCATTACTTGCCATTGTCTTC
AGAATGGAGACAACACCTGGGACGACAACATTTTGGTCACGGTATTTGTATGTTATATCTGTCGCTGACGCATAGTTCAG
TTTAAAGACCTTAACAACATCTTTATTTTTGGCTTTAGACTGTGCCTCTTTATCAAGACTTTCTGATAAAGATGTAATAT
ATTTTATACATTCAGGAACACCCCGAACTTCAATCGAGTTAAATGTCGTAATTTTTCTCACATTGCAAGAGTTTTTGTTT
ACTGAGATTGTATCACTCAGATATTTTAGCAGTGAGTCAATATCCAGATATGTTGGTGTAATTATACTTCTTGATATTTC
ATTTGTTTTATAAATATACAAGATGTTCTCATCATAATACCATGTGAGATGATAGAGTTTGGACAGTTTTTCCAGTACTT
TTACAGGTTTTTCATTTTTTATTTCGCCAGAGAAATCATCATTCACGGAACTACTGATGAAAACAGGAATGCTGTAGTTA
GCAGCAAAGTCATTAAGGATTGCACGTACTGGAGAACTTTTAGTAATAATAAAATATTCGTTCTTGCCTAATCTTTTTTC
CAGAGAGGACGGGGCAGCTTGTGCACTGCAGCAAAATAGTGCTGTAAAAATAAAAAAACTTATTTTTTTCATTACACAAT
TCGTCCTATATCAGAAAACAAGTGTGTTGGCGGCATCATTGTATCTGATGAAGATGATTGCTCTAGTTTATCAAATTGCT
TGTCGAGCAACGAGGCGAGAGTATGTTGCATTATTGCTTTTGACATGTTTGCGCGATGATTATTATCTTTATGAAAAATT
TGGCAAAGATACCACTTCTTATTAGACAGGAAAATACCCATTTGTTTATATTCTTTACTAACGGCCAGGATATTGCAGAG
TCTGATAAATGTATCTGTTGGAATCTGACGAAAATCACCACTAAGCTCGATATATAGAACCCAGTAGTTTCCAAAATCGT
GCAAGAAAGCATTTTTTTGGTAGATATAAAAAGTGAGATGCGTTGGTGAACCGTTGACATCCTTTACAAAATCAAGGGCC
GTTAGCCAGTCACAATCATTCTTTGCTATGCCATTATTATTGTTCATACATATTACCCGTCCTGTCCTGAGGATGACTTG
ATAACAACACTAATATTTTCTAATTTGAGATCGTCGACACTATTCTTAACCAGGTTTTTTATCTGAATGACCGATGGTGC
TAAGTTAACCTCTGGCGAGCTGATGACTAAAACGGCTGCTGAGGATGGTTGACTTTCGTTATTGTTAACATTTAATGAAA
CGCTGCAATCGATAACACCGGGTATTTTACTTAGCAACCTTTCGATGTCTTGTTCTTTGAGATAGTTGATTTTTGCATTT
TCTTGTGATGGCGATGCCACTAACTGGCTGGGTGGGAAAATAACCTCGATATCTGCAAATTTCTTTTTCGGGAAGCCGTT
ATTATTTAAAATCGTTATTGCGCGAACAAAATCCTCTTTTTCCACACTGAGTGTCATATTTCCACTTTTGTCCATTTCTT
TGGAAACATTGACATCATTGGATAGCAACAGTGCTTGCATCTGATTAGCTTCTTTTTCTGTTAATCCTGTATACAATTGC
TCTTTACATGCCACTGTCAAACAAATAGCAGCCAATAAAAAAAGGTTTTTAATGTGTTTTTTCATTTTTATTGCATCGAA
ACTAATTTTGTAACCGATGTTGAAAGGAGGCTTGCTAACTTAGATACGACATCAACATTGACGTTTGCGTTGAGCACATT
CTTTTGTAAAGTGAGTACATCTTCGGGCGAGAGCCCACCTGCAGATAGTGCATCGAAACTGAGATCGGTGTTCATTGTTG
CAAGATGTCGCTTTTTAATTTCCTCAATCAACACTTGTTCTGGGGAAGACACTCCCGCCGTTTTAGGGAGTAATTGATCA
AGAAACTGAGCCGCTCCGGCTGCAGAGGGGGTTGATGCTAACGGGATATGCTCATCAACGACATTTGTTTGGGATGCTTT
ATTTAACTGAATATTAATGTTTTCCGATTGATTAATATTATTCATATTTACTGTTAGTCTCTTTTCATGAGAGAGGCAAT
AGCATAATGCATCCATTACCTCTCTATTTTTATGCGATGCGATGATTAGGCATATTTCATCGCTAATCCGCCGGCAACAG
TAGTTACGCCACCTAATACACCGGCTGCGATTCCTAAGCCTAATCTTTGTGAAGGGTCGTCAACACACATTGCTGCGATA
CCAGTACCGATAGCGGCTAGAACACCTGCACCTATTAAAACTCCACCCAGGATTCTAACGCTGCGACTTGTTCCACCTTC
TGACTGCATCACCCCTGTCTTCTCATCCACTGGATTATTTCCATTGATTGTGGCTGCCAGTGGTAATACTGCACCAGAAG
GGCTTAAATTTGCTGCTTCCATTGATCTTTCTCCTTTTGTCTAATTTAGACATTTACCTGGTTATAAATAACCAAATTAT
CCCATAGGCAACTATTATATTATTTAAATAGTTGCAATGTACATAAAGTACATATACTGTATATATTATCCAATACGCTT
TTTCAAGCAATAATATTCACACGTATACTTACTTCAGAGCCTGCAGATGAATCTTTTAGTTAAAAGAAATGTTGAAGAGT
TTTTAAGATTGTTGGGAAATGATTTTTATTTATTTGATAACCGTGTTGAAATTGATTTTAATGGGTTTTCTTTTTTTATT
GAAATAATTGATAATAATGTTTTTGTTACGTTTGCTTTAGAGTATAACGAAAACGCATTTTTCTCTTTCTTTAGTGCCCT
TGCTCCTGAGCGTACGCAGGGAGTGATTGAACATATTTTTGTCTACGATAATAAATTGTGCTTAAGTTGTTTGTTAACCA
ATATCGATGTTTTTTTTCTAATGAATACTTTTCAACAGCATGTGCAGATTATTGAGCGCGTTCGCAGGATGACATCATGA
ATAAACTCTTAAATATATTTAAAAAAGCAGAGTCATATCACGATCTTATTCTGGCTCTCTTCTTCTTTATGGCTGTAATG
ATGATGATTATTCCACTACCAACAGTTGTGGTGGATATCATTATCGCGATTAATATTTCGACAGCTTTACTTTTATTAAT
GCTCTCAATCTATATAAAAAATCCTCTTGAACTAACTTCTTTCCCCACAATCCTGTTGATTACGACGTTGATGCGCCTGT
CGCTCAGTGTTAGTACAACCAGACTTATTCTGCTGCATCACGATGCGGGTGACATTATTTACTCCTTCGGTAACTTTGTT
GTTGGCGGTAATATTGTTGTTGGCCTGGTTATTTTTACTATTATCACCATTGTTCAATTTATGGTTATTACAAAAGGGGC
CGAGCGTGTTGCTGAAGTGAGTGCTCGTTTTTCCCTTGATGGTATGCCAGGAAAGCAAATGAGTATTGATGGTGATATGC
GCGCAGGCGTTATTGACCCGCTTGAGGCAAAAGTTCTTCGCTCCCGAGTGCAAAAGGAAAGCCAGTTTTATGGTTCAATG
GACGGGGCGATGAAGTTTGTAAAAGGGGACGCTATTGCTGGTATCATTATTGTTTTAGTTAACCTTTTTGGTGGCGTGCT
CATTGGTATGTGGCAATTTGACATGCCATTTAGTGAGGCACTTAGCCTGTTTTCTGTATTGTCTGTCGGTGATGCTTTGG
TTGCCCAGATCCCTGCGCTTATTATTTCTGTCACCGCGGGCGTGGTTGTTACTCGTGTGCCCGGTGAAAGCGAAAAAGAA
GAAAACCTTGCAGGTGATATTGTTCAACAGGTTTCTGTTAATAGTCGCCCTTTTTTAATCAGTGCCGCACTAATGCTCGT
AATGGCGATTATTCCGGGCTTTCCTACATTGGTCTTCTTATTTCTGGCGGTTTGCCTGTTGGGGATAGCCTGGAAATTAC
AGAAGAAAAGAACATTTGGAGCTGGCAATAATAAGGATGCTATGGGAGCTGATTTGTCTAATAGCCAAAACATCTCACCG
GGCGCTGAGCCATTGATTTTAAACTTAAGTAGTAATATTTATAGTTCAGACATTACACAGCAAATTGAGGTCATGCGTTG
GAATTTCTTTGAGGAAAGTGGAATTCCATTGCCTAAGATTATTGTTAATCCGGTTAAAAATAATGATAGCGCAATAGAAT
TTTTGCTCTATCAAGAGTCAATATACAAAGATACTCTTATAGATGATACTGTCTATTTTGAGGCTGGGCATGCAGAGATA
TCATTCGAATTTGTCCAGGAAAAGCTTTCGACTAACTCTATCGTATATAAGACGAATAAGACTAATCAACAACTCGCTCA
CCTTACAGGTATGGATGTTTATGCAACAACAAATGATAAGATAACGTTTTTGCTAAAGAAACTTGTATTGTCTAATGCCA
AAGAGTTCATCGGCGTACAAGAAACGCGTTATTTGATGGACATCATGGAGAGAAAATATAACGAGCTTGTGAAAGAGCTG
CAGCGCCAGCTTGGTTTGAGCAAAATTGTTGACATTCTACAACGTCTCGTAGAGGAAAATGTCTCAATTAGAGATCTGAG
AACTATCTTTGAGACGCTTATTTTTTGGTCAACAAAAGAAAAGGATGTGGTTATCTTGTGCGAATACGTTCGTATCGCCC
TGCGTCGGCATATTTTAGGTCGCTATAGCGTTAGCGGTACACTTCTGAACGTTTGGCTTATTGGCTCTGATATTGAAAAT
GAGCTACGAGAGTCGATCAGACAAACGTCATCAGGTTCGTATCTGAATATCTCACCGGAGCGAACTGAGCAGATAATTGG
CTTCTTAAAAAATATCATGAATCCAACGGGGAACGGCGTCATTCTGACCGCTTTAGATATCAGGCGCTATGTGAAGAAAA
TGATTGAAGGTTCGTTCCCGTCAGTCCCCGTGCTCTCTTTTCAGGAGGTTGGGAATAATATCGAACTTAAAGTATTAGGA
ACGGTAAATGATTTCAGAGCATGATTCTGTATTGGAAAAATACCCACGTATTCAGAAAGTGCTCAATAGCACTGTGCCGG
CATTATCATTAAATTCGTCTACCAGATATGAAGGCAAGATTATCAATATCGGCGGGACGATTATTAAGGCGCGTTTACCA
AAAGCGCGTATTGGCGCCTTTTACAAGATAGAACCCAGTCAACGTTTAGCCGAGGTGATCGCTATTGATGAAGATGAGGT
TTTCTTGTTGCCTTTTGAGCATGTTTCCGGCATGTACTGTGGTCAGTGGTTAAGTTATCAGGGGGATGAGTTCAAGATTC
GTGTTGGAGACGCACTACTTGGGCGGCTTATTGATGGCATAGGCAGACCAATGGAGAGTAATATTGTTGCCCCCTATCTT
CCGTTTGAACGCAGCTTGTATGCTGAACCACCAGATCCTTTATTAAGGCAGGTTATTGATCAGCCATTTATACTTGGCGT
CAGGGCAATTGATGGGCTACTAACTTGCGGTATTGGGCAGCGTATCGGTATTTTTGCTGGTTCAGGCGTTGGTAAAAGTA
CGCTTTTGGGGATGATTTGTAATGGCGCATCCGCAGATATTATTGTCCTTGCTCTTATCGGCGAACGTGGTCGCGAAGTA
AATGAATTCCTCGCGCTTTTACCTCAATCCACGCTTTCTAAATGTGTGCTGGTCGTCACAACGTCAGACCGCCCCGCGCT
GGAAAGGATGAAAGCCGCATTTACGGCGACGACTATTGCAGAGTACTTCCGCGATCAAGGTAAAAATGTATTATTAATGA
TGGATTCTGTAACTCGTTATGCCCGAGCCGCGCGTGATGTTGGGCTTGCATCGGGAGAGCCTGATGTAAGGGGGGGATTC
CCTCCGAGTGTTTTTTCTTCGTTACCCAAATTATTAGAGCGAGCGGGGCCTGCGCCAAAAGGTTCAATAACCGCGATTTA
TACGGTGTTGTTAGAAAGCGATAATGTTAATGATCCTATTGGCGATGAAGTCCGCTCTATTCTTGATGGGCACATCGTAC
TTACCCGAGAACTTGCAGAGGAAAACCATTTCCCTGCAATTGATATTGGTTTAAGTGCCAGTCGTGTTATGCATAACGTT
GTTACATCGGAGCATTTGCGTGCGGCGGCAGAATGCAAAAAGCTTATTGCAACTTATAAAAATGTTGAGCTGCTTATTCG
TATTGGTGAGTACACGATGGGGCAAGATCCTGAAGCAGATAAGGCAATAAAAAATAGGAAATTAATTCAGAACTTTATAC
AACAAAGCACCAAAGATATCAGTAGTTACGAAAAAACGATTGAAAGCCTATTCAAAGTGGTTGCCTGAGTATGTTGGACA
GAATTTTATCTATTCGTAAAAGCAGAGCGAACCGATTGAGAGAATCAATGGCTAAGATTAACTCTCAGATAAAAGAGGTG
GATGGTAAACTCGATGACTGCGAGCAATCCATTAAAGAGTCGATTGCCTCTAAGCAGGCGTATTGTGCATCGCTGGTGAA
TTTGGATAAAGTGTCGTTGTATAAATATCAGATTAAAAACAATGCATTTGATGAGCAAAAGCAGCGATTGTATGAGAAAA
AATCTTCACTTTCGAAGGAAAAGCGTTCATTGCTAGATTCACAAAAACGAACAAAAGAGAATCTGCAACATGTTAATAAA
TCAGTAGAAAAATTATCTTTTGCCATAAAGGAACATTACTTTGACTAGAGTTTCTCTAAAAAGAAATTTGATAGAGCCTG
TTTCTTTTCGGCCATCAGATGATTGGCCGCAAGGAGAAGAAAGTTTTAATGATATTTTTTATCATATAAAAAAAAGATCG
CCTGATACGTTGTTCATACGAATGGCTTCTTTATGGAAGAGATTGTTTTACTCCTCGGGCCGAAGACGACGCTACTTTGA
AGAAGGGGAGCACTCGTTTAGTATTCTTTGTGGAAGATTACGAGGAGTTGTTTTAACAATTAAATGTAGTAACGGAATCA
TTTATCTGTCTATTAAAATAAGCCAAAATAATAGAAATCATGTTTTTTTATATCATAAAAAAGACTATGTTTTCGATAAG
TTAAAAGAAATCTTTCCTGATGAAGCCATTGAGTTCACAATTGAATATGAAAATTAACGATTTTTATTTGCCGTTGTTGC
CAGTTATCGGAACCGGTCGCCTCTATATTACGTCCGAAGGTCATGCTTGCCATGCATATTTTCGTGAGGTCAGCGGTCAT
GGTATTCGTTTCACGTTGACATACTCGGGCTATGAGGGGCGTTTCTGGATATCAGAAGAACAGTTCATTCAGTGGTGCCA
AGAGTTATTCCCGTATAGTGAAAGCCGGCTGATACCGGAAGATATGATAAAACTCATGATCTTATGGGTAATGCAGACTG
CCTTACCGGAAGGTGATGTGTCAGTTGATGATGTTCAATTTACGATGCTAAATAAAGATGTTTATCCGGTAATAGAAAAT
AATAATGGAGAAAACAGACTTAATGTAATTATACTCGAAACAACGGTACAAAGTTTACAACATCTGATTAATGATAATTG
GCAATTTGTTCCACATTCTAATGCTCTTTTTTTTGATGGCTATATCGTACCTGGGTGGACTGATTATCCAGTTACAGAGT
TGAGAGTTGGTGATAGTCTGAGACTCTATCATGTTGATGATAGTCAAGAGAGAAGGTGCTGGATTGTTATTAATAACCCT
TTGGCAACCGTAAAGCTGAGCGATAATAATTTATCTGTCACGGATGTTCTGGCTGCAGATCCGTTATGTACTATCAGCAG
CGAGACTGTGATGAATCGCATTTATTGTGTGATTGGCACAGTGCATATTGATATACATATGTTGCGTAATGTCCAAAAAG
ATGACATTATCGATTCAACGGGATATCATCTTTTTGGTGGGTGCCAGTTAGTACGGAATAATACCACAATCGCATACGGG
AGTATTATAAAAATCAACGAAGATTTTTATTTTACTATTAGCGTAGTATGTGATTAATCAGGAATGCGTTATATAGGGAG
GTGTATGATGTCGTCATCATTATCAGGTATAACATTCACTACTTCTTTGACAAGCCATGCGTCATGGAATAAGTTGACCC
GAACTCTTCATATATCGAATGATGATATAGTAGATGAACTGCAACTTAAAGCACGCATGCAGCAGCGTCACCACCGGGTT
TTTGCAGGCATTGATGACTATTCAATTATCAATTTTCGTGGAAAAGATTATGCTGTCCGCTTCATTAAAGATAAAGATAA
TTATGTGTACAAAGTAAATAAGATAACTCAGGAAAGTGGATGTTTCTCAAGGATATTTAGCTTTTTGTATGGAGGCGTTA
CGAAGGCCCTGGAAAGTAAATTAAATGAGAGACACATTACGCCACTGTCTTCAACCTGGTTTCCTCGCACTGCACTGGAA
GGCTTTTTAACTGAAAGAGGGCTCTCTTCTTTGTTACGTCGCGTACAGTCTACAGAAGGTGTGAACCCTCCAGAGAATAC
TACATTAAACTCTTTATCAGGTGTGACAGTTTAAGTATTATTTTATGCTGTTTTCTTTTTCTCCCCAGAATGTGTTCTGT
TCTGGGGACGATATTTCATTATTTTTTTGAAAAGAATATGCAGGCGAAATGATTAGTATTTCAAGGATAGAGCACTGTAG
TTTTTGTGAAATATGGACTGAATGGATGCCACCATCCAGTCCATATTATCACTTCCAAAGTAAAAAGCAAATAAATCAAA
GTGAAAGTAGTTTTATTATTTCTTTTTTTAGTAGATATCCGTTTTCCATCAAGTTAGTGAATTCCGTTATATCTATTTTA
TTTTTGGGGAATGCAATGTTTAAGAAAGTTTTATCGTCTTTTAATGATAAGAAAAACATACCAAGCATTTCTCGGTTGTT
GTTTATTTCTAATATTTTATTGATTTGATCTGGTTCGTTGGTTGATAGGTAACAATAAAAAAACAAAATTTCTGATTGAG
GTGCGCACTCAAGTATCCACTCATGACCATCGTTATCGTGAAAAGCGAGGGCGTCAGTTTGCTCTTCCAATGTTATCCCA
AACGTATGTGCAAGATCTTTGCAAAATTGTTCATTCATATTGTAGTCCTGTCATTCTTATAACGCTGATGTGTTCATAGG
TAATTTATTTGTGAGTTCTTACACAAATAACAAGGAAAAAATATAACATGTAAGTAATAATGTTGCATATTCATGATAGC
ATATGATAAATGTAGTGCAACCACCTATAAATAGTGCTGGAGGAAAAGTTCTGGAGGAAAATTAAAATCATAAAATAATA
TTATAGTTTTATTTATTCGTTTTATTTTTATAGGTGTAAATGTTTTTTATGTAATTTATAAAGGTTTATAGCATGTTTAG
TCCAACGGCAATGGTAGGTAGAGCGTTAGCTCAGGCGGTTACACAAACTCTTAGACCCGCTGTAACCAAGGCTGCGACGC
AAGCGGGCATGGCAGCCAGTGGTATGAGGTTCACACCTATGCAGTCGAACCTTATGATTAATCATGGCAAACTGACTACC
CAGCTACTACAGGCCGTAGCCAAACAAACTGGTAGTAGTGATACCCAGCAATGGTTCAAGCAAGAGCAGATTACTTTTCT
ATCCAGAGCAGTAAACAAAACTGTGGATGACTATTGCATGAGTAATAATTCGGCAATTAGTAAGGAGACTAAATGTCGCA
TTTTTAAAGAGGTTGAAAGCGCGATACAACAGCCTCTCGATATGAACTGTGCACAATCATCAATTAGTCACTTTTTGCAA
TCCAATAAATACTTTAATCAGAAAGTTGATGAGCAGTGTGGTAAAGGAGTGGATCCCATTACACGTTTTAACACTCAAAC
CAAATTGATAGAACAAGTCTCACGCGAAATCTTTGAACAGAATTTTAGCACCGCGAAAATCAGTGATATCAAGGCTCTAA
CTGAGAAGGCGATTGCAGACAATGTGCAGGATACTCGGCTGTAGGGGGAAACTTACTGCGCTGTTATTTTTTTTCTTGAT
GCAAAAAGGTCTCTATAGACGTTTAAAATAAAATATTATTTTTCAATACACAATTAAATTTCTGCATATAAAAATTATAA
TTATTTTTTTTCGATAATTATATAATGATTTTGATTATGTGATTTTTTAGTTGGAAATACAGACATGCATTTCTGGTGCG
TTATTTTGCTTGCATCAAAAATTATACTGTGATTTATTTGGTTTATGCTCAGTTGTTTTATCGGCTGCATACCGTTACGT
CATAGTAATATAAAGGAACGTGTCAAATTTCTAAATAAAAGGATATATGTATGCCTATTGGTAACCTTGGTAATAATGTA
AATGGCAATCATTTAATTCCCCCTGCGCCGCCACTACCTTCACAAACAGACGGCGCGGCACGGGGAGGAACTGGTCATCT
AATTAGCTCTACAGGAGCATTAGGATCTCGTTCATTGTTTTCTCCCCTGAGAAATTCTATGGCTGATTCTGTCGATTCCA
GAGATATTCCAGGACTTCCTACAAACCCATCGAGGCTTGCTGCAGCTACATCTGAGACATGCTTGCTTGGAGGATTTGAA
GTTCTCCATGATAAGGGGCCACTTGATATTCTCAATACGCAAATTGGACCCTCTGCATTTCGTGTTGAAGTGCAGGCAGA
TGGTACTCATGCCGCTATTGGAGAAAAAAATGGTTTGGAGGTTAGCGTTACATTAAGTCCTCAAGAATGGAGCAGCTTGC
AATCTATTGATACTGAGGGTAAAAACAGATTTGTTTTTACCGGGGGACGTGGCGGTAGTGGGCATCCGATGGTCACTGTC
GCATCAGATATCGCGGAAGCTCGTACGAAAATACTGGCCAAATTAGACCCAGACAATCATGGAGGACGTCAACCCAAGGA
CGTTGATACGCGTTCTGTTGGTGTTGGCAGCGCTTCGGGAATAGATGATGGCGTTGTTAGCGAAACCCATACTTCAACAA
CAAATTCCAGCGTTCGCTCAGATCCTAAATTCTGGGTTTCTGTCGGCGCAATTGCTGCTGGTTTAGCGGGACTGGCGGCA
ACTGGTATTGCACAGGCGTTGGCTTTGACACCGGAACCGGATGATCCTACAACCACCGATCCTGATCAGGCCGCAAATGC
TGCAGAAAGTGCAACAAAAGATCAGTTAACGCAAGAAGCATTCAAGAACCCTGAGAACCAGAAAGTTAACATCGATGCGA
ACGGAAATGCTATTCCGTCTGGGGAATTAAAAGATGATATTGTTGAGCAAATAGCACAACAAGCTAAAGAGGCTGGTGAG
GTGGCCAGACAGCAGGCTGTTGAAAGCAATGCACAGGCGCAGCAGCGATATGAGGATCAGCATGCCAGACGTCAGGAGGA
ATTACAGCTTTCATCGGGTATTGGTTACGGCCTCAGCAGTGCATTGATTGTTGCTGGGGGAATTGGTGCTGGTGTAACGA
CTGCGCTCCATAGACGAAATCAGCCGGCAGAACAGACAACTACTACAACAACACATACGGTAGTGCAGCAACAGACCGGA
GGGAATACCCCAGCACAAGGTGGCACTGATGCCACAAGAGCAGAAGACGCTTCTCTGAATAGACGTGATTCGCAGGGGAG
TGTTGCATCGACACACTGGTCAGATTCCTCTAGCGAAGTGGTTAATCCATATGCTGAAGTTGGGGGGGCTCGGAATAGTC
TATCGGCTCATCAGCCAGAAGAGCATATTTATGATGAGGTCGCTGCAGATCCTGGTTATAGCGTTATTCAGAATTTTTCA
GGGAGCGGCCCAGTTACCGGAAGGTTAATAGGAACTCCAGGGCAAGGTATCCAAAGTACTTATGCGCTTCTGGCAAACAG
CGGCGGATTGCGTTTAGGTATGGGAGGATTAACGAGTGGTGGCGAGAGCGCAGTAAGTTCTGTAAATGCCGCACCAACGC
CGGGACCAGTACGTTTCGTTTAAATATATCTGTGAGTATTTAGTTGAGGTTGGGGTGGGGTGGGGGGGCGTTTTACTAGC
GTTAATGTTTCAGAGAACAACGTTGCAGCATGGGTAACTCTTGAACTTCTGTTATTATAAATCAATTAAGAGAAATTATA
ATGTCATCAAGATCTGAACTTTTATTAGATAGGTTTGCGGAAAAAATTGGTGTTGGATCTATTTCCTTTAATGAAAATAG
ATTGTGTTCTTTTGCTATTGATGAAATTTATTATATTTCGTTATCTGATGCCAATGACGAATATATGATGATTTATGGCG
TCTGTGGAAAATTCCCGACAGATAACCCTAACTTCGCTCTTGAGATTTTGAATGCAAACTTATGGTTTGCAGAGAATGGT
GGGCCATACCTGTGTTATGAGTCAGGAGCACAATCGCTGTTGTTAGCGTTACGTTTCCCGCTCGATGATGCTACCCCTGA
AAAACTTGAGAATGAAATAGAAGTCGTCGTTAAGTCGATGGAAAATCTGTATTTGGTATTACATAATCAGGGAATAACAT
TAGAAAACGAACATATGAAAATAGAGGAAATTAGCTCAAGCGATAATAAACATTATTACGCCGGAAGATAAAACTTATTT
ATTAGTATTAATTTACTACTCATTCTAACTCATTGTGGTGGAGCCCAAACATGATTACTCATGGTTTTTATGCCCGGACC
CGGCACAAGCATAAGCTAAAAAAAACATTTATTATGCTTAGTGCTGGTTTAGGATTGTTTTTTTATGTTAATCAGAATTC
ATTTGCAAATGGTGAAAATTATTTTAAATTGGGTTCGGATTCAAAACTGTTAACTCATAATAGCTATCAGAATCGCCTTT
TTTATACGTTGAAAACAGGTGAAACTGTTGCCGATCTTTCTAAATCGCAAGATATTAATTTATCGACGATTTGGTCGTTG
AATAAGCATTTATACAGTTCTGAAAGCGAAATGATGAAGGCCGCGCCTGGTCAGCAGATCATTTTGCCACTCAAAAAACT
TCCCTTTGAATACAGTGCCTTACCACTTTTAGGTTCGGCACCTCTTGTTGCTGCAGGTGGTGTCGCTGGTCATACAAATA
AACTGACTAAAATGTCCCCGGACGTGACCAAAAGCAACATGACCGATGACAAGGCATTAAATTATGCGGCACAACAGGCG
GCGAGTCTCGGTAGCCAGCTTCAGTCGCGATCTCTGAACGGCGATTACGCGAAAGATACCGCTCTTGGTATCGCTGGTAA
CCAGGCTTCGTCACAGTTGCAGGCCTGGTTACAACATTATGGAACGGCAGAGGTTAATCTGCAGAGTGGTAATAACTTTG
ACGGTAGTTCACTGGACTTCTTATTACCGTTCTATGATTCCGAAAAAATGCTGGCATTTGGTCAGGTCGGAGCGCGTTAC
ATTGACTCCCGCTTTACGGCAAATTTAGGTGCGGGTCAGCGTTTTTTCCTTCCTGAAAATATGTTGGGCTATAACGTCTT
CATTGATCAGGATTTTTCTGGTGATAATACCCGTTTAGGTATTGGTGGCGAATACTGGCGAGACTATTTCAAAAGTAGTG
TTAACGGCTATTTCCGCATGAGCGGCTGGCATGAGTCATACAATAAGAAAGACTATGATGAGCGCCCAGCAAATGGCTTC
GATATCCGTTTTAATGGCTATCTGCCATCATACCCGGCATTAGGTGCCAAGCTGATGTATGAGCAGTATTATGGTGATAA
TGTTGCTTTGTTTAATTCTGATAAGCTGCAGTCGAATCCTGGTGCGGCGACCGTTGGTGTAAACTATACTCCGATTCCTC
TGGTGACGATGGGGATCGATTACCGTCATGGTACGGGTAATGAAAATGATCTCCTTTACTCAATGCAGTTCCGTTATCAG
TTTGATAAACCGTGGTCTCAGCAAATTGAGCCACAATATGTTAACGAGTTAAGAACATTATCAGGCAGCCGTTACGATCT
GGTTCAGCGTAATAACAATATTATTCTGGAGTACAAAAAGCAGGATATTCTTTCTCTGAATATTCCGCATGATATTAATG
GTACTGAACGCAGTACGCAGAAGATTCAATTGATCGTTAAGAGCAAATACGGTCTGGATCGTATCGTCTGGGATGATAGT
GCATTACGTAGCCAGGGCGGCCAGATTCAGCATAGCGGAAGCCAAAGCGCACAAGATTACCAGGCTATTTTGCCTGCTTA
TGTGCAAGGTGGTAGCAATGTTTATAAAGTGACGGCTCGCGCCTATGACCGTAATGGCAATAGCTCTAACAATGTACTGC
TTACTATTACCGTTCTGTCGAATGGTCAGGTGGTCGACCAGGTTGGGGTAACGGACTTTACGGCTGATAAGACTTCGGCT
AAAGCGGATGGCACCGAAGCAATTACTTATACTGCGACGGTGAAAAAGAATGGGGTAGCTCAGGCTAATGTCCCTGTTTC
ATTTAATATTGTTTCAGGAACTGCAGTTTTAAGTGCCAATAGTGCCAATACCAATGGTAGCGGTAAGGCGACTGTAACCC
TGAAATCGGATAAACCAGGCCAGGTCGTCGTGTCTGCTAAAACAGCAGAGATGACTTCAGCGCTTAATGCCAATGCAGTT
ATATTTGTTGATCAAACCAAGGCCAGCATTACTGAGATTAAGGCTGATAAAACAACGGCAGTAGCAAATGGTCAGGATGC
TATTACATACACTGTTAAAGTGATGAAGGGGGATAAGCCTGTATCTAATCAGGAAGTGACCTTTACGACGACCTTAGGTA
AGTTAAGTAATTCCACTGAAAAAACGGATACGAATGGCTATGCCAAAGTAACATTAACATCGACAACTCCAGGAAAATCA
CTCGTTAGTGCCCGTGTTAGCGATGTCGCCGTTGATGTCAAAGCACCTGAAGTTGAATTTTTTACAACGCTTACAATTGA
TGACGGTAATATTGAAATTGTTGGAACCGGAGTTAAAGGGAAGTTACCCACTGTATGGTTGCAATATGGTCAAGTTAATC
TGAAAGCCAGCGGAGGTAACGGAAAATATACATGGCGCTCAGCAAATCCAGCAATTGCTTCGGTGGATGCTTCTTCTGGT
CAGGTCACCTTAAAAGAGAAGGGAACTACAACTATTTCCGTTATCTCAAGTGATAATCAAACTGCAACTTATACTATTGC
AACACCTAATAGTCTGATTGTTCCTAATATGAGCAAGCGTGTGACCTATAATGATGCTGTGAATACATGTAAGAATTTTG
GAGGAAAGTTGCCGTCTTCTCAGAATGAACTGGAAAATGTCTTTAAAGCATGGGGGGCTGCAAATAAATATGAATATTAT
AAGTCTAGTCAGACTATAATTTCATGGGTACAACAAACAGCTCAAGATGCGAAGAGTGGTGTTGCAAGTACATACGATTT
AGTTAAACAAAACCCTCTGAATAATATTAAGGCTAGTGAATCTAATGCTTATGCCACTTGTGTAAAATAAATTTAATAAA
TATCTAATCATTGTCCGGCTAAAATGTATCTTTTAGTCGGACATTTTTATGCGATATATTCTATATTAGCACCTTTCGAG
TTGTATCCTGGTAATCAAGTCTCTAGCTAGCTTTTCTCTCCACCCAATAATTTGACATCATGAAGACTATATCTATAACA
TCCACACAATAAAAAACCCTCCGAAGAGGGGGAAGAGGATAAGAAATTAATACGACAGTGGAATATGTATATATTCGTCT
GGGCGGGAGATGTTGATACCATCTTTAGGATCAATTGCGTCGATGACATAGCCTCCTTTCAGAATGCTACCAATCCCGAG
GCTGGTACCATTATCAAGAGCAATTGTAGGATTCTTCATCGTACCGCTGATTCTGAGTATTTTTCCGGGAAAAATATCTG
CTGAAATGTACGGCTGAATGTTCTGAAAGAGTATCTTGACGTTACTATTTTTGTTCATTGCATTTATAATGGCAAGGATC
TTACTCTCGTTCTGTTGAGAAACTTCCCCCGCGACAATGATGACATCATTCTTTTTGAAAATATTGACATAGTTTATTAG
TTTATTCTTTTTAAACTCTGATGCCAGTTCATTGATTTTATTGTTACTGTTGTTGTGTATTTCCCATCCTGCAACCCCTG
GCGTATTCAGTAACAGATTTTCAACCTCGCTCCATTTGGGTGAAGGGGGAATGTATCCCGATAACAGAAAGAACCCAGGC
TTATTACCTTTTGTAATAATGATATCTTTGTAACCGTATTCCGTTAAGACATCATTAATTGCGGATATGATTTGGTTATT
GCAAATGATTTTATTGTAATAAAAAATATTTTTTTCTTTCAGGTAATTAAAAAATGGAGTTAAATCCGTGGTTGATTCGC
AACGCCCATAAAGCGCGATATTTTTTCCATGCCATACCAGAGTGATTGCATGAAGTTTGTTTTCTTTTAGCTGCTGATAT
ACATCAGCTCTGGTAAACGTTGGGGGTTCAGCTTTTGGGGAAAGCAAAACGTAACTGCCGATGGCACCAGACAACGCAAA
AGTAGCACCAATCACGCTCGCCAGGATAAGGCGTTTTTTGCGTTGATTTTTGGCAGAAAACCTTTCTGGCACATCAGACA
ATGGCAAGGAATGGTCAATATCACCAATGATGAAGCAACATCCCGCTATATCAATAATCTTTCCGACAGGTAATGGTTTA
TCTGCTTCATAGGGCGTGGGTTGCCCATCAATCCAAAATTCAACCGGAGATAAAAGGAAAACACCTTCCTCACGTATATC
AAGTAAAAACTGATTGAGGCCTTGTTCAAGAGGAAAGTAAACAATATCGTTATCTTCCGTACCTAGCGTTAGGTTTCCCA
TCGGAAGTTGTAATTCCCGATTACGCATCGCACCATTGAGAAGTTTTATTTTATATGAGGATAACATTTTTAAATTTTAT
TCATCCTGGTGGTTGAACAATGAGAAAAAATATGGTGAACTTACATCGTCTAAGAATAGAGTAGAAAGGAAGCTGTTGTA
CAGTACTATTTAATGGAATATTCATAATTAATGATTACGTGAGTTTCCAATGGCTAATGGTATTGAATTTAATCAAAACC
CCGCATCTGTTTTTAATTCTAATTCATTAGATTTTGAATTAGAATCTCAGCAATTAACGCAAAAAAATTCTTCTAATACT
TCTTCGCCATTAATAAATTTGCAAAATGAATTAGCAATGATTACTAGCTCATCGCTTTCTGAAACGATTGAAGGGCTAAG
CCTGGGATATCGCAAAGGTAGCGCAAGGAAAGAAGAGGAAGGCACGACAATCGAGAAGCTGCTCAATGAAATGCAAGAGC
TGCTTACTCTTACCGATAGTGATAAAATAAAAGAACTATCATTAAAAAACAGCGGGTTGCTGGAACAACACGATCCTACT
TTGGCGATGTTTGGCAACATGCCAAAGGGGGAAATTGTTGCGCTAATATCTTCTTTATTACAATCTAAATTCGTTAAGAT
TGAATTAAAAAAGAAATACGCCAAATTATTATTGGATTTATTAGGCGAAGACGATTGGGAGCTGGCTCTGCTTTCCTGGT
TAGGGGTGGGTGAGTTAAACCAGGAAGGTATCCAGAAGATCAAGAAGCTTTATGAAAAGGCTAAGGATGAGGATTCTGAA
AATGGCGCCTCTTTACTTGACTGGTTTATGGAGATTAAGGATCTTCCTGAGCGTGAAAAGCACTTAAAGGTTATTATTAG
GGCGCTATCGTTCGATCTGTCTTATATGTCTTCTTTTGAAGACAAGGTAAGAACATCTTCAATTATTAGTGATTTATGTC
GGATAATCATTTTTTTATCACTTAATAACTATACGGATATTATTGCAATCTCCATTAAGAAAGATAAAGATGTCATTTTA
AATGAAATGCTATCTATTATTGAACATGTATGGTTAACAGAAGACTGGCTACTGGAGAGCCCTTCTCGGGTATCGATTGT
CGAAGATAAACATGTTTATTATTTCCATTTATTGAAAGAATTTTTTGCATCATTACCTGATGCTTGTTTTATTGATAACG
AGCAGAGGAGTAATACATTATTAATGATTGGTAAAGTGATAGATTATAAGGAGGATGTTATGTGATATTGTTTTTTTTAT
AGTTTTTGTCATGCTAAGAAAGATTATGAAGAGGTATATACATGGATACATCAACTACAGCATCAGTTGCTAGTGCGAAT
GCGAGTACTTCGACATCAATGGCCTATGATTTAGGGAGCATGTCGAAAGATGACGTTATTGATCTATTTAATAAACTCGG
TGTTTTTCAGGCTGCAATTCTCATGTTTGCCTATATGTATCAGGCACAAAGCGATCTGTCGATTGCAAAGTTTGCTGATA
TGAATGAGGCATCTAAGGAGTCAACCACTGCCCAAAAAATGGCTAATCTTGTAGATGCTAAAATTGCTGACGTTCAGAGT
AGCTCTGACAAGAATGCGAAAGCTCAACTTCCTGATGAAGTGATTTCATATATAAATGATCCTCGCAATGACATTACAAT
AAGTGGTATTGACAATATAAATGCTCAATTAGGCGCTGGTGATTTGCAAACGGTGAAAGCAGCTATTTCAGCTAAAGCGA
ATAATTTGACAACGACGGTCAATAATAGCCAGCTTGAAATACAGCAAATGTCAAATACGTTAAACCTATTAACGAGTGCA
CGTTCTGATATGCAGTCACTGCAATATAGAACTATTTCAGGAATATCCCTTGGTAAATAACCGGAGATAACTATGCTTAA
TGTAAATAACGATATCCAGTCTGTGAGGTCTGGAGCCAGTGCTGCTACGGCTACTTCAGGTATTAATCAGTCTGAAGTGA
CTTCCGCGCTGGATTTACAACTGGTTAAATCCACGGCCCCATCAGCAAGTTGGACAGAAAGTACCGCTTTACCAACGCCA
CCGGCAGGTCACTCATTAGTGACGCCCTCTGCTGCTGAGGATGTCCTGAGTAAGCTGTTTGGTGGTATTAGTGGTGAAGT
TACGAGTCGAACAGAGGGAACAGAACCACAGCGCAGCACTCAGAATGCAAGCTCTGGCTATCCTTATCTTTCTCAGGTGA
ATAACGTTGACCCTCAGGCCATGATGATGATGGCCACTCTGTTATCCCTGGATGCCTCAGCGCAGAGAGTTGCGAGTATG
AAAAACTCCAACGAGATCTACGCGGATGGACAAAATAAAGCGCTGGATAATAAAACGCTGGAGTTTAAAAAGCAGCTCGA
AGAACAACAAAAAGCCGAAGAGAAAGCACAAAAAAGTAAAATTGTTGGTCAGGTCTTTGGTTGGTTAGGGGTTGCAGCAA
CTGCTATTGCAGCTATTTTTAACCCGGCACTCTGGGCTGTTGTTGCTATTAGTGCAACAGCAATGGCACTGCAAACTGCA
GTTGATGTTATGGGCGATGATGCTCCACAGGCGTTAAAAACAGCAGCGCAAGCTTTTGGCGGTCTATCTCTTGCCGCAGG
TATTCTGACAGCCGGCATTGGCGGGGTGTCTTCACTTATATCTAAAGTTGGCGATGTCGCTAACAAAGTTGGTTCAAACA
TCGTAAAAGTAGTCACTACGCTGGCCGACACTTTTGTTGATAATGTTGCATCGAAAATTTCGGCAGTGGCAAATGGTTTA
ACTACTTCTTCGCGCTCTATTGGTACAACTGTGCTGAATAATGACGCAGCGTATTATAATGTGTTATCACAGGTTTCTGC
TTTTGCTGTGGAAAATTTAACTCGACAAAGTGAGTACTTAAGTCAGAGTGCGAAGGCAGAGCTGGAAAAAGCTACTCTCG
AGCTGCAAAACCAGGCGAATTATATACAGAGTGCTTCTCAGCTGATGTCTGATTCTGCGCGAGTGAATATCCGTATTGTC
AGCGGTCGAGTTTAATTATTAAAGAGGCGTTTATTATGAATACTATCGATAATAACAATGCGGCAATCGCAGTTAATTCT
GTTTTGAGCAGCACGACTGACAGCACCAGTTCAACAACTACATCAACTTCGTCAATCAGTTCATCTTTACTTACTGATGG
CAGAGTGGATATTTCTAAACTTCTGCTGGAGGTTCAAAAACTGTTGCGTGAGATGGTCACCACATTGCAAGATTATCTTC
AGAAGCAATTGGCGCAAAGCTATGACATCCAAAAAGCCGTTTTTGAGAGCCAAAATAAAGCTATTGATGAGAAAAAAGCC
GGTGCGACAGCCGCTCTGATTGGTGGTGCTATCTCATCTGTCCTGGGGATTTTAGGCTCTTTTGCTGCCATTAATAGCGC
AACTAAAGGCGCGAGTGATGTCGCTCAGCAAGCCGCTTCTACTTCTGCGAAGTCTATCGGTACAGTCTCTGAAGCTTCAA
CTAAAGCACTGGCGAAGGCTTCCGAAGGTATTGCAGATGCAGCAGATGATGCAGCTGGCGCAATGCAGCAAACTATCGCG
ACAGCTGCAAAAGCGGCCAGTCGTACATCCGGTATCACTGATGATGTTGCTACTTCGGCTCAGAAAGCTTCTCAGGTAGC
TGAAGAGGCTGCTGATGCTGCTCAAGAATTAGCACAGAAGGCAGGATTATTAAGTCGCTTTACTGCTGCTGCCGGAAGGA
TTTCCGGTTCAACGCCATTTATTGTTGTTACCAGCCTTGCTGAAGGTACGAAAACATTGCCAACAACGATATCTGAATCT
GTCAAGTCCAATCATGATATCAATGAGCAGCGTGCTAAATCTGTAGAAAATCTTCAGGCGTCGAATTTAGATACCTACAA
ACAGGATGTTCGCAGAGCGCAGGATGATATCTCTAGCCGTCTACGTGATATGACAACGACAGCCCGTGATCTTACTGACC
TTATTAATCGCATGGGGCAAGCGGCTCGCTTAGCTGGGTAATTGATCATGGTCGATACGTTTAATGATGAAGTGTTTAAT
TACTATCTTGAACAAAAAGGGTACACAATACAGAAGGAGTTTCTTTGTGGCAGTGCCTTTTTTATCGGATGGCGGATTGA
GACACCTTTTTTTTCATTAGCGTACAGACTGGATGAACAAGAACTGATTTTGTGCTCTTTTGAAGCACGTAACCAAACAG
GGCTTAACGGCCCTGTTTTATCACTGACTCGTTTGCTCGAAGAGTTGTATCACCACTTTTCGGGTATTAAGAAAATCAGT
GCGATGAAATCTAAGATTGGTTCAGATTCAGAACGTCAAAAGCGCGAAGAGTTGTTTAATTACTTCATCAGAAAGGGTGC
CGTGCAGCAAGAAACAGAAGACGGAATTTGGTTCGTAATGAACGTAAATAGTTAAAAAAAAATTATTTTATTAACTTCTG
AGGGAAATTTAATGAATTTATCTGAAATTACTCAACAAATGGGTGAAGTAGGTAAAACGCTGAGCGATTCTGTGCCAGAG
TTACTTAATAGCACCGATTTGGTTAATGACCCTGAAAAAATGTTAGAGTTGCAGTTTGCGGTTCAGCAATATTCTGCTTA
TGTTAACGTAGAAAGTGGAATGTTGAAAACGATAAAAGATCTGGTCTCAACCATTTCTAACCGTAGTTTTTAATTTTTAT
GGTTAATGATATTTCTGCTAATAAGATACTGGTGTGGGCGGCTGTAGCTGCGGCAAACCATAAGCTTCCCAAATATGCGG
AAGCTATCCTGAATGTATTCCCACAAATTATACCTGATAAAAAAGATATCGCACATTTAGAATTTATTATCTTATTTGGA
TTAAATAGAAAAAATGATGCGATAAAGGCTTTGGAGGGCTGTATGGATGATGAGTCGAGTCAGTTATTGTACAGTTTGTT
CCATGAGAATGTTAGTGGTTGGGTACGAGGATTTTAATTTATTTTGATTTAAAAATCATTTTATTATTCGTTTTGATATA
TATGAGAGTTAGCCAAGATTAGATATAAAGAGGCATAAATTATGCTTAATGGAATTAGTAACGCTGCTTCTACACTAGGG
CGGCAGCTTGTAGGTATCGCAAGTCGAGTGAGCTCTGCGGGGGGAACTGGATTTTCTGTAGCCCCTCAGGCTGTTCGTCT
TACTCCGGTGAGAGTTCATTCCCCCTTTTCTCCAGGTTCGTCGAATGTTAATGCGAGGACGATTTTTAATGTGAGCAGCC
AGGTGACTTCATTTACTCCCTCTCGTCCGGCACCGCCGCCACCGACAAGTGGACAGGCATCCGGGGCATCCCGACCTTTA
CCGCCCATTGCACAGGCATTAAAAGATCATTTAGCTGCCTATGAACTATCGAAAGCGTCTGAGACTGTAAACTTTAAGCC
AACCCGTCCGGCACCGCCGCCACCGACAAGTGGACAGGCATCCGGGGCATCCCGACCTTTACCGCCCATTGCACAGGCAT
TAAAAGATCATTTAGCTGCCTATGAACTATCGAAAGCGTCTGAGACTGTAAGCTTTAAGCCAACCCGTCAGGCACCACCG
CCACCGACAAGTGGACAGGCATCCGGGCCTGGTGGACTACCGCCCCTTGCACAGGCACTAAAAGATCATTTAGCTGCCTA
TGAGCAATCGAAGAAAGGGTAACCAACTAATTTAAAACGATTAATCGGTATTGATTATTTGTTTTCCAACTAATAAAAAC
CGATATCAAATTGCGTGGTAATAAATGTGATTAGTAATATCGGTTTTTATTGGAGGGGTAATAAATAATGTATTATTATA
CGGTGAAAGTGGAGAAAGAGACGTTTTGTTAAAAGCGCACAGAGCTCAAAAGTCTGTTCGCTATTGATTGTGATAATCTG
AAAGGCAGTAAACTCAGGTATACTGGCAATAGCGGACACCACCATTTGTTCTTTTTTTACGCAGTTATCTGGTTATATTT
TTCCTGAAGGCTACTAGGGAGATATTCCCCAGACGGGAGTGGCGGCGCTGATGGTTGTAGAAAATCTCAATGTATTTCCG
TATTACTTAGATGGCTTCATCCCGGTTATTAAAACGATAGTTTCATTCTTCAGCGTTTACTATAAGTTTTTCATTGAGGT
GTTGTCGTAACGGTTACCTTTACGCGGCATGGATGTTTTCAGACCAAACCGCTCCTGTATAGCCCGGTAATCGTGTGTGT
AGTACTGCGAACCACGATTGGAGTGGTGGATTAGCCCGACTGGTGGGCGTTGCATTTCCCGGCGTTACCATACGTTTTTG
CTGCCCACGTAGTTTCCTGTCCGCACCGATTTTGAGATTTTTCCTGATATCCTCAATGCCCCCTTGTATAACAAAGATGC
TGTTAAAAACCATTGTTATGTATTACCTTTTTCCTATTATGGGAGGCTAATATTTCAAGAGGAAATAATACCCCCTAAAG
TATCCCCAAAAGCAACTTGATACAGGTTGAGTCGATTGATCTCTGGACACAAAGAAAGCCTGATATATAAGGGATTAGAA
GGGGTTTTGTTAACGTCGGGAGAGTTCAGGAGAGGCATTTTGGCGGAAGATCACAGGAGTCGAACCTGCCCGGGACCGCT
GGCGGCCCCAACTGGATTTGAAGTCCAGCCGCCTCACCGGAGACGACGATCTTCCGCGCCTCGATTGCTACATGGAGGCG
GGGCGCATTATAGCTACTTCCTTGAGTTTCTACATCCCCCAGATCAGTTTTTTCCGCCTAATACACGCAGCGTATTATCA
CGAAAACATTATAGTTCATATAAAACTCATATTTTACAATGATATATGAGCGAAATTAACGCTACCACGATCACATAAAA
CAAGAATCATAAATTAATAACCAGATATCGGAATATTCGCTCTCGCAGGGATGGTTTACAAAATGCGTTATCGGTCTCAG
CACCCCTATAGCATCAAGGAAAAGCAGATGAAGAGTGAAGTGTTGTCCGTTAAAGAGAAAATTGGTTATGGCATGGGAGA
CGCCGCCAGCCACATTATTTTCGATAACGTAATGTTATATATGATGTTCTTTTATACCGATATTTTTGGCATTCCTGCCG
GATTTGTCGGAACCATGTTTTTGGTCGCTCGTGCACTGGATGCGATTTCCGATCCTTGCATGGGGTTGTTGGCCGATCGA
ACGCGCTCTCGCTGGGGTAAATTTCGGCCGTGGGTGCTGTTTGGCGCACTGCCATTCGGGATCGTCTGTGTACTGGCCTA
TAGCACGCCAGATCTCAGTATGAACGGAAAAATGATTTATGCAGCAATTACTTATACCCTACTTACCTTACTTTATACCA
TCGTCAATATCCCTTACTGCGCATTGGGTGGTGTAATCACCAATGACCCGACTCAGCGTATCTCGCTGCAATCCTGGCGT
TTTGTGCTGGCGACCGCGGGAGGCATGCTCTCTACTGTTCTGATGATGCCACTGGTTAATTTAATTGGTGGTGATAATAA
ACCACTCGGTTTCCAGGGCGGTATCGCGGTCCTTTCCGTGGTGGCATTTATGATGCTGGCATTCTGTTTCTTCACCACTA
AAGAACGCGTTGAAGCACCACCTACAACGACGTCTATGCGGGATGATTTACGTGATATCTGGCAAAACGACCAGTGGCGT
ATTGTCGGTTTCCTGACAATTTTCAATATCCTGGCGGTGTGCGTACGCGGTGGGGCGATGATGTATTACGTCACATGGAT
TTTGGGTACGCCGGAAGTGTTTGTCGCTTTTCTCACCACTTATTGCGTGGGTAACCTGATTGGTTCCGCACTGGCGAAAC
CGCTGACCGACTGGAAATGTAAAGTCACTATCTTCTGGTGGACGAACGCCCTGCTGGCAGTGATTAGCCTCGCGATGTTC
TTTGTTCCTATGCAGGCCAGCATCACCATGTTTGTCTTCATCTTCGTGATTGGTGTGTTGCATCAACTGGTGACACCTAT
CCAGTGGGTAATGATGTCCGATACCGTCGACTACGGCGAGTGGTGCAATGGTAAACGCCTGACCGGGATCAGTTTTGCTG
GCACGCTGTTTGTGCTCAAACTGGGGTTGGCCTTCGGTGGTGCCCTTATCGGCTGGATGCTGGCTTATGGCGGATATGAT
GCGGCAGAAAAAGCGCAGAACAGCGTCACAATTAGCATCATTATCGCGCTATTCACGATTGTTCCGGCGATCTGTTACTT
GCTGAGCGCGATTATCGCTAAACGCTACTACTCACTCACGACGCACAATCTGAAAACCGTTATGGAACAGCTGGCTCAGG
GCAAACGCCGTTGCCAGCAACAATTCACCTCTCAAGAAGTGCAGAACTAAGGAACGGCAATGAAAATTAGCGACGGAAAC
TGGTTGATTCAACCTGGCCTCAATTTGATTCACCCGCTTCAGGTGTTCGAGGTTGAACAGCAGGGTAATGAAATGGTGGT
CTATGCTGCCCCCCGTGATGTGCGTGAACGTACCTGGCAGCTTGATACACCTTTATTTACGCTGCGCTTTTTCTCCCCAC
AGGAAGGTATTGTTGGTGTACGGATTGAGCATTTTCAGGGGGCGCTGAATAACGGTCCTCATTATCCGCTCAATATTTTG
CAGGATGTGAAGGTCACAATCGAAAACACAGAACGTTATGCTGAGTTTAAAAGTGGCAACTTAAGCGCGCGTGTCAGCAA
AGGTGAGTTCTGGTCACTGGATTTTCTGCACAACGGCGAACGTATTACCGGTAGTCAGGTGAAAAATAATGGCTACGTGC
AGGACACGAATAGTCAACGAAATTATATGTTTGAGCGGCTGGATCTTGGCGTTGGCGAAACAGTTTACGGTCTGGGAGAG
CGCTTTACTGCCCTGGTGCGCAATGGCCAGACGGTAGAGACCTGGAACCGGGACGGCGGCACAAGTACTGAACAGGCGTA
TAAAAATATTCCGTTCTATATGACTAACCGTGGTTATGGGGTACTGGTCAATCATCCTCAATGCGTCTCTTTTGAAGTGG
GATCGGAGAAAGTCTCCAAAGTGCAGTTCAGCGTTGAGAGTGAATATCTCGAATACTTTGTTATCGACGGCCCGACGCCG
AAAGCGGTACTTGATCGTTATACCCGTTTTACTGGTCGTCCGGCGCTGCCGCCCGCGTGGTCCTTCGGCCTGTGGCTAAC
CACTTCATTTACCACCAACTACGACGAAGCGACGGTAAACAGCTTTATCGATGGTATGGCGGAACGCAATCTGCCACTGC
ATGTTTTCCACTTTGACTGTTTCTGGATGAAAGCCTTCCAGTGGTGCGATTTTGAGTGGGACCCGCTGACTTTCCCGGAC
CCGGAAGGGATGATCCGCCGCCTGAAAGCGAAAGGGCTAAAAATCTGCGTCTGGATTAACCCCTATATCGGGCAAAAATC
CCCTGTCTTTAAAGAGTTACAAGAGAAAGGCTATTTACTCAAACGCCCGGACGGTTCGTTATGGCAGTGGGATAAATGGC
AGCTAGGTCTGGCGATTTATGACTTTACCAATCCGGATGCCTGCAAATGGTACGCCGACAAACTGAAAGGTCTGGTCGCG
ATGGGCGTTGATTGCTTTAAGACCGACTTTGGCGAACGTATTCCAACCGATGTTCAATGGTTTGATGGTTCCGAGCCGCA
GAAAATGCATAACCATTATGCGTACATCTACAACGAACTGGTGTGGAACGTGCTCAAGGACACCGTTGGTGAGGAAGAAG
CCGTCTTGTTTGCCCGCTCGGCCTCCGTCGGTGCGCAGAAATTCCCGGTACACTGGGGTGGTGACTGTTACGCTAACTAC
GAATCAATGGCGGAAAGCCTGCGCGGTGGTTTGTCTATTGGCCTTTCAGGTTTTGGTTTCTGGAGCCACGATATCGGCGG
CTTTGAAAATACCGCTCCGGCGCACGTTTACAAACGCTGGTGCGCGTTTGGTTTGCTTTCCAGCCATAGCCGTTTACATG
GCAGCAAATCTTATCGTGTGCCGTGGGCCTACGATGATGAGTCCTGTGATGTGGTGCGCTTCTTCACGCAACTGAAATGC
CGCATGATGCCGTATCTGTATCGTGAAGCTGCACGTGCAAACGCGCGGGGTACGCCGATGATGCGGGCCATGATGATGGA
GTTCCCGGACGATCCGGCTTGTGATTACCTTGACCGTCAATACATGTTAGGCGACAACGTGATGGTTGCGCCTGTGTTCA
CTGAAGCGGGCGATGTGCAGTTCTACCTGCCGGAAGGTCGCTGGACACACCTGTGGCACAACGATGAACTCGACGGTAGT
CGCTGGCATAAACAGCAGCACAGCTTCCTGAGTCTGCCCGTTTATGTGCGTGATAGCACCCTACTGGCGCTGGGCAACAA
CGATCAACGTCCCGATTACGCGTGGCACGAAGGTACGGCATTCCACCTCTTTAATCTGCAAGACGGGCATGAAGCCGTCT
GTGAAGTGCCCGGTGCTGACGGTTCGGTGATCTTTACTTTAAAAGCAGCACGTACTGGCAACACGATTACTGTGACTGGT
ACGGGCGAGGCGAAGAACTGGACACTGTGCTTGCGCAATATTGTGAAAGTAAATGGTCTGCAAGGCGGTTCGCAGGCTGA
AAGTGAGCAGGGACTGGTGGTGACTCCTCAAGGGAATGCGCTGACAATTACGTTGTAATCTATTGAAGAATGCCGGATAC
GAATGGTTTTGTGTCGTATCCGGTAAATAATCTCACATCTGGTAATAAATATTTCTTCCATCGTATTTGCGAGCATGATC
ACGATTATTCATCACGAAAATGTGATCTGTGCTGAAAAATATCCCTTAACCGCCTTGCTTTGTTTTATCACTGTCCGGAT
TACGGACAGATTTTAGTATTGTTGTGAAATTATTCTGCTTTATATTTACCCTCAGAGATGGCAACTGAAGCTCTTCCATA
TGGGGCTTCTTAATCTGTGATAAGGGTAAAAAATGCAAATGATTACCTCGCGACAAAACAGATTATTACGATTCCTTTTA
CCTCGAAGGGAATATACGACTATTGTTACGATTGCCGGCTATTTAAATGTTTCGGAAAAAACCATTCAACGTGATTTACG
TTTACTTGAGCAATGGCTGGGACAATGGAGAATAAATGTTGAGAAGCGTGCTGGCGCGGGTGTGATGTTAAGCGCGGAGA
ATATTGCTGATTTGCTGCATCTTGATCATTTGTTGGTGGCAGAATGTGAAGAGATTGATGGTGTAATGAATAATGCCAGG
CGCGTTAAAATAGCGTCGCAGTTATTAAGTGAAACACCGAATGAAACGTCGATCAGTAAATTGTCAGAACGCTACTTTAT
CAGCGGAGCCTCTATTGTTAATGACCTGAGAGTAATTGAGTCCTGGCTTGCGCCGTTGGGGTTATCGTTGATCCGCAGTC
CAAGTGGTACGCATATTGAAGGTAGTGAAGGGCAAGTCCGACAGGCAATGGCATTACTGATTAACGGCATTATTAACCAT
AATGAGACGCAAGGTGTCGTGTATTCACGTCTGGATCCCGGAAGCTATAAAGCATTAGTCCATTATTTTGGAGAAGAAGC
GGTGTTATTTGTCCAGTCATTGTTACTGGATATGGAAAATGAATTAAGTTGGTCTTTGGGAGAACCTTATTACGTTAACA
TTTTTACTCATATCCTTATTATGATGTATCGCAACACGCACGGGAATGCGTTATCAAGAGAAGAAGATCAAACCAGGCAA
TATGATGAAAATATCTTTAATGTTGCCAGTCAGATGATTCATAAGATAGAACAACGAATTGCACATACATTGCCCGATGA
TGAAGTCTGGTTTATTTATCAATATATCATTTCATCAGGTGTGGCGATTGATGGACAAAAAGATGTTAGCATTATTTCAC
ATATGCAGGCCAGCAATGAAGCGCGTCTGATTACCTGGCGTTTAATTACGGTATTCAGTGACATCGTGGACTGCGATTTT
AGTGAAGACAGCGCATTATATGATGGCTTATTGGTGCATATTAAACCGCTGATTAACCGACTAAATTATCGTATTCATAT
CCGTAATCCATTGTTGGAAGATATTAAAGCAGAACTAGCGGATGTCTGGCGGTTGACGCAATATGTGGTGAATCAGGTAT
TTAAAACCTGGGGTGAGAATGCAGTGAGCGAGGATGAAGTAGGTTACCTGACCGTTCATTTTCAGGCTGCGATGGAGCGG
CAAATTGCCCGTAAACGCGTATTACTGGTCTGTTCAACCGGAATCGGAACTTCGCATCTACTGAAAAGCCGTATTCTGCG
AGCATTTCCTGAATGGACGATTGTTGATGTTATTTCAGCAGCGAATTTATCACAGGTTTTGCCTGACAATATCGAACTGA
TTATTTCGACCATTAATTTGCCTACAGTCACTATGCCGGTCGCTTATGTTACCGCTTTTTTTAATGATGCCGATATTAAG
CGGGTCACTGAAATGGTGATTACGGAAAAATTACATCATGCGACATCTCGGGTCGTTGAAATTTAATGTCAGAATTTTAT
GAGGTATGACGAATGGACATAACAAAAATCCTGAATACGAATCGCGTTATTTTAGATATGCAAGCGACGAATAAAGAGGA
GGCGATTGAAGAATTAACTAATCTTCTCAAAAAAGATGGTGCGATCGATTGTCGGGAAACCTTTATTAAAGATGTCTGGC
AGCGCGAAGCGGAAGGCTCGACTGGTTTTGAAAATCATATTGCGATCCCGCATGGTAAATCTTCAGCTGTGATTAATACT
ACGCTGGCAATTGGCCGTACCCGGCAGGATATTCCCTGGGAAACGCTGGATGGCAGTAGCGTGCGCTGTATTATTTTATT
TGCGGTACGTCTTGAAGATCAAAATACCACCCATATCCGTTTACTTTCCCAGGTCGCGGGCGCACTGGCGGATGATGACA
TCATAGAACAATTGTTAGTTGAGACGAGTCCGCAAAAAATCATTGATCTCTTTAGTCAGTATGCACAATCCGATGTCTGC
TAAATAACAGGGAGTATGTCATGAATATTGTCTGTGTTGCCGCCTGTACGGCGGGTATTGCTCATACCTATATTGCTCGT
GAAAAGTTAATCAAAGGAGCAAAAGCTCTGGGTCATACCATTAAAGTTGAAACCCAGGGAACCATTGGTACAGAAAATGA
ATTACAGGCGGCAGATATCTCTGCTGCTGACGTCGTGATTCTTGCTGTAGATGTGAAAATAAAAGGAGAAGAACGCTTCA
CCAATAAACGTATTGTGCGAGTAAAGACAGAGATCGTCATTAAATCGCCCGTTCAATTTCTTGAAAAGGTCGAAAAATCA
CTGGGAAACAAATGATCCTTATACTGGAGGGATCTTAATATGAAAGACAATAAAATTCCGGTTTCACAGGAAATTAAAAA
ACATTTATTAACCGGCATCTCGTGGATGATACCCCTTATTGTGGCCGCCGGGATATGTATTGCGTTGGGGCAAGTTCTTG
GCGGTACAGATGTTGGTGAAAAAACAGGAACAATCCCGTGGATGCTTAATCAGATTGGCGGCTGGGGAATGGGGCTGATT
GTGCCGCTGATTAGCGCGGCAATTGCCTATTCTATTGCCGATCGTCCCGGATTTGCCCCAGGCCTGATTGTCGGCTTTCT
CTGCGGGCAAATCCATACCGGATTTATTGGCGGTATGTTGGGTGGTTTCCTGGTGGGCTACACCATTTTGCTACTTAAAC
GCTATATCCGCCTGCCGCAGTCGATGCAAGGACTCATGCCAATCATGGTGTTGCCGGTATTAAGCACCATTATCGGTGGG
CTGTTAATGATGACGCTGATTGGTAAACCCATCGCCTGGTTACAAGAAGCACTGATTCATTTGCTCGAGTCGATGCAGGG
CGGATCGCGCTTCCTGATGGGGGCCATACTTGGCGCGATGGCAACCTTCGATTTCGGTGGTCCGGTCAACAAAACCATGT
CGCTGTTTTCCGATGGCTTGCTGGTCAGTGGCGTCTACGGACCAGAAGCCGTGAAATTTGTCGGCTCAATCATCCCTCCG
TTTGGCATCACACTTTCGTTCTTACTGACACGCCATAAATACACCCGTGCGGAGCGCGAGGCGCTGAAAGCCGCGTTTCC
GATGGGGATCTGCATGATCACTGAAGGAGTCATTCCGATCGCCGCGCGTGACCTGCTGCGAGTAGTGGGATCTTGTGTGG
TGGCATCGGCGGTCGCGGGCGGCTTAATCATGGTGTGGGGCGTGGAGAGTCCGGTTCCGCATGGCGGCATGTTTGTTGTG
CCTCTGTTCACCCATCCTCTGCTGTTTTGCCTGGCGCTGGGTATAGGCACGGTGATTTGTGGCGTGATGCTTTCACTCTG
GAAGAAACCGGTAACGGAACGCGACGAAGAGTTTGACGAACTGAGCGATCAAAAGCTGAAAGATGAAGAGATCACTTTCA
CCCTCGAATAACCGGAGGCCCTATGTTTGCCGATATGAAAAGTATGGTGATGAAAGCCTGGCATGAACATTACGCCTTGC
TGGCGATCAACTGTATGAATCTGGAAAGTGCTCACGCAGCTATCCGCGTGGCGGAGAAGAATCGCGCTCCGATCATTCTC
AATCTCTATCAGGGGCATCTGGCGCATTTTCCTGCACCCGTCGCGGCGGCAGTGGTTAAAACGCTCGCGGAATCTGCCTC
AGTACCGGTCACTCTGGCGCTTGATCATGGCAAAAATCCGGACTGTATTCGTCAGGCGTTTCGTGCTGGTTTCAGCGGAT
TAATGATTGATGCTTCTGCTTTTCCCCTGGAGGAAAACGTGCGCCAGACCAGGGCGGTGGTGGAACTCGCCGCCAGCGCG
CAGCTCTGCGTGGAAGGCGAACTGGGCCATCTGGCAGATGCGCCGCGTTACGACCAGGCCGCCAATGCAGACCTGATGAC
GCAACCCACTGATGTGGAACCGTTTATCGCGCAGACAGGCATTGATCTACTGGCCGTCTCGGTAGGCACGGCGCACGGCA
TGTACGCGCCTGGTGTTGTACCTGCTATTGATTTTCAGCGTCTGGCGGAGATTTTCCACTGCTCGAGCGTGCCTCTGGCA
TTACATGGCGGTAGCGGTACGCCGTTCGATCAGCTCCAGCTCTGTACGACTCTGGGGGTAGCAAAAATCAACGTGGGGGC
GGCCATTTTTGAACGGGGGAAATCCGCGCTCCTGCATACCCTCTGTCACGATATATCCATTGAACTGGTGGACGCGCTGA
AAGCTATGGAACTGGCCTTCGAAGAAGCGATTACACCGTATTTACAGGCGAGCGGCGCTATTGGCAAAGCCTGATTCATT
TTCTGTCATGGCCTTTATGCCAGTGCAATAACGCACCGGCAGGGCGGACTACACGCTGAAACTGGAGATTTAACATGTTA
GTTTCGATGAAAGAATTACTGCAACCTACCCGCCAGCACGGCTTTGCCATTGGCGCATTTAATGTGGCGGATAACTGTTT
CCTTCGCGCAGTCGTGGATGAAGCAGAAGCGACAAATACTCCGGCGATTATTGCCATCCATCCCAGCGAACATGATTTTG
TGGGCGATGCCTTTTTCGCTCACGTTCGCGAAATTACCCAGCGTAGTCCGGTCCCGTTTGTACTGCACCTCGATCATGGT
GCCTCTGTAGAGCATGTTTTGCGTGCGATTCGCTGCGGATTTACCTCAGTAATGATCGACGGTTCGCTGCTGCCGTATGA
AGAAAACGTGGCGCTGACCGCAGAAGTGGTTCGCCTCGCTCACGCGGTTGGCGTGTCGGTTGAGGGTGAACTGGGAACCA
TCGGACAAACAGGAACGTCGGTAGAAGGTGGTGTTTCACAAGTGACCTACACAGATCCGGCGCAGGCCGCCGATTTTATT
GCTCGTACAGGTGCTGACACACTGGCTGTGGCGATTGGTACAGCGCATGGCATCTATCCTAAAGGGATGCAGCCGAAGCT
GCAAATGGACATTTTGCGCGACATTGCCGGACGTATTGATATTCCGCTGGTACTACACGGTGGTTCGGCAAACCCGGACG
CGGAGATTGCTGAATCAGTTACGCTCGGCGTCGGCAAAATCAATATCTCCAGCGATATGAAATACGCCTATTTCCAGAAA
GTGCGTGAAATTCTCGCTAAAGAGAGCTGGTGGGACCCGAACGTCATCTATCCGGATGCGATTAACGCGGCGCGGGAAGT
CATTCGCCACAAAATGAAACTGTTCGGTTCGTTCGGTAAAGCATCACTGTACTAAGCCAGAAGGGCGGGGTGACCCGCCT
TTTACGCAACAAGGAACGAGATATGCACTATCTGGGGTTGGATATTGGTGGGACCAAAATCGCCGCCGTTGTCATGGATG
CGCATGGCTGGGAGATTCGCCGTTACCGCTGCCCGACGCAAAAGTCGACATATCAACAATTTGTCTCATGCGTTGTGGCG
CTTATCGAGCAGATTAGGCGGGACGTTCAACGACCGATGCTGACAGGGATCGCCTTACCCGGCAGTATCTCGCCACTCAC
TGGCCTGATTAAAAACGCGAATATTCAGGTGATTAACGGTCATGCGTTACAGGCTGATTTGCAGCAATTGCTTGGGCAAC
CGGTGGTGATAGCCAATGATGGTAACTGTTTCGCGCTATCAGAAGCTTGCGACGGTGCCGGGCAAGATTATGACGTGGTA
TTTGGTATTACGCTTGGTACGGGCTGCGGCGGTGGCATTGCCATCAAGCAACGACCGTTTATAGGGGCCTGGGGAAATGC
TGCCGAATGCGGTCATATCACGTTGCCAGGCTATACGGAGCAGGAAGATGGTCCATCAGTCAGTTGCTATTGCGGCAAAC
ACAACTGCGTGGAGTCGTTTGTTTCCGGCAGCGGTTTTAGTGAACGCTATCAACAGATGACTGGTAACTTGCTCACTCCT
GCGGCGATTGTCACCCTGGCACAACGTGGTGATGCTTGTGCCATGCAGCAGGTGGCACGTTTTCGCCAACAGCTTGCCCG
CACGCTGGCAACCATCGTTAACGTTGTTGACCCTGGCGTGATTGTGATCGGCGGCGGGCTTTCGAATGTGGAACTGCTTA
TCACCGATCTGAACGCAGAAGTCGCTCCACTGGTTTTCACCGATCAATTCACCACTCCCATTGTAAAAGCACAGCACGGC
GACAGTAGCGGAATGCGTGGCGCTGCCTGGCTTGCTATGCGCAACGGAGAAGCCAATGAAACGTTCACAAATTAATTATG
TTATTGATAAAGCACATGCCATTGCGCAGACCTTCCGCGTTTGTTTGCCAGAGTTCGCCTATTTTACGGTGGATGACTGG
CTGCAGCGGGAACGGGATAACTGGCAAGAAGTGGTCGACTTACAGCTCGGTTGGGATATCACCGATTTTGGTCGTGGTGA
TTTCAACCAAACGGGACTAACACTGCTAACGATGCGCAACGGCGCGCTGGGGTCGGCGGCATATCCAAAACCGTATGCTG
AGAAAATGTTGCAGATCCAACAAGATCAGCAGACTCCCTGGCATTTTCACACCCACAAAATGGAAGATATCCTCAATCGG
GGCGGTGGAGACTTATGCATGCAGTTGGCCTGGGCCAACGAAGCCAATCTCTGTGATGATCAACGAGTCATTACCGTGAG
TGTTGATGGTCAGCGGCGTACCATGAAACCTGGTGAAACGCTGGTGCTAAAGCCGGGGCAGGGCATTTGCCTGCCGCCGC
GTCTGTATCATCGCTTCTGGGCGGAAAAAGCGTTTGTTCTCGGCTGGGAAATCTCGATGGTAAATGATGACCAACACGAT
AATTATTTTCTTGAGCCGGGAGGACGTTTTCCGGCGATAGAAGAAGATGAACCGGTGAAATGGTTATTGTGCAGTGAGTA
TGGAATTTTGCGCTAATAACGGGGAACGCTAGCGCTGATATCCGCTAGCGTCCTTATTTTTACTGCACCGGCTCCGTCGA
CGTAACTTCACCACTGGAAACTACGCCCGCATTCATGGTTTGAGTCACTTGCTGCTTTGCGGCATTCACGGCATGCAATT
GCCCGCTAACCGTAGGTTTCAGCGGGACATTGACCTGAAGATCGCCACTGGCGGTAAGCTGAATATTGCCGTCGCCAGTC
AACGGTAATTCAGGCCATCCCCAATGTTGCAAAATATTCACCGGCACACCGCGTCCATTCAGGCTGATATGGGTCTGACG
TTGTGGCGTTTGTGAAACACTGGCGGTGGCTTCCAGAATGCCTTTTTCAGTAAATGCACTCAGTTCGCTGATATTCACCG
TGCTGCTGTTGGCAGTTAGCGCCAGCGACGGACGACGGACATCAACACGATTAAACGTTGCGGCGGCGGCATTCAGATTC
GCCGAGCCACTCCAGACGCCCCATTTATGATCGGTAACCAGCGTCAGATTGGCACCGTAACCATCGAGCGCGGTGAGCTG
CCACGGGAAGTCAGGGTCGATATCAATGATCAGATTGCGGCTGGCGCTAAATCTCTTCAGTTGCAGGCTGTTTAACCAAC
CGGGTGTCGTTTCCATCCACAACTGTTGCCAGTTTTTGGGCAAGGTATATTCCAGTCCGGCAATTGCCGCATCATCGAGG
ATCAGCGTTTTCCCGTCGCGTTGCCAGTTTCCTGACGTTCTGACCATACCCCCTTCCCAGCGGCTGGTGAACTGGCGCAG
TGCTACGCCCTGCGGGGAAAATTCCGCGTTTATAATCGGATCAAATAAATGCAGCGAGCCATAAATAAACTCGCTGGCGT
TCATCGACAGTTTACCTTCCTGTGTCTGCCAGTCATCTTTACTGAAGGTCATGTTGCGCAAGCTGAGATCGAGGTCGGCC
ACCGCCCAGTCCGGACCTTGCAAACGAGCGTCGATGACTTCCAGGCGACCAATCTGCAACGACGGGACAGAGCGTAATGG
TGCAAAGAAGTCGGTTAGCGATTTTTCGCTTTGTAGACGGATATCCGCCATGCGCAGGTTTTCCACTTGCCAGCTGCCGT
CAGCGTTACGCTGCGCGTTTCCGGTTAATGTCCCGCGGGCGATGTCGGCACCCAGGTTAGTCAGCGTAACGCGATCGTTA
TCAATACTGCCTTCAATCAGTACATTGGTGGCAGGAACATCATTGAGCGAAAGCGATCCGGCACTAAACTGAATCTGTGC
CTTCGTACCCAGCACTTTACCGGCTTCTGGTGACCACGGAACCACGCCGCCATTTACCCGCTGCGCGCTCAGTTTCCATT
CGCTATTCGGGCTATTAAACGCCATATCACGCAGTTGCAGACGATCGGCTTTGAACGGTAGCGGCGCGGTCTGGTCGGTG
AGATTCAGCGTCCCGTTTTCCAGCAGGATGGTATCGACATGGCGTGGTTCGGTCAGTTGCCGACTGCTTAGCGCAATGTC
GACACTTTTTGCCACCAGGGTCGCGGGCTGGCCATCACGGCCAAACGTGACGTTCTCCAGCACGATATGAGATGGCGCGG
AAAAACGGTGATCCATCGCCCCGAAGGCCAGATGATAGTCGCTATTCTCGGAAACCCATGCGCTGATATGTTCTGCTCCC
CAGCGAGTTTGCAGAAGAAAATAGAGGCCAGCGATCACCACTAACAGAGCGATGAGAATGTAGAGAAGCAGCTTCCCAAT
AAATTTCATGGTCTTCCATCCCGTGAAATGCACATAAGGGAGTTATGCACGATTTACGCGCAATCCTCAAGGCGGGAATG
GTGAAAGAGGTGAGACTGCGGCGGTAATTATCTTACCGCCGCCAGTGAATTACTGTTTTTCTGGTGGGAAAATCAGATTC
AGCACGATGGCAGTAATACCGCCCGCGGCAATCCCGGAGGAGAGCAGGTTTTTCAGCCATTCAGGAGCAAACTGCAAAAT
CAGCGGCTGCTGAGACACGCCCAGACCGACCGCCAGCGACAGCGCGATAATCAGAATCGCCCGGCGGTTCAGCGGCTCAC
GAGAAACGATACGCACACCGGAGGCGGCGATGGTGCCAAACATTACAAGCGTTGCGCCGCCCAGAACCGGTTCTGGAATG
TGTTGTACAAAACCGCTCACTGCCGGGAACAGACCCAGCACGATCAACATCAGCGCGACGACAAAACCGACATAGCGGCT
GGCAACACCGGTTAACTGGATCACCCCGTTGTTCTGTCCGAAGCAGGAGTTCGGGAAGGTATTAAATACCGCCGAGACAA
ACGAGTTCAGGCCGTTTGCCAGCACGCCGCCTTTCAGACGTTTCATGTACAGCGGACCGGAAACTGGCTGTTCGGAAACG
TCAGAGGTCGCCGTGATATCGCCAATGGTTTCCAGCGAAGTGATCATAAAGACCAGCATCAGCGGCAGCAGCAGACTCCA
TTCAATGCCAAGACCATAATAGAGCGGCGTTGGCACCATAATCAGTTCTTGTGTCATCGGTTCGTTGCTTTCTGGCAACA
TGCCCATAAACCACGCCAGCGCATATCCGGCCGCCATCGCAATCACCAGTGAGGCCACGCGTAAGTAAGGGTTACGTTGA
CGGTTAAGCAGGATAATTAAGGCTAAGACCACGCCTGCCAGCAGCAGATTTTTCGGTGCGCCGAAGGTGTTATCGCTCAT
GGCTGCGTAACCGCCGCCAATGGAGGTCAGCCCAACCTGAATTAGCGACAGGCCGATAATCATCACCACAACGCCAGAAA
CCAGCGGCGTAATAATGCGGCGCGCCAGATGCAGAACGCGGGAGATCACCATCTCGGTACAACTTGCCAGCATCAACGTG
CCGAACAAAGCTGCCATCATGGTAGGAACATCAGCACCACCGGTCTTCAGCGCTGTGCCGCCCATAATCAGCGGAGCAAC
AAAGTTGAAGCTGGTGCCCTGAATAGACAACAACCCGGAGCCAACCGGACCCCAGGCCTTAATTTGAATAATCGATGCCA
CACCGGAGGCAAACAGCGACATACTAATAATGTGTTGCGTGTCTTGTGCCGGTAAACCCAGCGCCTGGCAGATTAATAGC
GCTGGCGTGATCACCGCAACGAACATCGCCAGCAAATGCTGACAGGCGGCAAACAGGGTTTGAGGAAGCGGCGGACGATC
TTCAAGACGGTAAATCAGTTCGCTGTTTTGAGTCTGCGCAACCGGTTGCGCATTTTCTGACTCGAGGGTGGAAACAGACA
TCGAAAACAATCCCGTGGTAGCAAAGCGGGCATTTTAGCTGACCGAAAGAGAAAAGCAAACGTTTGCCACATCCTCATCT
AAATATTTAAATGAGATAAATGTACTTTTTTATATAACTTTTAGTTGTTTTCTGCTTAAAATCCATGCCATTTTTCTAGT
TTCAGCTAAGAATTCGAACCAGGAAAGCATGACTCGATACTCGTCATATTTCGCCTTACTGCAAATGCGCGATGAAGTAT
GACGAGTATGAAAGAGTGATGCGGACACAAAGGAGTAACTATGTTTCATCTCGATACTTTAGCAACGCTTGTTGCCGCAA
CGCTGACGTTGCTGCTCGGGCGCAAGTTGGTCCATTCCGTCTCCTTTTTGAAAAAATACACCATACCGGAACCTGTTGCG
GGTGGTTTATTAGTGGCGCTGGCGCTGCTGATACTGAAAAAAAGCATGGGCTGGGAAGTCAACTTTGATATGTCCCTGCG
CGATCCGTTGATGCTGGCTTTCTTCGCCACCATTGGCCTGAACGCCAACCTTGCCAGTCTGCGAGCTGGTGGGCGTGTGG
TGGGGGTTTTCCTGATTGTGGTTGTTGGCCTGTTGGTGATGCAAAATGCCATTGGCATTGGTATGGCTAGCCTGTTAGGG
CTTGATCCGCTGATGGGGCTGCTGGCCGGTTCTATTACGCTTTCCGGCGGTCACGGTACGGGTGCTGCATGGAGTAAATT
GTTCATTGAACGTTATGGTTTCACCAACGCGACAGAAGTGGCGATGGCCTGTGCAACGTTCGGTTTGGTGCTGGGCGGCT
TGATTGGCGGTCCGGTGGCGCGCTATCTGGTGAAACACTCCACCACACCGAACGGTATTCCGGATGACCAGGAAGTTCCG
ACGGCGTTCGAAAAGCCGGATGTGGGCCGCATGATCACCTCGCTGGTGCTGATTGAAACTATCGCGCTGATTGCTATCTG
CCTGACGGTGGGGAAAATTGTTGCGCAACTTTTGGCTGGTACTGCTTTTGAACTACCGACCTTCGTCTGTGTACTATTTG
TTGGCGTGATTCTGAGCAACGGTCTGTCAATGATGGGCTTTTACCGCGTCTTTGAGCGTGCGGTATCCGTGCTGGGTAAC
GTAAGCCTGTCGTTGTTCCTGGCGATGGCGCTGATGGGGCTGAAACTGTGGGAGCTGGCTTCGCTGGCGTTGCCGATGCT
GGCGATTCTGGTGGTACAGACCATCTTCATGGCGTTGTATGCCATCTTCGTTACCTGGCGCATGATGGGCAAAAACTACG
ATGCGGCAGTGCTGGCTGCGGGTCACTGTGGTTTTGGCCTCGGTGCAACGCCAACAGCAATCGCCAACATGCAGGCGATC
ACTGAACGCTTTGGCCCGTCGCACATGGCGTTCCTGGTCGTGCCGATGGTCGGTGCGTTCTTTATCGATATCGTCAATGC
GCTGGTGATTAAGCTGTATTTGATGTTGCCGATTTTTGCCGGTTAACCGATGAAGCGGCGGTCTTCTCACCGCCGCTTTT
TACGCATTCGAGTAACGTTCCGTTTCCGGCATCCAGCGTTCTATCAGGGCTTTTGCCTGTTGTGGGTAACGTTCGTGAAT
ATGTCGCGCCAGGCGCTGAACTTCCGGGATCATCGCCTGATCGCGCAGTAAATCCGCCACTTTAAATTCAGCATTACCCG
TCTGACGTGTACCTAACAATTCGCCAGGGCCGCGAATTTCCAGATCTTTCTGTGCAATCACAAAACCATCGTTGCTGTCG
CGTAGTACCTGCAGGCGGATTTGCGCGGTTTTGGAGAGCGGCGTTTTGTAGAGCAGCACGCAGTGAGAAGCCACCGCGCC
ACGGCCCACGCGGCCACGTAACTGGTGCAACTGCGCCAGACCCAGACGCTCCGGGTTTTCGATAATCATCAGACTGGCAT
TGGGTACATCAACACCGACTTCAATGACAGTAGTGGCAACCAGCAGGTGTAGCTCGCCTTGTTTAAACGATGTCATCACC
GCCTGTTTCTCTGCGGGTTTCATCCGTCCGTGTACCAGGCCAACATTCAACTCTGGTAGCGCCAGTTTCAACTCTTCCCA
GGTCGCTTCCGCCGCCTGCGCTTCCAGTAATTCCGACTCTTCAATCAACGTACAAACCCAGTACGCCTGACGCCCTTCAG
TCATACAGGCGTGGCGCACGCGGTCAATGATATCGATACGGCGGGTATCAGGAATAGCGACCGTAGTCACTGGCGTGCGG
CCTGGTGGCAGCTCATCTATCACCGAGGTATCGAGATCGGCATACGCAGTCATCGCCAGCGTGCGGGGGATGGGCGTGGC
GGTCATGATCAACTGATGCGGATGGAAGCCCTGCTGCTGACCTTTCTCCCATAACGCCAGACGCTGATGCACGCCAAAAC
GATGCTGTTCGTCGATAATCACCAGCGCCAGGCCGTTAAACTGCACCTGTTCCTGGAAAATGGCGTGCGTACCAACAATC
ATCTGCACCTGACCGCTGGCGATGGCTTCTTGCTGAGCCAGTCGTGCTTTACCTTTCTGTTTTCCGGCGAGCCAGCCTAC
TTCGATACCGAGTGGTGCAAACCAGTTACGGAAGTTATTGGCGTGCTGCTCGGCGAGTAATTCGGTTGGTGCCATCAGGG
CCACCTGTTTGCCGTGGGCAACCGCACGCAACGCGGCGAGGGCGGCGACCAGCGTTTTACCGGAACCTACATCGCCCTGC
ACCAGGCGCATCATCGGCACATCCAGCGCCATATCGCGCTCGATCTCCGCCACTACGCGTGCCTGTGCGCCCGTTGGCTT
GAACGGTAAGGCGGCGAGGAGTTTATTTTTCAGCGCGTCATTGGCGCTCAGCGGCTGAGCATGAAAACGTTGTGCACCGG
CACGTAACGCCAACATGCTGAGGTTGTGCGCCAGTAGTTCTTCCAGAATCAGACGGCGTTGTGCCGGATGCTGCCCGGTT
TCGAGATCGCTAAGCTGTAGCGTCGGCGGCGGGCGGTGCAAAGTGCGCAACGCTTCCGGTAGCGTCATCATTCCTTGTGA
CAGTTCCGGCGGCAGGAGTTCTTCAATGGCGCATGTGTCGAGCAGATCCAGCGCCTGGTCGGTTAATTTACGCAGCGTAG
CCTGCTTTACGCCTTCCGTAGTTGGATAAACCGGTGTGAGCGTTTCCTGTAACTCTGGCGTGCTGAGATCGCCCTGTACG
CGGTATTCCGGGTGGATCATCTCCGCACCATATTTGCCGCGCTTTGCTTCGCCATAGGCCAGCACGCGGCGGCCTGTCGC
CAGGCTATTTTTCATTGCCGCATTGAAGTTGAAAAAGCGCATAGTGAGAATGCCGGAACCGTCGCTGATCTGGCAGGTCA
TCATCCGCCGACTGCCGAAGGAGATATTGCAGTTCAGCACTTCGCCTTCCACCGTGGCATAAACACCCGGCAGTAGTTCA
CCGATGGGGTAGAGATGTGTGCGATCTTCGTAGCGCAGAGGAAGGTGTAAGAGCAAATCCTGTACGGTATGCAGGTTGAT
TTTCGCCAGCTTGTTACTAAGCGCTGCGCCAACGCCCGTTAGGGAACTGAGCGGGACAGCATCTAACAGGCGACCTTTCA
TCGCGCTTACCCTGCGGCCTGCATGGTGGACCACCAGTCAGCATCGGCTTCAATCTCGCCTTGCTGATTAACGTGGGGGT
AGGGCAGACCTTTGCGTTTTGCGACTTTCGCCAGCACCGGATAGCCACCTTCAAACAGCAGGCGTTGTTGCTCGGTTTCC
GGCAACATGCTGTTTTCACGCAGGTACATGCCCGCATTTTGCCGCTGGCGCTGGGCTTCGTAAAGAATGAGGGCTGAGGC
AACGGAAACATTCAGCGACTGCACCATGCCGATCATCGGAATGATGATATCCTGATCCGCCAGGGCCAACGCTTCCTGCG
TGATGCCCGTTTTCTCCTGTCCCATCAAAATACAGGTCGGGCGAGTGTAATCAATTTCGCGGAAATCAACAGCGTTATCA
GAAAGATGGGTTGTCAGAATCTGCATGCCCTGGCCTTTCAGATGAGCGACGGCATCGCCAATGGTGCGGTGCGTTTTCAC
CTGTACCCAGCTGTTACTACCCGCAGCTGCCGAAGCCATGGTGCGCATCCGGCTGCCAGGCCAGACAGCATGAACTTCAT
GTACGCCAACGGCATCTGCGGTACGAATAATCGCAGAAACGTTATGAGGTTTGTGGACCTGCTCCATGCAGACGGTCAGA
TCAGGCTGCCGCCTGGCGAGCATTTCGCAGATGCGTGCATAACGTGTTGGGTTCATAAAACATTAATTTCGGTTTCGGGT
GACTTTAATCACGTCTGGCATCACGCGGATTTTGCGCATGATATTCGCCAGATGCACACGGTCACGAGCGGTCAGACGAA
TAAAGGCGCTGTAGACGCGACCATCTTTCTCTTCCGTATTCAAACTTTGAATATTCGAGGTCGTGGTGTTAATTGCCGCC
GTCAGGTTTGCCAGCGCACCCTGATGATTGAACATCTCCACCTTGATTTCGGTGATGAACTCCTGCGCCGTCTCTTTATC
CCATTCCACAGCCATAAACTTCTCTGGCTCTTTCTGGTAGCCACGGATGTTACGGCAGGATTCATGGTGGATCACCAGAC
CTTTACCGGGGCTGACGTGGGCGATAATCGGGTCGCCAGGAATAGGGCGGCAGCATTTCGCAAAGGTGATCAGCACGCCA
TCGGCACCTTTAATGGGCAGATGTCCGTGACTTTGGGTTGCCGGTGGAATGGAGGCGTCCCCATGTTGCAGATTTTTCGC
GACCACCACGCTCATTGCGTTACCAAGGCCGATTTCAGCCAGCAGATCGTCAAGCGTTGCCAGCTTCATGCGGTCCAGCT
CGCGCTGAATATTTTCCTGCGGGATTTCATTGAGCTTGCGGCTGCCACCCAACGCATGGTTGAGCAGACGACGGCCCAGG
CTTACAGAATCATCACGCTTGAGGTTTTTCAGCAATTGACGAATTTTGGCGCGCGCTTTCGAGCTAACGACAAAGTTCAG
CCACGCGGCATTCGGGCGAGCGCCCGGTGCGGTAATAATTTCAACGGTTTGACCGCTGGTAAGCGGCTGCGACAGCGGGT
AAGGCTGGCGGTCGACGCGTGCGCCCACGCAGGCATGACCGATATCGGTATGCACCGCATAAGCGAAGTCGACGGGCGTT
GCACCGGCAGGCAGTTCGACAATGCGCCCTTCTGGTGTGAAAACGTAAATCTCATCCGGGAAGAGATCGGATTTAACGCT
CTCGATAAATTCAAACGAGCTACCGGCACTCTGTTGCAGCTCCAGCAGGCTTTGCATCCAGCGCTGGGCGCGTATTTGCG
CGGTAGTGCTGGTTTCGCCGTGCTCTTTATAAGCCCAGTGCGCGGCAACACCCATCTCCGCCATCTGATCCATATCTTCG
GTACGGATCTGGACCTCAACCGGCACGCCGTGCGGGCCAATCATCGAGGTGTGCAAAGACTGATAGCCGTTCGCTTTTGG
AATGGCGATATAGTCTTTCACGCGGCCCGGACGCGGCTTGTACAGGCTGTGCATCTGGCCCAGCACGCGATAACAGGTGT
CAGAATCATTGACGATCACGCGGAAAGCGTAGATGTCCATGATTGAGTGAAAACGCTGCTCTTTGAGCACCATTTTGCAG
TAAATCGAATAAAGATGCTTTTCGCGACCACTGACGCGGCACGGTATTCCCGCTTCCTGCAAACGCCCTTCGATTTCAGA
AAGAATCTTCTGGATCATCTCTTTACGGTTGCCGCGCGCGGCTTTCACCACTTCTTTGATTACGCGATAACGGTTGGGAT
ACAGCGCCTCAAAACCCAGCTCTTCGAGTTCGGTTTTAATGTGGTGGATACCTAAACGGTGCGCCAGCGGGCTGTAAATT
TCGAGAGTTTCACGTGCGATGCGGCGACGTTTGTCCGGGCGAAGTGAGCCCAGCGTGCGCATGTTGTGGGTACGGTCGGC
AAGTTTGATGAGGATGACGCGGATATCCTGCACCATCGCCATAATCATCTTGCGAAAGTTTTCGGCCTGCGCCTCTTTCT
TATCGCGGAACTTGAGTTTATCAAGTTTCGACACCCCCTCTACCAGCTCGGCGACGCTTTTACCAAAAAGCTGTTCCATG
TCCTGGTAGGTGGCGGGAGTATCTTCAATCACGTCATGCAGCAGCGCCGCCATAAGCGTTTCATAGTCGAGTTTCATCTC
GGCCAGAATGCAGGCAACCGCCACCGGGTGCGTGATATAGGGTTCACCGCTTGAACGTGTTTGCCCCTCGTGAGCATCAC
GTGCAACGAGATACGCCTGCCGCAGACGCTTGATTTGGTCTTCCGGCAGGTAGGTTTGAATCAGTTGATTCAGGCTTTCA
AACAGATACAAGGGCGACCCGCTTTGTGATTAACGACGACCTTCAGCAATAGCGGTAACGGCTTGTAATTCAGCGGCTTC
CTGCTCTTGCTGTTCCTGGCGTTCGCGAACGTCGAGGATCTGGTTGTTGATCAGACCTTCTTCGATTTCGCGCAGCGCGA
TTACAGTGGTTTTATCGTTTTCTTCCGGTACCAGCGGATCCTTTCCGCCTACCTGCATCTGACGAGCGCGACGCGCGGCG
ACCAGTACCAGGTCAAAACGGTTACCAATTTTCTCTACAGCGTCCTGAACAGTTACGCGTGCCATACTTAAAAAGCTCCA
CAGGTGAAGAAATGACTGGGCATGATACTGAAATCAGGTTCAGTCTGCCAACAATTTGCTGATTAAAGCGTCATGACGCT
GCTTTTGGCGGCTCATGCGCAGACGTTCGGCGCGAATAATGGTCTTCAAATCGGTCAACGCGGTATCGAAGTCATCATTC
ACAATCAGGTAATCATATTCGGCGTAATGGCTCATTTCTGCAACAGCTTGCGCCATACGCTTTGCAATGACCTCTTCGCT
GTCCTGACCGCGACCGCGTAGACGGCGGTCCAGTTCGATTTTAGACGGCGGTAAAATAAAGATACTCCGCGCGTGCGGCA
TCTTCTGGCGAATTTGCTGCGCACCCTGCCAGTCGATATCGAGAAAAACATCGACACCGGTCGCCAGTACTTGCTCAATG
GCCTCACGCGAAGTGCCATAGTAATTACCAAAAACTTCTGCGTGTTCGAGGAACGCATCTCTACTAATCATTTCTTTAAA
TTCATCATGATTAACAAAGAAATAATGTTCACCGTGGACTTCACCAGGACGCGGTTGGCGTGTGGTGTGTGAAACAGAAA
CCTGGGTGTCATACAACGGTTGGGTTTTTAATAAAGCCTGAATTAGGCTGGATTTACCCGCGCCACTGGGGGCAGAAACA
ATATAAAGCGTGCCTTGAGCCATGAGTATCTTTCGTATGTGATTAGCGAAATAAAGCCTACATACGAGCTTATTATACAC
GGCGCGGGCATGTGACGTAGCCCTTGCTCACACTTTTTGCGCAAAGTTGTTGCGTTTTGCGTAGCTACTTCCGCATTTGC
CTGTCATTCACTGCAATAAAGACGATTCTCAGGAAGCGTCCTCGCAGACTCCGTTTTTGCCACTCGGCTTTGCTTTCATC
ACGTTGTATATCTGCCTGACTATCTACAGCGGAGGTGATGATGAAAGTATGGATGGCGATATTAATAAGTATCTTGTGCT
GGCAATCATCGTCGTGGGCAGTCTGTCCGGCCTGGTCGCCAGCCCGAGCACAGGAAGAAATTTCCCGCCTGCAACAGCAA
ATAAAACAGTGGGACGATGACTACTGGAAAGAAGGGAAAAGTGAGGTGGAAGACGGGGTTTACGATCAGTTAAGCGCCCG
TCTCACGCAGTGGCAACGCTGTTTTGGTGAAGAGACGCATCGCGACGCTATGATGCCGCCTTTAAACGGTGCGGTTATAC
ATCCGGTTGCACATACGGGTGTACGCAAAATGGCGGATAAAATCGCATTAAGTCTGTGGATGCGCGAACGTAGCGATCTT
TGGGTGCAGCCAAAAGTTGATGGCGTTGCGGTAACCCTGGTTTATCGGGACGGGAAACTGAACAAAGCAATCAGTCGCGG
CAATGGCCTGAAAGGCGAGGACTGGACGCAGAAAGTTCGCTTAATTTCCGCTGTGCCGCAAACCGTTAGCGGGCCTTTAG
CCAACAGTACGCTTCAGGGGGAAATATTTCTCAAACGCGAGGGGCATATCCAACAACAAATGGGGGGAATAAATGCCCGC
GCAAAAGTTGCTGATCTGATGATGCGCCAGGACGATAGCGACACGCTGAATTCTCTGGGCGTTTTTGTCTGGGCATGGCC
GGATGGACCGCAGTTAATGACCGATCGTTTAAAAGAGCTGGCTACCGCTGGTTTTACTCTAACGCAGACGTATACCCGTG
CGGTGAAAAATGCTGATGAAGTTGCGCGCGTACGCAATGCGTGGTGGAAAACGAAATTACCCTTCGTCACCGATGGCGTG
GTTGTGCGAGCGGCGAAAGAACCCGAATCCCGCCATTGGCTACCAGGCCAGGCAGAATGGCTGGTGGCCTGGAAATATCA
ACCTGTAGCTCAGGTTGCCGAAGTGAAGGCGATTCAGTTTGCGGTGGGTAAGAGCGGTAAAATATCGGTGGTTGCGTCAC
TCGCACCTGTCATGCTTGATGATAAAAAAGTCCAGCGGGTGAATATTGGTTCCGTCAGGCGCTGGCAGGAGTGGAATATT
GCGCCTGGTGATCAGATCCTCGTCAGCCTTGCCGGTCAGGGTATTCCTCGCATTGATGATGTGGTGTGGCGCGGTGCAGA
ACGTACAAAACCGACACCGCCAGAAAACCGCTTTAACTCGTTGACCTGCTACTTTGCTTCTGATGTTTGTCAGGAACAGT
TCATTTCACGCTTAGTCTGGCTGGGGTCAAAACAGGTTCTTGGGCTGGATGGCATTGGTGAGGCCGGCTGGCGCTCGCTG
CATCAGACTCATCGCTTTGAGCATATCTTTTCCTGGCTTTTATTAACGCCAGAGCAATTACAGAACACGCCGGGGATCGC
GAAAAGTAAAAGTGCGCAGCTATGGCATCAGTTTAATCTGGCTCGTCAGCAGCCTTTTACTCGCTGGGTGATGGCAATGG
GAATACCGCTAACCCGGGCGGCGCTTAATGCCAGTGATGAACGGTCCTGGTCGCAACTTTTATTGAGCACGGAGCAGTTC
TGGCAGCAGCTGCCGGGGACTGGATCGGGGCGTGTCAGACAGGTTATTGAATGGAAGGAAAATGCGCAAATCAAGAAGCT
GGGCAGTTGGCTGGCTGCCCAGCAGATCACAGGTTTTGAACCTTAGTGTCCTTCGTGGCTGTAGTAAAAGACCGGTAATC
CCAGCTTAAGGCGTAGCGCCAGTAAGCGGGCAAAAAAGCCGAATACCAGGGTGGAGATAATTACCACATCATGGTTAGAA
ACATAGTGTTGCAGCGCGATGTACAGCACGGCGGAGGCAAATGAGACACCGGCATACAACTCTTTCTGGAATACCAGCGG
GATGCGTTTACAGAACATATCGCGCAAAACGCCGCCAAATACGCCGGTCGTCACAGCTGCGACAACGGCAATGATCGGGC
CGTGTCCCATATCCAGTGCAACCTGTGCGCCAATGATAGAAAAGACCACCAGTCCGAGCGCATCGAGCACCAGAAACACT
TTGCGCAGGTAAGGCATTACAGGAGCAACGATAGTGGTGAGTACTGCGGCGGTAGCGACAATAATTACATATTCCGGGTG
TTTGACCCAGCCGAGCGGATAGTGGCCCAGCAGAATATCGCGCACTGACCCTCCGCCAATTGCCGTGGCGGTCGCAATAA
TAATTACGCCAAATGTATCCATGCGCCGTCGTCCGGCCGCCAGCGCCCCCGTCATGGCTTCGGCAGTAATGCCAACCAAA
TACAAAATGTGTAACAGCATGGTTCTCTCCCTAAAAATCTGTCTGGCAGGGTAGCGATTTGTGCGTATTGTCACGATTGA
GATTTTTTAAGGTGAGAGGAAATTGATAACTTGTAGTTATGTGAAATCGCTATTTTCTGTAGCGTAGATGCATTCTTCTG
ACTTCTTGTCTGAGAGAATGCATAAGAAAAAATAGGTTAAAATTGAGGGGTGGAAAAGAAAGGTGCAATGTTTAGCCATT
GTGTTCACCGCACCTGGACTTTGGCTTACGCATCGGGTATCTCAATCAACAAAAAGAGTTTTTAGTTTCTGCTATTTCTT
CTCTGTAATTTTTACACTGTTTTCCAACTGCTTGATGTTGACCTGCGGGGTCGGCAACTCCTCAGGCATGGTTCCGCCAA
GTTCCTGAATGGTTTGCCTCACCTTGCGACCCACGTCAAAGTGTGTGGTGTTAGCTTGCTGTTTTGAATTCACGCCATCC
CGCTTGAGTTTTTCTTCTGTTTGGGTAGCTCGAAAGAGATTAGCCGCCAGTTCTGTTGAACCCATATGATCCAGGATCTT
CTGACTCTTTTTCAGCCCCTTCCGCTGATGGATGGCTTTCTGATCTAATCCACCATACAGCCCCCGGTAACCATGATTCT
GAAATATGGCGAAATCGATAGCTGTCGCTACCCCAGCTTGCTGCGCTGCCTCAACTAATTGTTTGTTATGTTCTTTCAAC
TCATTTCTCAGAAAAAGACGCTTTTCGTCTTCACGAAGTTGCCTGAAAGCTTCATCGTCAGCCAGCTCCTGCCGTCGGGT
CTGGATAGCAAAATAAGTTTGCCCTGCCGCAATAACCGGTTTCGCAGGGTCGCCGTTTTGTACTACCAGGTAACAGGCAT
AGCGGGAGAGTACGATGTCTTTTAATGCTCTTTTGGCATTTGAGCCAATTTTGATCATATCGAGGATCTCCTCGAAATGG
TCATCAATTGTGTGACCACTATTCAGACAAGCTTCTTTGGCGCGCGTTAATACAGGTATAAAGTGACGATACTCTGAATA
ACCCAGTAGTTTCCCAAGTTGTCTTGCTGACCATTGTTCTGCTCCGTTTGCATTAATCAGCTTTATCTCTTCAAAAGGTT
GATGATGTTCGTTCATTGCCCACTCCATGTGATATCGATTGCAAGGAAAGTAAGTCTACAACTGTGTTTATATACAGTTG
TGAGTATCTCACGTTCTCACTGCGCTGGGCAAAAAAACATCGCAAAATCTGGAGCAGGCACGCAAAACAGAATTGAAGTT
GCGGGGAAGAAAAATGCCGCTCTGTTTGAGTGGGCGGCATTTGTGAAGGCTGAAAAGTAAGAATTGGCGTTACGAGTTGA
ATCTGAATGTTGAGTAGTGTAACCAATCGCTGCTATTGCTGAGTTTTTATTTTCTATTTTTTCTATTGGGTACAGTCTTG
GGTACAAGACAAAGAGGAGTGCTTGAAAATTGCTCATGCAGTTTGAACTGCTCCCCAACAAAATTTTTTCAGCACTCTAC
GTTTTGCTACGCGTTTCTGTTTTCAAGGATTGCAATTCAACTGCAAATATTAAAATATTTCGCGCTATAGGTGTGAAGTG
TTCACCCCGTCCATCTGTTCACTTATTGCGGGTAGTGTACTGATATTAAAGAAAATTATTAGAGTGAACAGCTTTGTTAA
GGTATGCGCACCTGTTCACCCTTTCAGACTAATAAATAGACAAAAACCCCGATTTACGGGGTTCTTGGTGATTTTTTACA
AGTTACTGCAATGTGTCGGGCACAGCTGAGAGTTCGTCTTCTCCCAGCCATTCTTGTGCCCTGTCAGACAAATTGACGTT
ATATCTTTTGCCCTTTTTACTCTTTTTACTGTCCAGAGTAATACCAAAGGCTTTGAGCGTGTCCCGTAAATCTCCGCTGA
ACTTCGGTAGGGTGGGGGTTCTCTGATAACCGTAGGCTTCCAGATAGGCCAGATAAGCATGATAGAGGTAGATGCGTGGC
TCTCGCGCCATGCGCCCATCGCCCATGTACATGCCCTCGGGATTCGGCAAACCTAGCAGGTAAGAGCAAAAGCCATACAT
CGGGTCGTTATCGTTCTTCACCTGCAGCGCTTCCGCTGAATCACGCTGCGCGATAAGTAGCGATTTGGCTTTGCCTGGCT
GTTCGAAGTCAATCAGCAGACCACGGACGATTACCGGCAGTTCGGCTTTAATTTTATCGAGCAGATGGGGATCACGTTCC
GCCTCCGGCACTTCATGGTTAAACGGGAAAATAACCCGGCGCCGCGATATCCCGCCTTGTCGTTCGGTGAAACGCATAGG
TTCGTTGTTTGTTGCGATGACAACGGCGCGAATAACCGTATGGAATGGCTTTTCGTGCTTTGGGTCGATCCTTACCACGT
CGCCGCCCGTTATAGCCTTGATACCCGGCCCGGAACCCGTATATGTTGCTTGGTCGGGTAGGGTGATCAGGCTTTTGCCG
ACAAAAGATGCGCGTTCGCGCGCGGTGTCCATGTCCTCCATTGTGCCGCTGGTGGCGTGTAGTTCGCCCGTCAGCATACG
TGCAATACCCGTGAACACGCTTTTACCACTGCCACCAGCACCGGTAACCTCGATGAACAGTTGCCAGTCGTAGCGGTTTG
CCAGCACCATATACAGAGCGGCTTTGATTCTCTCCATTTTGTCGAAGTCGCCCCCTGCGGAATGATGCAGCCAGCGCCAG
AAGTTTGGGGCATTGTTTTTCAGGGTTTCGCCTTTAACCGGCTGCGTGTATTCAACGCCGTTATGGCTGGTCAGCCAATC
GTCTGGGCAGTGGGGGCGGAATCGCTGCGCCTCGAGATCATAAACGCCGTTGGCAAAGCCAATCAGGTTACGAGGAGTTT
CTCCCATTAAAGGCAGAAGCATTCCCATAGCCTCAATCGCGCTTTTAACCTCGTACGGTGTAAAGGGGACCCCGTTATCT
TTGAAAATCTGCGAAAGCTGGCGGCGCAACTCGGCATCGGCGATGTGCTCCCACACCTGCCCGGTATAGTGATAAACCAT
GTTGCCATCAGCTTTCAGGCATACGTTGCCGTAATATTGCGCCAGCAGTTCACCGCGTGTGCTGGGGGCCATTTTCTCAA
TGTACGCGGCCTTTGCTCGCCATTTGCCCGGATTATTCCACCCCTGCGCCTGAGCATCAGTAAAAATAGCTTTATAGCTG
GTTTTGTCAGGGGCGAGACCATTCCAGCGTTGTGCCGCGACTTCATCAAGTTCTTCATCAGGCCAGCCATCCGCTGCGGT
CAATGACCACTCGACCCACAGTTGCCGCGCGTCGTCCTCAAAATCGGTGCCTTTGAGAGATGCAAGGCGGTAGCCCTGCT
CAATCCACGCCCCATTGTCCCATGCCTTTTGCAGCATGGAGGGAAACCAGAGTGCGCTGCGCAGGTCGGCGATAAGGAAG
TTATCCGGTCCGGCGCTCAGATCGTCAAAATCAGCATCTATTACCGCCGCGGCGTCACGCTGGCGCTGTTTCTTTGCCTT
GCTTTTGGCCGCCTTCGCTGGTGGCTGGGCGGGTTCCGGTAACGCCCCTACGTCGATTACCGCGCCCGCGTAATTCTGGG
CTTTCGCTCCAGTGTGTGGACAGTAGCAATAGCTTTGAGCGCCGTATACATTGCGGTCAAAGACAACATAATCGCTGCCG
TTCTCCCAGCGTGCTTTCTTATCCGCCAGGCTGGCGAATGAGAATCCAGCCTCCTGCATCAACAAAGTTTCTATGGATTC
GCCTGTCGCTCGGCGGTAGTCAGATTCAACCGCTCGGGAAAGCTCGCACACAATACGCAGACGAGGTTCATCCGTCGTAT
AGCTGGCCGTCTGGTACACCAGCATTGAGTATCGCCGGAACACCTGTACAAGTGCTGTGATTGCACCGGGAGTGCTGCCG
TCAATGTCCAGCATACCGAAAGCACACGGTGCCATGTTTTCGGGTTTACGTCGCTGCCCGTCCTGCTGGGTAGTTGCCGA
GAACCAGTACAGTTTCTGCTTTTCTTTGCGCCGTTCTTCATCCGTCATTTCCTGTGTGATGGAAATTTGCACACGATGCG
ATAGAATAGCGTTGCACAGGTCAGAAAAGCTATTTGCAGTAAAACGAGCAGGGGTGCGTTTCTGCCCCTGCTCCATCAGG
TGATCGAATCCACTCATTTCTGACCTCCTTTCAGATCACACATTCTTTTTGCCTGGATGCCGTGGAGCTTGCGTAGCATA
CGGCGGGTATGGCGGTTTGTAGCGTAGGTTCCGTTCGGCTCGTACGGCATGAATGTAGGGCGATTATCTGCGATCTGGAT
ATCGTCGCGCCCTATACCTTTCTGGCGTTCCATTAATTTGATCAGGTTGCTTGATGAGCGATGTTTGCGTGGCATTATTT
GCCTCCCTCTTTGCCGTCAGCCAGTGAGTCCAGATGTCCTGCCATGAATTCGGCAGCGCGCGCCATATCAGCGGTATGTT
TCAGGAATGCGCCCAGCGCTGGCAGGTCAGCTTGATGGTCGGTGTAGTTGGGGTTATCACATGCCCAGAAGATCAGATTG
CCGATGGCGCTTACACCGCGCAGGTAGTTGTTGCGAGCCTCGTCCCCCACAGCGGCCAGCAGACGCAGATCGTCCGGCGC
TGTCTCAGCTGCGCCACCGTTCAGCGGCAGCGTGAAAAGATTCCATGTATTGAGATTAAGCATTGTCCACCTCCGGGGTG
TTACGTTGCGCAGCTGAGGCACGCGCGGCTGTTTCAAGTGCCCAGGCGATCAGCTCATGGGCTAAATCGGTATTCTCCGG
GTCAAGCGCGATAAACTGCGCAGCCTCGAGTGCAACGGCGATCGGACGGAGTGCGTCCTTTGGGTTCAGGTAGGCGTCAT
ACATGGCGCACCTCCACTACTTCCGCCGCGTGGGTCACAATTCTGCTCACTCCATCATCCAGATAGCTGGTATGGGTTAA
CTGCTGCGCCGCTTTCTCTGCGAGCTCACGATTATTGAAACGTTCCGGAATAGCAAAACGACGGATCGTTCCCGAAAAGT
GATAGGTGACCGTGACAATGACATTAAACATGGCTCACCTCCTGAACTGGCAAAACGGCGGACAGTGACAGGATGTAGTG
AGGTGCCAACACCTTACGTGCTTCATGCTCGCTGGTGGCCTCAACAATGATTTTGCAGGGTTTTGCCTGGCGGTCAGCGC
GATCGAGCGCCATAAAACGATACTGATATTTGGGGTGAGTTTGGGTACACTGCGGCTTAGCCATAGCGTTAGTCTCCGTA
ACGTTGTTGGTTAGACGCCCCGTATGTGTTGCGAGCACTACGGGGCGTTGTCTTTTCTGACCTTAACATGTTAAGGTGCG
TACCTATTGATTTGAATCTTAGTTTAATAGGTACATACATGTCAACAGTAATACAGCGTGATAAACAGCCCAAAGGCAGG
GGAAAGGCACCAGCTTTCCAAGTGAGGATCGCCCCAGAATTGAAAGAGCAATTCGAGGCCGCCGCACGAGATGCAGGTAT
GAGTTTAGCTAATTGGATGAAAACCTTGGGGCGCAAAGAACTCCAGCGGCTGGGTATTGAGCCGAAAGCCTGACCCGCCA
ACAATGGAGATCGAACGGCTGTCGTGCAGGGTGTGCTCACGGTCGCGTTAAGCATTCTCACCCCCGGTTTTTTGCTTGTT
CCATTGGCGAATAGCTGCGGCGTCAAAGACGGTCACGCCGTCGGTTAACTGGTGGGGTTTTGGAAAATCAGGACGTTTTG
CATAGCGCCATACGGTGCTGATATGCACTCCAAGATAGTGCGCCACTTGTTTGGCTCGTGCGTTGCCATTGGTAGGAAAG
GTGAAAGTTTGCGATTTCATGCGATTACCTGCTATTGAGTGAGAAGGTAATCGCAAGGCTACGGGGTAGGTGGTTACGGG
TGGGGGAGTTATTGAAAACTCATCGGAGTTATGAAAACTCAGCTACCGAACCCCTCCCTTCTTCAGCCAGTCAGTAAGGG
TATTATCATCGATTTCAGGATCACCGATTGAAGGGATCCGGTTAGATATCTTAATTCTCAGGTCCCTAATGCTCCCCTTA
AAATCATCGTCAGTCAGGTTATACGATCTGAGTAATGCGACGATAAAGCGGCATTGCTTAGCGGTGATACGCTCAGGCGT
TGGCTTTTTTTCATAAGGCTGACCGATCAAAAAGCGCCAAACCTTTTGCAATTCGACACCTGGTATTCGTAAATTTTCCC
GGCCATAAGTATTCCTTAACGCTTCGCAAAGCCCTTCCCCGTTATCATGGTGAGTGTTGTAGTGCGGTTCTGTTGGTATC
CATAGGGACTGCTCATGGAATTCACTATCTGAGCCATATTCTTTCACAGAAAAGTTAGCATTTAAGTTCGGTGGGTAATC
AACATTTAGCCAGAAAAGGTTGAAGCTAATCGGATCCACGGATAACAAAATGCTGTGACCATGCCCGGGAAAATTAACAT
CTTCACAAGCAATGTAGTCCGGCAGAGAAAAACACAACTCGATAACGCCTTGGTTCCATAGTTCCAATAAATCGTTACCG
GTACAATTTGCCCCCTTATCAGTCAGCATCTCCGCTGCCCGGACAAGATCATAGCTTGGTAGAGGGGAATAAAAATCACT
CATTCGCGTTAGCCTTACACACGTACTTGCCTGGATGATTGCTGAGGCAGGCGGTCAGGCGTAGATCGCTTTTCTCCCTG
TCGGAATAGCCTCAAGTTCATTGTGTTAGATAGAGAAATTCCAGTAAGCCAAAAAATACGGGCAGGGGGAATAGCGAAAA
TGCCAATTTTGCCTTATACCTTGCGGCATAGGTCCCTGTCGGCGCTGACGATGGGGCAGCAGTGGGTATAAGTTTCCCCC
GTCGTAATGACCAAATATGGTACCGGAAATGGACGTTTTACTTTGATATTACGTTGATCTGGAATCTATAAGGTTGCTGG
TAGCCAGATGATTTTTCTCCCGGCAAGGACACCTTGTGCCATTGCTTTTTTCTAGGACTTCAAGAGTCTGTGAAAGGTTA
GTGGCCCAAATCCTGTCATGATAGTGCTTTTTATATAATTCTTGCTGACAAAGGAAAAAATAATTGATTGCGTTATGGAC
ACACGAAAAAATACTGATATAAAATCACGGCTATCAGTGACAGTGATAGGAAATGGTCGTGAAAAAATCCAAAGTGGCAG
ATCTCATCGTTCAGAATGTTTCAAAACAACTCTTCATGGCCCTTTCTGACGCGATTTACGCGGCATCAAAGCGTTCTTAC
GATTATGCTCAAAAGAAGAAGCTAGATCACAGATCGACCGCGCTTGGTTATGATCGTCATTTAAACCTGAATGAAACTAT
TTATGAGGTGTTTGAGGCCAACGGTTGTAATCCTGGAAAGCTGCGTGGTAACCGTATTGTAGAAGGCCATAGTGGTATAT
TCACGATTGTTCGTGAAAGCTACAATGATAACCAGTGGAAGAGATTATTCCGTAGCAAACGTAAGCAAGAACTCATTTCT
GAGAACGTGTTTGTGGAAAAAATGGTGCAACCGGATTTATTCTCCGATGGTTCTGATGTGCCAAAAGCTACACTGTTCGT
AGTATGCCGTTTTTCCGGTTCGTTGCAGATTCAGCCTGAAGCTCCGATGTCTATAGAGCTTGTTGTACCAAGTTCTGATG
GGAAGCGCTGGGTTTTTCATGAGCCACTTGAACTTTTTTTAACCCGATATGATGTAGTTCCGTCCCAAGAAGATAATGCA
TTCCCTGGGCTCAAAAGGGGCATTATCAGAAAAGATGGAACCGAGGAAGATAATGTATGAGCCGAGGCGTCGCCGAATTT
CAACCGGGCAGGTTAGCACAGGTACTAGCCGCCCGGCGGCTATCACAAACTCAATTAGCTACTATGGTGGGTGTATCACC
AGCAACCATTAGCAAATGGCGTTCCGGTCAACAGGCTCCAGAGTCTGAGGCTTTAGAACGTCTGGCCACTGTCGTAAATG
TTACACCTGAATGGTTTACGCGCCCTCTGTTGAAGGGGATGTCAAAGCCTCTGTTCAGAAGCAATGCATCAGCTCATGTA
GCTGCACGAGCAATGTTAGAAACTCGAATCCATTGGGCTAATGAGTTAGTTACTAAGCTGACTGAGTTTGTAGATCTGCC
GGAGCTAAAACTACCGCGTCGTAGCTTTACAAACATTGATGAAATTAGTGATGCAGATATTGAAGACGCTGCTAATGAGT
GCCGTGCTCTTTGGAATCTTGGTACAAAGGAAATACCGGATCTTGCTTTAGCCGCAGAGAGTAATGGTATTATCGTTATT
AGAGAAGAAACAGGCGTTGCGCAGATTGAAGGGCTTTCTGCCTGGAGTGAGACTTTAGGTGTTCCTTTTGTTCTCCTCTC
TTCAGATAAAGGTAATGCTTTTCGTAGCAGATTTGACCTTGCTCACGAAATTGGTCATCTGATCCTTCACCGCTATGTTG
GCAACGAACTCGAAGCCGAACGTTATAAGCTGAAGGAAAGTCAGGCTCATAAATTTGCGGGAGCACTGCTGCTTCCTGCT
GAGACATTTGCCGAAGAAATTAGGACCCCGGTAACATTAGATAGCTTGCTTTTAATTAAACAACGCTATGGTATTTCCGT
TGCGGCAAGTATCATGCGTTTACATGTGCTGCATATTATTACGGAAGAAGAGAAACAAAATCTTTATAAGCGTCGTTCAG
CACGTTGGGGAGCGAAATCAGAGCCGGGAGATGATTATCGTGAGCCTGAAAAACCACGTTTGTTGAAACGTACTATTGAA
TTGCTGGCATCGTCTGGAATCATTTCAGTTGAACGGCTTGCTGCATTCGCAGGTTTATCTGCTATTGATGTGGAAATGAT
TGCTGGTTTGCCCGAGGGGTACCTGACTGGCAAGAAGGCTGCTGTTGTGCATCTGGCAAAATTAAAATCTATGTTGGTTG
AGCATCGTGATGTGCAGGCTAACGATCATAAAGGGGCTTTAGTGCAATTTACGCGATCGCCTAAGCGCTCTAATTCTTAA
ATGTTCACATAGCCATGCGTGTTAAATGCATGGCTACTTTACTGTCTTCAAGTTGCTAATTCATTCGGAGGCAGGGACGA
GTACGGGAGATGAGCAAATGTACTGCTCAAGTCAGATACCAAAAATGGCGTTGCCCGGTCAATGACGTTGAGGCCGATTA
GCGAGCTAACATCGCGGCCATTAACAATGTTATCCCGCTCAAGCAAATGCGCTATTTTTCCTACTTCCGGCCAGTATTGA
GTCATGAGGAATTTGGTCTTTTCAACAAGTTTAGAAAGCATTAACTTCCTGTTAATTCGCTTATCCGTGGCACATATTAA
ATCGAGCATGTCATTTACGTTAGCCATGTCATAGCGGTGAGGGAGTGAATACTTTATATTGAAAATTTCGTTATTTTCGT
AAATGGCTTCGCTTACTGGTCCAGCGAGGGCTACAAAAGCGGCCTTTGTTGCATCGCGCTTTATACCTTCCGCGTAGTAG
CGTATGAAAGGGATAACTTTGCCATCGTGCCCAACTACACCAGATTTACTCTCCCGCAAACGCCTGAGATCGTGGCTGTG
GATTATGCCGTGTTTAACAACGCCCAAACACTGGGCTTCATGTACATGTTCGCCAGCAACGTAGCCGGATTCATCCATAA
TGGCGATAACCTGCATATCTAAGCGAATAAGCCATGCGGCTACTGCATGGCCCGCTTCGTGGAATGCTACACATCGTTTA
CCATCGCCTATCCAGTTATAGAACATTTCCTGCTCATATATCTGGTGAATGGCGCCCATTACGCGCCCTCGCTTGCCAGT
GAGGCCAGAGCCTTAGCCATGAGGCCGCGGGCAATCTGGTGAACGGTGGGAGCGACGCCGAGATTGGAGCGCTGGCGTTC
ACGTTCCTGAATGTTGCGTATGGCCTGCATCTGCTCGGCGGACAGCAGGACCGGCTTAACGTTTGGCTTTCTCATTCTGT
TCACTCCAGAACCGTGCATTTGATTCGTTGAGTTGCTGCAGGTTGCGACTCTGGCGATCGAAGTTATTGCGTGCCTTTGC
CGTTTCAAGATCCTGACGGGTCAGCATTGGGCGGTGGGCGCGCTGTGGGTTGCCTGCGGCTAATTTCGGGTCATAGATAG
ACATGCTTCATATCTCTTTAGTGTTTTTTGCCCCAGAAGGTGGCGTTGTCAGCATTGATGCTGCGGATTGCGTCTCCTGT
AGAAATTATTTTCGGAGCGATATTGTTTGCTTTCATGTAGTCGCCAACCTGCTCGAGTATATCGATAGCCTGATCCAGCT
GGATTTCTGACATTGGGGTAGGGTGTACGGCGCTGAACGCCTCAGCAGGGGCGTAGCGCAGCACATCGAGCGCAACGATG
CGCGGGTCGGCGTCGGGCAGTGCTGAATCGTATTTCGGCGCTACGGCACGTACCAGACGCATGAACTCAGCATTCATTGC
TGTCGGTGCCGTGGAAGTAGCAGACGTGCCATTCAAACCGCGGGAAATCATATCACTGTCGCGGGTGTACATGCGGCGCA
GGCGGTCGCCGGTGGCGATGCGCATTTTGCGTTCTTTCTCGAGTGTCGTTGCAAGACTTGCAATGATGGTCGCAACGGTT
CCGCTGCACTGGAACTCCTCTTTACTGCCGTCGGCATACGTCACCACGCCATCTTCGCCAGTCACTGCGATGTTTGTAAT
ATCTTGCATCGGTCAGACCTCAGTATGTTCTATCGGATATTTATGTTTCATTATATGCAATGATGATATTCGTTGTTGCA
ATTATTACAATGTGTTTTTCTTGTGATAACATGCAAATTGAGGTCAGAACTCAATGAGTTGATTCCAAACATGGTTATCG
GTACCCAAAAGCCCGTGCGTCTCCAGCGCGGGCTTTTTCTTTTTGGGGACGGGTGCGAGCTAGTGGCATAAAGCAGATTT
TCTCTACTTTTGAAATCAATAAGTTAGGTTGTTTTGTAGGGTGAGTGCTGGCGTCATCGTACAGATCTGTACGATGATGA
TTTTTGTAGTTTTTTTTAACGCTGGTGGCTGGCGTGTTTTCGGGCAAGGGGAGCAGCCACAGCAGCTTTAGAAGGTGAAC
AGGTGAATACTAAGGTGATTAGTTTTACTGTAAGTATTCACCCTTTTTTATTATTTAAAATCATGAAGTTAATTAAAAAG
GTGAATAGGGTGAATACCTTCAAACAAAACTTTTATATTTTAGATAAAGGAATAACATTGTAGTTTTCCCCTCGTTCAAG
CGAAACCAGAAGCCCCGCCCACAGTTCCAGGGCTGCCCGTCGTTCTTCAAAGTACTGGTGGCGGTTGTAGATACCCTCAA
CGCCTTTAATGCGGTGATTCAGGCAACGTTCTGCGACTACGGGATCGACACCCAACGCCGCTAAATGGGTGCGGGCGGTA
CGCCTGAAATCGTGAATTGTGAAGTTTGGTACTTCTGGCATTTCGCGGCGTACTTTTGCCAGCGCCACTGGGAGTGTGCT
TTCCTGAATGTGGGGAATCATGCGGTGTTGCATCTTCCGCGCGGGGAGAACCCATTTACTCCCACTGCCCGCGATAGTGC
GAAGCTCTCTCAACCAACCAACCGCAGGTGGAGGTAGTGGTATATCAATAGCGTCGCCGTTTTTAACGCGTTCTGCTGGT
AGATGCCACACTGCTTCATCAAGGTCGAATTCATCCCACTGAGCACCGCACAGCTCCATTTTGCGACAACACAGGCAGAG
GATTAGCTTCATGGTCAGCTCGTTCTCGCGGCTGAATCCTTTTGCAGTGCGCATAGCTTGGAAAAAACGTATAAGTTCTT
CACGGGTCAGCCAGCGCATACGGCTACTTTCCTGCCCGCCAGCGTCTGACAGATCAAATGCTCCAGCTGGGTTTAATTCC
AGTGCATGACGCTTGATAGCATAATCGAATATGCGTTTAGTCCAGCGCAGAACGTCATTAGCTACGGTTGGAGCGCCACG
ATCAACAACGCTCTGTAGCATCGCATCAATATGACGGGGTTTTACGTCCTCTATCTTCATGTTGCCAATATGTGGGTTGA
TATCCTTATCGATTCTCCGGCGCAGAAGATCGGGATGTTTCCAGCGTCCCAAAATCTGCCGTTCGAAATACTCGGTTGCT
AGCTCTGACACGCGAAGCGCGTTTTTCTCCCGCTCCATCTTTTCTATAGCAGCCGCTTTTCGCGCTTTCTTTTCCCCGGC
GACATCGAAGCCCAGGGCTACACGTGCGGATAATTCCTTGGCTATTTCCCGTGCTTTGGAAAGGGATATTTCGCTATAAG
ATCCAATAAGCATTACCCGTGATTTCCCAGCGAACTGATATCGAAAACGCCATACAGGCACTTTATCCCCCACTCGATAG
CGAAGGTATAGCCCGTTGCCGTCAGAGCGCCCCTCGAAGCGTTCTCCTGCCTTAATCCATGACTTGATTTGGATATCTGT
CAGCTTTGCCATAGTTTCACCTGAATATTGACTATCATTTTGTACCCAAAATGAATTGGATAAATTATTAAAGGTACAGT
CTTGGGTACAAATGTTTTGCGCGATGCTATGCAATCATATGCGACAGTATGAAAATAAAAAAGCCCGCAAAATGCGGGCT
ATGATGGATTTTTGCAATTTCATGCGACAGCATGCAAAATCATTCAATATTCTGAATCTGCTCGCGCATCTGCTCGATCA
ACACTTTCAGCTCAATGGCGGAGTTAGTCACTTCGGCATTGATAGACTTCGAGGCCAGGGTGTTCGACTCGCGGTTGAAC
TCCTGCATCATAAAGTCCAGACGACGACCAACGGCTTCTTTTTTCTTCAGAATGTTGTAGGTCTCTTTAACATGCGCTTC
GAGGCGGTCCAACTCTTCGGCAACGTCAATTCGTTGTGCCAGCAGAACCAACTCCTGCTCCAGACGGTTGTTTTCCAGTT
GCACCTGGGCGTCTTCCAGCTTAGCCACCAGACGCTCACGCTGCCATTGCAGGATTTCCGGCATGTGGGCGCGGACTTTG
ACCACTTCGGCGGTCACGCCTTCCAGACGCTGCTCGATCAATGCTTTCAGCGCCTGACCTTCGGTTTCGCGCGCGATGAT
AAAGTCGTCCAGCGTACCATCCAGCGCCGCGAGAATTTCAGCGGCAATCGCGTCGAGATCCTGTTCCTGGGCCGCCATCA
CGCCTGGCCAGCGGAGAATATCAACCGGGTTGATTTCCCCTTCGTCACTCTGCATTTTTACCCAGTTCGCGGCAGTTACC
AGCTGTTTAGCCAGTTTTTCGTTGAGGATCAGCTCACCTTGCGCGCTGACATCGGGCTCATAGCGCAGGGTACATTCCAC
TTTACCGCGCGTCAGGCGAGAACGAATACGCTCACGAACGACAGGTTCAAGGCTACGGAACTGCTCCGGCAGACGAAAGT
AAGTTTCCAGATAACGCTGGTTTACCGAGCGCATTTCCCAGGTTGCGCTCCCCCATTCACCCTTGATTTCACGCCGGGCG
TAGGCGGTCATACTGCGGATCATAGACGTTCCTGTTTATAAAAGGAGAGGTGGAAGGATTATAGCCATCGATGCCTTGTC
AGGATAGGAATAACCGCCGGAAGTCCGTATAATGCGCAGCCACATTTGTTTCAAGCCGGAGATTTCAATATGCGTCCAGC
AGGCCGTAGCAATAATCAGGTGCGTCCCGTTACCCTGACTCGTAACTATACAAAACATGCAGAAGGCTCGGTGCTGGTCG
AATTTGGCGATACCAAAGTGTTGTGTACCGCCTCTATTGAAGAAGGCGTGCCGCGCTTCCTGAAAGGTCAGGGCCAGGGC
TGGATCACCGCAGAATACGGTATGCTGCCGCGTTCTACTCATACCCGTAATGCCCGTGAAGCGGCGAAAGGTAAGCAGGG
GGGACGCACAATGGAAATCCAGCGTCTGATCGCCCGTGCTCTTCGCGCGGCAGTAGATTTGAAAGCGCTGGGTGAGTTCA
CCATTACGCTGGACTGCGACGTGCTTCAGGCTGATGGTGGCACGCGTACCGCTTCGATTACCGGTGCTTGTGTTGCACTG
GCCGATGCCCTGAATAAACTGGTTGAAAATGGCAAGCTGAAAACCAACCCGATGAAAGGGATGGTAGCCGCGGTTTCTGT
TGGTATTGTGAACGGCGAAGCGGTTTGCGATCTGGAATACGTTGAAGACTCTGCCGCTGAAACGGACATGAACGTGGTGA
TGACCGAAGACGGGCGCATCATTGAAGTTCAGGGAACGGCAGAAGGCGAGCCGTTTACCCATGAAGAGCTACTCACCTTG
TTGGCGCTGGCCCGAGGGGGAATCGAATCCATTGTAGCGACGCAGAAGGCGGCGCTGGCAAACTGATTTTTAAGGCGACT
GATGAGTCGCCTTTTTTTTGTCTGTAGAAAAGTAAGATGAGGAGCGAAGGCATGAAACCATATCAGCGCCAGTTTATTGA
ATTTGCGCTTAGCAAGCAGGTGTTAAAGTTTGGCGAGTTTACGCTGAAGTCCGGGCGCAAAAGCCCCTATTTCTTCAACG
CCGGGCTGTTTAATACCGGGCGCGATCTGGCACTGTTAGGCCGTTTTTACGCTGAAGCGTTAGTGGATTCCGGCATTGAG
TTCGATCTGCTGTTTGGCCCTGCTTACAAAGGGATCCCAATTGCCACTACTACCGCTGTAGCGCTGGCGGAGCATCATGA
CCTGGACCTGCCGTACTGCTTTAACCGCAAAGAAGCAAAAGATCACGGTGAAGGCGGCAATCTGGTCGGTAGCGCATTAC
AAGGACGCGTAATGCTGGTGGATGATGTGATCACCGCCGGAACGGCGATTCGCGAGTCGATGGAAATTATTCAGGCCAAT
GGCGCGACGCTTGCTGGCGTATTGATTTCGCTCGATCGTCAGGAGCGCGGGCGCGGCGAGATTTCGGCGATTCAGGAAGT
TGAGCGTGATTACAACTGCAAAGTGATCTCTATCATCACCCTGAAAGACCTGATTGCTTACCTTGAAGAGAAGCCGGAAA
TGGCGGAACATCTGGCGGCGGTTAAGGCCTATCGCGAAGAGTTCGGCGTTTAAAAATATGCGCTGCGCAGGTTTTTACTG
TGCGCAGCGTGATGCGGTTTAAGATATCGTGTTAATCTGCTTTCGCCAGCAGTGGCAATAGCGTTTCCGGCCTTTTGTGC
CGGGAGGGTCGGCGAGTCGCCGACTTAACGCCAGTAGTTTGTCCAGATACCCAAAGTCGCTCCATTGTACTTAAGTACGC
TTCGCGTACGTCGCGCTGACGCGCTCAGTACAGTTACGCGCCTTCGGGATAGTTTGAGGGTATTGCCGCTGTTGGTGCCT
CTTTTGGTCGCCGTGATGTGGAGAGTGGAATGGATGCTACCCGGATAACCCTTCTGGCGCTTGATTTGTTCGGCTCGCCG
GGCTGGAGCGCCGATAAAGAAATACAGCGGCTGTATGCGCTCAGTAATCATGCCGCACGCCATTACCGACGGATTATTCT
TTCTAAGCGTCACGGCGGTCAGCGGGTGGTGTTAGCCCCTAATTACTTGCTCAAAACCGTACAGCGCAACATTCTTAAGA
ACGTCCTTTCACAATTCCCTCTTTCCCCTTTTGCTACCGCCTACCGGCCGGGTTGCCCAATCGTCAGCAATGCGCAGCCT
CACTGCCAACAGCCGCAGATCCTGAAACTCGATATCGAAAACTTTTTCGATAGCATTAGCTGGTTACAGGTCTGGCGTGT
GTTTCGCCAGGCCCAGTTGCCACGCAATGTGGTAAGCATGCTGACCTGGCTTTGTTGCTATAACGACGCGTTACCGCAGG
GGGCACCAACTTCGCCTGCCATTTCCAATCTTGTGATGTGCCGTTTTGATGAGCGCATAGGGGAATGGTGTCAGGCTCGG
GGAATTACCTACACCCGCTACTGCGATGACATGACCTTTTCCGGTCACTTCAATGCCCGCCTGGTTAAAAATAAAGTGTG
CGGATTGTTAGCGGAGCTGGGCCTGAACCTCAATCAACGCAAAAGCTGCCTGGTCGCGGCCTGTAAGCGCCAGCAAGTAA
CCGGGATTGTTGTTAATCACAAACCACAACTCGCCCGCGAAGTGCGGAGGGCACTGCGTCAGGAAGTACATTTGTGCCAA
AAATATGGCGTCATTTCGCATCTTAGTCGTCGTGGTGAGCTTGATTCTTCTGGCGATCTTCATGCACAGGCAACGGCGTA
TCTTTATGCTTTGCAGGGAAGAATAAACTGGTTATTGCAAATCAATCCTGAGGATGAGGGTTTTAAACAGGCGAGGGAGG
GTGTAAAGCGAATGCTGGTGGTATGGTAAGAAAAGCGTCAGGCAGACGTTTCTGCCTGAACGTTTGGGAGAATTACTGCA
ACTGTGCGGCAATTAGCGGCCAGCGGGCGTCAAAATCATCCGTCGGGCGGTATTTAAACTCGCTGCGGACAAATCGTGAC
AGCATACCTTCACAAAATGCCAGCAACTGGCTTGCCAGCAGGGTTTCATCGGTGGTGTAACCTTCACCCTCACGCATTCT
CTTTTCACGCAATACCTGACGCAACTGCGCTTCAATACGCTCGAACAGCTGGTTGATGCGCCCTTGCAGACGATCCTGTT
CGAACATTAGCGCATGACCAGTGAGGATGCGAGTCAGGCCAGGATTACGCTCACCAAAACCGAGGAGCAACAACACGATC
AGACGCAGGCGCGCTGTGGTGTCCTTCTCATCTTTCAGAATCAGATTGATGCGAGTAATCAGGCTATCTTCGATAAACTC
AATCAGGCTATCGAACATGCGGGTCTTACTGGGGAAGTGGCGATACAGTGCCGCTTCGGAAACGCCGACAGAGGCGGCCA
GTTTTGCCGTCGTGATACGTTGGCTTCCATCGCTGGATTCCAGCATCAGCGCCAGAGACTGAAGTATTTCCTCGCGACGG
TTCCTTTTCGCAGTTTGTTTTTCTGCCATGTTACAAAATACCCCTGAAAATAAGCACTTGCCAGGCGGCACCCACGCTAT
GACCGCAAACGAAATGTTTGCGGCTATGTTATGACGTTATTCGGATGCGTATGTGTTACTGACGACCAGAGTGACCAAAG
CCGCCTTCACCGCGGTCGGTGGCGTCGAAATCTTCCACCAGATTAAATTCAGCCTGTACTACCGGAACAAAAATCATCTG
GGCGATGCGTTCGCCAGGTTGAATGGTGAAGCTGTCCTGACCACGGTTCCACACGGAAATCATCAACTGGCCCTGATAGT
CAGAATCGATCAATCCTACCAGGTTACCAAGCACGATACCGTGCTTATGTCCCAATCCGGAGCGCGGCAGCATCATTGCC
GCCAGTGAAGGATCGGCAATATGAATCGCCAGCCCGGTCGGAACTAGCGTAGTGTCACCCGGAGCCAGTTCTACGGCGTC
GTCGAGACAGGCACGCAGGTCAAGTCCGGCAGAGCCAGAGGTGGCATAAGTCGGGAGCGGAAATTCCTTCCCAACGCGCG
GGTCCAGAATCTTAACGTCGATTTTTTTCATCATAACGGGTCACGATCTCGTCGAGTAATAATTGGCCAAGGAGCTCTTT
GCGCTCAAGCGGTAAGACTTTATCTCCGTCCTGCCAGAAAAGGTGTAATGCGTTGTTGTCGCTGTTAAATCCTTGAGTTG
GCTGGGAAACATCGTTCGCGCAGATCAGATCAAGGTTTTTACGGATACGTTTTTGCCGGGCGTATTCTTCCACATTATTT
GTTTCGGCGGCAAATCCAACGACGTAGGGTCGATGGTCTTTTAGTGCGGCAACGCCTGCGACGATATCGGGGTTTTTAAC
CATTTTTATTGTTAATTCATCACCCTGCGTGGCCTGCTTTTTGATTTTTTCTGGGGCCACGGTAGCTGCGCGATAATCCG
CCACGGCGGCGCAACCGATAAAAATATTTTGCTGCTGTACAGAAGCATTCACGGCGGCTTCCATTTCCAGCGCGGTCATC
ACATCAACACGGTTAACAAACGGTGGCGTCGGTAGTGAAACCGGACCTGATACCAGCGTGACGTTCGCGCCACGACGGGC
TGCGGCGGCGGCGATAGCAAAACCCATCTTGCCGGAGCTGTGATTAGAGATATAACGCACGGGATCGAGCGGTTCACGCG
TCGGACCGGCGGTAATCATAATGTTCAGATGTTTCAGGTCGTTGACGGGCGAAAAATGCGCTACCGCCATATCCACAATG
GTTAACGGATCGAGCATTCGCCCTGGGCCGATATCACCACAAGCCTGACTGCCGCTGTCTGGCCCCCAGATGAGCAAACC
ACGCGAGGCAAGCACCTCTAAATTATGCTGCGTGGCAGCGGCACGGTACATCTGCTGGTTCATGGCGGGGAGCACGGCTA
CAGGCGCAGGTGTAGCCAGACAAATCGTCGATACCAGGTCATTCGCCATTCCGGCTGCAACACGGGCAATTAAATCTGCC
GTGGCAGGGGCGAGAATCACTAAATCAGCCCATTTTCCCAGCTCAATATGGCCCATAGCGGCTTCGGCTGCCGGGTCCAG
CAGACTGTCGGAAACGGGATAACCAGAAACCGCCTGCAAGCTAAGTGGGGTGATAAAGGCTTTTGCCGCTTCGGTCATGG
CTACGCGGACATCGGCCCCGCGATCGCGCAAACGACGCACCAGTTCAGGGGTTTTATAGGCAGCAATACCGCCGCTAACG
CCGAGAACGATTTTTTTACCGGCCAGGCTCATGATGATTTTTCCTGTTGGGTGACACCAGAAGTTGGCGATTTTATCACA
ATACTTTTGTTGTCGTGCCTTCACCTGAGATTCACTTTGCGAGGCGCTTTCCAGGATTGAAAACTGGCCGTCGATTTAAA
GGAACGGCTATGACAGGATGCGAGCACCACAAAGGAGGTGAAGGTGAAAAACAATGCACAGCTGTTGATGCCGCGCGAAA
AAATGCTGAAGTTTGGTATTAGCGCCTTAACGGATGTCGAGCTGCTGGCGCTATTTCTGCGTACCGGAACGCGCGGTAAA
GATGTATTAACCCTGGCAAAAGAGATGCTGGAGAATTTCGGCTCTCTTTATGGCTTGTTAACCTCTGAATATGAGCAATT
TAGTGGCGTTCATGGAATTGGCGTGGCGAAATTCGCCCAGTTAAAGGGGATTGCCGAACTGGCGCGGCGTTACTACAACG
TACGGATGCGTGAAGAAAGCCCTTTACTCAGCCCGGAGATGACGAGGGAATTTTTACAAAGCCAGCTCACGGGCGAGGAG
CGGGAGATCTTTATGGTGATCTTTCTCGACTCCCAACACAGAGTTATAACGCATAGCCGTCTTTTTTCCGGCACGCTAAA
CCATGTTGAAGTCCATCCTCGGGAAATTATCCGCGAAGCGATAAAAATAAACGCCTCGGCGCTGATCCTTGCGCATAATC
ACCCTTCGGGTTGTGCTGAACCCAGTAAAGCGGATAAACTCATTACTGAACGGATAATAAAGAGTTGTCAGTTCATGGAT
TTACGCGTGCTCGACCATATCGTGATTGGGCGTGGAGAGTATGTTTCTTTTGCCGAACGCGGCTGGATTTAACCCGCTAT
GCGCGATCCTTCGGGATCTTTGTCTGTTCGGGACTTGAGCACATCGCTGAGTCAGCGTATACTACGCCACCTTTGAGAAT
CTCGGGTTTGGCATTTGGGCCTGGCAATCGAGAGTTCACATAGAACTGCGATGACCGGGCTGTAAAGCCTGACGAGGCGC
CAATACCCCATACGAAGCTCGAGCTAATTTGATTTTTGGAGAATAGACATGTCCCGAGTCTGCCAAGTTACTGGCAAGCG
TCCGGTGACCGGTAACAACCGTTCCCACGCACTGAACGCGACTAAACGCCGTTTCCTGCCGAATCTGCACTCTCACCGTT
TCTGGGTTGAGAGCGAGAAGCGTTTTGTCACCCTGCGCGTATCTGCTAAAGGTATGCGTGTAATCGATAAAAAAGGCATC
GATACAGTTCTGGCTGAACTGCGTGCCCGTGGCGAAAAGTACTAAGTACTTAGAGGAAATAAATCATGGCTAAAGGTATT
CGTGAGAAAATCAAGCTGGTTTCTTCTGCTGGTACTGGTCACTTCTATACCACTACGAAGAACAAACGTACTAAGCCGGA
AAAACTGGAACTGAAAAAATTCGATCCAGTTGTTCGCCAGCACGTGATCTACAAAGAAGCGAAAATCAAATAATTCTCGC
TTTGATGTAACAAAAAACCTCGCCCCGGCGGGGTTTTTTGTTATCTGCTTGCCCCCATATTGACTGCATCTGTTCATTCC
TGGAGATGCTATGCCTGAATTACCCGAAGTTGAAACCAGCCGTCGCGGCATAGAACCGCATCTCGTTGGTGCAACCATTC
TTCATGCGGTGGTGCGCAACGGACGCTTGCGCTGGCCGGTTTCAGAAGAGATCTACCGTTTAAGCGACCAACCAGTGCTT
AGCGTGCAGCGCCGGGCTAAATATCTGCTGCTGGAGCTGCCTGAGGGCTGGATTATCATTCATTTGGGGATGTCTGGCAG
CCTGCGCATCCTTCCAGAAGAACTTCCCCCTGAAAAGCATGACCATGTGGATTTGGTGATGAGCAACGGCAAAGTGCTGC
GCTACACCGATCCGCGCCGCTTTGGTGCCTGGCTATGGACCAAAGAGCTGGAAGGGCACAACGTGCTGGCCCATCTTGGA
CCGGAGCCGCTTAGTGACGATTTCAACGGTGAGTACCTGCATCAGAAGTGCGCGAAGAAAAAAACGGCGATTAAACCGTG
GCTGATGGATAACAAGCTGGTGGTAGGCGTAGGGAATATCTATGCCAGCGAATCGCTGTTTGCGGCGGGGATCCATCCGG
ATCGGCTGGCGTCATCACTGTCGCTGGCGGAGTGTGAATTGTTAGCTCGGGTGATTAAAGCGGTGTTGCTGCGTTCGATT
GAGCAGGGCGGTACAACGCTGAAAGATTTTCTGCAAAGTGATGGTAAACCGGGCTATTTCGCTCAGGAATTGCAGGTTTA
CGGGCGAAAAGGTGAGCCGTGTCGGGTGTGCGGTACGCCGATTGTGGCGACTAAACATGCGCAGCGGGCAACGTTTTATT
GTCGGCAGTGCCAGAAGTAATTGATGCGCGCCGGATGGCATACCATCCGGCATAAACGCTACGCTAACTTCGCCATCAGC
GCCTGATGGACATTCTCCGGCAGGAAATGGGTGACATCGCCCTGATGGCGCGCCACCTCTTTCACCAACGATGAAGAGAT
AAACGACCACTCTTTCGACGGCATCAGAAACACACTTTCCAGTTCTGGCATTAAGTGGCGATTCATATGCGCCAGCTGCA
TTTCATATTCAAAATCCGCCACCGCACGCAGGCCACGAATCAGCACCGTAGCGTGTTGATTACGGGCGAAGTTCGCCATC
AAATCACTAAACCCGACCACTTCCACGCTCCCCAGATGCGCGGTTGCCTGCTGTGCCAGCTCCACACGCTCTTCCAGGGT
AAACATCGGTTTTTTACTGGGACTAGCGGCAATCGCCAGAATAACGTGATCGAACATTTGCGTGGCGCGCGTCACGATAT
CGATATGACCATTGGTAATAGGATCGAAAGTACCCGGATAAATCGCCCGTTTTTGCATAACAACCTCAATGCGTTTTCGG
TGGCAGGTAAGGTTCCAGCAGTTGAAGCAGACGCTGTAGTGCGCCCTGGTTTTGATACAGCACTTCAACGGCATGACGGC
CATAGAAACTACGGTAATCGGCGTCGGTGAGTAAAGAGGAAACCTCTTTTGCAAGCGTAGTGGCATCGGTAACGGTAATC
AGCCCGCTTGCCTGCTCCAGCCGCGCGCAAATGTCTTTAAAGTTAAACGTATGCGGCCCCATCAATACCGGAATAGCGTG
TGCGGCCGCTTCCAGCGGATTATGCCCACCACGTTCAACCAGTGAACCGCCAACAAAGGCGAGATCGGCAATGCCGTACA
GTAACATCAACTCGCCCATCGTATCGCCAACCACAACCTGCGTGCTGGTGGAGGGGACTTCCCCTGAAGATCGTGTGATA
TAGCTTAGTCCAGCCTGGCGGACAAGGTTAATCGCATCCGGGAAGCGTTCTGGATGACGGGGTACCAGGATGAGCAATAA
ATTCGGGAATTGCTGTAACAATGCCTGATGTGCGGCGATCACCACACTCTCTTCGCCTTCGTGAGTGCTGGTGGCAATCC
ATACCGGGCGGTGTGGTGCCCACTGGCGGCGCAGCGTCACTGCTTTAGCAGCCAACTGCGGCGTTACAGAAATATCGAAT
TTCAGGCTACCGGTAACGGTCACCTGATTATTTTTTGCGCCCAGCGCCACAAAACGTGCACCATCTTCTTCATTTTGGGC
GGCAATCAGCGTAATACGACGCAGCAAGCGGCGGACGAATTTACCCAGTTTGGCATAACCTGCGGCCGAGCGGGCAGAGA
GTCGCGCGTTAGCGATCACCAGCGGAATTTTACGTTTATGTAGCGCCGCAATCAGGTTAGGCCATAGTTCAGTTTCCATA
ATCAACACCAGTTTAGGGTCGACTTTATTCAGGAAACGGTTGAGTGCATCGGGCAGGTCATACGGCAGATAAACGTGCTG
AACATCCTTCCCGAAAGCCGATTGTACGCGCTCCGAACCGGTTGGAGTCATGGTTGTTACGGTAATCGGTAAATCAGGAT
AACGATGACGCAGTGCGCGCACCAACGGGATCGCCGCCAGAGTTTCACCGACGGAGACGGAGTGCAGCATAATGCCGCCT
GGTTTTAGCGGATGGCGGTAAAAACCGTAACGTTCACCCCAGCGTTTTCGATAGGCCGGAGCCTTACGTCCGCGCACCCA
GAGCCGTATCCAGATCAGCGGCTGAATAAGGTAGAGAAGGGCGGTGTAAAGCAATTCGAGCATAGTAAATAGCTGACTTA
TGGATGTGCTGGGGATTCTATGTATTTAGCTGTGGCTTTACCATTACTTTTCCCGTTTTTGACTTAAATAGCAATTTACC
CGCCAATTCTTGCTGAACATCTATACTTTTTTTGTATTTTTATGCGATTCATTGATTTCTGCAGTACGTGCAGGAAGGAA
TCGCAGAGCAACAGTAAAAAGAATATGGTTGCTAATGATTTTATTTGATTGATTTCTTTATTGAAAATCAACAATGTGCT
TAAAAATCATTCGGGTCGGATTGCCGCGAAAGAAGTGATACACTAGCGCGTCAATATCAGTGCGGTATCAGTATTCAGGT
AGCTGTTGAGCCTGGGGCGGTAGCGTGCTTTTTCTGCTTCACCTTAATCGGATAATCTCAACAAAAAGAGTTACTTGTGG
ATAAGCCATTTCGAAGAATTTTGCTCATTAAGATGCGTTTTCATGGGGATATGTTATTAACTACTCCCGTCATTAGTTCG
CTGAAAAAAAATTACCCTGACGCAAAAATCGATGTGCTGCTTTATCAGGACACCATCCCGATCCTGTCTGAAAATCCAGA
GATTAACGCGCTCTACGGCATAAAAAATAAAAAAGCAAAAGCCTCAGAAAAAATTGCCAACTTTTTTCATCTCATCAAGG
TATTACGTGCCAATAAGTATGACCTTATCGTTAATCTTACCGATCAATGGATGGTTGCTATACTGGTTCGCTTATTAAAT
GCCCGTGTGAAAATTTCCCAGGATTATCATCATCGGCAGTCTGCTTTTTGGCGTAATAGTTTCACTCATTTGGTGCCGTT
GCAGGGTGGAAATGTGGTGGAAAGTAACTTATCCGTGCTGACGCCATTGGGACTTGAATCGTTGGTGAAGCAGACAACCA
TGAGTTACCCGCCTGCAAGCTGGAAACGTATGCGTCGCGAACTTGATCACGCTGGTGTTGGACAAAATTATGTGGTTATC
CAACCTACGGCGCGGCAAATCTTCAAATGCTGGGACAACGCCAAGTTTTCCGCTGTGATTGATGCCTTACATGCTCGTGG
TTATGAAGTCGTTCTGACGTCCGGCCCAGATAAAGACGATCTGGCCTGCGTCAATGAAATTGCGCAGGGATGCCAGACGC
CACCAGTAACGGCGCTGGCCGGAAAGGTGACCTTCCCGGAACTTGGTGCGTTAATCGATCATGCGCAGCTGTTTATTGGC
GTTGATTCCGCACCGGCGCATATTGCCGCTGCAGTTAATACGCCGCTGATATCGCTGTTTGGTGCGACGGACCATATTTT
CTGGCGTCCCTGGTCAAATAACATGATTCAATTCTGGGCGGGAGATTACCGGGAAATGCCAACGCGCGATCAGCGTGACC
GAAATGAGATGTATCTTTCGGTTATTCCGGCGGCAGATGTCATTGCAGCTGTCGATAAATTACTTCCCTCTTCCACGACA
GGTACGTCGTTATGATCGTTGCTTTTTGTTTATATAAATATTTTCCCTTTGGCGGTTTGCAGCGCGATTTTATGCGTATT
GCTCAGACAGTCGCCGCCCGAGGTCATCATGTTCGGGTTTATACCCAGTCGTGGGAAGGCGAATGCCCTGATGTATTTGA
ACTGATCAAAGTGCCGGTTAAATCGCATACCAATCACGGGCGCAATGCGGAATATTTTGCCTGGGTGCAAAAACATTTAC
GTGAACACCCCGTCGATAGAGTCGTTGGATTTAATAAAATGCCGGGGCTGGACGTTTATTATGCCGCTGATGTTTGTTAT
GCCGAGAAAGTAGCGCAGGAGAAAGGCTTTTTCTATCGCCTGACGTCACGTTATCGCCATTATGCCGCCTTTGAGCGGGC
AACCTTCGAACAGGGCAAGCCGGCACAGCTGCTGATGCTGACAGATAAGCAAATCGCCGATTTCCAGAAACATTATCAGA
CTGAAGCGGAGCGTTTTCATATTCTGCCTCCGGGGATTTATCCTGATCGTAAATATAGCCAGCAACCAGCGAATAGCCGT
GAAATCTTCCGTAAGAAGAATGGAATAACCGAACAACAATATTTATTGTTGCAGGTCGGTTCAGACTTCACGCGTAAAGG
TGTCGATCGTTCCATTGAAGCACTTGCTTCGTTACCGGATTCGCTGCGCCACAACACATTACTATATGTTGTTGGGCAGG
ATAAACCGCGAAAATTTGAGGCGCTGGCAGAAAAACGCGGCGTGCGCAGTAATGTTCACTTCTTCTCGGGGCGCAACGAT
GTCTCGGAATTAATGGCGGCGGCGGATTTATTACTGCATCCTGCCTACCAGGAAGCGGCGGGAATTGTGCTGCTGGAAGC
GATTACTGCAGGATTACCGGTACTAACAACAGCCGTTTGTGGCTATGCGCATTATATTGTCGACGCCAATTGCGGCGAGG
CTATTGCTGAGCCATTCCGCCAGGAAACATTGAATGAGATTTTACGCAAAGCGTTAACGCAATTTTCATTGCGCCAGGCC
TGGGCGGAAAATGCGCGACATTATGCTGATACACAAGATTTATACAGTCTGCCAGAAAAAGCGGCGGATATCATAACGGG
TGGTCTGGATGGTTGAACTTAAAGAGCCGTTTGCCACGTTATGGCGCGGAAAAGATCCTTTTGAGGAAGTTAAAACTTTG
CAGGGTGAGGTATTTCGTGAACTGGAAACTCGCCGTACTCTGCGCTTTGAAATGGCGGGCAAAAGCTATTTTCTCAAATG
GCATCGCGGCACGACCCTGAAAGAGATAATCAAAAATTTACTCTCATTGCGGATGCCAGTATTAGGCGCAGACCGCGAAT
GGAATGCGATTCATCGACTGCGGGATGTCGGCGTTGATACTATGTATGGGGTGGCATTTGGCGAAAAAGGTATTAATCCG
CTGACCAGAACCTCGTTTATTATTACCGAAGATCTGACACCAACCATTAGTCTGGAGGATTACTGTGCTGACTGGGCAAC
CAACCCACCAGATGTTCGCGTAAAGCGTATGCTTATTAAGCGTGTAGCGACGATGGTGCGCGATATGCATGCTGCGGGCA
TTAACCACCGTGACTGTTATATCTGTCATTTCCTGCTGCATTTGCCTTTTTCCGGTAAGGAAGAGGAGTTAAAAATTTCA
GTAATTGACCTGCACCGGGCGCAGATACGTGCAAAAGTACCGCGTCGTTGGCGGGATAAAGATTTGATTGGTTTGTATTT
TTCATCAATGAATATTGGGCTGACGCAGAGAGATATCTGGCGATTTATGAAGGTTTATTTTGGGATGCCTTTACGTGAGA
TATTATCTTTTGAACGGAATTTATTGAACATGGCAAGTGTTAAGGCCGAGCATATTAAAGAGCGAACACAACGCAAAGGA
TTATAAAAATATTAATCAGTATGTACTGGAACTAACTTCATTATGACTATTTATTTTATAAACTGGGTTGCAGATTATGA
ATTAAAAATGATCCAGTACTTGAAAAAAAAGCACAAGATAAAAAATATAACAACACCAAAAAAATACAACTGGGTTAATA
AGAAAATTTCGAAATTAGGGATGGATAATGCATGGTTGGGACGATTATTTATCAAACATCACCTAAATGCTGTAAAAAAG
GATGATATCATTATATTTAATGACAGTGTCATTAATAAAAATATTAACAAGCAAATATTAAAAAATATTAATTGTCATAA
AGTATTACTTCTAAGAAATACTGTCAGTGAAAATTTTATTTTTGATAACACTAATTATTTTGATATTATCTATGATTTTG
AGCATAGATTTATAGGGAATGAAAAGATCAAGGCAATAGAACAATTTTTTCCTATAGGAATGGATGAAATTAGAAATTAT
AGTTTATCTGACAAAAATAACAGTCAGCCAATATGTTTTTTTCTTGGTCGTGATAAAGGACGTCTTCAAATAATTAATGA
ATTAGCCGATAGATTAACAACACTAGGATGTAAGTTAGATTTTAATGTTGTCAAAGATAAAACATCATCTCCGACTTCAA
AGTATTTGATTGAAAAACAAATACCGTATGAAGAGAATATTAGAAGAACATTAAATGCTAATATAATTGTTGATATAACT
AAAGAAAACCAATCTGGCTGGACTCTTCGTATACTTGAGGCACTATTTTTCAATAAAAAATTAATTACTAATAATATAAA
TGTACTTGGTTCGGAAATCTATAGTGAGTCTCGCTTTTTTATAATAGGTCATGATGATTGGGATAAGTTAGAGTATTTTA
TTAATTCATCTGTTAAACCAATGGATTATGATAGTTTATATAAATTCAGCCCTGATAAAATGATGTCAACAATTGTTTAT
GATTTTATAGAAAAATAAAACCGTTAAAACAGTGAGTTTTACTCAATTAATGAGAGTTTCAATGAAAATAGCATTTATCG
GCGAAGCTGTTTCTGGATTTGGCGGCATGGAAACGGTCATTCGTGATGTTATTACTACCTTCAGGCAACAACATATCTAT
AGTGAAATGTTTTTCTTTTGTCGTAATGATAAAATGGATAAGGGATGGCTGGAAGGTATTAAGTACTCGTGTTCATTTTC
CAATATTCGCTTAGGTTTTTTGCGTCGGGCGAAACATATTCATGCTTTAAGCAAATGGCTTCAAGATTATCAGCCAGATG
TTGTTATTTGTATTGACGTTATCTCGTGTTTGTATGCGGCCAAAGCACGTAAAAAATCAGGAATTGATGTGCCAGTATTT
TCATGGCCGCATTTTTCTTTAGATCACAAAAAACATGCTGAATATATCACCTGTGCAGACTATCATTTAGCCATCAGCTC
TGGCATTAAACAGCAAATGATTAATCGGGGTGTACCAGAATCGACGATAAATGTTATTTTTAATCCAGTCGAAGCTAAAG
ACACAGTCATTCCTGGGCCTGAGGAAGGTGAAACGGCAACGTTCATTTATGTTGGGCGTATGAAATTCGAGGGCCAGAAG
AGGGTTAAAGACCTGCTTGATGGTTTATCACAAGCGCAAGGTGACTGGAAACTCCATGTACTGGGTGATGGTTCTGATTT
TGAAAAATGCCAGGCATATGGTAGAGAATTGAAGATTGATAATCGAATTGTCTGGCATGGTTGGCAAAAACATCCATGGG
AGGTAGTGCGTCAGGATATTAAGAAAGTCAGTGCATTGTTATTAACCTCATCTTTTGAAGGTTTTCCAATGACCTTACTT
GAATCAATGTCATGGGGGATTCCGTGTATCAGTGCCGATTGTGTCTCCGGTCCTGGTGACATTATTCAACCTGATGTCAA
TGGCCATTTGTATCAACCGGGAGATATTGCTGGTTTTGTTACTCTTCTAAATAAATATATAGCAGGTGAAATTCATATCG
AACATGAAAAAATTCCTGCGTCGATCGATAAGTTTTATCAATCTAAGTATTATGATAGATTACATAATATAATTATTTCT
GCTATTTCCCGGAGGAAATAATGCAGCAGGTATTTTTCCAGGAAACTGAGTATCTAAATTCAGTTATTGATTATAATCAT
AAAGTAGAAACAGAAAATCTTTGTCTGGACATCGCTTATGGAACTGACAAAAACTTTCTATTTGGTTGCGGAATTTCGAT
TGCTTCAATATTAAAGTATAATGAAGGAAGTCGGTTGTGTTTCCACATTTTTACTGATTATTTTTGTGATAATGATCGTA
AGTATTTTGATGCCCTGGCATTACAGTATAAAACCAGAATTAAAATATATCTGATTAATGGTGATCGACTGCGCTCATTG
CCTAGCACAAAGAACTGGACCCATGCAATATATTTTCGTTTTGTTATTGCTGATTACTTTATTAGTAAGGTGGCTAAAGT
CCTTTATCTGGATGCAGATATCATTTGTCAGGGGACTATTGAGCCACTAATTAAATTCTCATTTCCTGACGATAAAGTCG
CAATGGTTGTTACAGAAGGACAAGCTGACTGGTGGGAAAAACGCGCCCATTCGTTAGGTGTTGCGGGAATTGCTAAAGGT
TACTTTAACTCCGGTTTTTTATTGATTAATACTGCCAAATGGGCGGCTCAGCAGGTTTCTGCACGAGCCATTGCAATGCT
AAATGAGCCAGGAATAATCAAAAAAATAACACATCCTGATCAGGATGTATTAAATATGTTGCTGGCAGATAAACTTATTT
TCGCTGATATTAAATATAACACCCAGTTTAGCTTAAATTATCAACTAAAAGAAAGCTTTATAAACCCAGTAACCAACAAT
ACTATTTTTATCCATTATATCGGGCCAACCAAGCCCTGGCATGATTGGGCCTGGGATTATCCTGTATCACAAGCCTTTAT
GGAGGCAAAAAATGCTTCGCCATGGAAGAATACGGCGTTGCTGAAACCGAACAATAGCAATCAATTAAGATATAGCGCAA
AACATATGCTTAAAAAACATAGATATCTAAAAGGATTTAGCAACTATCTTTTTTATTTTATTGAAAAGATAAAGCATTAA
AACTGAGAAACAATAAAGTAATGATATAAGGGTAGCATTGTGGACTCATTTTCTGCCATAGAGATAGATAAAGTTAAAGC
CTGGGATTTTCGGCTGGGTAATATAAATACTTCTGAATGTTTAAATGTTGCCTATGGTGTCGATGCTAATTATCTTGATG
GTGTAGGTGTTTCCATTACATCAATTGTCCTAAATAATCGACATATTAATCTTGATTTTTATATTATTGCTGATGTTTAT
AATGATGCTTTTTTTCAAAAAGTTGCAAAGCTTGCAGAGCAATACCAATTAAGAATCACATTATATAGAATTAACACTGA
TAAGCTCCAGTGCTTGCCTTGTACACAGGTCTGGTCAAGAGCAATGTACTTCCGTTTATTTGCATTTCAATTATTGGGTT
TAACACTTGATCGTTTGCTTTATCTTGATGCAGATGTTGTTTGTAAAGGCGATATTAGCCAACTATTGCATCTGGATTTA
AACGGAGCGGTTGCAGCTGTTGTTAAAGATGTTGACCCAATGCAGGAAAAGGCGGCATCCAGGTTGTCTGATCCTGAATT
ACTTGGGCAGTACTTTAATTCTGGTGTCGTTTATTTAGATTTAAAAAAATGGGCTAACGCAAAACTAACAGAAAAAGCGT
TGTCTATTCTTATGAGTAAAGATAATGTGTATAAATACCCTGATCAGGATGTTATGAATGTCTTACTGAAAGGGATGACA
ATATTTTTGCCTCGTGGATATAATACAATTTATACAATTAAAAGTGAATTAAAAGACAAAACACATCAAAACTATAAAAA
GCTGATTACAGAAAGTACTCTGCTTATTCACTATACAGGTGCAACTAAACCGTGGCACAAATGGGCAATTTATCCATCGG
TAAAATACTATAAAATAGCTTTAGAAAATTCACCATGGAAAGATGACTCTCCACGAGATGCAAAATCAATTATTGAATTT
AAAAAAAGATATAAACATCTTTTAGTACAGCATAAATATATCTCAGGAATTATAGCAGGAGTCTGTTATCTTTGCCGAAA
ATATTACCCTAAATAACATTTAACTGGTTTATTATGATTCAGAAGAGCAAGATCAAAGACTTGGTTGTTTTTACCGATGA
AAACAATTCAAACTATCTCAATGTATTAAATGACTTCTTGTCTTATAATATAAATATCATCAAGGTTTTTCGTTCTATTG
ATGATACAAAAGTTATGCTTATTGATACCGATTACGGTAAATTGATTCTTAAGGTTTTTTCTCCGAAAGTTAAGCGTAAC
GAGCGTTTCTTTAAGTCTCTGTTAAAAGGTGATTATTACGAACGCCTTTTTGAGCAAACCCAAAAAGTAAGAAATGAAGG
GTTAAATACACTCAATGATTTTTATTTATTAGCTGAACGGAAAACCTTACGATTTGTCCATACTTATATCATGATCATCG
AGTATATTGATGGCATAGAGTTGTGTGATATACCTGATATTGATGATGTGCTAAAAAATAAAATTCAGCAATCAATTAAT
TCCTTACATCAACATGGCATGGTTTCTGGCGACCCCCATCGTGGTAACTTCATTATAAAAAATGGTGAGGTTCGAATTAT
TGATCTCTCCGGAAAACGTGCTTCAGCGCAGCGTAAAGCGAAAGATCGTATTGACTTAGAGCGTCATTACGGTATTAAAA
ATGAGATTAAAGATCTAGGCTATTATCTTTTAGTATATCGTAAAAAAATGCGCAATTTTATGCGGCGTTTGAAAGGGAAA
CCAGCGCGCTAAAATAGAAATACCCACAATTACATGTCTTCACCAGGACAGTTTTAAACGGAGTTATTTATTTCACAGGT
TTATCATGAAGAATATTAGATACATTGACAAAAAAGATGTTGAAAACCTGATTGAAAATAAAACATCTGATGATGTTATT
ATTTTTCTTTCTGGCCCTACATCGCAAAAAACACCTTTGTCAGCATTACGAACAAAGGATATTATTGCTGTCAATGGTTC
TGCGCAATATTTGTTAAGTCATAATATCGTTCCTTTTATATATGTACTTACAGATGTCCGCTTTTTACATCAGCGTCGTG
ATGATTTTTATAAATTTAGCCAGAGAAGTCGTTATACCATAGTAAACGTTGACGTTTATGAACACGCTTCCAAAGAAGAC
AAACTTTATATCCTCCAGAACTGCCTCGTATTACGATCTTTTTACCGCCGAGAAAAAGGCGGTTTGATAAAGAAGATTAA
ATTTAATATTTTGAGCCAGATTCACAAAGAACTGCTGATCTCTGTACCGTTGTCTAAAAAAGGTCGTCTGGTTGGATTTT
GCAAGGACATTAGTCTTGGTTATTGCTCATGCCATACTATTGCCTTCGCTGCAATTCAAATAGCATATTCACTTAAGTAT
GCACGGATTATTTGTTCTGGTCTTGATTTAACGGGTAACTGCTCTCGTGTCTATGACGAAAATAATAATCCCATGCCCTC
GGAATTGAGTAAGGATTTATTCAAAATCTTGCCATTTTTCCGTTTTATGCGTGATAATGTAGATGATATTAATATTTATA
ATTTGTCGGATGATACAGCAATTCAATATGATATCATTCCATTTATGGAACTGTCATAAATTTTATAATCTTGGGTTTGC
TAAAAAATAATCTAGTATTTTCTATGTCTTTATTTCGTATTATCAAAATATTGGAGTTGGCTAATAATGATTAAAAAGAT
AATATTTACCGTCACACCAATATTTTCTATACCGCCAAAAGGAGCTGCAGCGGTTGAAACATGGATTTATCAGGTCGCCA
AAAGACTTTCGATTCCAGCAACTATCGCATGTATTCGAAACGACGGCTACCCTATCTACACAAAAGTAAATGATAATTGT
GATATTCACTACATTGGTTTTAGTCGAGTCTATAAACGACTTTTCCAAAAGTGGACTCGACTTGATCCTGTGCCGTATTC
TCAGCGCATTTTAAATACTCAACCTAAAAATGCTGATCCGAAAGACTCAGTTATTGTTATCCACAATAGTATGAAGCTGT
ATAAACAGATTCGTGGCAGAAGCCCTCAAGCGCAGCTAGTCATGCACCTTCACAATGCTTTTGAACCAGGGCAGTTAGAC
AAAAATGCAAAGATAATTGTTCCTAGCCAGTTTCTGTTCGATTTCTATTCGGAAAAAATGCCTGATGCAGATATCGCTAT
TGTGCCTAATGGTTTTTGCTCTGAATCGTATTCACATGATAATACTGAAAATTTAAGGAAGAAATTTAACATAGATGCGA
ATGATACGGTGTTATTATTTGCAGGAAGGATATCGCCAGATAAAGGCTGTCTGATGCTTATGGATGCTTTCAATAAGCTG
TGTAAGGATCGAGACAATCTTAAATTGGTTATTGTTGGTGATCCTTTTGCCAGTAAAAAAGGTGAAAAAGCTGAATATCA
GAATAAGGTTCTGGATGAAGCGAAAGCTATTGGCGCGCAATGTATTATGGCGGGTGGGCAGCCACCGGAGCAGATGCATA
AATATTACCGCTTAGCAGATTTAGTTGTTGTTCCTTCCCAGGTAGAAGAAGCTTTTTGCATGGTAGCAGTTGAAGCGATG
GCGGCTGGTAAACCTGTTCTTGCAAGTCAAAAAGGTGGGATAAACGAGTTTGTTCTGGAAGGAATAACAGGATATCACCT
TGCAGAACCTATGACGTCTGAAAGCATTCTCTCTGATATCAACCGGGTCTTAGCAGACAGTAATAAAGCACAAATTGCCG
AAAATGCCCAGAAATTCGTTTTTTCAAAATATAGCTGGGAACATGTAACTCAGTGTTTTGAGGCACAAATGCAAGACTGG
TTTGGTTAAAAATTATTTGATTTGAAGAGCCTGCCTGAACTCAATGTCAGGCAGGCTTTTTTTTATTTATTCCGCATAGC
TAACAGCAAACCAACAATCAAGCCAATTGGTTTGAGATCAACTTCCTCGAAATTACCTCGGATAATATAAAAACCAACAA
GAGTTAAAAATAGCAGTAATTGACCATTATAAGGAGTGACCACCACTTTTTTAAATGTTGCGTTAGCTGTTTCTTTGATA
ATAGAGCCATACAGATAAAGTAAAGCGAGTAGCCCAGCTAAACCTGCTGCAAACCAAATTGATAAAATAATGTTGTGTGG
TCCAATGGATTGTCTGAAAGTCCATGATGGAAAATCTACGACACGCTTATTGTATATTGCATGGTAAATATCATCGCCAT
AGCCATATCCCTTAAGCGGGTTCTCCATAATTAATGTCCATGCTGTACCTTGTGTACCATTGGTATAGCGATAAGAACTG
TCGGTCTGTTGAAGTTTATAAATAAGCCTATCTTCATCGGTATGATCACCTTTAAAGGTAAATACGCAAGTTGCTGCAAC
AGAAATAACGATAGAGGTCAGCATCAATAATTTCCACTGACGATTTAAGATTAACCATAGTAGAGTCACTATGAATACTG
CCAGCCATGCACCACGAGAGAGCGTTCCTAATAGCAGAAACAAGAAAACTGCGCTAAAAATTATGAATATTATTTTATAA
GAGGTTTTCTTGATAAGCCAAAGGTTTAATAATGCTGGAAATAGAAACACCATTGAGTCGGAAATACTACGATGTTCATA
GGTCGAAAATGGCATTATTCCTTTATTATAATCCTGAATATAAGAAATAATTTCAACAAGACAACGTAACCCAAGCCCGG
TAACTAATGAGTATAGTACAACTTTACCGATGCTTTCATTATCTTCATCTTTTAATAATACGGGTATAAGTAAACTATAT
GCCAAAAATCCTTTTAGCACCGTGTTACTGAATTCTTTAAAACTTATTTTCAGATCTGGTGATATGAAAGTGGCATATAA
AAGAATGAGTGACAGAGCCAAGACACTATAAAAAAGATTATTTTTGTAGAGCTCTTTGAATGTCCCTGGAGCACGGAAAA
CTTGATAAATTACCGTAATAATCATTAGTACAGATATGATATGTTTATAACGGGTAATACCATCAAGGAAAAAGGTCGCA
ATAAAAAGGAATACCAACACTCTATTCCAGTATGGTTTCCAATTCTCTTTATTACGCAGCGCCAGCGAGGCTGTTAACAT
TGCTTCTCCACCATCTTAATAATATAGAACGTGTTAATCAGGATTGATTTTTTTAAATACTGTTTCTGCAGCCAGATGAG
CAAGATCTTTATCCGGAGCCCTACAAACCATCTGATTCTTCCCATACCCACCAATTAATCCCGGATCGGTAGGTCCATAA
ACCGTGATATTGGGTCTATCCAGTGCCGCCGTTAAATGGCTTAACCCCGTATCCACCGACACTACAAATTTAGCCCCGGC
CAGTACGCGGGCAACGCCTTCCAGACTCATCTTCGGCAATACTTCAACATAAGCAAATCCTTCCGCCAGTCGTTTCGCCC
GTTCTTCCTCATGCGGCGCGCCCCACGGAAGTTTAATCCGTATTCCTGAATCAGCCAGTAAACCAATCAATTCTCGCCAG
TGTTCTTCCGGCCAGTGTTTATCATCTCGGGTTGTTGCATGAAGAAATACGGCATATTCGCCAGCATCTGTAGGCAGGTT
CGTCAGGAAATGCTGTGCGATAGCATAATCGCCCTGGGTTTGCGGTTTGCTATAGCCCAGACTTTTGGCAAACAGTTCGC
GGGTGCGTTCTACGGCGTGCTGCTGTTTTGCAATATGATGCTTACGATTGTAAAACAGGCTGGCTAAAGGTTCGCGAGCG
GTTTGCCAGTCCATTCCATGCTTTACGCCATGCGCCAGACGCGTCACCAGCGCCGCGCTTTTTACCAGCCCCTGAGCGTC
GATAATTGCGTCATAGTTCTCTGCTTGTAGCGCTTCACGAAACGCTTTCCGTTCAGCTTTTATGGGGGCCGAGAACCAGG
CTTTACGCCAGCGACGTATTGCCACAGGAATAACTCGCTCAACGGCGGCGTGCCAGGAAGGAATCTGTGCGAACCCTTCT
TCCACCACCCAGTCAAACTTAATCCCCGGGATTGCCTGCTGGGCATCAGTGAGTGCGGGCAACGTATGGAGAACATCGCC
CATCGACGATGTTTTAACGATCAAAACCCGCATCCGTCAGGCTTCCTCTTGTAACAATAGCGCGTTGAGTTCTTCCAGTA
CGCGCTGGGGAGTAATGTCGATCAAGCTCTGGTGATAACCCTCCGCAGCGTCACCTTTACGCACTTTGTGATAGCCGGTA
ATCAGGCGGATCACACGCGCTTTATGGGATAGCGGCGGTGTGAAGTCCGGGCTACTCGGACCATACAGGGCAACCAGCGG
ACGATTGAGCGCCGCCGCAACGTGCATCAGGCCAGAATCGTTAGTGACAATGGCTTTACAGGCTGCAATCAGGATAACTG
CTTGATCAAGCTGTGTTTCCCCCGCCAGGTTCCGGCACCATGCCTGCTGCTCGGTATTCAAAGCGGCAAGAATCTCATTG
CCCGCTTCATGATCTTTCGCCGAGCCAAACAGAACCACCTGATAACCTTCATCAATCAGCTGCTTTGCCAGCTCAGCATA
GTGGTAGTGTGGCCAGCGTTTTGCCGGACCAAACTCCGCCCCCGGGCAAAAACCAATCATCGGACGTTCTGATGAAAGCG
AAAATTGATTACAGGTATATGATTTTTCACCTTCGCTCACCTGCAACTGCGGCCATAACAGCGGTTTTGGTAGATCTTGT
GCGGTACGCATTACGCCTTTGTCATAGGCCAGCGCAACATAGCGTTCCACCATTAGCGGCCAGGCTTCTTTATCGAGCAC
GCGCACATCGTTGAGTAAACCGTAGCGCATTTCACCGCGCCAGCCGGTGCGATGAGGGATCCCCGCGAAGAAAGGCACTA
ACGCGGATTTGAAGGAGTTGGGTAAGACGTAGGCACGGTCGTAGCGTTTTTCGCGCAGACTATGACCCAGCTTGCGGCGT
TCGCCGATTTCCAGCGCCCCGTGACCGAGGGGCATAGGGATGGCTTCGTTAACTTCCGGCATCCGCGATAATAACGGACG
GCACCAGGCCGGTGCCATCACGTCGATTATCGCCTGGGGATAGCGCGCCTGGAGCGTGCGATAGAGACTTTGCGACATCA
TCATGTCGCCAACCCAAGACGGGCCGATCACCAGTATTTTCATGCAGAGCTCTTATGCGTCACGATTCAGCCAAGCCATG
TATTCCGTTACACCTTCGGCAACGGTTTTGAACGGTTTATCGTAACCCGCCGCGCGCAGATTCGTCAGATCTGCCTGCGT
GAATGCCTGGTAGCGGCCTTTCAGTTTATCCGGGAACGGAATGTATTCGATTTGGCCTTTCTTGTGATAAGCAAGCGTAG
CATCTGCTACAGCCTGGAAGGATTCCGCACGACCAGTACCGAGGTTGAAGATGCCGGAAACGCCATTTTCCAGGAACCAC
AGGTTTACATCTGCCACGTCGCCCACATAGACGAAGTCGCGTTTAAAGTTCTCGCTACCTTCGAACAGCTTCGGTGATTC
ACCGTTATTAAGCTGGGTGTTGAGATGGAAAGCGACGCTCGCCATGCTGCCTTTATGGCCTTCACGCGGCCCATAAACGT
TGAAATAGCGGAAGCCAACAATCTGTGAGTTTGCTTCTGGCAGGATTTGGCGAACATATTCATCAAACAGGAACTTCGAA
TAACCGTAGACGTTCAGCGGTTTTTCGTATTCACGGGATTCAATAAAGTCGGAGGTGCGTCCGCCGTAAGTGGCTGCGGA
AGATGCATACAGGAACGGGATTTCGCGCTCCAGGCAGTAGTGCAGCAGCTCTTTGGAGTATTGATAGTTGTTATCCATCA
TATACTTGCCATCCCACTCGGTGGTGGAAGAGCATGCGCCTTCGTGGAAAATCGCTTCGACATCGCCGAACTCTTCGCCA
GCCATAATCTGGATCAGGAAGTCTTCCTTATCCATATAGTCCGCGATATTCAGATCCACCAGGTTCACAAACTTGGTGCC
GTCTTTCAGGTTGTCCACCACCAGAATATCGGTGATGCCTTTATCATTCAGGGCCTTAACGATGTTGCTGCCGATAAAGC
CCGCGCCGCCGGTAACGATGATCATAACTGTAACCTTCGAATTATGGAGTCAGAGACAATCTCAGACACGAATACTTCTA
TCATATCACTACATGACGTTGGCTTCAGCCATTCACCAAAAGTGAGGGGGCTGGACGTTATTTATCCTGAATTTTGCAGA
AGTGTTAACGCGTCATCTCGTCGCGACCTATAAGTTTGGGTAATATGTGCTGGAATTTGCCCTGTCTGGAGAATCGCAAT
GCGTGGAGAATTTTATCAGCAGTTAACCAACGATCTGGAAACCGCACGGGCGGAAGGGTTGTTTAAAGAAGAGCGCATTA
TTACGTCTGCGCAGCAAGCAGATATCACTGTGGCTGATGGAAGCCACGTCATTAACTTTTGTGCCAACAACTATCTCGGA
CTGGCGAATCATCCGGATCTGATTGCGGCGGCAAAGGCGGGAATGGATTCTCACGGTTTCGGCATGGCTTCGGTGCGTTT
TATTTGCGGCACTCAGGACAGCCATAAAGAGCTTGAACAAAAACTGGCGGCCTTCCTGGGGATGGAAGATGCCATTCTCT
ACTCTTCCTGCTTTGATGCTAACGGTGGCCTGTTCGAAACGCTGTTAGGCGCGGAAGACGCCATTATCTCCGACGCACTG
AACCACGCGTCTATTATTGATGGTGTGCGTCTGTGCAAAGCTAAACGCTATCGTTATGCCAACAACGATATGCAGGAGCT
GGAAGCACGTCTGAAAGAAGCGCGTGAAGCCGGTGCGCGTCATGTGCTGATTGCCACCGATGGTGTGTTCTCGATGGACG
GCGTGATTGCCAACCTGAAAGGTGTTTGCGATCTCGCAGATAAATACGATGCCCTGGTGATGGTAGACGACTCCCACGCG
GTCGGTTTTGTCGGTGAAAACGGTCGTGGTTCCCATGAATACTGCGATGTGATGGGCCGGGTCGATATTATCACCGGCAC
GCTCGGTAAAGCGCTGGGTGGCGCTTCTGGCGGCTACACGGCGGCGCGCAAAGAAGTGGTTGAGTGGCTGCGCCAGCGTT
CTCGTCCGTACCTGTTCTCCAACTCGTTGGCACCGGCGATTGTCGCCGCGTCCATCAAAGTGCTGGAGATGGTTGAAGCG
GGTAGCGAGCTGCGTGACCGTCTGTGGGCGAACGCGCGTCAGTTCCGTGAGCAAATGTCGGCGGCGGGCTTTACCCTGGC
GGGAGCCGATCACGCCATTATTCCCGTCATGCTTGGCGATGCGGTAGTGGCGCAGAAATTTGCCCGTGAGCTGCAAAAAG
AGGGCATTTACGTCACCGGTTTCTTCTATCCGGTCGTTCCTAAAGGTCAGGCGCGTATTCGTACCCAGATGTCTGCGGCG
CATACCCCTGAGCAAATTACGCGTGCAGTAGAAGCATTCACGCGTATTGGTAAACAACTGGGCGTTATCGCCTGAGGGTG
TGAGATGAAAGCGTTATCCAAACTGAAAGCGGAAGAGGGCATCTGGATGACTGACGTTCCTGTACCGGAACTCGGGCATA
ACGATCTGCTGATTAAAATCCGTAAAACAGCCATCTGCGGGACTGACGTTCACATCTATAACTGGGATGAGTGGTCGCAA
AAAACCATCCCGGTGCCGATGGTCGTGGGCCATGAATATGTCGGTGAAGTGGTAGGTATTGGTCAGGAAGTGAAAGGCTT
CAAGATTGGCGATCGCGTTTCTGGCGAAGGCCATATCACCTGCGGTCACTGTCGCAACTGTCGTGGCGGTCGTACCCATC
TGTGCCGCAACACGATCGGCGTCGGTGTTAACCGTCCGGGCTGCTTTGCCGAGTATCTGGTGATTCCGGCGTTCAACGCC
TTCAAAATCCCGGACAATATCTCCGACGACCTGGCTTCCATTTTTGATCCCTTCGGTAACGCTGTGCATACCGCGCTGTC
GTTCGATCTGGTTGGCGAGGATGTGCTGGTCTCTGGTGCAGGTCCGATAGGTATTATGGCTGCGGCGGTGGCGAAACACG
TTGGTGCACGCAATGTGGTGATCACTGATGTTAACGAATACCGCCTTGAGCTGGCACGCAAAATGGGTATCACCCGTGCG
GTTAACGTCGCTAAAGAAAACCTTAATGATGTGATGACAGAACTGGGCATGACCGAAGGCTTTGATGTCGGTCTGGAAAT
GTCCGGTGCGCCGCCAGCGTTTCGTACCATGCTCGACACCATGAACCACGGTGGTCGTATTGCGATGCTGGGTATTCCAC
CGTCCGATATGTCTATCGACTGGACCAAAGTAATCTTTAAAGGCTTGTTCATTAAAGGTATTTACGGTCGTGAGATGTTT
GAAACCTGGTACAAGATGGCGGCGCTGATTCAGTCTGGCCTCGATCTCTCGCCGATCATTACCCATCGTTTCTCTATCGA
TGATTTCCAGAAGGGCTTTGACGCTATGCGTTCGGGCCAGTCCGGGAAAGTTATTCTGAGCTGGGATTAACACGAACAAG
GGCTGGTATTCCAGCCCTTTTGCCTGAGGATAATCCGTTAAATATGTAAAATCCTGTCAGTGTAATCAAGAGTTCGTAAT
TGCGCTGATCTCTTATATAGCTGCTCTCATTATCTCTCTACCCTGAAGTGACTCTCTCACCGGTAAAAATAATATCTCAC
AGGCTTAATAGTTTCTTAATACAAAGCCTGTAAAACGTCAGGATAACTTCAGAGGTCGTCGGTAATTTATGATGAACAGC
ACCAATAAACTTAGTGTTATTATTCCGTTATATAATGCGGGCGATGATTTCCGCACTTGTATGGAATCTTTAATTACGCA
AACATGGACTGCTCTGGAAATCATTATTATTAACGATGGTTCAACGGATAATTCTGTTGAAATAGCAAAGCATTACGCAG
AAAACTATCCGCACGTTCGTTTGTTGCATCAGGCGAATGCTGGCGCATCGGTGGCGCGTAATCGTGGGATTGAAGTAGCA
ACGGGAAAATATGTCGCTTTTGTCGATGCTGACGATGAGGTCTATCCCACCATGTACGAAACGCTGATGACCATGGCGTT
AGAGGACGACCTCGACGTGGCGCAGTGCAACGCTGATTGGTGTTTTCGTGAAACGGGTGAAACCTGGCAATCCATCCCTA
CCGATCGCCTTCGCTCAACCGGTGTATTAACCGGTCCGGACTGGCTGCGGATGGGGCTTTCTTCCCGCCGTTGGACACAC
GTGGTCTGGATGGGGGTTTATCGCCGCGATGTTATTGTTAAAAATAACATTAAATTTATTGCCGGATTACATCATCAGGA
TATTGTCTGGACAACAGAATTTATGTTTAACGCGCTGCGTGCGCGATATACCGAGCAATCATTATATAAATATTATCTGC
ATAATACGTCAGTGAGTCGGTTGCATAGACAAGGGAATAAAAACCTTAATTATCAACGTCACTATATTAAGATTACCCGC
CTGCTGGAGAAATTAAATCGAAATTATGCCGACAAAATTACGATTTATCCGGAATTTCATCAGCAAATAACTTACGAAGC
ATTGCGTGTTTGCCATGCGGTGCGCAAAGAGCCGGATATTATTACCCGCCAACGGATGATTGCTGAGATATTTACTTCCG
GTATGTATAAGCGCCTGATTACTAATGTGCGCAGCGTGAAGGTGGGTTACCAGGCGTTACTGTGGTCTTTCCGCTTATGG
CAATGGCGCGACAAAACGCGGTCGCACCATCGCATTACGCGTAGCGCCTTTAATTTGCGCTAGCGTTAAGTTTTGCCGCT
TCGGGCTGTTTGCCCCAGCCTTGCCACTGATGCTGGAAGTAAACGATCAGCGTGCTCTGGCTGATGCTTTCGCTTAATAC
TTCAAAGAAGCGATTAGCATAAACAGGTTCCAGCGGCTTCTTCGGTTTGCACAGCTTCACGCCACGGAATGGATTACGCG
GTGTGTCGGGCACAGTGTTTTTCGGCGGTGTAGACGTATCAACCTGCGGTTCATTCAACAAGCTGCTGGCTTTCACCAGC
GTAATGTCTGGCGGCAGGTTATAAACCATCTGTTGTAGCACGCGTACCGTTGAAGGGTGAGGATGCCCAATGGCAATGGT
TGAACCGTTGCGACGCGCCAGATCAATTGCGCGATTAAATTGCACACGGATGTCCGCTTCGTTCTGCGAATCGTCGAGGA
ACACCTTCCGTTTGATCACCTTCACGCCAGTGCCTTGCGCGGCGCGCATCGCCTGGGTATTACCGATGGTTACGCTGTCG
AGGAAGTAAAGATTGTAACGCTCCAGCGCCTGCATCACTTTCTGCATACCAAACAGGTTAGAGGTCATCTTGCTGCCCAT
GTGGTTATTGATCCCCACGGCATAGGGCACGTTATTGACCGCACTACGAATAATGCGCTCAATTTCGTCGCTGCTCATCT
CCGGGCGTAGCGTATTTTTCTCCAGCGGCTGTTTACTCAGTGGTGCCATCGGTAGATGAATCAACACTTCGTGACCGCTG
TTATGTGCTTTGGTCGCCATCTCTCTGGCGTGTGGTGAATCGGGTAATACCGCAACGGAGATAGCGGAAGGCATCGCCAG
CACCTGGTTTTCGTTGTGCGGGCGATACCCAAAATCATCAATGACGATGGCAAGTTTGCCAGCAATTACGGGGGAGGAGA
GCGCCAACAGAGCGGCAAATGCAAGAACGTTACGACGAAATGGAAACAAAACTTATCTTCCCAACCACGGCTGTGGATTG
ACCGCCTGACCCTGGCGGCGAATTTCGAAATAGAGTGAAGGCCGACCCTGACCGCCACTGCTGCCCACCAGTGCAATTGG
CTGGCCCGCGCGAACCTGCGAACCAACGCTCACCAGTGCGCTCTGATTATAGCCGTAAAGACTCATGTCGCCTTTACCAT
GCTCAACCACCACCACCAGACCGTAGCCTTGCAGCCAGTCAGCCAGAATCACCCGGCCGTCGGCAATCGCTTTAACTTCA
GTACCTTCAGAGGCACCAATCACCATCCCTTTCCAGCGTAATTCACCCTGTAGCTGTTCGCCATAGCGATGCAGCGTCGG
CCCGCGAACTGGCCAGAATGCCTGACCGCGCGGTGCGCCCAGACCACCGGTACGGGACATCAGCGATTTTTCGCTTTCGG
TCGGCTTGTAGGTGGTGCCTTTGCGCGTCGCTTCTTTCTGGCGGTCGCGAACCGCCTGGGCTTCGCGGGCTTCACGTTCA
GCACGCGCTTTCGCCGCAGCTTCCGCACGGGCAATGCTGTTACGCAGGCGGGATTCGTTGGCGCGCAGCTCGCTCAACTG
TTGCTGACCTTGCTGGATGGAAGACTCCAGCCCTGCCAGCGTCTTTTTACGCTCGCTCAACGCCTGGGTCAGCTTCGCCT
GTTGGGCGCGCTGCTCATATAAAAGCGTTTGTTGCTCGCTTTGTTTCTCTTCCAGTTCGGCACGCTGCATAGCGACTTCT
TCACGCGTTTGTTTCAACTGAGCAATGGTTTCTTGTCGCGCCTGGTTGAGATAGCCGAAATAAGCCTGTAACCGCTGCCC
ACGCTGGCTTTCTTCACCGCTGAGAATCAGCTGAATACCGGTATGTTCACCCTGACGAAACGCGGCATCCAGTTGCGCGG
CGAGGCTGCGCTCCTGGGCGGCTTTTTGCTGCTCCAGTTTGGCAATCGACGCGTTCATCTCATCAATCTGTTTATTCAGT
TGATTGAGCGTATTTTGCGTTTCGCGCAGTTTGCGAGTGGCTTCAGAGATCGCTTCTTCCTGCTTTTTCAATTGTGCGAG
CAGGCTTGCGCGTTGTTGTTGCTTTTGGCGTACCGCGCGCTCTTTCGCGGCGATATCGGCCTGAATGGATTTGAGTTGGT
CACGCTCATCCGCGTGGGCGGAAAAGGCGCACAACAATACGCCAGCGCTCAGAACGCTGGCGTAGATGATGGGCCTGATT
GCAAACCTGCGCGGTTTCACGGCCCGTGTCATGGTATTAATCGCCTTTCCCCTCATGGGGAGGGATTATTCCACGATGAA
CAGCGGCTTACCAGTCATCTCTTGCGGGATTTCCATACCCATCAGCGACAACATGGTCGGCGCGATGTCAGAAAGTTTGC
CGCCTTCAACCGCTTTCACGTTCTTATCACCAACGTAAATCAGCGGAACTGGCAGGTTGGTGTGTGCTGTGTGTGCCTGA
CCCGTTGCCGGATCGCGCATCTGTTCAGCGTTACCGTGGTCAGCGGTGATCAGCAGTTGTCCACCCACGGACTCAACCGC
TTTCGCGACTTCTTCCACGCAGTGATCCAGCGCTTCAACCGCTTTAACCGCCGCTTCCATCACTCCGGTGTGACCTACCA
TGTCGCCGTTCGGATAGTTACAAATAATGGTGTCGTATTTGCCGCTCTTGATTGCCGCAACCAGTTTTTCGGTCAGCTCT
GCGGAGCTCATTTCCGGTTGCAGATCGTAGGTAGCCACTTTCGGTGAGTTGATCAGAATGCGATCTTCGCCTTTGAACGA
CTCTTCTACGCCACCGTTGAAGAAGAAAGTAACGTGGGCATATTTTTCGGTTTCGGAAATACGCAGCTGAGTTTTGTCGT
TTTTCGCCATCCATTCGCCGAAGGTGTTAACCAGGGAAGCGGGTGGGTAAGCCACTGCGGTTTTGATGTCGGCAGCGTAT
TCGGTCAGCATCACGAAATCGACGTTAACCACTTTCTTACGCGCGAAGCCGTCAAAATCGGCATTTACGAATGCACGAGT
GATTTCACGCGCGCGGTCAGCACGGAAGTTCATGAAAATCAGTGCATCGCCGTCTTCCATTGCCGCATCTGGCTGACCTT
CTGCACGAATAACGGTCGCTTTCACGAACTCGTCGTTTTCGTCGCGAGCATAAGCAGCCTGCAAACCGGCAACGGCGGTA
TCGGCCTGGAACTCACCTTGCGCCAGAGTCAGCAGGTCATAAGCTTTTTCAACGCGATCCCAACGGTTATCGCGGTCCAT
CGCGTAGTAACGACCAATGATGGACGCTACGCGGCCTTTACCCAGCGCGGTAAATTTCTCTTCGAATTTTTTCAGCGAGG
ATTCAGCACTGCGCGGCGGAGTGTCGCGACCGTCAAGGAATGCGTGTAGGTAGATTTTTTCTGCGCCGCGTTCAGCTGCC
AGTTCTACCATCGCCATGATGTGATCTTCGTGGCTGTGTACACCACCTGCGGAGAGCAGACCCATAATGTGTACTGCTTT
GCCTGCGTTTTTCGCTTTATCTACTGCACCAGTCAACACCGGATTAGCAAAGAAAGCGCGATCTTTGATTTCAACGTCCA
GACGAGTCAGGTCCTGATACACGATGCGGCCGGCACCCAGGTTAACGTGGCCTACTTCGGAGTTACCCATCTGACGGTCA
GGCAGACCGACTTCCAAACCGGAAGCGTCGATCAGGGTATGCGGACGATTGGCCCACAGTGCATCCATTACCGGGGTTTT
AGCACTAAAAATGGCGTTATCCTGCTGTTCTTCGCGATAGCCATAGCCATCCAGAATCACCAGTACCATAGGTTTTTTAG
AAACCGACATTGCGACAACCTCATACTCAAGAGTCAAAATTTGCGTAATTTTACTACAGCTGAATCGATAAAATAGCCCC
TGAAGATCAAAATATACGACCGCTCGCGGCAAGCAGATGCCAGATTTACGCTTTTTTTTCGTAGCGCCCCGCAAAATTGC
ATTCCAGTTAACGCGCTGGCTGTATTTGCCGCACTGCGCAGGTATACTCCTTTCCTGGTTTTTTTAATCACTACGTCGGG
AGTTGTTACCCCCCATGCAAGAAATTATGCAATTTGTTGGCCGTCATCCCATACTGAGTATCGCCTGGATCGCGTTACTG
GTGGCGGTTCTTGTGACTACGTTTAAGAGCCTGACCTCGAAAGTGAAGGTGATTACTCGTGGTGAAGCTACGCGTCTGAT
CAACAAAGAAGACGCTGTGGTTGTGGATTTACGTCAGCGTGATGACTTCCGTAAAGGCCATATCGCAGGTTCTATCAACC
TGTTGCCGAGCGAAATCAAAGCCAACAATGTTGGTGAGCTTGAGAAGCACAAAGACAAACCGGTTATCGTGGTAGATGGT
TCTGGCATGCAGTGCCAGGAGCCTGCAAACGCGCTGACGAAAGCTGGTTTTGCGCAAGTATTCGTACTGAAAGAAGGCGT
CGCTGGCTGGGCTGGCGAAAACTTGCCTTTGGTGCGCGGCAAATAATTTACCTGCCGTTTTTCATGATGCAGGCCGTTAG
CTGCAATTAGGCCCCCAGCGACTTATTGATATAAGCTTCTGGGGACACTCCATTTTGCTGCCGCCCTGCAACATGAAATT
TCAGGGTAAAAAACAGGAGCTAATTTATGGCCAATGTTGAAATCTATACCAAAGAAACCTGCCCGTATTGCCATCGTGCA
AAAGCACTGCTGAGCAGCAAGGGCGTGAGTTTTCAGGAGTTGCCGATCGATGGCAATGCCGCTAAGCGTGAAGAGATGAT
CAAACGCAGCGGTCGCACCACGGTTCCACAGATTTTTATTGACGCACAGCACATTGGTGGCTGTGATGACTTGTATGCAT
TGGATGCACGTGGTGGACTGGATCCCCTGCTGAAATAACGTGTGAACGTTGGCATTACATTGCGCAGTATTTTAAGGACA
ACACTTAAGGGTTTTCTACACATGTCAGAACAAAACAACACCGAAATGACTTTCCAGATCCAACGTATTTATACCAAGGA
TATTTCTTTCGAAGCGCCGAACGCGCCGCACGTTTTCCAGAAAGATTGGCAACCAGAAGTTAAACTTGATCTGGATACGG
CATCTACTCAACTGGCAGATGACGTTTACGAAGTGGTACTGCGTGTTACCGTAACGGCCTCCCTGGGCGAAGAAACCGCG
TTCCTGTGTGAAGTTCAGCAGGGCGGTATTTTCTCCATCGCGGGTATCGAAGGCACCCAGATGGCACATTGCCTGGGCGC
ATACTGCCCGAACATTCTGTTCCCGTATGCTCGTGAGTGCATCACCAGCATGGTATCCCGCGGTACATTCCCGCAACTGA
ACCTTGCGCCGGTTAACTTCGATGCGCTGTTCATGAACTATTTGCAGCAGCAGGCTGGCGAAGGTACTGAAGAACATCAG
GATGCCTGATGAACCAACGTAATGCTTCAATGACTGTGATCGGTGCCGGCTCGTACGGCACCGCTCTTGCCATTACCCTG
GCAAGAAATGGCCACGAGGTTGTCCTCTGGGGCCATGACCCTGAACATATCGCAACGCTTGAACGCGACCGCTGTAACGC
CGCGTTTCTCCCCGATGTGCCTTTTCCCGATACGCTCCATCTTGAAAGCGATCTCGCCACTGCGCTGGCAGCCAGCCGTA
ATATTCTCGTCGTCGTACCCAGCCATGTCTTTGGTGAAGTGCTGCGCCAGATTAAACCGCTGATGCGTCCTGATGCGCGT
CTGGTGTGGGCGACCAAAGGGCTGGAAGCAGAAACCGGACGTCTGTTACAGGACGTGGCGCGTGAGGCCTTAGGCGATCA
AATTCCGCTGGCGGTTATCTCTGGCCCAACGTTTGCGAAAGAACTGGCGGCAGGTTTACCGACGGCCATTTCGCTGGCCT
CGACGGACCAGACCTTTGCCGATGACCTCCAGCAATTGCTGCACTGTGGCAAAAGTTTCCGCGTTTACAGCAACCCGGAT
TTCATCGGTGTGCAGCTTGGCGGTGCGGTGAAAAACGTCATTGCCATTGGCGCGGGGATGTCCGACGGTATCGGTTTTGG
CGCGAATGCGCGTACGGCGCTGATCACCCGTGGACTGGCTGAAATGTCGCGTCTTGGCGCGGCGCTGGGTGCCGATCCTG
CCACCTTTATGGGCATGGCGGGGCTGGGTGATCTGGTGCTTACCTGTACCGACAACCAGTCGCGTAACCGCCGTTTTGGC
ATGATGCTCGGTCAGGGCATGGATGTACAAAGCGCGCAGGAGAAAATTGGTCAAGTGGTGGAAGGCTACCGCAATACGAA
AGAAGTCCGCGAACTGGCGCATCGCTTCGGCGTTGAAATGCCAATAACCGAGGAAATTTATCAAGTATTATATTGCGGAA
AAAACGCGCGCGAGGCAGCATTGACTTTACTAGGTCGTGCACGCAAGGACGAGCGCAGCAGCCACTAAACCCAGGGAACC
TTTGTTACCACTATGACCCGGCCCGCGCAGAACGGGTCGGTCATTATCTTATCGTGTGGAGTAAGCAATGTCGTGTGAAG
AACTGGAAATTGTCTGGAACAATATTAAAGCTGAAGCCAGAACGCTGGCGGACTGTGAGCCAATGCTGGCTAGTTTTTAC
CACGCGACGCTACTCAAGCACGAAAACCTTGGCAGTGCACTGAGCTACATGCTGGCGAACAAGCTGTCATCGCCCATTAT
GCCGGCTATTGCTATCCGTGAAGTGGTGGAAGAAGCCTACGCCGCCGACCCGGAAATGATCGCCTCTGCGGCCTGTGATA
TTCAGGCGGTGCGTACCCGTGACCCGGCGGTGGATAAATACTCAACCCCGTTGCTATACCTGAAGGGTTTTCATGCTTTG
CAGGCGTATCGCATCGGTCACTGGTTGTGGAATCAGGGGCGTCGCGCACTGGCAATCTTTCTGCAAAACCAGGTTTCTGT
GACGTTCCAGGTTGATATACACCCGGCAGCAAAAATTGGTCGCGGTATCATGCTCGACCACGCGACAGGCATCGTCGTTG
GTGAAACGGCGGTGATTGAAAACGACGTATCGATTCTGCAATCTGTGACGCTTGGCGGTACGGGTAAATCTGGTGGTGAC
CGTCACCCGAAAATTCGTGAAGGCGTGATGATTGGCGCGGGCGCGAAAATTCTCGGTAATATTGAAGTTGGGCGCGGCGC
GAAGATTGGCGCAGGTTCCGTGGTGTTGCAACCGGTGCCGCCACATACCACCGCCGCTGGCGTTCCGGCACGCATTGTCG
GTAAACCAGACAGCGATAAGCCATCAATGGATATGGACCAGCACTTCAACGGTATTAACCATACGTTTGAGTATGGTGAT
GGGATCTGATGTCCTGTGATCGTGCCGGATGCGATGTAATCATCTATCCGGCCTACAGTAACTAATCTCTCAACACCGCT
CCCGGATACCCCAACTGCCGCCAGGCTTCATACACCACGACCGACACCGCATTGGACAGGTTCATGCTGCGGCTGTCCGG
CACCATTGGAATACGAATTTTTTGTTCAGCGGGCAGGGCATCAAGAATGCTCGCTGGCAGGCCGCGTGTTTCCGGGCCGA
ACATCAGATAATCGCCATCCTGATAGCTTACGGCGCTGTGAGCAGGCGTACCTTTCGTGGTGAGGGCAAACAGGCGCTGG
GGATTTTCTGCTTCGAGAAACGCGCGATAGTCATGATGACGCGTAACGGCGGTAAACTCGTGATAGTCCAGCCCCGCGCG
GCGCAGGCGCTTATCGTCCCAGGCAAATCCCATCGGTTCGATGATATGCAGACGAAAGCCGGTATTAGCGCAAAGACGGA
TGATGTTGCCAGTATTTGGCGGAATTTCTGGTTCGTAAAGTACGATGTTTAGCATACTGCCCCCTTAGTGCGGGGGCAGG
ATAGCAGATATTCGTCTAACCCTTAAGCTGCATTCCCTTTCGCCATTGGAGCCAGTGCCGCAGGCAACTCTTTACCCAGC
CCCTGCACCAGCGAATCTTGCGTAATTTCGCTAATCGATTTCGCGCCAGTCAGCGTCATCGCCACTTTCATCTCTTTTTC
GATCAGATTTAGCAGATTAGCTACACCCGCCTGGCCCGCTGTTGCCAGTGCATACAGGAAAGCACGACCCAGCAGTACGG
TGTCGGCACCGAGCGCAATCATACGCACGACATCAAGCCCGTTACGTATTCCGCTATCCGCCAGAATGGCGATATCACCT
TTCACCGCATCCGCAATAGCAGGCAGTGCACGAGCAGAAGAGAGTACGCCATCTAACTGGCGGCCACCGTGGTTAGAAAC
CACAATTCCATCTGCACCAAAACGTACTGCATCGCGCGCATCTTCCGGATCGAGGATCCCTTTGATCACCATCGGGCCAT
CCCAGAAATCGCGGATCCACTCAAGGTCTTTCCATGAGATGGACGGATCGAAGTTATTCCCCAGCCAGCCGATGTAATCT
TCCAGTCCGGTTGGTTTGCCGAGGTAAGCCGAGATATTACCTAAATCATGCGGACGACCGTTCAGGCCCACATCCCACGC
CCATTGCGGATGCGTCACCGCCTGCAAGTAGCGGCGCATTGCCGCGTTCGGGCCGCTCATCCCAGAATGCGCATCACGAT
AACGCGCTCCCGGTGTTGGCATATCCACGGTGAAAACCAGTGTCGAACAACCCGCTGCTTTTGCTCGCTCCAGTGCGTTA
CGCATAAAGCCGCGATCGCGCAGCACATAAAGCTGGAACCACATCGGACGTTTGATAGCTGGAGCGACTTCTTCAATCGG
GCAAACGGAAACCGTCGAGAGAGTAAACGGAATGCCATGCGCATCCGCGGCTTTGGCAGCCTGAACTTCGCCGCGTCGCG
CATACATGCCACACAAACCTACCGGACCTAGCGCCACCGGCATCGACAGTTTCTCATTAAACAGCGTCGTTTCCAGGCTT
AAGTCAGACATGTTTTTCAGAATACGCTGGCGCAGCGCCACTTCTGACAAATCTTCCACGTTGCGGTGCAGCGTGTATTC
AGAATATGCCCCCCCATCCATATAGTGGAACAGGAACGGCGGCAGAATGCGTTGCGCTGCGGCGCGATAATCGCTGGCTG
CGGAAATAATCATGCGTTTTTCTCCCTCGAATGCTCATTATGGTCACCAGGCAGGCGGGTAATGCGTGCATGGCGAGCCT
GATCTTCATCGAATCGTTTCATGGTGGTGTGAACAAAGCTAAGGTGCGCCATCATTGCTTTACGCGCCCCGTCAGCATCA
CCGGCAAAAATGGCGTCAATGACCGCCTGATGTTGTTCGGTCAGCTGTGAAAAAACCGGGGGTACCAGGTACATCCGCTG
GCGGCTATGCTTCACAGAGGATTGCAGGACATCGAAGAAACCGCGCATGGTTTGCAGCAGCACGATGTTATGTGAGGCTT
CGGCAATCGCCAGATGAAAACGAACGTCCGCTTGTGAGGCGAGATCCGGGTCTTCGCTGAGCGTTGCTTCAAAACAAAGC
TGAATCTTTTCTTTTTCGCCAGGCGTGGCACGCATTGCTGCATGCCATGCGGTGCTGGCTTCAATGGCGTAGCGGGCTTC
CAGAATATCGAAACTGTAATCCGGATCATCGGCCATCAGCGTTTTCAGCGGCTGGACGATGTTTTGCTCCGACCATGTGT
CATGACGCCAGCGAATAAACGTCCCGCCGCCGCGTCGACTAAGCAGCACGCCTTCGCTCACCAGTTTTGCCAGCGCCTCG
CGCAGTGAATTACGCGATACGCCGAGTTGCATCGCCAGTTGACGTTCAGCGGGCAACTTCATGCCCGCCTCCAGGTTTTT
TTCATCAATCAGCGCCCGCACACGATCGGCAACCTCGTCTGACAGGCGTCTGGGTAAAACAATCATTAAGGAATCATCCA
CGTTAAGACATAAGCCTGAAGCGTGGTGATCACGCCCACCATACAGGTGAAGATCAGGCTGTGTTTGACGGTAAAGCGGA
ACAGATCTGACTCTTTGCCTACCAGGCCTACCGCCGCACAGGCGATAGCGATAGATTGCGGAGAGATCATCTTACCGGTG
ACACCACCGGTGGTGTTGGCGGCAACCAACAACAGGTCAGAAACGCCAATTTGTTGTGCTGCAGTGGCTTGCAGCGCGGC
GAACAGGGCGTTAGATGAGGTATCCGATCCGGTCAGGAAGACACCAAGCCAGCCGAGGAACGGCGAGAAGAAGGTGAATG
CATGGCCGGTGTGCGCCAGTGCCAGCGCCAGCGTTGATGATAGTCCGGAATAGTTCGAGATAAAGGCGAACGCCAGCACC
ATGCCGATGGAGTAGATAGGCAGAGCCAGTTCTTTCAGCGTGCTGCCGAAGGTGCTGATAGCGTCAGATGGTTTCATCTT
CAGCCAGACAATCGAGAGCAGGGCAGCAAACAGAATGGCGGTGCCGGTGGCAGAGAACCAGTCAAACTTAAACACGGCGG
CATACGCTGTCGCTTCGCTGACCACTGGCGGCATACGGGCAACCAGTTTATCGAGGTACGGCACCGGAATGTTGATCACC
CACTCATACAGCGCACCGCCTGAAGCGAACAGGGCTTTAAACGGCGGGATACTCCACAGCGTTACGGTGGCGGTCAGGAA
CAGGAACGGTGTCCAGGCGCGCAGCACCTGACCTGCCGTGTAACCTGTGTGAGCCAGCGTCATATCAACCTGTGACGCCC
CTAAGTCACCGAAGCGGAATACGCGAACTGGTTGCCAGCGTTTGAGGAACAGTGTCAGACAGAGCAGCGATACCAGCGAA
GAGATAATGTCTGGCAGTTCCGGCCCAATGAAGTTGGAACTGAGGTACTGAGCGATGGCAAACGAACCACCCGCAACCAC
GACCGCAGGCCAGGTTTCTTTGATACCGCGCCAGCCGTCCATAATCGCCATGATCCAGAACAGCACGATAATGGTCATAA
ACGGCAGCTGACGCCCCACCATCTGACCAATCTCAAAGCTGTCGATGCCTGTTACCTGGCCGGCAACCAGGATTGGAATG
CCCATCGCACCAAATGCCACTGGCGCGGTGTTAACAATCAGGCACAGCCCGGCGGCGTACAGTGGTTTAAAGCCCAGACC
GACCAGCAATGCGGCGGTAATTGCTACCGGTGCGCCAAAGCCTGCGGCTCCTTCAAGGAAAGCGCCGAAACAGAAACCGA
CGATCAGCATTTGCAGGCGCTGGTCAGGGGTTATCGAAAGAATAGACGAGCGAATGATGTCAAACTGCCCGGTTTTCACC
GAGATCTTATAGACGAACACCGCTGCAATAATGATCCACGCGATGGGCCACAACCCGTAGAAGAAGCCATAAACCACCGA
GGCCAGCGCGTTAGCGACCGGCATTTTATAGAACAGCAAAGCCACGGCAAGGGCGATTGCCACCGTCCATGAGGCGGCGA
CGTATCCTTTCAGTTTGAGCTTAATCAGCGCAAAGAAGAAAAACAGGATGGGAAGCGATGCTATCAGGCTGGAAAGCCAG
ATATTCCCGGCGGGATCGTAGTTTTGTTGCCAGAGATTCATTGCAGGTCTCCTGCAGTCCACACACGCCGTGTAATGAGT
CTGTTGCTCATCTCCTTGTCACACGTTGTGTAAAAGTGGCACTGCCAATTGTGTTGTGTAGGGATAATGACAATGGATGG
TTAACTAAATGTTATGCATTGGCAACATTGATGTGAGTTTTAATTGGGGAATTGTGAACCAGAGGTCAGATCAATGAAGA
ATTGGTAGGGCCAATCCTGGGAGAGAGGTAATGAAGAAAAGGGCAATTCCCATCAGAGAGTTGCCCTCAGATTGTTGATC
TGGTGCGCCTTATCTTGCCGGATGCGGCGTGAACGCCTTATCAGGCCTACAGGGTAGTGCTGAATCACCCCGTAGGCCTG
ATAAGCGTAGCGCATCAGGCAATGTGGCGTTTACCCATTCGTTAATGGATGATTACCACTGAATACCGGCACCGAGTGCG
GCGGAGTATTCACCCTGGCTATTGGTACTACCTTGTAATTTGTAGACCCAACGACCATTGGCGCTCACCATCGACACACC
TAAAGCAACAGCCGATTCACCGTTGTAAGTACCGCCACCAATAGACGCCATGCTGGCACCCGGCGTGTAAGCCTGCGGCA
GACCGGTCATCGCCATTGCAGAAGCGATACCACCACTCAGCTTGCTTTCAGTTTTGGACAGTTTGTTATCCATCTCAACC
ATGCGCTGATCGGTGTATTGCTTCGTTTCCTGCACACTTTGCTTCAACTGCGCGTAGTTCACCGCGTCGTTGTTATTCAC
GCCAGCAGAAACGTTGCTGATGCGAGTCGTACCGCCGTTACCACCACCGAGAGTGATGTTGCTGTAGTCGATAGAGCCAT
CAGCTTTGGTGTCGTAGCGAACGCCGCCTGCTTCAGAAGACTTCAGTTGCGAAACGTTAACCGCATCGGTGGCATTAACA
CCGGCAGCAACGTTGGTGATACGGCGCTGGTTGGTAGAAGAACCCACAGAGATGGTATTTTCTTCGTTGGCCACGGAGCC
TGTACCCAGCGCGACGCTGTTGTCAGCGGCAGCAATGGAACCAGAACCAATCGCAACACTGTCTTTACCCTGCGCGTTGG
CATCTACGCCATCGGTGTTGGTCTTGAAGTATTTGGTGCTACCGGTGGTTACGATATCGCCAATGCCGTTTTCTATATTG
GTCACGCGAGTATCCAGATTAGTGACCTGAGTGTTCAGGTTAGTAATGCTCTGGGTATTCTGGGAAACCTGCGCGTCCGT
TACTTTCAACTGACCCACGTTAACCGCATCGGTATCCGCCGACCCCGCTGCGACGTTGGTGATCTGACGTTGACCGTCTT
CACTGCCGACAGAGAACTCACCCACAGAGTTCTGCGGTGCATCCATGTTGTAGGCAGTGTAGTTGGTCTGCGCACCACGA
GTAGTCTGAGAACCATTACCCATAGCAATGCTGTCGGCATGATTTGCGCGTGCGTTAGAACCGATAGCAATACCGTTGAT
CGCATCAGCCAGAACTAAAGTGTTCAGGCCGATACCAATACCCGCATTACCATTAACGATGGTTTTCGCGCCCATTGCCA
GCGAGTCTTCACCGACTGCCAGTGAGTCTTCAGCCGTTGAGTTAGCGTGATAGTATTTGGTTGGTGTGGTTGCTACTGCA
CCAATGGCGTTTTGCAACTGGCGAACAGTAACAGCGTCATGGGCTTCAGAACCATCCGCGACGTTGATGATTTGACGATA
TTTACCATCATCACCGATCGACAATGCGCCAAGCAGTTCGCCATCCGTGGTGTCATAACCAATCACAACACCTTCTTCCG
ATACGCTCGTGTTACGAGAACCTTTAACAATCACGCGGCTGGAGACGGATTCGCTACCCAGCGCAATACTCGTCTCAACG
CCGCTGTAGCTGCCCTGACCGATGGCCACGCTACTATGGCCTTCGGCAAAAGAGTTATAACCCATGGCCACGCTGTTATC
GCCTTTGGCAACAGTGTTATACCCCACAGCGGTAGAGCCAATACCTGCTGCGCTGGCATCGGTGAAGGTTAAACCGGTGT
CATTGGTACGCACATAGTTAATACTTGCACCATTTTCTTCGATGTAGGTTTCACTGGTGTTACCGGCAAGCTGATTGATG
ACTTCGCTGTTCTGCTGGATCAGCATATTGGTGTTAAACAGCTGAGAACCGTTGATAGCATCGGTGCTACCTTCACCAAT
GTTACCATCAGCAACGTTTGTGATAATGCTGGCCTTGCCGTCATGACTGGCGTTGTAAGCCCCTTCGCCGTTATTGGCGG
TCGCATCCCACAGCAGCGCGTTCTCATCAAGCGCATCCAGAGCTTCACCGACGTTGTTGTAATCGGTATTTGCAATGGTG
TAAGTCGGTGCAGTGATAGTTCCGTCAGCGTTGACTTCTGCATCACCACCCAGCGCATCAGCGATGTACTTATTGGTGGT
ATAGAGTTGTGAGCCGTTAATCGCGTCGCTGCTGGTGGCAGAGATTGCACCATTTGCGACGTTAGTAATCTTACTGGCGG
TGTTATCTACCCCGCGACCGGCGCTGAATGCACCAGCACCGTCATTGGCTGTCGCATCCCAGAGCAGAGCATCACCGAGA
GAATCACTAAATGAAGTGTTAATTGCGGCCAGAGCATCACCGACGTTAGTGTAGTCAGTGCCGCCAATACTATAGGTTGG
CCCGGTTAATACACCTGTATCGCTAATATCAGCACCACCACCCAGATAGGACGTGAATGAATCAGCCAAACCATATAGTT
GTGAGCCATTTATGGCGTCAGTGCTGTCAGAGGAGACTATGCCAGCTTGTACGTTGCTGATTTTGTTGGTGGCGTTAGTA
CCGTGTGCAGCGGTGAATGCGCCTGCGGCGTCGTCCCATTTCAGGGCGTCTTCACCGAGATTATTCACCGTATCAGTCAG
GTTAGTGATATTGGTGGTGTTAGTGGCGATATTGGTGGTGTTGGTCGCCACGTTATCGTTGGTGATTTTGCTGGTAGCTT
CACTACCGTGTGCGGCACTGAATGCTGTGCCGTTCCACAACAGGGCATCCTGCTGCAGGTCGTACAATTGAGAGCCGTTT
ACTACATCGGTGCGGGTTGCAGAAACCGTACCTTTAGCAACATTAGTGATTTTGTTGGTGGCATTTGCACCGTGATTGGC
GCTGAACGCCCCCGCGGTTTTATTCCATTGTAGGGTATTATTGTCGATTCCTGACAGAGCATCACCCACGTTATTATAGG
TTCCGCTTCTCAACGCGTAGCTTACTGCGCTTATGCTGCCATCGTTGCCTACAGTAGTACAGTAGCGCCTCCCCCGAGCC
GTTTGGCGACTGAATCACTGATCGTATAAAGCTGTGAGCCGTTGATGGCATCGGCACTGGTGCAGCTTATGGCACCAGCA
GCCATATTAGCAATTTTGCGTTTTGTTGTGCTGTTGCCAACTGAAACCGTATTGCTTGCATCTGTGGTCGATCCTGCGCC
GATAGCGACAGAATTGTCGGTCGCTGCTGCAGCCCCTACACCGATAGCGACAGAATCATTGCCGTTTGCCCTGGACTGGC
TACCGAAAGCAAGGCTGTTGCTGCCACCAGCGGCACTACCCTCTCACAATGCGATGGCATTTTCTCCTGCAGACGAACTG
TTACTGCCCAACGCGATTGAGTTCACTTTGCTTGCAATGCTGCCTTGCCCCAGCGCAATCGCATTTTGTTCGCTGGCTTC
ACTTGTGTTACCTAATGCAATACTGGATTCGCCAGATGCCTGACTTGCGTTACCCAGGGCCGTCGAATTTATTCCCAGGG
CTTGCGCTTTGTTCCCAATCGCGATGGCGTTATCGTTCAAACTGCGACTGTCTGCCCCCATCGCAATAGCGTTCGCTGCG
CTGGCGAGTGATAGTCTGCCAAATGCAAAGCTGTCAAGAGCACTCGCATTTGCCTCTGAACCAAATGCCAGGCTATACAT
ACCTGCTGCTTTGGCCTTGTATCCAAGACTGGCGGCATAATCAGCGCCATCTTCGACTCTTGAGTCTCTGCCTATTGCGG
TGGAATAGAGACCTCCAGTATAGGTAGCTCCTCCCAGAGCAAGAGAAAAGTCCGCAATGGCATTCGCACCGCTACCGAAT
GCTGTGGATCGGTTTCCCGCAGCTATTGATTGTTGACCAATTGCAATTGCGCGATCGCCCGATGAGTGGCTTTTATAGCC
GAATGCAGTACTCCCCTCTCCATCTGCTAGTGCCTGTAGCCCTATCGCCATGGCCGTACCCGAAACAGTCTTTGTTGTTG
CCCTGGCACCTTCACCAATTGCAAGCCAGTTATCGCCTTCTATTGGAGATTCAATACCTTCCCCTCCATCAAGTGCCAAC
TCCGCACTCGCCCCAAATGACGACAACAACCCACCCGCAACCAGTGCAGAAATTAATAGCTTACTGCGCCCGCTTTTTTT
ACTACGGCTCTTCGCCGTTTCGCTGGCAACGGTGTAACTGCCTGTTGCCGGATTCCAGATAACTTTAAATATTTTATTCA
TTATTGATGCTCTCTATTCCTTGATATAAGCGCAGAAGCTGCATTTATTTTTTGTTTTTCCGCTGCCGGGTTTCAGCAGG
TTGAACAGTATTGAACTGGAGATTAGCCATATTGATGGACAACTTCAGATACTTCAGGTTATTAGGCGAGACGCCTTTTA
ATGTCAGATTAATGTCTTGCCATTGACCAGGCATTAATTGCAGAGTGGAATTCAGGGTGGTGTTGAAAAGTAATTGTTGC
CATTTCGCCAGTGCTTTGGCATCGGTGGGTTTTTCATTACCCCATGTTGCATGAAAGCCAATATTTGATACGGGAACACT
TAATAGGTTGACCAGCGAAATACGAATAAAACTGCCATTTTCAACCGCATCAATAGCCAGCATCCGGCCTGCCAAACCAA
CAGAGCCGTTATTTAAAATAAAGTATTGGGTTTGTGCCGGGTTAAATTCTGTAAAGACAAATTCGTCCTGTTTGTCTTTG
ACTGTCTTTACAATGTTGGCAAGTATTCTGGTGCTGTTTGTGATGTTATTTTGTTGTTTTTAAAATAGTTCTGCTCTGTG
TTTATATTGTTCTTGTTGTTTCTCAAGCGCCTCTATTTTACTTTTTTGCAACTCTTGCTGTTTGGCGAGATCATCGATCA
GACTCGCTTTTTCAATATAATCACAGTATTGTTAACACCTTTAAGAGTGTCTTTATGTTCATAGGATGAATTCCTTTTCA
TAACCCAATATGTTGATAATTACGCCATAAACATTCTTCTAGTGAATGTTTGTTTGTATATATATCCGCAATAAAAATTT
ATAAGATAATTGGTATTGCGAACGTTTTATTAAATAACAGATTATTTCAGTTTGTAGCGAATAATATGAGTCGCGCGGAT
TTTAATGAGCGGTATCAATCAATGTCAAATGTTTAGTGTCTTAGGCTAAGGAGCGCAGGGAGATTTTGCATTCATATAAA
TGATGCGTTGTGATGAAATTTGCTGTGTTTATGGGGGAATATAAATAATTACGCATCAGGATATGACGATTTATTTCTAT
AATTTATATATCACTTGTTGTTGCGCAACAAATTTTCAGATTTTAGCCTGCAAAAATACCTCAAACGCGTGGGGAAACTG
GAACAGTTTATGGTAAGAAAGACATCGTATTTGATGAGTAGTACATGCTCCTGCATGTGCTAGCAGGAGCGAGTAAATCG
TGAGAGGCTGTGATTACAGCGACGAGAAAGGAACTTAAAACGCAGTCTTTGAGAACCCTGTCATCTCTTGCAGGCCCATT
TCACGGCCCAGCGCGGTCATTGGGTGCACAACCACCAGTCCGCGAACACTTTTTTTCAGCTTGCCCATATCAGCCTGCTC
TTTTTTGGTGATTGCACGCTGGAACGGCATCTTCATCAGTTTCTGCGCTTCTTTGCTGAGTTTCTGGCTGTGAACTTCGC
GCAGTCGAGCAATTTCGGCTTCCAGAGTGGCTTTCTCTTTTTCCAGCTCGGCATATTTGTCTGCGGCTTCAACCAGCGAT
AGATCGGCCTGCTGGTGACGGATGGCGTCCAGACGATCGCTGAGACGTTTGATTTCGTTTTTTTCGACTTCTTTCATGTG
ATGACTTCTGATAAAGATAAATTTATAGCCTCTAGTATGCGCGACCAGGTGCTTTGTTCACAACTGATGGCATTGTAATA
GTTCCAGATTGTAACCATTAATGCGTTAAAAAATCACCCAATACATTGATTAGTTAAGAAATTTAAAGAAAAAAGATAGT
CAACAGAAGCAGGCGATTATTGAGGATTGAGCACGTTTTCCTTAATGTCATTTATACCGGGATCTAAACTAAAATTGGCG
GCCGCGCATTCCCGGCGCGGGGTAATACGGAGATATCATCATGGGCAAATTAGGTGAAAACGTTCCGCTTCTTATCGATA
AAGCCGTAGATTTCATGGCATCCAGCCAGGCGTTCCGGGAGTATCTGAAAAAACTACCTCCCCGTAACGCGATTCCGTCC
GGAATACCTGATGAAAGCGTGCCGTTATATCTACAACGTCTGGAGTATTATCGTCAGCTTTATCGTCCGAAACAGGTAGA
GGAGAAGTAAGCGAAAGTACTTACTTTTGAAAGGCTTTTTTTAAGCTGATTTTGGAAATCAGCTCTGTCAGTGAAAGGAC
CATTGTTGATCGCACAGCCTGTTGGTAACGCTGAATTTGCATTGCATACAAACTGGAGTCTGCTGGTTCAAACTGTGGCG
GCGGTGGTAACGCCGCCACGCAATGCAGTTCACCAAAGGGTCCAAGTATTTCGTCGTCGGTAAAAGCGTACTCGTTGCCG
TCGTGATTTAGCTCTTCACGCAATGCCATCAGCAGTTCCGCATCTTCGTATTCCTGGCGGTTAATGACGCCCAACCCGTA
AATGAGTTTTAAACGCACAGAAAGATCGCCCAGCGGACCATCGCCGTCGAGTAACGGTTCTACAGCATACTTCACCGCGT
AATCGTCTTTGCGGAATACCTGAAGCACCAGAAGATTTACCGCCTCGGTCAAAAGCTCGACGGCGGTGATCAGAAAGCTT
CGCACGGTTTTGCCAGCATTCAGACGCTCAAGCACACGGTTTTCAAAGGCCTGGGTTTGTTCCATTGTTGCCTGCATATC
TGACAATCTGTTATTCGGGCGCAGGGTATCCTGCGCCTGGTCCACCATTATTGCATTGCTTTATAAGCGGTTACCGCCTC
GGATACAACCTCGTTGTTGGCATCAAGACCGGAAATCTGTGCCAGCGCGGCTTGTGGGCCTTTGTCGGCAATCAGCGCTG
CCAGTTCCTGAGCCTGCGGATCATCTTCACTGCGGAAGTGCATTGCAGCGGCAATACCTTCAATCAGGTTTTTATGTGGC
AGACCATATTCCAGGGTTCCGAGCAGTGGTTTGATCAGACGGTCACCAGCACTCAGTTTACGCAGCGGCTGACGGCCTAC
GCGTTCTACATCATCTTTCAGGTATGGGTTCTCGAAACGACCGAGGATTTTCTGGATGTATGCCGCATGTTTGTCAGCAT
CAAAGCCGTAGCGCTTGATCAGTACCGCGCCGCTTTCTTCCATTGCCCCTTTTACCACCGCGCGGATTTTCTCGTCGAGA
ATTGCGTCACGAATGGTCTGATGACCGGCCAGTTTTCCGAGGTACGCGGTTATAGCATGACCTGTATTCAGGGTGAAGAG
TTTACGTTCGACAAATGCCATCAGATTGTCGGTTAATTCCATGCCAGGGATGTTTGGCAGCGTGCCTTTGAACTGCGTTT
TATCGACAATCCATTCGCTGAAGGTTTCTACCGTCACTTCCAGCGGATCGTTAGTTGCCGAAGCCGAAGGCGGTACGATG
CGGTCAACGGCGGAATCAACAAAGCCAACGTGTTCTTCTACCCACGCTTTGGCATCTTCCGGCAGGGCGTTCATCACATG
GCCTTTCAGCTGCGTGGTGCCGCGGACCATGTTTTCACAGGCGATGATGTTCAGTGGGGATTCATTACCTTGTTCTTTAC
GTTTCACCAGCCCTTTGGCGATGGCCGGAGCAATACGTTCCAGCACGACAGGGCCAACGGCGGTAGTGACTAAATCGACC
TGAGCAATCAGATCAACGACATCATCGCCAATGCTGCTGACGGCATCGACGCCAGAAACGGTATCTACCTGCTCGGTTTC
ACCAACCACATGAACCTGATAGCTATGACGGGCATTCAGGGCATCAAGTACCACCTGATTTACATCGGCAAACGTCAGTT
GGATACCCGCGTCCGCCAGCAGTTTACCGATAAAGCCACGACCGATATTACCTGCGCCAAAATGTAATGCTTTCATAGTA
TTAACCTTCATCAATGTTTTTACCCGAGAGGGCTGGGGTGAGGCTTTTCCCTCACCCAAACCCTCTCCGTGAGGAGAGGG
GCTTTTTGCCGGATGCGGCGTAAACGCCTTATCCGACCGACAAAACAAATTGTGCTTTATGTTGTAGGCCTGATAAGCGA
AGCGCATCAGGCAATTAGCCCCACCTTCTCCATGCGGAGAGGGTGGGTATGGATTACTTACGACCTGCCAGCAGTTCCAG
CACTTCATCCACACTGGTGGTGTGCGCCAGACGCTCGATAACTGACTCATCATCCAGTGCGTTGGTCAGGCTGGTGATCA
CCTGAATGTGCTCGTTGTTACGGGCAGCAATACCAATTACCAGACGGGCAATGTCATCTTCTTCTTCACCGAAGCGCACG
CCTTCCGGGTACTGGCAGAACACCACGCCCGTTTTCAGTACGCGATCTTTCGCTTCAACCGTACCGTGCGGCACCGCGAT
AGACTCACCCAGATAAGTCGGGGTCAGTTTTTCACGATCCAACATCGCCTGAACGTATTCCGGCTCAACGTAACCGCCTT
TCACTAGCTGCTCGCCAGCAAAACGAATCGCTTCTTCTTTGGTGGCCGCTTTGCGACCGAGGAAGATGTTCTCCGCGCCC
AGTTTGAACAGGTTAGCACTGGAATCGTCAAAGCTGTCTTTCAGACTGTCTTTCACTTTCACTTCGTTTTCAGTATGGCG
CTGGGCAGCAACCAGACGTTCGGTCAGGCTGGTGTACAGGCCGCTGTCGAGGAAGTTGGTCAGCGAAATATGCTGTGCCT
GCGGAACCTGGCGCATAGCGCGTTCGGTCAGGTCACGGTGAGTGATGACCAGGTCCACATCTGGCGGCAGGTTGTTGATC
GCGCTGTTAGTGACCGAAATCTGCGACAGACCTGCATCCTGAATTTTCTTACGCAGCACGCCTGCACCCATCGCACTGGA
ACCCATACCGGCATCACAGGCAACGATGATTTTACGGACGTGGCTCAGGTCGTTAGTCACATCGCCCGCAGACAGCGGAG
ATGCGCCTTTAGACTCAGCTTTCATTTCCTGAACGCGACGTGCAGCAGCTTCAATATCATCTTCTTCTTTCACTTTGCTG
GTTTTCAGCAGAATGGCAGAGACAACGAAGGAGACTGCCATCGCCGCACACACACCCGCGATGTTAGCGAAGTAAGCACC
TTTTGGCGTCATCGCCAGTACAGCAAGGATAGAACCCGGAGATGCCGGAGAAACCAGCCCACCGCCCAGGATAGTCAGCG
TGAACACGCCAGTCATACCGCCGAGGATAACGGCCAGAATCAGACGCGGATTCATCAGCACATACGGGAAGTAGATTTCG
TGGATACCCCCCAGGAAGTGGATGATTGCCGCACCGCCCGCAGACTGTTTAGCGCTACCACGACCAAAGAACATGTACGC
CAGCAGCACGCCCATACCTGGACCTGGGTTAGCTTCAATCAGGAAGAAGATGGATTTACCCAGTTCATGGGACTGCTGAA
TGCCCAGCGGCGAGAAGATACCGTGGTTAATGGCGTTGTTGAGGAACAGGATTTTCGCCGGTTCAACAAAGATAGACGCC
AGCGGCAGCATGTCATGGACAACCATGAAGTTAACGCCCGCAGCCAGCATTTTAGACAGGGCTTCAACAACCGGGCCAAT
GCCGAGAAATGCCAGAATAGCGAGGATCATCCCGATGATGCCTGCGGAGAAGTTATTCACCAGCATTTCAAAACCGGATT
TGATCTTACCGTCTACCCAGCGGTCGAAGTGCTTAATGCACCAGCCGCCCAGCGGACCTGCAATCATAGAGCCGAGGAAC
ATCGGCATATCTGCGCCGACGATAACGCCCATGGTGGTGATGGCACCGACTACGCCGCCACGTTCGCCGCCTACCAGCTT
ACCACCGGTATAACCGATCAGCAGCGGCAGGAGATAAGTGATCATCGGCCCGACCAGCTTCGCCAGCGTTTCGTTCGGTA
ACCACCCTGTTGGAATAAATAACGCGGTGATGATACCCCACGCGATAAACGCGCCGATATTTGGCATCACCATGTTGCTG
AGGAAACGACCAAAGCTTTGCACTTTGATCTTAATATCGGATGACATAAAAACACCCCTTCTTATGTTTGCTGTCGCGCA
GGCTGGAAGCCCGAGGTTTTTTGTTAATGTGGCGGCAGAGGTAGCCGGACCTTGTAGATACTGCGAAATCTGGCACTGAA
TCGGTTAACTGTCCAGTCGGCGGCCTTTTGTGTGACATCAGTCACATAAATGTAGGGGGTAGAGAGGTAATTGACGTGAT
ACTCATCACAAAATGCTTGTGTAAAAAAGCAACAAGGCGGCGATTTTCGCTAAAAATGGCATTTAAATGTGACTTATGTC
ACATTTTTATTTTGATGGTTTGTTGAATCTTTGTGATCTGAATCACAAGATATTTTCTTACGGCGTTCACCTGATGTGAT
CTACAGCATGTTATGCCTTCGTCATGAAATCGTTATGTAACTAAGCAACTCATCACCTCTTAAAATTATTCTTTGGTGTT
ATGGTGAGAATCGCGAACCCGGATTATTGTCAAAATATCAGCCTGACTCCCTTCTGGCTGCCAGCCAAAAAACAACACTG
ATAAACGTGAATCCGAGGCAGATATGTTTCTAAACTATTTCGCGTTGGGAGTGCTGATCTTCGTCTTTCTGGTGATTTTT
TATGGAATCATCGCGATACATGACATCCCTTATCTGATTGCCAAAAAGCGCAACCATCCCCATGCCGACGCTATTCATAC
GGCGGGCTGGGTGAGCCTGTTTACTCTGCATGTTATCTGGCCGTTTTTGTGGATCTGGGCGACGCTCTATCAACCGGAGC
GCGGCTGGGGCATGCAGTCGCATGTTGCGCCGCAAGGCGACGTGCCAGACCCGGAAATCGCCGCACTTTCTGACCGGATT
TCCCGGCTGGAGCACCAACTCGCCGCCGAGAAAAAGACTGACTATTCCACGTTCCCGGAGATCTAATAATGGATCTATTG
ATTGTTTTAACTTACGTGGCGCTGGCGTGGGCGGTCTTTAAAATCTTCCGCATTCCGGTGAATCAGTGGACGCTGGCGAC
GGCGGCGCTGGGAGGCGTGTTTCTGGTGAGTGGTTTGATTTTGTTGATGAACTACAACCACCCTTACACTTTTACCGCGC
AAAAGGCAGTGATAGCGATCCCCATCACGCCACAGGTGACGGGAATTGTTACTGAAGTCACCGACAAAAATAATCAGCTT
ATTCAGAAGGGCGAGGTGCTTTTTAAGCTCGACCCGGTTCGTTACCTGGCGCGAGTTGACAGGCTTCAGGCTGACCTGAT
GACGGCGACGCATAATATAAAGACGCTGCGCGCGCAGCTCACTGAAGCGCAGGCCAACACCACCCAGGTTTCAGCGGAGC
GCGACCGTCTGTTTAAAAATTATCAACGTTATCTGAAAGGCAGCCAGGCGGCGGTGAATCCGTTCTCGGAACGTGACATC
GACGATGCGCGGCAAAATTTCCTCGCGCAGGATGCGCTGGTGAAAGGCTCGGTGGCGGAGCAGGCGCAGATCCAGAGCCA
GCTCGACAGTATGGTTAACGGCGAGCAATCGCAGATTGTGAGCTTAAGAGCGCAACTTACAGAAGCAAAATATAACCTTG
AGCAGACCGTCATTCGCGCACCGAGCAATGGCTACGTCACTCAGGTACTGATCCGCCCAGGTACATACGCAGCTGCCTTG
CCGCTGCGTCCGGTGATGGTCTTCATCCCCGAGCAAAAACGGCAAGTTGTCGCCCAATTTCGGCAAAACTCGCTGTTACG
TCTGAAACCCGGCGATGATGCGGAAGTGGTGTTTAACGCGCTACCTGGGCAGGTGTTCCACGGCAAACTGACCAGCATTT
TACCTGTCGTGCCAGGCGGTTCTTATCAGGCGCAGGGGGTATTGCAATCATTAACGGTCGTGCCCGGCACGGACGGTGTG
CTGGGAACCATTGAACTGGACCCTAACGCTGATATCGATGCCTTACCCGACGGCATCTACGCCCAGGTGGCAGTTTACTC
CGACCATTTCAGCCATGTTTCGGTGATGCGGAAAGTGCTGCTAAGAATGACCAGTTGGATGCATTATCTTTATTTGGATC
ATTGAGACTTGTATCACCTGTGTTTTGCGCGAGCCTGAGCCATACTGATATTTTTCCTCGCACAAAGGACTCGGCATGAA
ACTCGTCGGTAGCTACACCAGCCCGTTTGTACGCAAACTTTCCATTCTGTTGTTAGAAAAGGGCATAACGTTCGAATTTA
TTAATGAACTGCCCTATAACGCGGATAACGGCGTGGCGCAATTTAACCCGTTAGGAAAAGTGCCGGTGCTGGTGACCGAA
GAGGGCGAATGCTGGTTTGATTCGCCGATCATCGCTGAATATATTGAATTAATGAATGTTGCTCCGGCGATGTTGCCGCG
TGATCCGCTGGAGTCGTTGCGGGTGCGCAAAATTGAGGCGCTGGCGGATGGCATTATGGATGCCGGGCTGGTATCGGTGC
GTGAACAGGCGCGTCCGGCGGCGCAGCAGTCTGAAGATGAATTGTTACGTCAGCGTGAGAAAATCAACCGCAGTCTGGAT
GTGCTGGAAGGATATCTGGTCGATGGCACACTCAAAACCGATACGGTCAATCTGGCGACTATCGCCATTGCCTGTGCCGT
CGGATATCTCAATTTCCGCCGCGTTGCGCCAGGCTGGTGTGTCGACCGCCCACACTTAGTCAAACTGGTCGAAAACCTGT
TTAGCCGCGAAAGTTTTGCTCGCACCGAACCGCCAAAGGCTTGATGCGCGATATGTCCTCCTGACCCATCTCACGTTACA
ATCCGTGGTTATGTTAAACGCCCTTCTCCGTGTGAGAGGGCCTTGATCAGCCAGGTTTCCTATGACAACCGAAACGCGTT
CCCTCTATAGTCAACTTCCGGCTATTGATCGCTTATTGCGCGATAGCTCCTTCCTTTCTTTGCGTGATACTTATGGTCAC
ACCCGCGTGGTGGAATTGCTGCGTCAGATGCTTGACGAAGCGCGAGAAATGATTCGTGACAGCCAGACGCTGCCCGCGTG
GTGTGAAAACTGGGCGCAAGAAGTCGATGCCCGGTTGACGAAAGAGGCGCAAAGCGCGCTGCGTCCGGTGATCAACCTGA
CGGGAACCGTGCTGCATACCAACCTTGGGCGAGCTTTACAGGCGGAAGCCGCGGTGGAAGCCGTTACGAAGGCTATGCGT
TCGCCAGTGACCCTCGAGTACGATCTGGACGACGCCGGACGCGGACATCGCGATCGGGCGCTGGCGCAGCTGCTGTGCCG
TATTACGGGGGCGGAAGATGCCTGTATCGTTAATAACAATGCGGCGGCGGTGTTATTGATGTTGGCGGCCACTGCCAGCG
GGAAAGAGGTGGTGGTTTCTCGCGGCGAACTGGTGGAGATTGGCGGCGCGTTTCGTATTCCCGATGTTATGCGTCAGGCA
GGATGCACCCTACATGAAGTAGGGACCACCAACCGTACGCACGCGAAGGATTATCGTCAGGCGGTGAATGAAAATACCGC
ACTGTTGATGAAAGTACATACCAGTAACTACAGCATTCAGGGGTTCACCAAAGCGATAGATGAAGCGGAACTGGTGGCGC
TCGGCAAAGAACTGGATGTTCCAGTGGTGACTGATTTAGGCAGTGGCTCGCTGGTCGATCTTAGCCAGTACGGTTTGCCG
AAAGAGCCAATGCCGCAGGAGTTGATTGCGGCGGGCGTCAGTCTGGTGAGCTTCTCCGGCGACAAGCTGTTAGGCGGGCC
GCAGGCAGGAATTATTGTTGGTAAAAAAGAGATGATCGCCCGCCTGCAAAGCCACCCGCTGAAGCGTGCATTACGCGCGG
ATAAAATGACCCTCGCGGCGCTGGAAGCCACGTTGCGTCTTTATTTACACCCTGAAGCTCTGAGTGAAAAATTACCGACC
CTGCGCCTGCTTACCCGCAGCGCAGAGGTCATTCAAATCCAGGCACAACGTTTACAGGCTCCCCTTGCCGCACATTACGG
CGCGGAGTTTGCGGTACAGGTTATGCCATGTCTTTCGCAGATTGGCAGTGGTTCGCTGCCGGTTGATCGCCTGCCGAGCG
CGGCATTAACGTTTACCCCCCATGATGGACGCGGTAGCCACCTTGAGTCATTAGCCGCCCGCTGGCGTGAATTGCCAGTG
CCGGTGATTGGTCGTATTTATGACGGACGATTGTGGCTGGATTTACGCTGCCTTGAAGATGAGCAACGGTTTTTGGAGAT
GTTGTTGAAATGATTATTGCGACTGCCGGACACGTTGACCACGGCAAAACAACCTTGTTGCAGGCGATTACGGGCGTAAA
TGCCGACCGTCTGCCGGAAGAAAAAAAGCGCGGCATGACCATCGACCTCGGCTATGCCTACTGGCCGCAGCCGGATGGTC
GCGTGCCTGGTTTTATCGACGTACCCGGTCATGAAAAGTTTCTTTCCAACATGCTGGCGGGCGTTGGTGGTATCGATCAC
GCGCTGTTGGTGGTGGCGTGCGATGACGGTGTGATGGCACAGACCCGTGAGCATCTGGCGATTTTGCAGCTGACCGGTAA
CCCGATGCTGACAGTGGCGCTGACCAAAGCCGATCGCGTGGACGAAGCGCGTGTTGATGAGGTTGAACGCCAGGTAAAGG
AGGTGCTGCGGGAATACGGTTTTGCTGAGGCAAAACTGTTTATCACCGCAGCAACCGAAGGTCGGGGAATTGATGCTCTG
CGCGAGCATCTGCTTCAGTTACCAGAACGTGAACACGCCAGCCAACATAGTTTCCGTCTCGCGATCGACCGTGCATTTAC
CGTAAAAGGTGCCGGGCTGGTCGTCACCGGTACGGCGTTAAGCGGGGAAGTGAAGGTAGGCGATTCACTATGGCTGACTG
GTGTAAATAAACCGATGCGCGTGCGTGCGCTGCATGCGCAAAATCAGCCAACAGAAACTGCCCATGCCGGTCAGCGTATC
GCGCTTAACATCGCGGGTGATGCGGAAAAAGAGCAGATTAACCGTGGTGACTGGCTGCTTGCTGATGCGCCGCCGGAGCC
TTTCACACGGGTGATTGTCGAGCTTCAAACCCATACACCGCTGACCCAGTGGCAGCCGCTGCATATTCACCACGCCGCCA
GCCACGTCACGGGACGCGTTTCGCTGCTGGAAGATAACCTTGCCGAGTTGGTGTTCGACACGCCGCTGTGGCTGGCAGAT
AACGATCGCTTAGTGCTACGCGATATCTCGGCCCGCAACACGCTGGCGGGGGCGCGCGTGGTGATGCTTAACCCGCCGCG
TCGCGGTAAACGTAAGCCGGAATATCTGCAATGGCTGGCGTCTCTTGCACAGGCGCAGAGCGATGCCGATGCGTTATCTG
TTCATCTGGAACGCGGAGCGGTTAACCTTGCTGATTTCGCCTGGGCGCGCCAGCTCAACGGCGAAGGGATGCGCGAACTG
CTGCAACAGCCTGGCTATATTCAGGCTGGTTATAGCTTGTTGAATGCGCCGGTTGCCGCTCGCTGGCAGCGGAAAATTCT
CGACACATTAGCGACTTATCATGAGCAATATCGCGATGAACCTGGTCCTGGGCGCGAACGTCTGCGACGTATGGCGTTGC
CAATGGAAGATGAAGCGCTGGTACTGTTGCTGATTGAAAAGATGCGCGAAAGCGGCGACATCCTCAGTCATCACGGCTGG
CTGCATCTGCCGGATCACAAAGCGGGCTTCAGTGCAGAGCAGCAGGCCATCTGGCAAAAAGCAGAGCCGCTGTTTGGTGA
CGAACCGTGGTGGGTGCGTGATCTGGCAAAAGAGACGGGAACCGACGAGCAGGCAATGCGCCTGACTCTACGCCAGGCGG
CGCAGCAGGGGATAATTACCGCGATCGTTAAAGATCGTTATTACCGTAACGATCGGATTGTCGAATTTGCCAATATGATC
CGCGATCTCGATCAGGAATGTGGTTCAACCTGCGCGGCGGATTTCCGCGATCGCTTAGGCGTAGGCCGCAAGCTGGCAAT
TCAGATTCTGGAATATTTTGACCGCATTGGCTTTACGCGGCGTCGTGGAAATGATCATTTATTGCGCGACGCATTATTAT
TTCCGGAAAAATAAGGAAATGATTAATTAATTTTTAAAATAAATTAATACAAAATTCTTATGATTTTAAAAAAGCACATT
GTTTAATGAATACAATGTGCTTTTTATTGGATTAATTTTGATAATCAATAATACTGATCATATTTTCAAATGAAAATCCT
CAGTAAGCTGCCCGCCCTTTTTTACACTTTCAGGAGTGTGTTATGGCAGCTTCAACCTTTTTTATTCCTTCCGTGAATGT
TATTGGTGCTGATTCATTGAATGATGCAATGAATATGATGGCAGATTATGGATTTACCCGTACCTTAATTGTCACCGACA
ACATATTAACGAAATTGGGTATGGCGGGTGATGTGCAAAAAGCACTGGAAGAACGCAATATTTTTAGCGTTATTTATGAT
GGCACCCAACCTAACCCCACCACGGAAAACGTCGCTGCAGGTTTGAAATTACTTAAAGAAAATAATTGCGATAGCGTGAT
TTCTTTAGGCGGTGGTTCTCCACACGACTGCGCAAAAGGTATTGCGCTGGTTGCAGCCAACGGCGGTGACATCCGCGATT
ATGAAGGCGTTGACCGCTCTGCAAAACCGCAGCTGCCGATGATCGCCATCAACACCACGGCGGGTACGGCCTCTGAAATG
ACCCGTTTCTGCATCATCACTGACGAAGCGCGTCACATCAAAATGGCGATTGTGGATAAACATGTAACTCCGCTGCTTTC
TGTCAATGACTCCTCTCTGATGATTGGTATGCCGAAGTCACTGACCGCCGCAACGGGTATGGATGCCTTAACGCACGCTA
TCGAAGCGTATGTTTCTATTGCCGCCACGCCGATCACTGACGCTTGTGCACTGAAAGCCGTGACCATGATTGCCGAAAAC
CTGCCGTTAGCCGTTGAAGATGGCAGTAATGCGAAAGCGCGTGAAGCAATGGCTTATGCCCAGTTCCTCGCCGGTATGGC
GTTCAATAATGCTTCTCTGGGTTATGTTCATGCGATGGCGCACCAGCTGGGCGGTTTCTACAACCTGCCACACGGTGTAT
GTAACGCCGTTTTGCTGCCGCATGTTCAGGTATTCAACAGCAAAGTCGCCGCTGCACGTCTGCGTGATTGTGCCGCTGCA
ATGGGCGTGAACGTGACAGGTAAAAACGACGCGGAAGGTGCTGAAGCCTGCATTAACGCCATCCGTGAACTGGCGAAGAA
AGTGGATATCCCGGCAGGCCTACGCGACCTGAACGTGAAAGAAGAAGATTTCGCGGTTCTGGCGACTAATGCCCTGAAAG
ATGCCTGCGGCTTTACTAACCCGATCCAGGCAACTCACGAAGAAATTGTGGCGATTTATCGCGCAGCGATGTAATCATCA
TTTCCACAACGGCTGGCGAGTTGTCAGCCGCTTTTTCAACTATCTCAAAACTTGCTTTTTTTGAGATAGTTTCTCTTTCC
TGCTATACACTATCTCAATATTGCGCTTTTTTGAGATAAGCACATGGCTATCAAATCACCTCCCGGACTTATTCCTTTAT
CACACTTATCGGGTGAGGAACTCCTGGCCCACCTGCGCTTTAACCGGGTTACCGATGAAAAAGGACGTTATCTGCCTTTT
GATGAGTTGCAGTACCGCATCAAAAAAGGAGAAAACGTCGATGTGGCGTGGACGCTTACCCGTCTGGCGCGCAACGCGGC
GATCCAACGAATTAATTATTGCAATGAAGCGGGTGAACAGGCCGGATTCAACATTACCCCGGTGATTGCAGAAGCGTGCG
AGCTTGTCGACAAACGTGCTACCGCGCTGGCGCTGAAAGATCAGACTGAACGGTTACGCGGGGCCGGAGCCGAGTTAAGC
CAGTTACGCCTGGAAGAGCCGATCACCAGCTCCCAGCTGGAAGGTGCGAATACTACAACGCTGGTGGCGAGAAAAATGCT
GGAAACAGGGCGGTCGCCACGCACTGAAGACGAGCATATGATTGCGGGAAATGCCCGGCTGATGGCGGAAATTCCGCACT
TACTCGCAGAACCGCTGACACCTGCGCTTATTCGCCAGTTACATGCCATTGGTATGGGTGGAATCAATGACGCGAAATAT
CGTCCGGGAGAATTTCGTGAAACAGATGATGTTGTGATCGCCGACTATGATGGCAATATAGTGCATCAACCGCCCGCTGC
GGCATTGTTACCGGAACGGCTGGAAAAAGTTTGCCAGTGGTTAAACAGCCATGAAGGGTATATTCATCCGTTGGTCCGTG
CCTGCATTCTGCATTTTATGCTGGCCCATGAACATCCGTTTCGGGATGGCAACGGGCGCACCAGTCGGGCGCTGTTTTAC
TGGTATATGCTGAAATCGGGCTACGATGTTTTTAAATATATTTCCATCAGCCGTTTGCTTCATGCAGCGCCAGTAAAATA
TGCCGCCAGCTACCAGTACACTGAATCAGATGGTATGGATCTGACTTATTTCCTTGAATATCAGGCGGGTGTCATTAAAC
GTGCTCTGCAAAACTGGCAGCAGCATATCGATGAAATTACACAACGAAGCGCAAAACTCGATAGTGTGCTGTTTAGCTCT
GGTGTGCTTAAACGCCTGAATCCGCGCCAGGTAACGCTCCTGAATGTGATGCTCGCCAATCCGGGGAAAGAGTACACAGT
TGCTGAAATTAGCGCGAGCTTGGGCGTCTCTGATAATACGGCTCGAGCTGATTTACGGACAATTGTTAAAGAAGGGTTTG
CGCAAGAGAAGAAAATTAATGACCAGCAAGCCGTGTACTTCGCGCATTATCCGCTGTAACCCTTGCCCGTAAATTCGTGA
TAGCCGTCGTAAAGCTGTCACCGACTGGCGAAGATTTCGCCAGTCACGTCTACCCTTGTTATACCTCACACCGCAAGGAG
ACGATCATGACCAATAATCCCCCTTCAGCACAGATTAAGCCCGGCGAGTATGGTTTCCCCCTCAAATTAAAAGCCCGCTA
CGACAACTTTATTGGCGGCGAATGGGTAGCCCCTGCCGACGGCGAGTATTACCAGAACCTGACGCCGGTGACCGGGCAGC
TACTGTGCGAAGTGGCGTCTTCGGGCAAACGAGACATCGATCTGGCGCTGGATGCTGCGCACAAAGTGAAAGATAAATGG
GCGCACACCTCGGTGCAGGATCGTGCGGCGATTCTGTTTAAGATTGCCGATCGAATGGAACAAAACCTTGAACTTTTAGC
GACGGCAGAAACCTGGGATAACGGTAAACCCATTCGCGAAACCAGTGCTGCCGACGTGCCGCTGGCGATTGATCATTTTC
GCTATTTTGCCTCGTGTATTCGGGCGCAGGAAGGTGGGATCAGTGAAATTGATAGCGAAACCGTGGCCTATCATTTCCAT
GAGCCGTTAGGCGTGGTGGGGCAGATTATCCCGTGGAACTTCCCGCTGCTGATGGCGAGCTGGAAAATGGCTCCCGCTCT
GGCGGCGGGCAACTGTGTGGTGCTGAAACCCGCACGTCTTACTCCGCTTTCTGTACTGCTGCTAATGGAAATCGTCGGTG
ATTTACTGCCGCCAGGGGTGGTGAACGTGGTCAATGGCGCAGGTGGGGAAATTGGCGAATATCTGGCGACCTCGAAACGC
ATCGCCAAAGTGGCGTTTACTGGCTCAACGGAAGTGGGCCAACAAATTATGCAATACGCCACGCAAAACATTATTCCGGT
GACGCTGGAGCTGGGCGGCAAATCGCCAAATATCTTCTTTGCTGATGTGATGGATGAAGAAGATGCCTTTTTCGATAAAG
CGCTGGAAGGCTTTGCACTGTTTGCCTTTAACCAGGGCGAAGTTTGCACCTGTCCAAGCCGTGCTTTAGTGCAGGAGTCT
ATCTACGAACGCTTTATGGAACGCGCTATCCGCCGTGTCGAAAGCATTCGCAGCGGTAACCCGCTCGACAGCGTGACGCA
AATGGGCGCGCAGGTTTCTCACGGGCAACTGGAAACCATCCTCAACTACATTGATATCGGTAAAAAAGAGGGCGCTGATG
TGCTCACCGGCGGGCGACGCAAGCTGCTGGAAGGCGAACTGAAAGACGGCTACTACCTCGAACCGACGATTCTGTTTGGT
CAGAACAATATGCGCGTGTTCCAGGAGGAGATTTTTGGCCCGGTGCTGGCGGTAACCACCTTCAAAACGATGGAAGAAGC
GCTGGAGCTGGCGAACGATACGCAATATGGTCTGGGCGCGGGCGTCTGGAGCCGCAACGGTAATCTGGCCTATAAGATGG
GGCGCGGCATTCAGGCCGGGCGCGTGTGGACCAACTGTTATCACGCTTACCCGGCACATGCGGCGTTTGGCGGCTACAAA
CAATCAGGCATTGGCCGCGAAACCCACAAAATGATGCTTGAGCATTACCAGCAAACCAAGTGCCTGCTGGTGAGCTACTC
GGATAAACCGTTGGGGCTGTTCTGATGTGAAAGGCTGCCCGGCGTGTATTGCCGGGCACTATCAGGTATGGCTACTGCCC
GTAATAGGCATTGGCCCCATGCTTACGCAGGTAGTGCTTATCCAGCAGTTCGTTTTGCATCGCAGGGCGCTGTGGCGCAA
GCTGGCGCGAGAACAGACCCATATAGGCGCACTCTTCCAGTACCACGGCGTTATGCACCGCATCGGCGGCATTTTTTCCC
CAGGCGAACGGGCCGTGAGAATGCACCAGTACCGCTGGGATTTGTGCCGGGTTCAACCCACGCTCTTCGAAGGTTTTAAT
GATCACTTCGCCGGTCTGGTATTCATACTCGCCGTTGATCTCTTCTGCGGTCATCAGGCGCGTGCAGGGGATGGCTCCGT
AAAAATAATCGGCGTGAGTAGTGCCCCAGGCGGGGAGATCAAGTCCGGCCTGCGACCAGATGGTGGCGTGGCGCGAGTGG
GTATGCACTATGCCGCCAATCTCCGCAAAGCGACGGTAAAGCGCCAGATGCGTTGGCGTGTCGGAAGAGGGCTTTTTGCT
GCCTTCCACCACCTTGCCGCTGGCTATCTCAACCACCACCATATCGTCGGCGGTCATTACCTCATACTCAACGCCGGAAG
GCTTAATCACCATCCATTGCCGCGTTTCGTCCATCGCGCTGACATTGCCCCAGGTGAACGTCACCAGATGATGAACGGGA
AGCGCCAGGTTTGCCGCCAGCACGTCAGCTTTCAGTTGCTCTAACATATAAATCCGGCCTCCTGCATACGCGCTTCAATC
CAGCGCCGCGCCTGAATAATCTCCAGCACCGGCTCTTTGGCTTTTTCGGTCCACATTTCAATCAGAAATGATCCGCGATA
GTTCAGCTCATGCAGCGTTTTGAAGATGCCAACAAAATCGACACAGCCTTCGCCAAACGGCACATCGCGGAACTGTCCGG
GGCTATGTTCGGTAACGGGTTGAGTGTCTTTCAGATGGATGGCGGCGATACGGTCGATACCCAGTTTCAGTTCGGCGGGA
ACATCATTGCCCCAGGCGCTGAGGTTGCCTACGTCTGGGTAAACGGTGAACCACGGTGACGCAAGCATTTCGTCCCACTT
TTTCCATTTGCTGATAGAGTTCATAAACGCGGTGTCCATAATCTCCACCGCCAGCATGACTTGTGATGCCGCTGCCTGTT
CAACCGCCCACGCAAGCCCTTCAGCAAACCGTTGCTGGGTGCCTTCGTCATGATCCTCGTAATAGACGTCGTAACCTGCC
AGTTGAATAGTACGAATGCCGAGATCGCGCGCCAGGCGAATCGCTTTACTCATAATCTCCCGCGCCCGCTGGCGCACGGC
GTCGTCCCGGCTACCAAAAGGAAAACGACGATGTGCGGACAGGCACATTGACGGAATAGCAACACCCGTTTCGATCATCG
CAGTGACCAGCGAAGCACGTTGTGCGGCGCTCCAGTCAAGACGTGACAACCGTTCGTCGGTTTCATCCACCGACATTTCG
ACAAAATCAAAACCACAGCTTTTTGCCAGCACCAGCCGCTCCGGCCAGGAGAGATCTTTCGCCAGCGCTTTTTCATAAAT
GCCTAACGGATGATTACGCACGCTTGCCTCCCCAGATGGAGTCGATTTGCGCATGAAAATCAGCGGCCACTTGCGCCGGA
TTTGCTGCGCCTGCCAGCGCCCGTCCGGCAATAAACGCTTTCACGCGGATCTCTTTAAACAGCGGCAGGTCAGCAGGGGT
AATCCCGCCAGTAATGGAAAGCTCAAGGCCGATATCGGAAAGCGCCTTCATGCGTGCCAGATCGGCCTCGCCCCACTGTT
GCCCGCTGGCCTGCGCGTCACGACCACGATGATAAATCGCCTGTCGTACACCAATACGATGCCAGTCACGGGCATCGTCC
AGCGTCCAGTTGCCGAATAGCTCGATCTGAATTTCACCGCCGCAGTTCTGTGCTATCGCGTGGCCTTTTTCCACCGTGGC
GAGCGGCGCGGCGCAGATGATGGTCATCCAGTTAGCGCCTGCGCCAAATGCCTGTTGCGCGAGCGTTTCACCCGCGTCGG
CGACCTTCCAGTCGGCAACGATGATTTTGTCAGGGCACTGTTCGCGCAAGGCTTTCACTGCGCCAAGCCCTTCGTTTAAA
CAGAGAATGGTGCCTGCTTCGACAATATCGACGCTGTCTTTTAACCGCGTCACGTCGCGCTGCGCGGCTTCAAGTGATGA
GTGGTCGAGGGCCAGTTGCAGAAGTGGTCGACTCATAATGTGTGCTCCTTGATGCGGGTGTGATAACCCTGAAGTGCGGC
AATGAGATGTTGATAGCGTTGGTATTTTTGTTGGTAAAGCTGATGCGCGGCCATATTCGGCAGCAGGGTGCGTACCGGGT
GCTGTAAGTCACGTTGGGCTTCGCTGAAATCGCGATAAACCCCGGTACCGACGCGGGCGGCAAGTGCCGCACCAAAGCAG
CCGGTTTCTTCCACCTGCGGCAGCTCGATACGCAGACCGCTGACGTCCGCCAGCATTTGCATCCAGACATCGGAGTGCGC
CGGGCCGCCAGTGACGCGCAGGGTGTGCACATCAGTAAAACGTTCGCGCATCCGGTTGAGATGGGTCATATGGCTGAACA
CCACCCCTTCATAGATAGCCTGTAAGAGGTGTGCACGGGTGTGAATGGCCTGCATCCCGTAGAAACCGCTGGTCATTTCG
AGTCCGGCGTTGCTGCCGTACAGGAACGGCAGGAAAAAGAGATCGCCACCGGCTTTCGGCAAACTGGCTACGGCCTGATT
AATCTCAGCAAATGAGATTTCTCCCCACTGTGCGGTAAACCATTCGAGATTGCCGGAAGAGGTGGGGCTGGCTTCGTGAA
CGATAAATTGACCATCGTTAACGTAGCGACCATAGACATACGGATGCGCTTCACCGTCACGTAAACCGTGGGTTATGCCG
CTGGTCACCGCCCAGGTCCCCATCACCGCATTGAGGGTGAATTCGTCTTCGAGCCCGGCGCAGAGTGCGGTGGAAACCAC
ATCAAACAGGCCGCCGACAACGGGGGTACCCGCTTTCAGACCGGTCAGTACGGCTGTCTGAGCGGTGATTTCCCCGCAGA
TTTCGGCAGATCCGACAACAGGCGGCAGGGCGTGATTGATTTCAGCAATCCCCAGCCAGTCGGTAAGGCACGGGTCATAT
TCCCCGCGACTCATGTTGTAGAGATTGGACTCAGAAATATTGCTCTCTTCGCAACCTTTGACGCCGGTTAAACACCAGCG
CAGGTAGTCGTGCGTCATCATCACGCAGCCAATTTGCGCGTAGCGTTCTGGTTCGTGCTCTTTCAGCCAGCGTAACAGCG
ACACCGGATGCCCGGTCCATAAGGTTTGTCGGGTCAGCGGATAGAGTTTTTCCGGGATGCCATCTTCCTGCCAGCGACGA
ACGATTTCCATCGCCCGGCGATCCGAGGACAAAATGGCGTTACCGAGCGGTTTGTCGTTTTTATCAAGTAGAAATAAGCC
CTTTCCCTGCGCGGAGATGCCGATACCGACAATTTGTTCCCCGCTGACGCCGGAATGGGTAAGCAGGGCGCGAATGACAG
CAGTGCAACATTGCCACAGTTCTGCCATGTCGCGCTCTGCCCAGCCTGGCTGTGGACTTAATGCGCACAGCGGCAGGCGC
TGCACGCCCGCCTCCCGGCCTTCTCGGTCATACAGCCCGGCTTTTAGCCAGCTACCGCCACAATCTAACCCCAGCCAGTA
TTGCGTCATGGTTTATTGCACCTCATCCACGGCTTTCAGCAGGTCAGCACCCTGGGGAACATCTTTAACAAACATGTCAC
GGACCTGAGTACCCAGCGCATCGCTAAAGGCTTTGCGGTCGAGATCGGTGATGACTTCCACGCCCGCTTCTTTCATACCG
TCGATGATTTTTTGCTGATCTTCGGCGACCAGTTTGCGCTGATAGCTACCCGCTTCCTGCGCAGATGAGATCAGTGCCTG
TTGGAACTCCGGGGTTAAGCCATCAAACTTCGCTTTGTTGATCACCACCAGAAGCGGCGAATAGGCGTGATGGGTCAGAG
AAAGGTACTTCTGCACTTCATAAAATTTTGCTGACCAGACGACGTTGATCGGGTGTTCCTGAGCGTCGATAGTGCGGGTT
TCCAGCCCGGTATAGACTTCGGCAAACGGCATCGGGATCGGGTTAGCGCCAAAAACTTTAAATGCGGCGATATTCATCGG
GCTATTGTTGGTGCGGATTTTTAGTCCTTTCAGGTCGGCAGGCGTTTTGACCGGTGCACGCGAGTTGGTGACATCGCGCC
AGCCGTTTTCCCAGTAAGCCAGCACTTTCAGCCCTTTACCTTCAAGGGAGACTTTCAGGTCATCACCGACTTTGCCGTCG
AGCGTTTTATGCGCGTGAGCGGTATCGCGGAACAGGAACGGGACATCGAGCAGGTTGATGACGGGCGAGAGTCCCGTAAA
GTTGTTAGAGCCAGACATCTCCATATCAATAGTGCCGCCACGCACGCCGCTGATCATCGCCTGCGCATTACCAAGGGTGC
TATCCGGGAACAGTTTTAATTTCAGTTCGCCTTTGGTTTTTTCCTGCAGTAATTCATTAAATTTTTTCGCCGCAATATGT
TGTGAATCGGTTTGTGAGGTTTCATAACCGAAACGTAATGATTGTGCCGCCAGAGAAGATGTGCTGAACGTCGCCACTCC
GGCAATTAATAAAGCGTAGGTTACAGAACGTAATTTCATTATGATTTCCTTTTAACTCATCCATTTAAGAGGAGCGGTAA
TGAGCTCCGGTATAAAAATAAATAATGCTAACAACATGAATAAAACCATGACGTAAGGCGCAACGCCTTTTACCGCATCG
TCAAATTTAAGTTTCGCCACGCCGCATACCACGTTAAGAACATTATCGACTGGAGGCGTAATCAGTGATATTGAACAGTT
GATAATAAACATGATGCCGAAATAGACCGGATCTATTCCCGCTTCTTTCACTAATGGCATTAATACTGGTGTAAGAATTA
ATACGGTAGGCGTTAAGTCCATGACCGTACTGATCACCATAATAGCGAGCATAATGACGATGAATAATAAGCGAGGCGAA
TCAACCAACGGTTGTAATAGCTCCGATACCATCATGGGTAATTCGGCGATCGTAATAAGCCATGCAGATACCGCAGCAGA
GGCCACCAGGAACATCACCACGGATGTGGTTTTTGCCGCGTTAATCAGCACATGATAAAGCGTGGAGAAGGTCATCTCGC
GATAGACCACCACCGAGACGAACAGAGCGTAGAAGGCGGCAACCGCGCCTGCTTCGGTCGGTGTAAATAACCCCGAACGG
AAACCGCCAATAATAATTATCGGTAAAAAGAGCGCCCAAATACCGGAAACTAAGGATTGCCAGACTTCTCGCAGTGAGGC
TTTCGGCTGACAAGGTAAATTCAGTCGTTTTGCCTGCCACCACCAGGTAACCATCAGCGTGACGCCCATCATGATGCCCG
GTGCGATGCCCGCCATAAACAGTTTGCTGATGGAGAGTCCGCTGGAGACGCCGAAGATAATGAGTGGTATGGAAGGCGGG
ATAATGGCCGCAATAATCCCGCCGGAACCGATAAGCCCGGCGGCGCGGTTTACCGGATAGTTGGCCTGGCGCATCATCGG
CACCAGCAGCGCGGCGACAGCTGCGGTATCAGCAACCGCAGAACCGGACAGGCTTGCCATGATCATCGCTGCCAGCACGC
CCACGTAACCCAGACCGCCTGGCCTGTGGCCTACCAGTTTCATTGGCAAGTCGACGATACGTTGCGACAGGCCGCCCGCG
TTCATGATCTCACCCGCCAGTACAAAGAAGGGGATGGCTAACAGGGAGAAGCTGTCTGCGCCATTTACCAACGTTTGTGC
CAGAATTTGCACATCAAAGATATCCATCCAGAACATCAATGAAATGCCGCACAGTAATAATGCCCAGGCGATGGGAACGC
CAATTGCGATAGCCCCTAACAAACTGACAATAAATATAAGGATTGTCATCGTCAGGCTCCTTGTTGGTTTCGGCTGGGGG
TATTTGTGAACTGCCGGTATAAGTGACGCAATTCCAGCAATGCGATAATCAGACTGGTGGGGATAGCGGCGGCGTACATT
AAGCCAACGGGGACGCCAAGAATGGGCGATAAGTTGCTCCAGTCTTGCGCTGTTTTTTCTATAGCGCCCCAGGCCAGCCC
CAGACACAGCAATAAAATGAGCGTATGGGTTAGCAGCGAAACACGTTGTTGATTAGCCGGTGAGAGTTTTTCGACTAAAA
AAGTAACCTGCACATGGCTGTTGTCCATATAAGCAACGATTGCGCCAATAAAGGTTAACCAGACAAATAAAAGTCGGGAT
AATTCATCAATCGATAATATACTTGTGTGGAATCCATATCGAAGAATGATATTAATAAAAATAATACAAGACAGTATTGC
GATGATGATCGCAAGAATGCCTTCGAGTATCCGTTTCATAACGAGTCCTTCTGGTTATGCAATATTTTTTATGCGCTAAT
GTTGTTAATATTCGTAATAATTATCAGAAAACGGCTAATTAGATATTCAAAGTGATATATAAATGGTTCTGTTTAACGAG
ATTCATTCAGAGAGTGAATGCCGTTGCGTAATATTTCGATGCGATGGTGCACATCAGCCGTCGCATTTATTTCCAGTAGC
TTGATCCCAGCAAAATGCAATGTTGACGATTCTGCTACATTAAATAACTCGCGAACATGATCTGTGGTCATCAGGCTTTC
TGCGCAGAATGGTGCAAACGGTGCGTGTAAATCCTGCCATTCGCCGTATGCCCCGTTTAGCGTCGTACCAGAGAACATTA
ACGCGCCGAGTTTTCCGGCTTGTTTCGCCATTTGGGTGTGGGTCAGCGGCAGCGTTGTATTGCGCCCTTCAATGGCAGAG
CGCGCCCAGTTGATACAGATGCTGATGTCATAATCGGTAATAACTTCCAGCACATTTTCTAAAGGCAAAAAGCCTTTTCG
GGGGGAAGAAGATGTCATGGCGTCGCAGTGTTCCAGCACCAGCTTGCACGGCCAGTCCCAACTGGCGATTTCTTTCAATG
AGCGGGCAAAAGCGTCCGTCGCTTGCATAACATTAGGATTCGTTGCTAACGGTGCAGCCTGGAGCTCCAGTGCGAGCACT
TTATTAGCCTGCAATGCGTTGATTTTATTGAACAGGTGGCGATAGTACGCCACGCAGGCCTGGCGCTGTTCTTCATCACT
GGAGGCGAGACCAAACCCGCTGTTTTCGCTGCGGCGACGCATGGTTTCCATCACTGCGGTGACGACAAATTTCCAGCTCT
CTGGCGTATGACGGAGTAACCATTGATCGCCCAGCGGGTGGAAGTTTTCCAGGCAAGGTTGTTCCAGCCCCAAAATGTCT
GGAGTCTCAGATAATTGTCGCCAGAAATCCTTCTCTTCCTCTTCACTTCTTTGGTGAAAAGAAGGTGCACAGGGATACGC
GCCGATAATATAACCGGCATTATTCGTTTTCATTATGTGCTCCAGTAATCATTTTTTATAAAGCAGCGAGGGCCACTTTA
ACCACGATCTTGCGTATTGCCGTAGTGGCATTTTTATTACATGCCGGGCGATGTACATCCTGCGGGAAGAAAATAGCATA
ACTACCCGGTATCATTTCTATAAATGATTCATGTTCACTATCGTGATAAAAAATAATATCGCGCTGCTCTAATAGTGATT
CGCTGACTTTATTGTTTCCCGTATCAATGGCAATGCCAATTTTCTCTTCACCCCACGCCAGAAACTGAATATCGATATAC
CGACGATGCACTTCCGGACGGTTTTCCACCGCTTCGCGTGTGGTTAAATCGATAATTTGCGCATAAATATTCTTGCCGTC
GATTTCGACAACGCCCGGCTCCAGGGCGTTGAAGTCGGTGGTGCGCAGAAAATCGAGCGCCTTTTCAATGGCGGCGGGCA
AACGGCACGGATTAGGCTGCGCGATATGTCCAAAAATCATGGCTTATCTCCTTATAACGCCTGGATTTTTGCCCACACGC
TGTCATCAACGGTAATACCGTTACGGCGGTTTTCTGCCAGCAGGGTAGTAAATTCGTGGCCGGGTAAACGAATAGACTGG
TTTTCGTCAGCACGCTCGGCACTGGTAACGTAATCCATAATGCGTTGCAGTTTGGCATCGCGGGTGGGACCGTCGATAAG
CTTGTCCACTTCAATGGCAATAAAAATTTGTGAAATGCCGTATTCGTCGCTGTTGTCCTCGGTGACTTCGGCAACCGATG
CGCCGTCAGAAAGGAGGGTAGCGATCATATCCAGCACAATCGACATGCCCGAACCTTTCCAGTAGCCCATCGGCAAAATG
CGGCGATTTTTCTCGATAACGCCAGGTTCTTTGGTCAAATTGCCCTCATCATCAAAGCCACCATCTACCGGGAGCTGACG
ACCAGCCAGGCGATTAACTTCTAACATGCCGTAAGAGAACATCGACATCGACATATCGACCATGGTGATCGGCGTGGAAG
GAATGGCGACGATCAGCGGGTTGGTGCCGATGCGACACTCTTTTGCGCCCCACGGTGGCATTACGGCGATGGAGTTGGTC
CAGCAAATGCCAATATAGCCTTTTTCCGCCGCCTGCCAGCCGTAGCTGCCGCCGCGCATCCAGTGGTTGGCATTACGTAG
TGCCACCAGACCAATACCGTGATCGGCAGCCAGTTCAATGGCGCGATCCATCATCTTTTTCGCTGTCAGGTTACCGATCG
AACGCTGGGCGTCCCACTGTTCAATTGCGCCGAGGCTGGTTATACGTTTGGGTTGGGCATCAGGAATGATATCGCCGTTT
TCCAGTTGTTGAATGAAACGAGGGAAACGATTAACGCCGTGAGAATAAACGCCGGATTCGGTGGTGCGGGCGAACATCTC
TGCACAGGCGTCAGCCGTTTCGCTGTCAACGCCGCGTGAAATTAAGACCCGATTAAAGGCTGCTTTTAACTGCTCAAATG
TCACTTTCATCCCAGGCTTCCTTGTTTTTTTGATCGCTTTTTTGGCTTAAAATTTCAATATGCGAAACTTGATTTCAAAT
ATATCGATCACTTTTTAACAAAGCAATCTGATTGATGAATTTCAAAAAACTTAAAAATCAAGTGGTTATAAATTATCTGT
CGAGATCGTGAACTACAGCACACTTTGCGCTACCATCAGGACGCGACAAAATGGGGAAAGAAGTGATGGGAAAAAAAGAG
AACGAGATGGCGCAGGAAAAAGAGCGCCCAGCCGGAAGCCAGAGTCTGTTTCGTGGGTTGATGCTGATTGAGATTTTGAG
CAACTATCCAAACGGTTGTCCGTTGGCGCATCTTTCGGAGCTGGCTGGTTTAAATAAGAGTACCGTCCATCGCTTATTGC
AGGGATTACAGTCCTGCGGCTATGTGACCACCGCGCCCGCCGCAGGGAGTTATCGCCTGACCACCAAATTTATTGCCGTC
GGGCAGAAGGCGCTATCTTCGCTGAATATCATTCATATCGCCGCTCCGCATCTTGAGGCTCTGAACATCGCCACTGGTGA
AACTATTAACTTCTCCAGCCGCGAAGACGATCACGCTATTTTGATTTATAAGCTGGAACCCACAACCGGGATGCTGCGAA
CCCGTGCCTATATAGGCCAGCATATGCCGCTCTACTGTTCCGCAATGGGCAAGATCTACATGGCGTTTGGTCACCCGGAC
TACGTGAAGTCATACTGGGAAAGCCATCAGCATGAGATCCAGCCGTTAACCCGCAATACCATTACCGAGCTGCCCGCGAT
GTTCGACGAACTGGCGCACATTCGTGAAAGTGGAGCGGCGATGGACAGAGAAGAAAACGAACTCGGCGTCTCCTGTATTG
CTGTTCCGGTGTTTGATATTCATGGGCGGGTGCCGTACGCCGTGTCGATTTCGCTTTCGACATCACGTCTGAAACAGGTG
GGAGAGAAAAATCTCCTGAAACCACTGCGTGAAACCGCGCAGGCTATTTCTAATGAACTGGGATTTACTGTCAGGGACGA
CCAGGGCGCGATTACATAACCCTTTGGACAAGTGCCAAAACTTTAACATTTCCTTCGTTGGATCAAAGCAGTAGGGACGC
GCGCTCTGGCACTCTGCTGTTTTAGTGCAAAGGAGTGATCATGAACCGGTTTATTATTGCGGATGCGACGAAATGTATCG
GTTGCCGTACCTGTGAAGTGGCTTGCGCAGTGTCGCATCAGGAGAATCAGGATTGCGCTGCGTTGTCACCAGACGAGTTT
ATTTCCCGTATTCGTGTCATTAAAGACCACAGCTGGACCACGGCAGTAGCCTGTCATCAGTGTGAAGATGCACCGTGCGC
GAATGTCTGCCCTGTTGACGCGATAAGCCGCGAACATGGGCATATTTTCGTTGAACAATCACGTTGCATTGGCTGTAAAA
GCTGTATGCTGGCTTGCCCGTTTGGTGCGATGGAGGTCGTTTCTTCGCGCAAAAAGGCGAGGGCGATTAAGTGCGATCTG
TGCTGGCATCGGGCGACGGGACCGGCCTGTGTTGAAGCCTGCCCGACAAAGGCGTTGCAGTGCGTGGATGTCGAGAAAGT
GCAGCGGCATCGGCTACGGCAGCAGCCTGTTTGAAACGTTTTTCCGGCGTTTCTCAACGCCGGAATAGTGCGCTTTGTTT
ATGCCGGATGCGGCTAAAACGCCTTATCCGGCCTACAAATTCTACCAAATTCAATATATTGCAGAAATCATGTAGGCCTG
ATAAGCGTAGCGCATCAGGCAATTTTTAGTGACTTTCAGCCCAGGCTCTTTCTATCTCTTCCGCCAGAATCTTCACACCC
GCCTCAATTTTCTCCGGCTCTGGTACGTAGTTCATGCGCATACATTGATGCGTATGCGGCCACGGTTTATCCAGTCCCGG
GAAGAAGTTGTGCCCCGGCACCATCAGCACGCCGCGTGCTTTCAGGCGCTGGTAGAGCTGCTCGGTCGTAATGGGCAAAT
CCTTAAACCATAGCCAGAGGAAAATGGCTCCTTCCGGTTTATGAATCAGGCAGCGATCTTCCGGTAAATAGCGGCGAATG
ATGGCGATAGTTTCCTGAACACGCTGGTAGTAAAACGGTTTGATGACTGTTTCAGACAGGCGCAGCAGATCGTTACGCTT
AATCATTTCACACATCATCGCCGGACCAATACCGCCAGGTGCCAGGCTGATAATGCCGTTCATATTGGTGATGGCGGTGA
TGATTTTTTCATTGGCGATGATAATGCCGCAGCGGGAGCCAGGTAGCCCCAGCTTGGAAAGACTCATGCACAGCACGATA
TTCGGATTCCATAGCGGGCGCGCTTCGCTGAAGATGATACCCGGGAACGGGACGCCATAAGCGTTATCAATCACCAGCGG
AATGCCGTGTTGATTCGCCAGCGCGTCAAGCTTCAGCAACTCTTCGTCAGTAATCACATTGCCTGTTGGATTCGTCGGCC
GGGAGACGCAAATCATCCCGGTTTCTTCGCCAATATGTAGATGCTCAAAATCGACGTGGTATTTAAACTGGCCTTCCGGC
AGCAGTTCAATATTCGGACGCGCAGAGACAAACAGATCTTCTTCCAGTCCGGCGTCAGCGTAGCCAATGTATTCCGGTGC
CAGCGGGAACAGCACTTTTTTGACCCGACCATCGGCACGGCGTCCGGCAAACAGATTAAATAAGTAGAAAAACGCGCTCT
GGCTGCCGTTTGTTAGTGCAATATTCTGTGGTTCGATATCCCAGCCCAACTTCTCGCGCAGCATTCCGGCAAGCAGTGTG
AGTAGCTCCGTTTTCCCCTGTGGACCGTCATAATTGCACAGTGCATCAGTCGCTTTGCCACTTTCCAGCATGTCGGTCAG
TAGCGTCTGGAAGTAGTTCTGCATTTCCGGGATCTGCGCCGGATTACCGCCGCCGAGCATAATCGCGCCAGGCGCGCGTA
AACCGTCGTTCAGATCTTCCATCAGCAGCGTAATGCCGGAGTGGCGGGTAAATTTGTCACCAAAAAGGGAGAATGTCATA
GCGGGATATCTGTCGAACTCTGTAGCAAGGAAGGTAACAATAACGCTACATTTGCTGGGGTGCAAATCGGTCTGTTGAAG
AGTGAGCGGTGCTTTATCCTGCAATGCTGATTAGGGCTGACATTTTATCCTGGTTGGCGGCTTCCCGAGGTACTGACGAA
CGGGAAGCCGGAAAAGTCACTGTTGCCCCGCCCAGATGACCAGCACTTTATCGTCGCCATGCTCACGAACAAAGCCGTAG
CCCTGCTTCAGCGAAAGTGTCGTTTGTTTGCCCGCGCCAATTGCGGGATGGCGGGCGCGGAACTGGCTGATTTTCTGCCA
GTGCGCGACGCTGGCGGCAGATTTACCGCTAACATCCTGCCAGTTCATATCCGAACGCGTACCTTGCAGCGGATCAGAAC
CGGTAGGACCGAACGGACGCGAGGATTCATCGCCATAAAAGATTTGTACCGCGCCTGGCGCTAATAATAATAACTCTGCT
GCTTTGTGGCCCCCTTCACGGAACAGGCGGGTATCATGCGACGAGAGGTAGCTCAACACGTTGAAATCCTGCAATTTCTC
CGCCATTTGCTGCCAGGTCGTATCCATCTGCGCCAGACAATCGACTGCTTTCGCCGCCTGCTCCTGATAATCGAAATTGA
TCATCGCATCGAAGCCGTGGCGATAGTAGTCACTTTGCATCACGCCGTGGCCCCAGGCTTCACCGGTCATCCAGAAAGGT
TTGTCATCTAATGCTTTGTCGGGGTTAGCTTTTTTCCATTCGCGAAGTGCAGCGCTGGCTTCGGTTTTCAGTTGCTGCCA
GGTGGGCAACTCAACATGTTTGGCGGTATCGACCCGAAAACCATCAATCCCATAGTCGCGGACCCACTGACTTAACCAGT
GGGTTAAGTAATCGCGAGGGGTAAAGCCGTCGATGTCTTTAGCGTGGGTATCCGTTTTGTTTTTATAGAACACTGGCAGA
CCAGAAGCGCTAGTTGATTCGGTTTTGATATCCGGCAAAAAGGCCAGCGACATAGTGAGATCGTCGAATCCAGGATTGTC
GTAATCGCCGATATCCGTTCTGATCCAGTTTTTTCCCCACCATTTATCCCAGCCTGTTTTGTCGCTGAAATTAATGTAAT
CGTTAAAGCTATGCCAGGTTTGCCCGGCGGCAGGTTTCCAGTCGCTCCAGCGTTCACCCAGCGTTTTTTTCAGCTCGTCA
CCAGAAAGATATAACGCGCCAAACTGATACTCCTGCATATCCGCCAGCGTGGCATAGCCAGTGTGGTTCATCACGACATC
AAAGAGAATACGAATACCGCGCTGATGCGCGCTATCAACCAGCGTCCGTAGATCGGCTTTACTGCCCATATTGGCATCAA
GATTCGTCCAGTCCTGTGTGTAATAACCATGATAGGCATAATGCGGGAAATCACCTTTTGTACCGCCGCCGACCCAGCCG
TGAATTTGCTCAAATGGGGCGCTTATCCATAAAGCATTAACGCCCAACTGCTGGAGATAATCCAGTTTGTTGGTCAGGCC
GCGTAAATCGCCGCCGTGAAAAGTGCCAATTTCCGCCATACCGTCTTTATGACGTCCGTAACTCTGGTCATTATTGGGAT
CGCCGTTTTCGAAACGATCTGTCAGCACAAAGTGAACCGTGGCGTTATGCCAGTCGAAAGGGGCAGAGGCGTCAGTTTCG
GCTCGTTCCAGCAGGAGTAAACCGTTGCTGCTGGCAGCGGGTTGTAACGTTATTTGACCGTTCTTCACTATCGCAATTTG
CTGGCTGTAATAATCCCGGACTGCGACTCCCTCCGGAAAAGTGGCGCTGACATCCAGTGTGAGCGGTAATCCATCCCATT
TCGGGCATTCACGGACCAGGCTTGCTACCGGTTCGACGGCGTTCTGGATGGAAATCATCAATGTTGGCGTACCGGAGCGG
GTGTCTAGTTGCAGCGTATATTCGCCGTCCCTGAACAATCGCCATTGAGGTGGCGTGTTGCTACAAGGTTGCAGGGAAAG
CATCTGATTGAGTTTTATCGCATCCGCAGGCTGCCAGCACTGTTGGTCAAAATTTAGCGTTAGTGGACGCGTACCTTTGG
GCAACTGCGCGTGGCTGACAAATGTTCCCGTCCCCTGTTCGCTAAAGGCAGGGAACCCCGGAGAAGTCCAGCTGGCGGCA
ACGGCGAAGCCAGGAAGGAGTGTCAGAAAACAGACGGCGAGTTTCATGGCGGATGAGTCCTTATTGCTGCGATTTCAGAC
AGTTTGCCAGCGATAAGCCAGACAAAACTCATCCCTGAGCGGTAAGTCCACAGGATGAGAAGCAAGGGTGAGCGATCGCG
CGCAAAAAACGGCTGAATTTTGCGATAAACCCCACATTTTCTGCGATTTAGCGCCAATCTGAATCGTTAACTCGTGACAT
AGTTTCAGATTTGGACTATTCCTTGGGGTGCTCTTGACAGCTATTTTTGATATGATTTGAGATTCAACTCTCAAATTTGT
AAAAAATATAAGGTGTTGGAATGATTAAATCCGACCAGGAGACCTGATGATTTTGACTCCCATACGACGATATGGGGCGA
TGATTCTTATGTTACTCACTCTGGTGTTTTCGAGTGAGGTGTTAGCGAAGACGCACACAACAACAGCGAGTCAAAAGTCC
CACTTAACTAAAGCTAGTAATAAACAGGTAAGCAGTAAACAAGAGTATTCTCGCAATAGTGCAAAGAGTAGTTCACTTCC
TGATTTGCGAAAATACCCTTCCGGAACACCAAGGAAAAAGGCGTTTCTCCGGACTGTAATGCCTTACATTACCAGCCAAA
ATGCGGCCATTACTGCGGAACGTAACTGGCTGATTTCAAAACAGTATCAGGGCCAATGGTCACCTGCTGAGCGTGCGCGT
CTGAAAGACATCGCCAAACGCTACAAGGTGAAGTGGTCTGGTAATACGCGAAAAATCCCGTGGAATACCTTGCTTGAACG
CGTAGACATTATCCCTACCAGTATGGTGGCGACGATGGCTGCAGCAGAAAGCGGTTGGGGAACGTCAAAGCTGGCGCGCA
ACAACAACAACCTGTTCGGCATGAAATGCATGAAAGGACGTTGTACCAATGCGCCGGGTAAAGTGAAAGGGTACTCACAG
TTTAGTTCTGTCAAAGAATCGGTGAGCGCCTATGTCACTAACCTCAATACGCACCCGGCTTACTCTTCGTTCCGTAAATC
GCGTGCACAACTGCGTAAAGCGGATCAGGAAGTGACTGCCACAGCGATGATTCACAAGCTGAAGGGCTACTCGACCAAAG
GGAAGAGTTATAACAACTACCTGTTCGCAATGTACCAGGATAACCAACGGTTAATCGCGGCGCATATGTAATTGCATTTC
CTCGAGCCTTATCCGACTTGTCGGGCGGATAAGGCTTTTGCTCGTATCAGGTGGTTGTGCTGAGTTACCTGATGCGACGC
CGATAATTCTCATCATCGCTACAACATGACCTCGCTATTTACATCGCGATACTCTTTTGGCGTTGTGTCATATGCTTTTT
TAAAAACAGAGTAGAAATATTGCAGCGATGGATAACCGCACATTTGCGATATCTCGTTAATTGACAAGGTGGTTGAAATC
AGCAGACTGCGCGCTTTCTCCAGCTTTTCGGCATGAATCATGGCGTGAATGGTTTCGCCCACCTCTTCTTTAAAACGCTT
CTCAAGATTGGAGCGTGATATGCCCACCGCATCCAGTACCTGATCCACTTTAATCCCTTTACAGGCGTGATTACGAATGT
AATGCATGGCCTGAATAACGGCGGGATCGGTCAGCGAGCGGTAATCTGTTGAGCGCCGTTCAATGACGCGAACTGGTGGG
ACCAAAATCCGCTGTAGCGGCATTTCTTCTTTATCTAATAATCGATGCAACAGTTTTGCCGCCTGATAGCCCATTTGCCG
TGCGCCCTGAGCGACCGAAGAAAGGGCGACACGCGACAGATAGCGGGTCAGTTCTTCGTTATCGATGCCAATCACGCATA
ATTTTTCCGGTACGGGAATGTGTAGATGTTCACATACTTGCAGAATATGCCGCGCCCGGGCGTCAGTAACGGCAATAATC
CCGGTTTGCGGTGGCAGCGTTTGTAGCCAGTCTGCCAGCCGATTTTGCGCGTGTTGCCAGTTCTCTGGCGCGGTTTCTAA
CCCCTGATAAACCACTCCGCGATACTTTTCTTCGGCGACAAGCTGACGAAATGCATATTCGCGTTCAGTGGCCCAACGTT
TACCGCTTGATTCCGGAAGACCATAAAAAGCAAAGCGGTTAACGCCTTTCTCTTTTAAATGCAAAAATGCGCTTTCAACC
AGCGCATAGTTATCGGTGGCAATGTAATGAACGGGTGGGTAACTTTCGGCAAGGTGATACGAGCCACCAACCCCAACAAT
GGGGACGTCGACATCAGCCAGCGCTTGCTCGATTTGTTTGTCGTCGAAGTCGGCAATGACGCCATCTCCTAACCAGTCCT
TGATTTTATCAATGCGGGCGCGGAAATCTTCTTCAATGAAAATATCCCATTCCGATTGTGACGCCTGTAAATATTCCCCT
ACGCCTTCTACTACCTGCCGGTCATAGGCTTTATTGGCATTGAACAGTAATGTGATGCGGTGACGTTTAGTAAACATGGT
TCTTTTCCTGCTGAATCATGCAAAAACTCAAAACCGGTAATACGTTACCGGCTTTGAGAAAATTTTTATCAAAATCAAGA
ACGGCGTTTGGTTGCGGAGTCCATCCATACTGCCAGCAACAGAATCGCACCTTTAACGATATACTGCCAGAAGGTCGGTA
CATCCATCATACTCATGCCGTTATCCAGTGAAGCCATGATGAATGCCCCCATTACTGCTCCAGCCACGCTCCCGACGCCG
CCTGCCAGACTGGTGCCGCCAATCACACATGCTGCAATTGCGTCCAGCTCGGCGATATTTCCCGCAGAAGGTGAACCAGC
GCCGAGTCGAGAACTGAGGATTAATCCGGCGATGGCTACCATTAATCCGTTAATAGCGAACACGGCAAGTTTGGTGCGTT
CAACGTTAATCCCGGAGAGACGTGCCGCTTCCAGATTGCCGCCGATGGCATAAATGCGTCGTCCAAATGCCGTCCGCGTT
GCCATAAACATTCCGCCGAGTAACAGCAACGTCAGCAGCAGAACAGGAGTGGGAACACCACGGTAATCATTCAACAGCCA
GATTGCGCCTAATACGATGATAGCGGTTAAAGCCTGGCGACCGACTACTGCGGTAGAGGCCGGAGACTGCAAACCCAAAG
CCTGACGGCGCATTCTTCCGCGCCATTGCCAGCCAACAAAAGCCATTAAGCCAAGCGCGCCAATGATGAAGCCGGTGCTG
GCAGGTAGATAGCTTTGCCCAATTTGTGACATCGCGGCGCTGGTGGGGGAAACAGTCGTGCCGTTGGTGATGCCAATGAG
TATGCCACGAAATGCCAACATGCCCGCGAGGGTGACAATAAATGAAGGGACTTTGCGGTACGCGACCCACCATCCGTTCC
AGGCTCCGAGAAGCAGTCCCAGAACCAACGTCACAATGATGGTAAGTGGCAAAGGCCAGCCTAGCCAGACGTCACAAATC
GCCGCGACGCCACCTAACAGCCCCATCATTGAGCCGACGGAAAGGTCGATTTCAGCAGAAATTATGACGAACACCATTCC
TACCGCGAGGATGCCGGTAATCGCGGTTTGGCGTAACAGGTTGGAGACGTTACGGGCGCTTAAGTAGGCACCATCGGTGG
TCCAGGTAAAGAACAGCATGATTGCGATGATAGCTGCAATCATCACGAAGACCTGCAAATTCAGTGATTTCAGCCCGGAA
AAGCCACCGGATGTCGGTACGGCTAATTTCACTTCAGACGGATTGCTTTTCGACATGATGTTCGCTCCTCAATGCGGCTT
CCATCACCTGCTCCTGAGTCAGGTTATGATTTATCAGGTTGGCTTTTAGTTTCCCTTCATGCATCACCAGTACACGATCG
CTAAGGCCGAGCACTTCAGGTAATTCGGAAGAGATGACAATAACGGCAATACCCTGCTGGACGAGTTGGTTAATTAATTT
GTAGATCTCGTATTTCGCGCCAATATCGATACCCCTGGTGGGTTCATCAAGAATGAGAATGCGCGGGTTAAGTAACAGAC
AGCGAGCGAGGATCGCTTTTTGTTGATTGCCGCCGCTCAAACGTCCAATAGCAAGGTCGGGGGACGACGTTTTAACTTTG
AGTTGCTGGATTGATTCCAGAATACATTTTTGCTCTGCCGCGTCATCAAGCTGGCTAATACTACCGGTAAATTTTTTGAG
TGCGGCGAGGGTAATATTTTTACCAACCGCCATTACCGGAACGATGCCGTCGCGCTTTCTGTCTTCGGGTACCATCGCAA
TCCCCTGGGCGATGGCTTGCTGACAGTTACGAATATCTACCTGTTTGCCGTCAATATAAATTTTCCCTTCCCATTGTCCG
GGCCACACACCAAACAGGCACTGAATAGTCTCGGTACGTCCGGCACCAACGAGTCCGGCGATACCCAGTATTTCGCCACG
TTTCAGGGAAAACGAGACATCATTAACTCGTTTAATATGACGATTAACCGGATGCCATGCCGTCAGATGTTCAATACGTA
ATATTTCATCTCCGGTGGTATGTGGTTCATTAGGGTAAAGCGCGGTTAACTCTCGCCCGACCATCATGGTGATAATATCG
TCTTCACTCATTCCAGCAGCATCACGCGTGCCAATGTGCTGACCGTCGCGAATAACGCAAATCGTATCGGAAATCGCTTT
GACTTCGTTGAGTTTGTGCGAAATATAAATACAGGCGATACCGTGCTGTTGTAGATCGCGAATAATATCCAGTAAAACCG
ACGTTTCCTGCTCAGTTAATGAGGCTGTCGGCTCATCGAGAATTAACAAACGCACCTGTTTATTAAGTGCCTTGGCAATT
TCAACCAGTTGTTGTTGCCCAAGTCCTAAATCGCCAACGCGGGTATCAGGTGAAATGGATAAACTGACCTGTGCGAGCAG
CTTCTGACAGCGTAGCGTCATCAGGTCATAATCCATAATGCCATTATGGGTTATTTCGTTACCCAGGAAGATATTTTCCA
GCACGGTCAGTTCTTTCACCAGCGCCAATTCCTGGTGAATAATGGCGATACCTTTGCGTTCGGTATCGCGGATGTGACTC
GCCTGAATCTCTTCTCCCGCAAAAATAATTTCGCCTTCGTAGGAACCATGGGGATAAATACCACACAGCACTTTCATCAG
CGTTGATTTACCTGACCCATTTTCCCCACAGAGTGAGACGATTTCGCCAGCATTCAACCGCAAGCTGACGTTATCAATCG
CCTTCACACTGCCGAAGGTTTTGGTAATGTTCTTCATTTCAAGTAGATAAGGCATAACGACTCCACCTAAGCCAATTAAT
TCACGCGGCATGGAGAGAAATCACGCCCCCGCTCCGCGCCGGGGCGTAACGCTTACAGCTCGCTCTCTTTGTGGAATCCG
TCTTTAACTACCGTATCTTTGATGTTGTTTTTATTCACATCGATCGGTGTCAGCAGGCGGGAGGGAACATCTTTCAGGCC
ATTATTCAGTGTGGTATCCGCTTTTGGCTCCTGACCATTGCCCAACTCAACGGCAATTTCTGCGGCAGTATTTGCCAACA
ATGTAATAGGTTTATACACCGTCATAGTTTGCGTACCGGCAGCAATACGTTTAATACCTGCAAGATCCGCATCCTGGCCG
GAAATTGCTACTTTCCCTGATAAACCTTGCGCGCTTAATGCCTGAATTGCCCCTCCTGCGGTGGCATCATTTGAGGCAAC
TACAGCATCAATTTTGTTATTATTGGCGGTTAGCGCGTTTTCCATAATTTTCAATGCGTTTTCCGGTAACCAGCCATCAA
CCCATTGGTCACCAACGACTTTAATTTTTCCGGAATCAACATAAGGTTTTAATACTTTCATTTGCCCGGCGCGGAACAGC
TTGGCGTTGTTATCTACCGGCGAGCCGCCCATCAGGAAGTAATTACCTTGCGGAACAATATCGACCAGGGCTTTTGCCTG
CAGTTCACCGACTTTTTCGTTATCGAAAGAAATATAAAAATCGATATCCGCATCGTTAATCATACGGTCGTAAGCTAATA
CTTTAATACCTTCTTGTTTGGCTTCTTTTACAACGTTACTTAATACCTGACCGTTATAAGGAATAATGACAAGAACATCG
ACACCCCGGTTAATCATGTTTTCAATCTGCGACATTTGTGTTTCTTCATTGCCATTAGCAGACTGTACAAATACTTTCGC
GCCGAGAGATTCTGCTTTTTTCACAAAAATATCTCGATCTTTTTGCCAGCGTTCAAGACGGAGATCATCAATCGCCATAC
CTATTTTGACTTCTTTGGCGTGTGCCGCAACGTTGGTAAGCAGAAGTGAGGTGCAAAGGGTGAGTAGAATGTTCTTTATT
TTCATGGTGTAGGGCCTTCTGTAGTTAGAGGACAGCTTTAATAAGTAACAATCACCGCGATAAACGTAACCAATTTTTAG
CAACTAAACAGGGGAAAACAATTACAGATTTTTATCTTTCGATTACGATTTTTGGTTTATTTCTTGATTTATGACCGAGA
TCTTACTTTTGTTGCGCAATTGTACTTATTGCATTTTTCTCTTCGAGGAATTACCCAGTTTCATCATCCTATTTTATTTT
GCGAGCGAGCGCACACTTGTGAATTATCTCAATAGCAGTGTGAAATAACATAATTGAGCAACTGAAAGGGAGTGCCCAAT
ATTACGACATCATCCATCACCCGCGGCATTACCTGATTATGGAGTTCAATATGCAAGCCTATTTTGACCAGCTCGATCGC
GTTCGTTATGAAGGCTCAAAATCCTCAAACCCGTTAGCATTCCGTCACTACAATCCCGACGAACTGGTGTTGGGCAAGCG
TATGGAAGAGCACTTGCGTTTTGCCGCCTGCTACTGGCACACCTTCTGCTGGAACGGGGCGGATATGTTTGGTGTGGGGG
CGTTTAATCGTCCGTGGCAGCAGCCTGGTGAGGCACTGGCGTTGGCGAAGCGTAAAGCAGATGTCGCATTTGAGTTTTTC
CACAAGTTACATGTGCCATTTTATTGCTTCCACGATGTGGATGTTTCCCCTGAGGGCGCGTCGTTAAAAGAGTACATCAA
TAATTTTGCGCAAATGGTTGATGTCCTGGCAGGCAAGCAAGAAGAGAGCGGCGTGAAGCTGCTGTGGGGAACTGCTAACT
GCTTTACAAACCCTCGCTATGGCGCGGGTGCGGCGACGAACCCAGATCCTGAAGTCTTCAGTTGGGCGGCAACGCAAGTT
GTTACAGCGATGGAAGCAACCCATAAATTGGGCGGTGAAAACTATGTCCTGTGGGGTGGTCGTGAAGGTTACGAAACGCT
GTTAAATACCGACTTGCGCCAGGAGCGTGAACAGCTGGGCCGCTTTATGCAGATGGTGGTTGAGCATAAACATAAAATCG
GTTTCCAGGGCACGTTGCTTATCGAACCGAAACCGCAAGAACCGACCAAACATCAATATGATTACGATGCTGCGACGGTC
TATGGCTTCCTGAAACAGTTTGGTCTGGAAAAAGAGATTAAACTGAATATTGAAGCTAACCACGCGACGCTGGCAGGTCA
CTCTTTCCATCATGAAATAGCCACCGCCATTGCGCTTGGCCTGTTCGGTTCTGTCGACGCCAACCGTGGCGATGCGCAAC
TGGGCTGGGACACCGACCAGTTCCCGAACAGTGTGGAAGAGAATGCGCTGGTGATGTATGAAATTCTCAAAGCAGGCGGT
TTCACCACCGGTGGTCTGAACTTCGATGCCAAAGTACGTCGTCAAAGTACTGATAAATATGATCTGTTTTACGGTCATAT
CGGCGCGATGGATACGATGGCGTTGGCGCTGAAAATTGCAGCGCGCATGATTGAAGATGGCGAGCTGGATAAACGCATCG
CGCAGCGTTATTCCGGCTGGAATAGTGAATTAGGCCAGCAAATCCTGAAAGGCCAAATGTCACTGGCAGATTTAGCCAAA
TATGCTCAGGAACATAATTTGTCTCCGGTGCATCAGAGTGGTCGCCAGGAGCAACTGGAAAATCTGGTAAATCATTATCT
GTTCGACAAATAACGGCTAACTGTGCAGTCCGTTGGCCCGGTTATCAGTAGCGATACCGGGCATTTTTTTAAGGAACGAT
CGATATGTATATCGGGATAGATCTTGGCACCTCGGGCGTAAAAGTTATTTTGCTCAACGAGCAGGGTGAGGTGGTTGCTG
CGCAAACGGAAAAGCTGACCGTTTCGCGCCCGCATCCACTCTGGTCGGAACAAGACCCGGAACAGTGGTGGCAGGCAACT
GATCGCGCAATGAAAGCTCTGGGCGTTCAGCATTCTCTGCAAGACGTTAAAGCATTAGGTATTGCCGGACAGATGCACGG
TGCAACCTTACTGGATGCTCAGCAACGGGTGTTACGCCCTGCCATTTTGTGGAACGACGGGCGCTGTGCGCAAGAGTGCA
CTTTGCTGGAAGCGCGAGTTCCGCAATCGCGGGTGATTACCGGCAACCTGATGATGCCCGGATTTACTGCGCCTAAATTG
CTATGGGTTCAGCGGCATGAGCCGGAGATATTCCGTCAAATCGATAAAGTATTATTACCGAAAGATTACTTGCGTCTGCG
TATGACGGGGGAGTTTGCCAGCGATATGTCTGACGCAGCTGGTACCATGTGGCTGGATGTTGCAAAGCGTGACTGGAGTG
ACGTTATGCTGCAGGCTTGCCACTTATCTCGTGACCAGATGCCAGCATTATACGAAGGCAGCGAAATTACTGGTGCTTTG
TTACCTGAAGTTGCGAAAGCGTGGGGTATGGCGGCGGTGCCAGTTATCGCAGGCGGTGGCGACAATGCAGCTGGTGCGGT
TGGTGTGGGAATGGTTGATGCTAATCAGGCAATGTTATCGCTGGGGACGTCGGGGGTCTATTTTGCTGTCAGCGAAGGGT
TTTTAAGCAAGCCAGAAAGCGCCGTACACAGCTTTTGCCATGCGCTACCGCAGCGTTGGCATTTAATGTCTGTAATGCTG
AGTGCGGCTTCGTGTCTGGATTGGGCCGCGAAATTAACCGGCCTGAGCAATGTCCCTGCTTTAATCACCGCAGCTCAACA
GGCTGATGAAAGTGCCGAGCCAGTTTGGTTTCTGCCTTATCTTTCCGGCGAGCGTACACCACACAATAATCCCCAGGCGA
AAGGGGTTTTCTTTGGTTTGACTCATCAACATGGCCCCAATGAACTGGCGCGAGCAGTGCTGGAAGGCGTGGGTTATGCG
CTGGCAGATGGCATGGATGTCGTGCATGCCTGCGGCATTAAACCGCAAAGTGTTACGTTGATTGGTGGCGGGGCGCGTAG
TGAGTACTGGCGTCAAATGCTGGCGGACATCAGCGGTCAGCAACTGGATTACCGCACGGGTGGCGATGTGGGGCCAGCAC
TGGGCGCAGCAAGGCTGGCGCAGATTGCGGCGAATCCAGAGAAATCGCTCATTGAGTTGTTGCCGCAACTACCGTTAGAA
CAGTCGCATCTACCAGATGCGCAGCGTTATGCCGCTTATCAGCCACGACGAGAAACGTTCCGTCGCCTCTATCAGCAACT
TCTGCCATTAATGGTGTAAACGTTATCCCCTGCCTGACTTGGTGGGGGATAATTCACATCTATATATATAAATAATTAAT
TAATATTTAGTATGAATTTATTCTGAAAATCATTTGTTAATGGCATTTTTCAGTTTTGTCTTTCGTTGGTTATTCGTAAT
GTATCGCTGGTAGATATGGAGATCGTTATGAAAACCTCAAAGACTGTTGCAAAACTATTATTTGTTGTTGGGGCGCTGGT
TTATCTGGTTGGACTATGGATCTCATGCCCATTGTTAAGTGGAAAAGGCTATTTTCTTGGCGTGTTAATGACAGCAACTT
TTGGTAACTATGCATATCTTCGCGCAGAAAAACTCGGGCAACTGGATGATTTTTTTATCCATATCTGCCAGTTAGTTGCG
TTGATCACTATCGGTCTCTTGTTTATCGGTGTTTTAAACGCACCTATCAATGCTTATGAAATGGTGATCTATCCCATCGC
CTTTTTTGTCTGCTTGTTTGGTCAAATGCGTTTGTTTCGCTCGGCATGAGCAACATAAAGTTCTTACACATTCAGGAATG
AAAGGAATACTGTGATGGACAACAAAATATCAACCTATTCTCCGGCATTTAGTATTGTTTCATGGGTAGCCCTTATTGGC
GGTATTGTTACCTATCTGTTAGGACTATGGAATGCAGAGATGCAGTTAAATGAAAAAGGGTATTATTTTGCCGTACTGGT
ATTAGGTTTGTTTTCCGCGGCGTCTTATCAAAAGACCGTTCGGGACAAGTATGAAGGCATACCTACCACCCCCATTTATT
ATATGACTTGCCTGACGGTCTTTATTATCTCTGTTGCGTTGTTGCTGGTAGGTCTATGGAATGCAACGTTATTACTCAGC
GAAAAAGGCTTTTATGGGCTGGCTTTCTTCTTAAGCTTGTTTGGTGCAGTAGCGGTGCAGAAGAATATTCGTGATGCCGG
AATAAACCCACCAAAAGAAACACAGGTTACCCAGGAAGAATACAGCGAATAATTCACATAAGCCCGGTTAGTCCAATGTA
ACCGGGCTTTTACTAACTCACTAATCTGTTTCTGTCGATTCGTTGTACCAGCATAGAAAGTAACAAACTCGCTGCCAACG
TCGCGCAAAAGATCCAAATAATATCGAGTATTGGCCAGTTTTTAAGCTCAATCCCCCGGGTGCGCAGTGCATGGATAATC
AATGCATGGAACCCGTATATACCTAACGAATAGCGGGAGATTAAGCCAAGTCCGCAAATGGTACGCGTATACAGCGTGTT
TTTAACCAGAGTCAATAACGCGATTGCGCAGATAAAAACCATCGGCCCACAGTAAAGATACCAGGTATCGGCAAAATTTC
CGCGCCACTGTAATTCATATAATGTCCCGCGAGAGATAATAAAAACCCCCGTCGCAAACAGTGCGGCGCTCACCCACGAC
AGTGCTTTATGCTGTGTGTCCATCATCCCTATAGCGCGGCCCAACATGCCATAAAGGATGTAGTAAAAAGTATCGCCATT
GATATATAAGTTAATTGGCAGCCATTCAAAACCGTCGATTTTCTGCGGCACAGTATTTGGATTAGCGATGATGCCAATTA
CCACCATTAGCACCAGCAACATTTTTCCGCCGACGTTCTTCACCTGAATCAGCGGTGAAACCAGATAAATCACTGCAATC
GCGAAGAAAAACCATAAATGGTAAAACACTGGCTTTTGCAGCAGGTTTTTCAGCGCTAACTCCACATTGATGGAGGTAAA
CAGCGCAATGTAGAGCAGCGCGATTGCGCTATAAAAAAACAGGCATAAGCCGATACGCAAGAAATGGCGCGACTGGGCGC
TGCGTTCGCCAAAAAAGAGATAGCCGGAAATCATGAAAAATAGCGGCACGCTGACACGAGAGGCAGAATTCAGAACATTG
GCGATATCCCAGGTGATGGGGCTAACACTATGAGCATTGGTCACATACCAGGTAGTGGTGTGAATCATCACCACCATTAA
ACACGCTATCCCTCGCAGGTTATCAATCCAGTAAATTTTGGGCTGCATCTGTGTCTCTGTATCTGGTTAAAAAAAGTCTG
ACCGATAAATCATTCAGTTGGCGCACTGGAATAATCTGAGTTTTATCACTACAGCTTATAGAGGCTTAAGGAAATTCGTA
AGATATCAGCCACTATACCGATATAAATAATAAGACTCACCTGCAAACCAGACGGTAATTTAATGATGATGAACGCTTTC
TTTCCGGCAATGGCGCTTATTGTGCTAGTGGGTTGTTCTACACCGCCACCCGTGCAGAAAGCACAACGGGTAAAGGTTGA
TCCTCTGCGTTCGTTGAATATGGAAGCGTTATGCAAGGATCAGGCGGCAAAACGTTATAACACCGGCGAGCAAAAAATCG
ACGTCACCGCTTTCGAACAGTTCCAGGGAAGCTATGAAATGCGCGGTTATACCTTCCGTAAAGAGCAGTTTGTCTGTTCT
TTTGACGCAGATGGCCATTTTTTGCATCTTTCCATGCGTTAAGCCCTGCTTTTTCCCGTTTCGTACTGTATATCTTCCAT
CCAGCGGGTATACTGATCCCTTCCTTTAAATCCACACGTATCCAGCACGAAATAATATGCAAAAGTTTGATACCAGGACC
TTCCAGGGCTTGATCCTGACCTTACAGGATTACTGGGCTCGCCAGGGCTGCACCATTGTTCAACCATTGGACATGGAAGT
CGGCGCGGGAACCTCTCACCCAATGACCTGTCTGCGCGCGCTGGGGCCAGAACCGATGGCGGCTGCTTATGTTCAGCCTT
CTCGTCGCCCGACCGATGGTCGCTACGGCGAAAACCCCAACCGTTTACAGCACTACTATCAGTTCCAGGTGGTCATTAAG
CCATCGCCGGACAATATTCAGGAGCTGTACCTTGGTTCTCTGAAAGAGCTGGGCATGGACCCGACTATTCACGACATCCG
TTTCGTGGAAGATAACTGGGAAAACCCGACGCTGGGTGCCTGGGGACTGGGCTGGGAAGTGTGGCTGAACGGCATGGAAG
TGACGCAGTTCACTTACTTCCAGCAGGTTGGTGGTCTGGAATGTAAACCGGTTACCGGCGAGATCACCTACGGTCTGGAA
CGTCTGGCCATGTACATTCAGGGCGTAGACAGCGTTTACGACCTGGTCTGGAGCGACGGCCCGCTGGGTAAAACCACCTA
CGGCGACGTGTTCCATCAGAACGAAGTGGAGCAGTCCACTTACAACTTCGAATACGCGGATGTGGACTTCCTGTTCACCT
GCTTCGAGCAGTACGAGAAAGAAGCGCAGCAGTTGCTGGCGCTGGAAAATCCGCTGCCGCTGCCAGCCTACGAGCGTATT
CTGAAAGCCGCCCACAGCTTCAACCTGCTGGATGCGCGTAAAGCCATCTCCGTCACCGAGCGTCAGCGCTATATTCTGCG
CATTCGCACCCTGACCAAAGCAGTGGCAGAAGCATACTACGCTTCCCGTGAAGCCCTCGGCTTCCCGATGTGCAACAAAG
ATAAGTAAGAGGCGGCTATGTCTGAGAAAACTTTTCTGGTGGAAATCGGCACTGAAGAGCTGCCACCAAAAGCACTACGC
AGCCTGGCTGAGTCCTTTGCTGCGAACTTTACTGCGGAGCTGGATAACGCTGGCCTCGCACACGGCACCGTTCAATGGTT
TGCTGCTCCGCGTCGTCTGGCGCTGAAAGTCGCTAACCTGGCGGAGGCGCAACCGGATCGTGAAATCGAAAAACGTGGTC
CGGCAATTGCTCAGGCGTTCGACGCTGAAGGCAAACCGAGCAAAGCGGCAGAAGGTTGGGCGCGTGGTTGCGGTATTACC
GTGGACCAGGCTGAGCGTCTGACTACCGATAAAGGCGAATGGCTGCTGTATCGCGCCCATGTGAAGGGCGAAAGCACCGA
AGCACTGCTGCCGAATATGGTTGCGACTTCGCTGGCGAAACTGCCGATCCCGAAACTGATGCGTTGGGGCGCAAGCGACG
TGCACTTCGTGCGTCCGGTTCACACCGTGACCCTGCTGCTGGGCGACAAAGTCATTCCGGCTACCATTCTGGGTATTCAG
TCCGATCGCGTAATTCGCGGCCACCGCTTTATGGGCGAGCCGGAATTCACTATCGACAATGCCGATCAGTATCCGGAAAT
TCTGCGTGAGCGCGGGAAAGTCATCGCCGATTACGAAGAACGTAAGGCGAAGATTAAAGCCGATGCTGAAGAAGCAGCAC
GTAAGATTGGCGGTAACGCTGACTTAAGCGAAAGCCTGCTGGAAGAAGTGGCTTCGCTGGTGGAGTGGCCGGTCGTTCTG
ACCGCGAAATTCGAAGAGAAATTCCTCGCGGTGCCGTCTGAAGCACTGGTCTACACCATGAAAGGTGACCAGAAGTACTT
CCCGGTGTATGCGAACGACGGCAAACTGCTGCCGAACTTTATCTTCGTTGCCAACATCGAATCGAAAGATCCGCAGCAGA
TTATCTCCGGTAACGAGAAAGTCGTTCGTCCACGTCTGGCGGATGCCGAGTTCTTCTTCAATACCGACCGTAAAAAACGT
CTTGAAGATAACCTGCCGCGCCTGCAAACCGTGTTGTTCCAGCAACAGTTGGGGACGCTGCGCGACAAAACTGACCGCAT
TCAGGCGCTGGCTGGCTGGATTGCTGAACAGATTGGCGCTGACGTTAACCACGCTACCCGTGCGGGCCTGCTGTCTAAGT
GTGACCTGATGACCAACATGGTCTTCGAGTTCACCGACACCCAGGGCGTTATGGGGATGCACTACGCGCGTCACGATGGC
GAAGCGGAAGACGTAGCTGTCGCGCTGAATGAGCAGTATCAGCCGCGTTTTGCCGGTGATGACCTGCCGTCCAACCCGGT
AGCCTGTGCGCTGGCGATTGCTGACAAGATGGATACCCTGGCGGGTATCTTCGGTATCGGCCAGCATCCGAAAGGCGACA
AAGACCCGTTTGCGCTGCGTCGTGCCGCACTTGGCGTGCTGCGTATTATCGTTGAGAAGAACCTCAACCTTGATCTGCAA
ACGCTGACCGAAGAAGCAGTGCGTCTGTATGGCGATAAGCTGACTAACGCCAACGTGGTTGATGATGTTATCGACTTTAT
GCTCGGTCGCTTCCGCGCCTGGTATCAGGACGAAGGTTACACCGTTGACACCATCCAGGCGGTACTGGCGCGTCGTCCGA
CTCGTCCGGCTGATTTCGATGCCCGTATGAAAGCGGTATCGCACTTCCGTACCCTGGAAGCAGCTGCAGCACTGGCGGCG
GCGAACAAGCGTGTATCTAACATCCTGGCGAAATCTGATGAAGTGCTGAGCGATCGCGTGAATGCCTCTACTCTGAAAGA
GCCGGAAGAAATTAAACTGGCGATGCAGGTTGTGGTGCTACGTGACAAGCTGGAGCCGTACTTTGCGGAAGGTCGTTACC
AGGATGCGCTGGTCGAACTGGCTGAGCTGCGTGAACCGGTCGATGCCTTCTTCGATAAAGTGATGGTCATGGTTGATGAC
AAAGAATTGCGTATCAACCGTCTGACCATGCTGGAGAAACTGCGCGAACTGTTCCTGCGCGTTGCGGATATTTCGCTGTT
GCAGTAATAACGCCGTTATTAAAAAGCCTGCCATCTGGCAGGCTTTTTTTATCGCTAAATAATACAGCAACCTTTAATAA
TCTTCTGCTGAATAAAGATTATCTCATATATTAATTTTATGAGATTTTTTTAGGATTATATCAAGGAGAAGAAACGAACT
TATTAAGCTAGAATAGCCACGGGTGCTTGAGACTGTTTGTCTCAGGTATTCACCGAAAGGCAGACAGAGAAAAGCCCCAC
CTGACTATAAATCAAAGTGAGGCCCCTCTATGCATAGACACCATAAGGTTAGCCTCTTACTCGTTGGAAATCAACACAGG
GGGCTGGGAATGCCGCAGAAATATAGATTACTTTCTTTAATAGTGATTTGTTTCACGCTTTTATTTTTCACCTGGATGAT
AAGAGATTCACTGTGTGAATTGCATATTAAACAGGAGAGTTATGAGCTGGCGGCGTTTTTAGCCTGCAAATTGAAAGAGT
AAGCGTCTTCGGCGGGAAATTATTCCCGCCTTTCTTACGGTGTTGCGCATTCTCATTGCACCCAAATTTATTCTTCACAA
AAATAACACTAGATTCTATTACGCGATCGATTATTTATTTCCTGAAAAACAAATAAAAAAATCCCCGCCAAATGGCAGGG
ATCTTAGATTCTGTGCTTTTAAGCAGAGATTACAGGCTGGTTACGTTACCAGCTGCCGGGCCTTTAGCGCCGCTTTCGAT
GGTGAAGGACACTTTCTGACCTTCGTCCAGAGATTTGTAACCATCGTTCTGGATAGCAGAGAAGTGTACGAACACGTCTT
TAGAGCCATCGTCAGGAGTGATGAAGCCGAAGCCTTTGTCAGCGTTGAACCATTTTACGATACCAGTCATTTTACCGGAC
ATAGTGTATTACCTTTAATAATTAAGTGTGCCTTTCGGCGATATGGCGTGCTTTACAGATTTTGAAGCGTTAAAGGAATG
TGCACTACGAGGGGTATCAACGATAACTCTTGAAGGGACTTGCCTTACTACACTGCTTTAATGGTCTGTACGTCAAACCG
TTGATGTGCATTAAGCCACGCATTGGCGGGTGATGCAACAATTATTTTTCATATTTATGATTAATCGGTTGGAAAACGGT
CCTGTTATCAGGACCGTAAACAGCAATAAAGTGGATAAAAGTCTATTCCATCAACTGCTTACTTAATGCCGGGTTGGCTT
GAATCAAACGCATCAATTTTAGTTCGGCACTTGAAGGCTTCACGCGTCTGGATTCCCATTCCTTTACCATGGCGACTGAT
ACGCCCAAAACCCGGGCAAAATCATCGATTTTTAATCCTGTCCCTTTTCGTAACTGCTCAATTTCGGTACAGGATGTTGT
TCTGTGCGTCAGGGTAATTTTCTGCGTTTCATCTTTAAAAACAATCTGTTCCAGGCTGCTCAACAGCTCATGCATTGGAT
CTTTATATTCCATTGAAAACTCCTCAAATCACACTGCGGGATCGTGAATTGCATCGAAGCTCATTAAGAATAGTCGGGAA
AAACAGACACAGCGGGGTGTAGTCAGGGCATACTCTGACTATGATTCGATTCAGCCAGTCATTTAGCGTGACTTATAGCC
ACCTAACGATCTGATAAATGCCGATATATCTCTTACCACTCCCGGTTTGTAAAGATTTCGAAAATCTAACGTTCTGCGAA
GGCGTAAATCTCTGGCTACAAAAAAGGCAACGGCAATATCATTTTTTAACAATGAAACAACAAATTAACCTTGTTTCATT
TTCTCCATGATTTTACCAGGAAGATTACGTAGAAAGGGTATCCTGCAAGCCTGTCCTGGACTATCCTTGTCACGTCAGAC
ACGCGTGTGTCGTTGTGCGCTTTTTTTGGGTGAAAGGAGTAAGAAAATGGCGACAGGAAAGTCCTGCTCTCGCTGGTTTG
CGCCTCTTGCGGCGTTATTAATGGTAGTTAGCCTGAGTGGGTGTTTTGATAAAGAAGGCGATCAGCGTAAAGCGTTTATC
GACTTCCTGCAGAATACAGTGATGCGTAGCGGTGAACGTCTACCAACCCTGACTGCCGATCAGAAAAAACAGTTTGGTCC
TTTTGTCTCTGATTACGCGATTCTGTATGGTTATTCTCAGCAGGTGAATCAGGCGATGGATTCCGGTCTGCGCCCGGTTG
TAGACAGCGTTAACGCAATTCGCGTACCGCAGGATTACGTTACGCAAAGCGGTCCGCTGCGTGAAATGAACGGTTCGCTG
GGTGTGCTGGCGCAACAGCTGCAAAATGCGAAGTTGCAGGCCGATGCTGCGCACTCTGCGTTAAAACAGAGTGATGACCT
GAAACCGGTCTTTGATCAGGCATTCACCAAAGTGGTAACGACGCCAGCTGATGCATTGCAACCGTTGATTCCGGCGGCAC
AAACTTTCACGCAACAACTGGTGATGGTTGGAGACTACATTGCTCAGCAAGGTACTCAGGTGAGCTTTGTCGCAAATGGC
ATCCAGTTCCCGACGTCACAGCAGGCAAGTGAATATAACAAACTGATTGCGCCATTACCGGCACAGCATCAGGCGTTTAA
TCAGGCCTGGACTACAGCAGTTACTGCAACCCAATAAAGAGTAAAAGCCCGAGCGATTATCGGGCTTTACTCCACGCAGT
CGCGGCTTAGTCCGCGACGTGCGGATTCACACAGTTCTTCTCAACCTTTCCTTGTAACGCATCAATCAAATTATCCACGG
CACAGGCGGCCATGCCATAACGCGTCTCATGAGTGGCAGATCCAATATGCGGTACTGCGACGACGTTGGCCATTGAGAGC
AACGGCGAATCTACGGACAGTGGCTCTTGTTCGAAGACATCCAGCCCGGCGGCGTGAATTTCCCCTTTCTGCAATGCAGC
AATCAGTGCATTTTCATCAACCACCGGGCCACGTCCGGCATTAATGAAAATGGCGGAGGATTTCATTTTGGCGAATTGTT
CTGCGCCAAACAGATGATGCGTTTCATCAGTTAACGGCAGGATCAGGCAAACGAAATCTGACTCTTGTAACAGTGTATCC
AAATCGCAGTAGCGGGCGTTGAAGCGTTCTTCTGCTTCTTTATGGTGGCGGCGCGCGTTATAGAGGATGGGCATATTGAA
GCCAAAGTGCGCACGTTGTGCCAGCGCCATGCCGATCCGTCCCATCCCGACAATGCCCAGTGTTTTATGGTGAACGTCAG
TGCCGTACCAGTCCGGGCCTATGCTCGCGGTCCATTCGCCTGCTTTTACCCGTTCTGCTACCTCCACAACCCGACGAGCG
GTAGACAACACCAGCGCCATCAGCGTATCGGCGACGGTTTCTGTTAATACGGTTGGTGTGTGCATCAGCAGAATTTTTCG
GGCGGTAAGCGCATCGACATCAAAATTGTCATAGCCGACGGAGATCGTTGATGTGGCACGCAGTTTCGGCATTTTTTCCA
GCAATGCGGCATCAACATTCTCGTTTGAACCCAGCAAGCCTTCTGCTTCGGCAAAAATTGCTGCATTTTGTTCGACGGTT
TGTGGGCTGAGGTTTGCCACCTGGTGAACGGTGAAATGTTCTTGCAGGCGTTGCAGTAAATCATCAGGTAAGGCTTTGTA
GAGGATAACGGACGGCTTCATGCTTCTCTCCATTCACTGATAAGGCGATCACCTTAGCCTGAAATATGATGAAGGAAAAC
TGAAGAATGCCAGGTGATTTCTGCATCACCTGACATGAAAGGGATTACAGTGGGCTTAAGGTAATTTCTACACGGCGGTT
TTGCGCCTTACCTTCTGCGGTGCTGTTGCTGGCGATTGGGTTAGCCGGGCCAAGGCCCTGAGTACGGATGCGGCTGGCGT
CCACGCCCTGGGTGATCAACGCGCTGGCAACGGAATCCGCACGCTGCTGGGAGAGACGCATGTTCAGGTCGTGACCCCCC
GTGCTGTCGGTATAACCAATCACGTTAACCGCCGTTTTCGGATACTCTTTCAGTACCATTGCCACGCCGGTCAGGGTGTT
AGCGCCCGCCGGTTTCAGGGTTGCGCTGCTGCTGTCGAAGGTCACATTGTTCGGCATATTGAGGATAATGTTATCCCCGC
TGCGGGTTACGCTAACACCAGTGCCGCGCATTTTGTCACGCAGCTTCGCTTCCTGCACATCCATGTAATAACCAACGCCG
CCGCCCAGAGCTGCGCCTGCTGCTGCGCCAATGAGCGCCCCTTTACCGCGATCTTTCTTCGAAGAAGAGAGCGCACCAAT
ACCCGCGCCAACGAGAGAGCCCAGACCTGCGCCGATAGCAGATTTACCTGCTTCGCGTTCGCCGGTGTAAGGGTTAGTTG
TACAGCCAGATACCGCCAGAGCGCCACTCACTACGGCGGCAATAAGATAAACACGTTTCTTCATTGTTAATCCTTAATAA
CCTTTTTATTCTTTGCCACGGGTTCCGTGGCGGGAGATTATGCCGCGTGAGCATGAAGATTATTCCTGGGAATACTCGGA
AATTTGTAAGTAATATTTAACTGCTCAATACATCTAACCTTTCAGGAGTCTTCGGTTTGGCCAACTCATCCTCACGATAT
TCCGTTCTGACTGCCGCCCACTGGGGGCCTATGCTGGTTGAAACCGACGGCGAAACCGTGTTTAGCTCGCGTGGCGCGTT
AGCCACAGGAATGGAAAACTCCTTGCAGAGCGCGGTTCGCGACCAGGTTCACAGCAATACGCGGGTGCGATTTCCAATGG
TGCGCAAAGGCTTTCTTGCGTCACCGGAAAATCCGCAAGGCATTCGTGGGCAGGATGAATTTGTTCGCGTGAGTTGGGAT
GAGGCGCTGGAGCTTATTCACCATCAACATAAACGCATTCGTGAGGCTTATGGTCCGGCATCGATTTTTGCTGGTTCCTA
CGGCTGGCGTTCAAACGGCGTGCTGCATAAGGCCTCGACATTATTACAACGCTATATGGCGCTGGCAGGCGGTTATACCG
GGCATCTGGGGGATTATTCGACCGGCGCGGCACAGGCGATCATGCCGTATGTCGTGGGTGGCCGCGAAGTTTATCAACAG
CAAACCAGTTGGCCGCTGGTGCTGGAACATAGCGATGTCGTGGTGCTGTGGAGTGCTAACCCACTCAATACGCTGAAAAT
TGCGTGGAATGCATCCGATGAGCAGGGGCTTTCTTACTTTTCCGCACTGCGTGACAGCGGGAAAAAGCTGATCTGCATTG
ATCCAATGCGATCGGAAACCATCGATTTCTTTGGCGATAAAATGGAGTGGGTGGCACCACACATGGGCACCGATGTTGCG
TTGATGCTGGGGATCGCCCATACGCTGGTGGAAAATGGTTGGCACGACGAAGCGTTTCTGGCGCGTTGCACCACAGGTTA
TGCCGTCTTCGCCTCTTATTTGCTGGGCGAGAGTGACGGTATAGCGAAAAACGCCGAATGGGCGGCAGAGATTTGTGGTG
TTGGCGCAGCGAAAATCCGCGAGCTGGCGGCTCTTTTCCACCAAAACACGACCATGCTGATGGCCGGCTGGGGAATGCAG
CGCCAACAGTTTGGTGAGCAAAAACACTGGATGATCGTCACGCTGGCGGCAATGTTGGGGCAAATCGGCACACCCGGCGG
CGGTTTTGGTCTTTCTTATCATTTTGCCAATGGTGGTAACCCCACTCGGCGTTCTGCGGTGCTCTCTTCCATGCAGGGCA
GCTTGCCGTGTGGCTGCGATGCGGTGGATAAAATCCCTGTTGCCCGCATTGTTGAAGCACTGGAAAACCCTGGTGGCGCA
TATCAACACAACGGTATGAACCGACATTTCCCGGATATTCGTTTTATCTGGTGGGCGGGCGGTGCCAACTTTACTCATCA
TCAGGATACCAATCGCCTAATCCGTGCCTGGCAAAAACCGGAACTGGTGGTGATCTCCGAATGTTTCTGGACGGCGGCGG
CAAAACACGCGGATATCGTTCTGCCTGCGACTACCTCTTTTGAGCGTAATGATCTCACCATGACCGGTGATTACAGTAAT
CAGCATCTGGTGCCGATGAAGCAAGTGGTGCCGCCACGCGATGAAGCGCGTAATGATTTTGATGTTTTTGCCGACTTGAG
TGAACGTTGGCAGAAGGGCGGTTATGCACGTTTTACGGAAGGAAAAAGTGAGCTGCAATGGCTGGAAACGTTTTATAACG
TTGCCCGGCAGCGCGGGGCAAGCCAGCAGGTTGAATTGCCCGGGGCATCCAATGTGGCTGGCGCCGGACGAATGGCAGGG
CAGTGCCGAACCGGAACAGTTGCAGGTACTTTCTGCTCATCCGGCGCATCGTCTGCACAGCCAGCTGAATTACAGTTCTC
TGCGCGAATTGTACGCGGTGGCAAATCGTGAGCCTGTCACCATTCATCCTGACGATGCCCAGACGCGCGGCATACAAGAT
GGCGATACTGTTCGGCTGTGGAACTCACGCGGGCAAATTCTTGCCGGCGCGGTCATTAGCGAGGGAATTAAACCTGGCGT
GATTTGTATTCACGAAGGCGCATGGCCGGATTTGGATTTAACCGCTGGCGGCATTTGTAAAAACGGCGCAGTGAACGTGC
TGACCAAAGATCTCCCCAGCTCGCGGCTGGGGAATGGCTGTGCGGGTAATACGGCGCTGGCATGGCTGGAAAAATACAAC
GGTCCGGAACTGACACTTACAGCGTTTGAACCACCGGCCAGCTCATAATCCAGGTGGGTAGTTGGGTTTCATCCTGCCAT
GCGCAATCGACAATGTGAAAACCCTGCGCATGGTAGAAATCTATCGCCGGTTGATTTTTTTGATAAACCTCCAGCATCAG
ATGGGGATAGCGCTGCTGCACATATTGCATCAGCGCCTTACCAATACCGCGTCTGACGGCCTTTGGTGCGACAAACATTG
CTGCCAGAAATCGGCCTTCCATAATGCTGACAAAACCGAGAAGCTTACCGTCTTCTTCCCAGACCCAGTTTTGCGCGTTG
GCAAGATACGCATCCCGCACCAGCGGAATGCAGTCACGCCAGTAATTCGCTTTTATAAAGGGATGCCCCCAGGTTGTACT
TTCCAGCCACAGTTCGAGGATCGCGGGGAGTTCTGAACGTTGCGCTTCCCGAATCATGGTTTATTTCCCGGATAGCAACA
GCAGCCAACCACATGATCATTCACCAGCCCACATGCCTGCATAAAGGAGTAACAGATTGTGGTACCGACAAACTTAAAAC
CACGTTTTTTCAGTGCCTTAGATAGGGCGTCGGAGGCGGGCGTAGATGTGGGGATTTCGCTCAACGTTGTGGCTTGTGTC
ACCTGTGGTTGATGATTGACAAACGACCAGACAAAGTCGGCAAACGGTTCGCCGTTCTGTTCCATTTGCAGGTACGCCTG
CGCATTACCAATAATTGCCTGAATTTTCCCACGATGGCGGATAATCCCGGCGTCCTGTACCAGTCTTTCGACATCCTCTT
CCTGCATTGCGGCAACTTTCACCGGATCGAACTGATGAAAGCATGCGCGATAGTTTTCGCGTTTTTTGAGGACGGTGATC
CACGATAATCCAGCCTGCTGCCCTTCCAGGCAGATCATTTCGAACAGTTTTTTACTGTCAGTTTCAGGCACGCCCCATTC
ATTATCATGGTAGGCAATATAAAGCGGGTCCTGACTCACCCAGCCGCAACGTTCCATACTTTCCCTCGCTATGTACCCGA
TCGTAAAAATTTCAGCCGCTTTTCTTGACGCATCGGTGAAAAAGTCAATATTTAATACAGGGCTACTATGCCCGATATCC
TTCATACAATGACAATAATATTGCCGAATTCGGCTCTTCCCTGGAGTCGTGTTAATGATCATAAAAAAAAGCGGTGGTCG
CTGGCAGCTAAGCCTGCCTGCTTGCGAGCGTGGTAATCAGTGCCTTTTTTCTCAACACAGCTTACGCCTGGCAACAAGAA
TATATCGTTGATACGCAACCCGGACATGCCACAGAGCGTTACACCTGGGATAGCGATCATCAACCTGATTACAACGATAT
TTTGTCGCAACGTATTCAAAGTAGCCAAAGGGCGCTGGGACTGGAAGTCAATCTGGCGGAAGAAACCCCTGTGGATGTGA
CCAGCAGTATGAGTATGGGCTGGAATTTTCCTTTATATGAGCAGGTTACAACTGGCCCGGTCGCGGCATTACATTACGAT
GGCACAACCACCTCGATGTATAACGAGTTTGGCGACAGTACTACCACGCTGGCCGAGCCGTTATGGCATGCCAGCGTGAG
TACCTTAGGCTGGCGTGTTGACTCCCGGCTTGGCGATCTCCGACCCTGGGCGCAAATCAGCTATAACCAGCAATTTGGCG
AGAATATCTGGAAGGCGCAATCAGGCCTGAGCCGGATGACGGCGACAAACCAGAACGGCAACTGGCTGGATGTCACCGTA
GGCGCTGATATGTTGCTCAATCAAAATATTGCTGCCTATGCTGCGCTATCTCAGGCAGAAAATACCACTAACAATAGCGA
CTATCTGTATACGATGGGGGTTAGTGCCAGATTTTAACATTATAGATACAATTAAAAGCCATAAATAACAACTAATGTGG
CGATAGTGGGGACTAACTTACTAAATAATAAATTTGGCGAATAATTGTCGAGTCATTCATTCCTGAACTAATGCATTTCA
TTCCGTTCTGATGGCATTTCATGCCGTTTTTCCCCAGGCATAAAGCGCACTTCGTTATGGTTGTCAGCAGAGATTTTTCC
TTTTTATTACTGCAGGAATACTGCCATGACACCTTCAAATTATCAGCGTACTCGCTGGCTGACACTCATCGGTACTATCA
TTACCCAGTTTGCTCTGGGGTCGGTTTATACCTGGAGTCTGTTTAACGGTGCGCTTTCTGCCAAGCTGGGGGCTCCTGTA
AGCCAGGTTGCTTTCTCTTTCGGCTTGTTAAGTCTGGGGCTGGCAATTTCGTCTTCTGTTGCGGGCAAATTGCAGGAACG
TTTTGGTGTTAAACGCGTCACTATGGCTTCCGGCATTTTGCTGGGATTAGGTTTCTTCCTGACAGCACATTCCAACAACC
TGATGATGCTGTGGTTAAGCGCCGGTGTGTTGGTTGGTCTGGCGGATGGTGCGGGTTACCTGTTGACGCTCTCTAACTGC
GTGAAGTGGTTTCCGGAGCGTAAGGGACTTATCTCTGCTTTTGCTATCGGTTCTTATGGTCTGGGCAGCCTGGGTTTTAA
ATTTATCGACACGCACCTGCTCGAAACGGTGGGTCTGGAAAAAACCTTTGTTATTTGGGGCGCGATTGTACTGGTGATGA
TTGTCTTTGGCGCAACGTTAATGAAAGATGCGCCGAAGCAGGAAGTGAAAACCAGCAATGGTGTGGTGGAGAAGGACTAC
ACCCTGGCAGAGTCGATGCGTAAACCGCAGTACTGGATGTTAGCGGTTATGTTCCTGACTGCGTGCATGAGTGGTCTGTA
TGTGATTGGTGTAGCGAAAGATATCGCTCAAAGTCTGGCGCATCTTGATGCAATTTCCGCAGCCAATGCTGTGACGGTTA
TTTCCATCGCCAACCTTTCTGGTCGTCTGGTGCTGGGCATTCTGTCTGACAAAATTGCCCGTATCCGTGTTATCACCATT
GGTCAGGTGATTGCGCTGGTGGGTATGGCGGCCCTGCTGTTTGCACCATTGAATGCAGTGACGTTCTTTGCAGCGATTGC
CTGTGTGGCATTTAACTTTGGTGGCACGATTACTGTGTTCCCGTCACTGGTCAGTGAGTTCTTCGGCCTCAATAACCTGG
CGAAAAACTACGGTGTGATTTATCTCGGTTTCGGTATCGGCAGCATTTGTGGGTCGATTATCGCCTCACTGTTTGGCGGC
TTCTATGTGACCTTCTACGTGATTTTCGCCCTGCTGATTCTGTCACTGGCGCTCTCTACGACGATTCGTCAGCCAGAACA
GAAAATGTTGCGTGAGGCTCACATATAAAGATATTGCACTATTTATGAATTAAGGGGGGAGGCAATCCCCTCTTTTTTTG
CATATTAATACATCGAAATAAAACAATAGCCTCCAATATTATCCATCACATGAATATTTTCATGAAATTATATTAATATT
TTGTATTGATATATTCCTAAAAAACAAAATAACTTTTTATGCTAAAGCGTAACTATGTGATTACAAATACATTTCATAAA
ATGTCTCACTATTAGCATTTTATGTATTTAATTTCTTTTTTCACATTTATTCGTATAATCCAGTCCTCAAAATTGATGCT
TTTCTGAATCATCAATATTTGCTATTTATTGTGTTTTTTTAAATGGAGTTTTTCATGAAAAAGGTTATTTTTGCCTTGTC
TGCACTGGCATTAACTTCTGGTTCTGTCTTCGCTGCTGATTCTGGTGATGGTACTGTTAAATTTACTGGTGAGATCGTAG
ACGCAGCATGCGTACTGTCTGTTGATTCTCAGAACCAGGAAGTTGTTCTGGGACAGGTTCAAAAATCTGTGTTTGCTGCA
GTTGGTGATAAATCACCATCAAAACCTTTCGAAATCAAGTTGGAAGATTGTGATATCACCACTTTGAAAAAGGCGAAAGT
CAGCTTTAGTGGCGTTGGTGATACCGATAAACCTGAACTTATCTCTGTTAGCACCGAAGCAGGCGCGGCGAAAGGCGTAG
GTATCGGTATTTATGATAACAGCAACACCCTGGTTGCGATGAATAGTGGTGAATCCAGCACTGACCTGAAAAAAGGTCAG
ACAGTTCTTTATTTCACCGCAAACTATGTTTCTACTTTAGCTGCTGTAACTACTGGTTATGGTAATGCTCAGGTTGATTT
CAATCTGTCTTACGAGTAATAGTTAGTTTCACAATTGGCGAAGATGAATTCTCCGCCAATTGTGTTCAACGTTCATGGAT
AGAATGATGAAAAAAAATTCATTGCGTTAACTCTTTGGGTGTTAATTTCGCAGTCTGCACTAGCGAGTGGGGTTGGGCTT
AGTTCTACTCGGGTGATTTATGACGGTAATAAGAAAGAAGCATCGCTAACCGTACAAAACAAAAATAAATCAGAAGAATT
TCTTATTCAGTCATGGGTTGATGATGCAACGGGTAGTAAAAAAACACCATTCATCATTACTCCGCCATTATTCAAACTTG
AGCCAGGAAAAAACAACATCTTACGTATCGTAAATGTGAATCCGTCCTTACCTCAGGATCGTGAATCTGTTTACTGGGTA
AACGTCAAAGCGATTCCTTCTCAAAATGAAGAAAATGAAGGGAAAAATGTCTTGCAGATTGCAGTTCGTACTCGCATCAA
GCTTTTTTATCGTCCAGCAGGTCTAAAAGGGGATATTAAATCTTCGCCAGGAGAACTACGTTTTACGCGAAACGGTAAAC
AGATAAAAGTTGACAATCCAACTGTTTTTAACATCACGTTCAGTGATGTATTTATTAACGGACACGAAATTGAAAAGTCC
GGTATGGTGCCAGCTAAAGGGGCTTTGAATATCTATTTGCCTGCAGGTGTGAACAGTGCTTCGCAAATAAAATATAATAC
AATTAATGATTTTGGCTCTTCAGGTGAATATCTGACTCGCGAAATTAATTAATAGTTTTCAGGGGAACCAACTTAATGTC
ATGGATGGTCGTTTCGCGCACTTACACTTCTTTTTTTCCCTTTTCTTTATCTGTATTGGCGCTTACGGTTGCAGGCTCTT
TTTCTGCGACAGCTGGAAAATTTAATCCGCGTTTTCTGGAAGATACCGCAGGGATCAACCAGCATGTTGACCTTTCCATG
TACGAAACTGACCATGGCGCGCAGTTGCCTGGAACATATCGCGTTTCTTTAATCGTCAATGAACAAAAAATGGAAACGCG
CACTCTGGAGTTTAAGGCGGCTACAGAATCCCAACGAAAGGAGATGGGGGAGTTTCTCATACCTTGTTTAAGCCGGACAC
AACTGGCCGATATGGGCGTTCGTGTAGACAGTTTTTCAGCACTTAACCTTATACCAGCAGAAGCCTGTGTGGCGTTTAAT
GAAATTATCCCTCAGGCGACCAGTCATTTTGATTTTAGCGAACAAAAACTGGTGATGAGTTTTCCTCAGGCGGCAATGCA
GCAGGTTGCTCGCGGTACAGTACCTGAATCTCGCTGGGACGATGGTGTGCCCGCGTTGCTTCTTGATTACAGTTTCAGCG
GTAGTAACAGTTCTCATGATACAAAAAGTTATAATCGCTACATTGATGAAAATGGTAATCATCACCAGGATAAAAACGAA
ACTAGCCAGACTAACGATAGCTACTACTTAAGTATGCGAAGCGGCCTTAACCTTGGGGCATGGCGTCTGCGAAATTACAG
TAACTGGAGCTATAGTAACGGCGAGAAGCAGTGGGACAATATTGGCACCTATGTAACACGGGCCATTGTTCCGCTGAAAG
CGCAACTGACATTGGGTGATACAGCAACACCTTCAGATATTTTTGACAGTGTGCAGATGCGCGGGGCATTACTGGCCTCT
GATGAAGAAATGTTGCCAGACAGCCAACGTGGTTTTGCTCCGGTAGTTCGAGGGATAGCGAAAAGTAACGCGGAAGTCAG
TATTGAACAAAATGGTTACGTGATTTATCGAGCATTTGTCCAGCCAGGTGCGTTTGAAATTAACGATTTATACCCCACAG
CGAACAGCGGTGATTTAACCGTAATTGTTAAAGAGGCTGATGGTAGTGAACAAAGATTTATTCAGCCATTCTCTTCAGTC
GCTGTTTTCCAACGTGAAGGGCATCTCAAATATAGCCTTTCTGCTGGTGAATACCGTGCTGGTAATTACGATAGCGCCAA
CCCACGCTTTGGTCAGTTTAATGCGATGTATGGTTTACCGTTTGGTATGACCACCTATGGTGGCGCATTAATTTCTAAGG
ATTACAATGCATTTGCTCTGGGATTGGGAAAAAACTTTGGCTCTATTGGTGCAATATCGGTTGATATTACTCAGGCAAAA
AGTACATTAAATAATAATGCAACCGATCAGGGACAATCGTACCGCTTTCTTTATTCAAAAAGCTTTGCCAGCGGCACAGA
TTTCCGTTTATTGGGTTACAAGTATTCTACCAGTGGTTTTTATACCTTCCAGGAAGCAACAGATGTGCGTAGCGGTGCTG
ACAGCGATTACGGCCGTTACCATAAGCGTAGTGAAATTCAGGGTAATTTGACACAGCAATTGGGCACCTATGGGTCGGTT
TATTTCAATATGACCCAGCAGGATTACTGGAATGATGACGGTAAGCGCCTTTCTTTGGCTACCGGGTACAACGGCCGTAT
TGGACGTGTTAATTACAGTATTGCTTACAGTTGGAATAAAAGCCCTGAATGGGATGAAAACGACCAGTTATGGTCATTTA
ATATTTCTATTCCGTTTGGTCGGGCATGGAGCAACTACCGCGTGACAACCGATCAGGATGGCCGCACGATACAACAGCTC
GGCGTCAATGGCACTCTGTTAGAAGATCGCAATCTTAGCTATAACGTTCAGGAAGGGTATTCCAGTAATGGTGTTGGTAA
TAGCGGTAATGCCAGTTTGGCGTACCAGGGCGGCGCCGGTAATATCAGCGTGGGTTACAGCTATGGTAAAGACTACCAGC
AGACTAACTACAGCCTGCGTGGTGGCATTGTAGCGCACAGTGAAGGGATCTCGCTTTCCCAACCTTTGGGTGAAACAATT
GCTATAGTTTCAGCACCAGGTGCCCGGGGGGCGAAAGTATTAAATAATAGTGGTGTGAGTGTTGACTGGCAAGGTAATGC
GGTCGTTCCTTATCTGAGTATTTACCGTGAAAATGATGTGTCCATTCGCAGTGAAACGTTGAATGACAGTGTTGATATGA
ACAGCGCATTCCAGACAATTGTGCCAACTCGAGGAGCTGTCGTACGGGCGCATTTCGATACCCGTGTGGGTTATCGAGTT
CTTATGACATTAATTCGGCAAAATGGAGTGAGCGTCCCCTTTGGTGCAACTGCAACGCTGGTTTCAGATACAACTGAACA
GATTAGCGGTATTGTTGGTGAAGATGGTCAGTTATATATCAGTGGGATGCCTAAAACAGGGAATGTGAAGATCGTATGGG
GTAAAGATACGTCACAACAATGCGTTGCGAAATATGAACTACCGGTTGAGGAAAAAAATTCCGGTATTATTTCCGTGACA
GCAAATTGTCAATAAACAAGGAGGTATAACATGATAAAAATATTAAAGCTATTTGTTTTCTGGAGCATATTGTTTACGGC
CAATAATGTTATGGCTGCAGATTGGGGACCCTGTACATCTACATCTGGGGTACATGACTACCCAGTAAATTTTGATGTTA
AAATAGCAGATTCCAGTAAAAATACTGCAGGTACAGAATTAAAACTTATTTATTCATGGAATGGGGTTGGGCAACCCTTT
AGCTTTATTTGTGAGTGCCCTGATACCTATAAAACTGAAAAAGACACATATGTTAAAGTTGAGAGTGGGTTATCGACTAA
AACACGAAAAATAAATAGTGAGCAATACTACCAGTTGACACCCGAACTGGAAGTGATGACCATGATTCAAGGTCCAAGTA
TGTTGTTCCGCGTTCCAGAGGCCAATGCGCAGGTTCCCAATTTAAATAATGCTTCTCAAGACTGTAAAGGCAATAATCTG
GGGCAATTTGGCAGTAATGGCTATCTGTCATTCTATATAGCAAAGCCTGTTCAGGGTGAGGTGGAAATTCCCTACACGCT
TATTGCAACACTGTATGCCTCAAAGAAAAAAAATACATACAGGGATCCACTTTCTACGGTCAGTATTGCAGGGAAATTGA
CCTTTACACAAGGTTGTAAAATTGACGCCGGTACGGTATTGGATGTCCCCTTCGGAGAGTACCCATCTTCGGCGTTTAAA
AATAAAAAAGGAATCATTCCAGTTGGAGGAACTGAAAAAGAGATTAATCTCCAGTTCGATTGTGAAAATATTACCAATGG
CATTCAGGTATCTCTAAGGATTGAAGGAAACACAAGTCAGGCTGACGAGCGGGCCATCGATATGGGTAACCCAGACATTG
GTGTGTTGGTTATGGATCCAAACGGCAATGTCTTAAAGCCTAACGATACCAACAGCAGTGTTAACTTAAACCTCGGTCCG
ATCGATTCCCAACAACATCGCGATGCAACAATTAAACTGAAAGCAGCACCAATCAGCACGACCGGAAATGCTCCAGCTGC
AGGGCAATATAGTGGGGTTGCAACAATCTTTCTGGATATGGATTAGTCATCATGTGGAGAAATAGTATACGTTGCCTGTT
GCCCTTTTTAGCTCTGGCATATTTTCCCGGCGCTGAAGCCAAAATAAGCCTCGGTGAAGCAGGAAAACTGACGTTTTCTC
TTTCAGTCGTGGCCAAAGGGTGTGAGTTTGACGCCACTGATTTAGAAGTTGTCATGGGGAAAATGATGTTAATGAAGCCA
GTCACGGTCGGAAGAGTCATAAACGAAAAAAATTTCGTAATCGAATTAAAAGATTGTGACGGAATATCAAAAGCTAAAGT
AACAATGGACGGCCTTCCTGACACCAATGATAACTCTCTTTTTGCTCTGGATGCCGGAGGCGCAACGGGAATAGCCCTGC
AAATTGTTGACGGCAAGGGCACAAAACAGATTCCGAAAGTCGCTGGTGGAACGGCGATAGAGTGGCCAGTAAATGGAACA
ACAACCCAACTGAACTACAAAGCGAGTTATGTCGTTGTAAACGCCAATGCAACGTCTGGACATGCAAATGCCATGGTCAA
TTTCTCCGTGGAGTATGAGTAACCAGTTTCGGACTTTTGGCAGAAAAAGAGGAGATTACTCCTCTTTTTTACAAGAACAG
TTAATTATTGGTCTGCATTCTGACTTGCTTTTTGTAAATATCTGTAGCTAAAACTCACTTCATTGCCACTTTTCCTTCTC
TCTGTGGTCTACTTAACGACATGAGCAGGGGATGGCGTTCACTACTCCTGCATTTTTTCCTGATACTCCCACTGCAAAAA
CGGAGTGCTGGATATTTTTTCCCCTTTATCCCAGGGTTTGTTTGCATGAGATACATCAAATCGATTACACAGCAGAAGCT
GAGCTTTTTGCTTGCAATCTATATTGGCCTTTTTATGAATGGCGCAGTTTTTTACCGCCGCTTCGGCAGCTATGCGCACG
ATTTTACCGTCTGGAAAGGCATTTCTGCTGTTGTTGAACTGGCCGCCACCGTACTGGTGACCTTCTTTTTACTGCGTCTT
CTTTCGCTGTTTGGCCGCCGCAGCTGGCGTATTCTGGCATCGCTGGTGGTGCTCTTTTCCGCAGGTGCCAGCTATTACAT
GACCTTCCTTAATGTAGTCATTGGTTATGGCATCATCGCATCCGTCATGACCACCGATATCGACCTGTCAAAAGAAGTTG
TTGGTCTGAACTTTATTCTCTGGTTAATCGCCGTAAGCGCGTTGCCTCTTATCCTTATCTGGAATAACCGCTGTCGTTAC
ACCTTGCTCCGACAACTGCGAACCCCAGGGCAACGTATTCGCAGCCTGGCGGTCGTCGTACTGGCAGGTATTATGGTTTG
GGCACCGATTCGTTTGCTGGATATCCAGCAGAAGAAAGTGGAGAGGGCGACAGGTGTTGATTTGCCGAGTTATGGCGGCG
TCGTCGCGAACTCTTATCTGCCATCAAACTGGCTTTCGGCATTAGGTCTTTATGCCTGGGCGCGGGTCGATGAATCTTCC
GATAACAATTCTCTCCTTAACCCTGCGAAGAAGTTTACGTACCAGGCTCCACAAAACGTTGATGATACATATGTCGTTTT
CATTATTGGTGAAACCACGCGCTGGGATCATATGGGCATTTTCGGCTATGAACGCAATACCACACCGAAGCTGGCTCAGG
AGAAAAATCTGGCGGCGTTCCGTGGTTACTCCTGTGATACGGCAACCAAACTCTCACTGCGTTGCATGTTTGTACGTCAG
GGTGGAGCAGAAGATAATCCGCAGCGCACATTAAAAGAACAGAACATTTTCGCGGTATTGAAGCAGTTAGGATTCAGTTC
TGATCTCTACGCTATGCAAAGCGAAATGTGGTTCTACAGCAATACGATGGCGGACAACATTGCTTATCGTGAGCAGATTG
GTGCGGAGCCACGTAACCGTGGCAAGCCGGTAGATGATATGTTGCTGGTAGACGAAATGCAGCAATCGCTGGGGCGCAAC
CCGGATGGTAAGCATCTGATCATTCTGCATACCAAAGGCTCACACTTTAACTACACCCAGCGTTACCCGCGCAGCTTTGC
GCAGTGGAAGCCGGAATGTATTGGTGTTGATAGCGGCTGTACCAAAGCGCAGATGATCAACTCATACGACAACTCGGTGA
CCTATGTGGATCACTTTATTTCCAGCGTGATTGATCAGGTTCGCGATAAGAAAGCGATTGTGTTCTATGCAGCTGACCAC
GGTGAGTCAATTAATGAACGCGAGCACCTGCACGGCACGCCGCGTGAACTGGCACCGCCGGAACAGTTCCGTGTGCCGAT
GATGGTCTGGATGTCGGATAAATATCTGGAAAATCCGGTCAATGCGCAGGCATTTGCGCAGCTGAAAAAAGAAGCCGACA
TGAAAGTGCCACGCCGTCATGTAGAGCTGTACGACACCATCATGGGTTGTCTTGGCTATACTTCACCGGATGGTGGAATT
AACGAAAACAACAACTGGTGCCACATCCCGCAGGCAAGAGAGGCGGCGGCTAACTAAGAGGCCTGCTGACTTTCTCGCCG
ATCAAAAGGCATTTTGCTACTAAGGGATTGACGAGGGCGTATCTGCGCAGTAAGATGCGCCCCGCATTCGGTGATTGGCG
CAGCCTGGTAGCGCACTTCGTTCGGGACGAAGGGGTCGGAGGTTCGAATCCTCTATCACCGACCAAATTCGAAAAGCCTG
CTCAACGAGCAGGCTTTTTTGCATCTGTAACTCATGAGGAAGAGAACCTCCGGGGGCGGGGAGGTTCGATTCGACGTAGG
CCTGACAAGACGCGCCAGCGTCGTATCAGGCAAATGTGCCGGCCCATTGTCGGATGCGGCGTGAACACCTTATTCGACCT
ACACACCACACATTTCCCTGCCAAATTTGCGCCCCATATCTCACTATCCATTAACGGATTTGTGACAGAAACCATTGTCT
TTTTTTATATTTGCTTAAATCTTTTTTTGCGTTACTTATGGCTGGCGCTGGCATTTTCCGCTGTGCGTTTTAGCGTTCAT
GGTATTAATCGCTCAGATATCCACCTTTTCCTCAGATTTTTTTCATTAAATGCATAAAACTTAATCACCAAATGTTGCTA
AATATTAAGCTGATTGTTCTGGTTGTGTTGGCGTAGCACAAATTTCTCTGCTGCAAATAGCTGTTTGAAGTTTTTTTAAT
CTTTGTTTGTGGATTCTCACCGTTGGTGTAAATCCCGGTTGGCTGTATTGACGTTTTCACATTCTGTTGACAGATTGTAG
ATCACGAGGGGCATTTTATGGAGGATCCGCACTGTTACACTGATGTTAATTAGTACGGCATCCCCACCTCATAACGTTGA
CCCGACCGGGCAAAAAACAAAAAAGGTCAGGCAGCGACAACCCACTGCAAAGGGTTAAAACAACAAACATCACAATTGGA
GCAGAATAATGCGTATTTCCTTGAAAAAGTCAGGGATGCTGAAGCTTGGTCTCAGCCTGGTGGCTATGACCGTCGCAGCA
AGTGTTCAGGCTAAAACTCTGGTTTATTGCTCAGAAGGATCTCCGGAAGGGTTTAACCCGCAGCTGTTTACCTCCGGCAC
CACCTATGACGCCTCTTCCGTACCGCTTTATAACCGTCTGGTTGAATTTAAAATCGGCACCACTGAAGTCATCCCGGGCC
TCGCTGAAAAGTGGGAAGTCAGCGAAGACGGTAAAACCTATACCTTCTATCTGCGTAAAGGTGTGAAGTGGCACGACAAT
AAAGAATTCAAACCGACGCGCGAACTGAATGCCGATGACGTAGTGTTCTCGTTCGATCGTCAGAAAAACGCGCAAAACCC
GTACCATAAAGTCTCTGGCGGCAGCTACGAATACTTCGAAGGCATGGGCTTGCCAGAGCTGATCAGCGAAGTGAAAAAGG
TGGACGATAACACCGTTCAGTTTGTGCTGACTCGCCCGGAAGCGCCGTTCCTCGCTGACCTGGCAATGGACTTCGCCTCT
ATTCTGTCAAAAGAATATGCTGACGCGATGATGAAAGCCGGTACACCGGAAAAACTGGACCTCAACCCAATCGGTACCGG
CCCGTTCCAGTTACAGCAGTACCAGAAAGATTCCCGTATTCGCTATAAAGCGTTTGATGGCTACTGGGGCACCAAACCGA
AGATCGATACGCTGGTCTTCTCTATTACTCCTGACGCTTCCGTGCGTTACGCGAAATTGCAGAAGAACGAATGCCAGGTA
ATGCCGTACCCGAACCCGGCAGATATCGCCCGCATGAAGCAGGATAAATCCATCAACCTGATGGAAATGCCGGGGCTGAA
CGTCGGTTATCTCTCGTATAACGTGCAGAAAAAACCACTGGATGACGTGAAAGTTCGCCAGGCTCTGACCTACGCGGTGA
ACAAAGACGCCATCATCAAAGCGGTTTATCAGGGCGCGGGCGTATCAGCGAAAAACCTGATCCCGCCAACCATGTGGGGC
TATAACGACGACGTTCAGGACTACACTTACGATCCTGAAAAAGCGAAAGCCTTGCTGAAAGAAGCGGGCCTGGAAAAAGG
CTTCTCCATCGACCTGTGGGCAATGCCGGTACAACGTCCGTATAACCCGAACGCTCGCCGCATGGCGGAGATGATTCAGG
CAGACTGGGCGAAAGTCGGCGTGCAGGCCAAAATTGTCACCTACGAATGGGGTGAGTACCTCAAGCGTGCGAAAGATGGC
GAGCACCAGACGGTAATGATGGGCTGGACTGGCGATAACGGGGATCCGGATAACTTCTTCGCCACCCTGTTCAGCTGCGC
CGCCTCTGAACAAGGCTCCAACTACTCAAAATGGTGCTACAAACCGTTTGAAGATCTGATTCAACCGGCGCGTGCTACCG
ACGACCACAATAAACGTGTTGAACTGTACAAACAAGCACAGGTCGTGATGCACGATCAGGCTCCGGCACTGATCATCGCT
CACTCCACCGTGTTTGAACCGGTACGCAAAGAAGTTAAAGGCTATGTGGTTGATCCATTAGGCAAACATCACTTCGAAAA
CGTCTCTATCGAATAATTAAAAGCCATACAAGGTTGATGGCAAACGCAAAACTGCCGGATGCGCTCCGCTTATCAGGCCT
ACGAGAGTTCTGCAATGTATTGAGTTTGCACGATTTTGTAGGTTGGATAAGGCGTTTGCGCCGCATCCGGCATAAACAAA
GCGCTCTTTGTCAACAATCTGCATACCCGGTGGTGCTGTGCCTCTGCGTGCAGCGCCATCCGGCAGCAATACTTCATTCC
CTGTCCGACAAGGGCGGGAATTGATTTGTGAGCAATACAGACACGCAGTTCCAGGCTGCGGGTCACTATAGAGAATCCGG
GTTATGTTGCAGTTTATTCTCCGACGTTTGGGACTCGTCATCCCCACGTTTATCGGTATTACCCTTCTCACATTTGCCTT
TGTCCACATGATCCCGGGCGATCCGGTGATGATCATGGCGGGCGAACGTGGGATCTCCCCAGAGCGTCACGCGCAATTGC
TGGCTGAACTCGGCTTAGATAAACCGATGTGGCAGCAGTATCTCCATTACATTTGGGGCGTAATGCACGGTGATTTAGGC
ATTTCGATGAAAAGCCGAATTCCGGTATGGGAAGAGTTCGTGCCGCGCTTTCAGGCCACGCTGGAACTTGGCGTCTGCGC
GATGATTTTTGCGACCGCAGTCGGGATTCCGGTTGGTGTGCTGGCTGCGGTTAAACGTGGTTCCATTTTCGATCACACAG
CGGTTGGCCTGGCGCTGACCGGCTACTCGATGCCAATTTTCTGGTGGGGCATGATGCTGATCATGCTGGTTTCGGTGCAC
TGGAACCTGACGCCTGTCTCCGGTCGCGTGAGCGACATGGTGTTCCTCGATGATTCCAATCCGTTAACCGGTTTTATGCT
GATCGACACCGCCATCTGGGGTGAAGACGGTAACTTTATCGATGCCGTCGCCCATATGATCCTGCCCGCCATTGTGCTGG
GTACTATTCCGCTGGCGGTCATTGTGCGTATGACGCGCTCCTCGATGCTGGAAGTGCTGGGCGAAGATTATATCCGCACC
GCGCGTGCCAAAGGTCTTACCCGGATGCGGGTGATTATCGTCCATGCGCTGCGTAACGCGATGCTGCCGGTGGTGACCGT
TATCGGCCTGCAGGTGGGAACATTGCTGGCGGGGGCGATCCTGACTGAAACCATCTTCTCGTGGCCCGGTCTGGGGCGCT
GGTTGATTGACGCACTGCAACGCCGCGATTATCCGGTAGTGCAGGGCGGCGTATTGCTGGTGGCGACGATGATTATCCTC
GTCAACCTGCTGGTCGATCTGCTGTACGGCGTGGTGAACCCGCGTATTCGTCATAAGAAGTAAGGGGACATCATGTCACA
GGTTACTGAAAATAAAGTGATTAGCGCACCGGTGCCGATGACCCCGTTACAGGAGTTCTGGCACTATTTTAAACGCAACA
AAGGCGCGGTTGTCGGGCTGGTTTACGTCGTCATCGTGCTGTTTATCGCGATCTTTGCCAACTGGATTGCACCCTATAAC
CCAGCGGAACAGTTCCGCGATGCGCTGCTCGCGCCGCCAGCCTGGCAGGAAGGCGGCAGCATGGCGCACTTGCTGGGCAC
CGACGACGTAGGGCGCGATGTGCTGTCGCGGCTGATGTACGGCGCGCGCTTGTCGCTGCTGGTTGGCTGTCTGGTAGTGG
TGTTATCGCTGATTATGGGCGTTATTCTCGGCCTGATCGCCGGTTACTTTGGCGGTCTGGTCGATAACATCATCATGCGC
GTGGTCGATATCATGCTGGCGCTGCCAAGTCTACTGCTGGCACTGGTGCTGGTGGCGATTTTCGGCCCGTCGATTGGTAA
CGCCGCGCTGGCGCTAACCTTCGTTGCGCTGCCGCATTATGTGCGCTTAACCCGCGCCGCCGTGCTGGTGGAAGTTAACC
GCGATTACGTCACCGCGTCTCGCGTGGCGGGTGCCGGGGCAATGCGCCAGATGTTTATTAACATCTTCCCGAACTGCCTT
GCGCCGCTGATTGTTCAGGCGTCGCTCGGTTTCTCTAACGCCATTCTCGATATGGCTGCTCTTGGTTTCCTCGGCATGGG
CGCGCAGCCGCCAACGCCGGAGTGGGGCACCATGCTCTCTGATGTGTTGCAGTTCGCGCAAAGCGCCTGGTGGGTCGTGA
CCTTCCCGGGTCTGGCGATCCTGCTGACGGTGCTGGCATTTAACCTGATGGGTGACGGTCTGCGTGACGCGCTCGATCCC
AAACTGAAGCAGTAAGAGGTTCGAGATGGCGTTATTAAATGTAGATAAATTATCGGTGCATTTCGGCGACGAAAGCGCAC
CGTTCCGCGCCGTAGATCGCATCAGCTACAGCGTAAAACAGGGCGAAGTGGTCGGGATTGTGGGTGAGTCCGGCTCTGGT
AAATCGGTCAGTTCGCTGGCAATTATGGGGCTGATTGATTATCCGGGCCGCGTAATGGCGGAAAAGCTGGAGTTTAACGG
TCAGGATTTGCAGCGTATCTCAGAAAAAGAGCGCCGCAACCTGGTGGGTGCCGAAGTGGCAATGATCTTCCAGGACCCGA
TGACCAGCCTTAACCCGTGCTACACCGTGGGTTTCCAGATTATGGAAGCGATTAAGGTGCATCAGGGCGGCAACAAAAGT
ACCCGCCGTCAGCGAGCGATTGACCTGCTGAATCTGGTCGGTATTCCCGATCCGGCATCGCGTCTGGATGTTTACCCGCA
TCAGCTTTCCGGCGGCATGAGCCAGCGCGTGATGATCGCCATGGCGATTGCCTGTCGGCCAAAACTGCTGATTGCCGATG
AACCGACCACTGCGCTGGACGTGACCATTCAGGCGCAAATTATCGAACTGCTGCTGGAGCTACAGCAGAAAGAGAACATG
GCGCTGGTGTTGATCACTCATGACCTGGCGCTGGTGGCGGAAGCGGCACATAAAATTATCGTGATGTATGCAGGCCAGGT
AGTAGAAACGGGCGATGCGCACGCTATCTTCCATGCGCCGCGTCACCCGTATACTCAGGCATTGCTGCGTGCGCTGCCGG
AATTTGCTCAGGACAAAGAACGTCTGGCGTCGTTGCCAGGTGTCGTTCCCGGCAAGTACGACCGCCCGAACGGCTGCCTG
CTTAACCCGCGCTGCCCCTACGCCACTGATAAATGCCGTGCTGAAGAACCGGCGCTGAATATGCTCGCTGACGGGCGTCA
GTCCAAATGCCATTACCCACTTGATGATGCCGGGAGGCCGACACTATGAGTACGCATGAGGCCACCTCGCAACAACCGCT
GTTGCAGGCTATCGACCTGAAAAAACATTATCCGGTGAAGAAAGGCATGTTCGCGCCGGAACGTCTGGTGAAGGCGCTGG
ATGGCGTTTCGTTTAACCTTGAACGTGGCAAAACGCTGGCAGTAGTAGGTGAATCTGGCTGCGGTAAATCGACCCTCGGT
CGGTTGCTGACGATGATTGAAACGCCCACCGGCGGCGAACTGTATTACCAGGGGCAGGATCTGCTTAAGCACGATCCGCA
AGCGCAGAAGCTACGTCGGCAGAAAATCCAGATTGTCTTCCAGAACCCTTACGGTTCGCTGAATCCGCGTAAAAAAGTTG
GGCAGATTCTCGAAGAGCCGCTGCTGATCAACACCAGCTTAAGCAAAGTACAGCGTCGGGAAAAAGCTCTGTCGATGATG
GCGAAAGTCGGCCTGAAAACCGAGCATTATGACCGCTATCCGCATATGTTCTCCGGCGGTCAGCGTCAGCGTATCGCCAT
TGCCCGAGGTCTGATGCTCGACCCGGATGTGGTGATTGCCGATGAGCCGGTTTCCGCGCTGGACGTCTCAGTGCGTGCGC
AGGTGCTGAATCTGATGATGGATTTGCAGCAGGAACTGGGGCTATCTTATGTCTTTATCTCCCACGATCTGTCGGTGGTG
GAGCACATTGCTGATGAAGTGATGGTGATGTACCTGGGCCGCTGCGTGGAGAAGGGGACGAAGGACCAAATCTTCAATAA
CCCGCGCCACCCGTACACTCAGGCGCTGCTCTCCGCGACACCACGCCTGAACCCGGACGATCGTCGCGAACGCATCAAAC
TTACCGGTGAACTGCCAAGCCCGCTGAATCCACCGCCAGGCTGCGCCTTCAACGCCCGCTGTCGTCGACGCTTCGGCCCC
TGCACCCAGTTGCAGCCGCAGCTAAAAGACTACGGCGGTCAACTGGTAGCTTGTTTTGCCGTTGATCAGGATGAAAATCC
GCAGAAGCCAGCTGTTTAACTCTCCCGATGAGATCAGCTTTCATGCTGATCTCATGTCAAATATGACCTTTTTATGCTTT
ATCTATCATTTATGTATCTTTTTTGACCTTTTTCTTTGCCAATGAGTTATATATGAGCTAAATTATAACCATTAATGAAA
AATGGTTCATTTGTGATACTTAACGAATTTATCTGACCATAAATGATCTTGTTTTTGTCTTTTATCAATCGAAAGGTTCT
TTAATGATCTGCTCAGGACCACAAAATCTGGCTCAAGAGTTGAAAGCGATCGGCGACCAACTCCAGGAGTTGCAGAAGAA
ACTTATTCAGGGGCCGAATATTAGTCAACCACGCCCCCTCCTGACCATTGAGACTCCCCGTCATTTGGGGGAACAACTGA
ACGCACGTCGCAAAGAATTGGGCATTGATTTATACACACTTGAACTACAAACGGGGATCTCAACGTCCACGTTAAAGCGA
CTTTTTAAGGATCCTGAACAGGTTAAATTCGGCAGTGTGTTCGCGGTGGCGAATGTTCTTGGAGTGAAACTATGCATCGG
CGAGTGAAAGTGTTGCTCTATGGTCAGGTAGTGGGTGAACTCTCTCAGAACGACAGTGGTTTTTTGTTCCAGTACGCCCA
CGATTACCACGGACCGGCAATCTCAATCAGTCTGCCCGTCGCACAGCGTCAGTTTCCCAGTGAGACGTTGCATCCTTATT
TCGCCTCACTGGCGCCAGAAGGATGGCTGCGTCAACGCTACAGCCAGATACAGCATCGTGACGAAAACGATCTGCTGGGA
ATGCTTATTGATAACGGCAAGAATCTGCTGGGGGCCATCCAGATTTTACCTTGGGAGGAATAATGGCGAATTGTCGTATT
CTGTTAACGCCGTTGAATGAACGTGACGAACAGCGCGGATATTCGACACAGGGGTTGAAGCGACTGAGCGGCACTGCAAA
ATTGAATCCTCGGCTGGGGTTTACGCGAACTCAGTTTGTGCAGGAACTTCCGCGTCAACAAAAAGGGATGAGTATTTCCG
GTTACCAGCCCAAATTGCAATTAGTGCTGGATGAAGGAGAGTTCCGCGTCGTAGATCATCAGGGAAATTTTATCCTTAAG
CCCTCTCCAGCCGACTTTCCCGGTTTGGCCGAAAATGAACACGCAACAATGACATTGATGTCTCGTTTGGGATTTGACGT
ACCTGTGCATGGCCTGTTGAGTTTTGCACCACAATCAGAGGAAGAGCTTGAATACGCATTTGTTATCCGGCGCTATGACC
GGGATAACAAGGGGCTGCCAGTGCATCAGGAACAGCTTGATGGCGCGATGCAGATTACAGATAAATATGGCAAAACGGGG
AATGATAACGAACAATATGTCAGCTATGAAACGCTGGCCCGATTTTTAGTTGCCCATGTTAACGACAACATCGCATTTAA
AATCGATCTCTTTCGTCGCATTGTTTACGCCTGGTTGCTGGGTAATAACGACATGCATTTACGAAACTTTGGCTTAGTGT
ACTCCGATGGTTTGACGCCTGCGTTAGCGCCGGTGTATGACTTTGTTTCTGTCGCTCCCTATCCGGAATATTTTTACTCA
AACTATCTGGCGCTGCCGTTATTGACGCGAGAAGAAGGCGGTCGGGAACTGGCTCCTGGATTTCACAGTGATTATGGCGA
GTATATCGGGCAGGACTTTTTGCTGTTGGGTGAATCAATGGGGTTAGCGCCCAGATTGCTGGAAAAACTCTTTCAGGATA
TACGTAAAGAAAATGCCATTGTTATGGAAACGTATGAGCAGTCCTTTATGACTCAGGATCATATCCAGGCTGTGCTGCAA
TGCTATCGACATCGTCTGGGGCTGCTGTGAGCAGCCCCCGTTACTTTTATTCAATCAGCTTCAATAGCGGCGAAAAGCAC
AGCAAAATACCATAAAACAGGATAAGCCATGTTTTTAGCCCGCGTAGTTTTTTCAGTTGTGAAACTTTAGAGATCAGGAA
AAATGGAATGAGGCACGACACAATGCCATATAACGGGCTTCCCAACTGAAAGAACACCAGCACCGATACACGAAACGAAA
CCCAAATCGTCAACGTAATGACGATAAAAGCGCAGATCGCCAGAGTCAGCATGCGTGAGTTAATTTTCCTGGTATCAATA
ATTCGGCTTAACAGATTGAGAATAATGCCTTTAATGGCCTCGTGGAAACCGAGATAAATGCCAAAGAATGCAGTCAGTAC
GGCAAAGATATTCAGCACCGTAGAGGTGATATGAATGATATGCCCAGGGATCACCTGCGCGGCCAGTGCCAGTGCCGAGA
TATTTTGTTCAAAGGCAGAAACGGCTTCTTCGTGGCTAATTGAGAAGGTAAACGAAAAGGCAAAAAACAAGATCACCGCA
ATGAGCGTGATATAGCTAATCCGGTGGGTACGCAGCGCGAGCCGGGTTGCCAGTACTTTATCCGCTTCCCGTTTACGATA
GGCAATATTCATTGGGTTAAGTACCTGAATAAATACTGCGGAAAAGAAGCAAAATGGAATAGTAAGCAGGACATCGCGGA
AAAAGTCGGAGGCTTGCGGGAAGGCGGTTATATTGGCGAAATTCCAGTGCGGGATCATCGCAAAACCGAACACGACAATA
ATCCCCACTTTGACCACCACCATTGGCCCGGAAATCTTAAACAGTAATCGTTCACCACCAGACGCAATCGCCACCAGTAC
GGCGAAAATGGCGACTTTATAAAATAGAGATTGAGAAAGATCGGCATCGGTTAAACCGAAGGTTTTCAGGTACGAGGCGC
TGTCGAAAACCACGGAGAGAGAGTAGATAAAAATCCCGTGGATAATCATCAAAAAGTAGATAACCCCGAGGAAAATTCCC
CAGTTCTTCCCCAGGTAATGACTGATAATATCGGTGTAGTCATTACAGGAATCGCTTTCAGAAAGGGTTTTTAAATAAAT
GTCCTGTACTACCCAGGTGGCAGGATAAGCAATGATCGCTGCGGTAATAAATACCCAAATTCCCTTCAATCCAATTTGTA
CTGGCATCAGCACGGTTCCGGCACCAATCGCCATGCCTATGCATAATAAAACCCAGCCGAAGTCGTAGCGTGTAAACGGC
AATTTCTGATCGTGTTTCGGTAGTGTGTTGTGCTGCATAAAGTCCTGTCCAGAAAGAAGTCGGCCTCGCAAAAATGAATA
AACCCAGTTTCTCTTGCGCAACAGGTGGAGAAGTCGAATACGCAGTATGTAAAAAATGAGGCAACAGATTCACTGGGGAG
GTCGCGAGGAGGCGCAATTCTACAAAATTGCGCATTTCACTACTAGTCTGGAGTCAGCCCGGATATGAGCTGCAACTATT
GCAAATAAAGAAATTAAGCTGGAAGGCATCACGCAATGAGGAAGATTGCCGGGTGCTGACGGCAAAAAGCAATCGTAAAA
TCAGCGGCAAGCCGGAAGGGTTCCGGTGAGGCGCAATGTTGCGGGGGCTTTATCCCTGGTGGCATTGGTTGCTGGAGAGA
GAAAACCCCCGCACGTTGCAGGTATGCACCTGACAACATCACGGGGGCCATTCTTGCATCTAGACCATTCAAGAATAGCC
GCGAAACGTTGTCATTACAACACAGGCGGCTATATGACGCTCGCAGAGCTGGGCATGGCCTTCTGGCATGATTTAGCGGT
TCCGGTCATTGCTGGCATTCTTGCCAGTATGATCGTGAACTGGCTGAACAAGCGGAAGTAACGTGTCATGCGGGCGCCAG
GCTGCCGTAATGGCAATTTGCGCCCGGACCAGGCCGCAGAGGTGAAACTCTGCGGCCTTTTTCGTAAGAAAAATGCAACG
GTTGCAAGCGGATAATATTCTGCGGAATGCGCAGCACAGAGTGAAGAAGTGATGGATTCCGGAGCAGAAAAACAGTCGTA
GAATCAGCGGCAAGCCGGAAAGGTTCCGGTGAGGCGCAATGTTGCGGGGGCTTAATCCCTGGTGGCATTGGTTGCTGGAG
AGAGAAAACCCCCGCACGTTGCAGGTATGCACCTGACAACATCACGGGGGCTAATCTTGAACCTAGACCACTCAAGAATA
GCCGCGAAACGTTGTCATTACAACACAGGCGGCTATATGACGCTCGCAGAACTGGGCATGGCCTTCTGGCATGATTTAGC
GGCTCCGGTCATTGCTGGCATTCTTGCCAGTATGATCGTGAACTGGCTGAATAAGCGGAAGTAACGTGTCATGCGGGCGT
CAGGCTGCCGTAATGGCAATTTGCGCCCGGATCAGGCCGCAGGGGGAAACTCTGCGGCCTTTTTGTGCACAGAAAACCCC
CAGCTAGGCTGGGGGGTCCGGAAAGCTTTCAGCTTTGAGCCAGTTATTAAAACCCCTTTTGATTTGTTAAAACACCTTGC
GGTCTGGCAACTGCAAGTGTCAAACAAGAAATCAAAAGGGGGTCCCAATGGGGAACGAAAAGAGCTTAGCGCACACCCGA
TGGAACTGTAAATATCACATAGTATTTGCGCCAAAATACCGAAGACAGGTGTTCTACAGAGAGAAGCGTAGAGCAATAGG
CTGTATTTTGAGAAAGCTGTGTGAGTGGAAAAGTGTACGGATTCTGGAAGCTGAATGCTGTGCAGATCATATCCATATGC
TTGTGGAGATCCCGCCCAAAATGAGCGTATCCGGCTTTATGGGATATCTGAAAGGGAAAAGCAGTCTGATGCTTTACGAG
CAGTTTGGTGATTTGAAATTCAAGTACAGGAACAGGGAGTTCTGGTGCAGAGGGTATTACGTCGATACGGTGGGTAAGAA
CACGGCGAAGATACAGGATTACATAAAGCACCAGCTTGAAGAGGATAAAATGGGAGAGCAGTTATCGATTCCCTATCCGG
GCAGCCCGTTTACGGGCCGTAAGTAACGAAGTTGGATGCAAATGTCAGATCGTGTGCGCCTGTTAGGGCGCGGCAGGTAA
GAGAGTCTTATAGGCGCATTTGAAAAACCTCCGGCTATGCCGGAGGATATTTATTCGTTCTTACTGCGGGTAAGGCACCC
AGTCGCCGCCGTTCAGGCGAACGTACGGTTTATCCTGGTATTGAATAACTACTGCATTTGAGTTCTCAGAGACCGGTGCT
GTTTGTGGTAACCCACTGGTGAGTTTTTTCCAGTCAACATTGTCTTCGGTGAAAATCTTGCCATCAAGAACGCGAACCAC
CAGATCGGAGATAGCCAGGAAGCTGCTCGGTTGGTCGATGACAATCGGAGCCCCCTGATGTGGTGCCTTCATGCCGAAGA
ATTTCACCCCAACGGGGACGTCTGTGATAGACGGGCTAGGGATATCACGTAGACCAGATACCTGCATTCTGTCGCCCTTC
AGCGCGCCGCCGTGTTCCGGCACCACGACCACCATCACTTTACGACCCGATTTCTCCAGTTCAGTAAAGAAGGCGTCCAG
TTCATCAAAGAATTTTTGCGCCCGCGCTTTGTAATCCGCTGTTTTGCTGACGCCCGGATAATGGTTGCCGTCATGCAGTG
GAAGCGTGTTGTAGAACGTGGCACTACGGCTGTTTTTATCTTTTTCGGTAACGTCCAGCCAACGGTTAAGCACGGCGGTA
TCGTCATAAACCGGCGAACCATCAAAGCCCAGCAAAATAACCGGCAGATTTGTTTGATCCATCAATTCGCTCTGCATGCC
GCCATTTTCGCGAACTTCCTTCAAAAAACCACCGAACTGGCCGTTATGTCCCATCATCAGGTGCTGGGTAAAGCCCAGTT
TCGACAGGTTATCAAACAGATAGCAGTCGTTATTTGCCGGTTGATACAGATTAGTGTGCGAAGTCTGCCCGCAGCTGGCG
CGCAGTAAACGGATCGCCGCCGGGCCACTGTAGGAGGTGGCGGAGTTAAAGTTCTTGAACTCAATATCGAAATGCGACCA
CAGTGGATGCGACATCAATCCGGCGGCTTTAATATCCGACCAGGAAAGCGAACAGATATTAATCACCAGTAGTTCAAATG
GCTGAGCATCAGCGGGCAGCGAAGACGGGAAGATCGATTTACGTTTCGCCTCCGCGTTATAGAAATTATTCAGCCAGGCG
TTAAGGTTTGCTGTTGTTGGCGGTGCAGTTTGTGCGGGTATATCACCCACTACCGGTGCGCCACCCGTCGCCGCAACGGT
TGCCGCTGCGTTACCACCCGTCGTTGTTACAGTGGTCGTTGGTTGACCGGCTGGCCACAAGGAGAAACTTGGTCCCGCCA
GGGTAAGTACGTTCAGCCATAGCAGAATGGCAACCACAAAAACGGTAATGCGAATCCATTGTGACAGGAATAACCAGGCC
ACGAATAAAACAAAAATGGCCCCAATCATCTGCCAGTTAATAAAGCGTGTGACAAGATCGATTAAATAATCGGTACTGAA
CCCCGCCACCTGCGAACCCTGGCTCATTATGCTTTCCGGGCCAGGCAACCAGGTGTCATGCCAGAACAAAGCAAAGCCGA
TCGGCAGGGCAATCCAGTGGCGCAAGCGATGCAGGCTATAGTGCGGAATGGGCATCAGTAGAAACGCGGCAAACACCAAA
TTGAGGAGCGGATGGAAGTTAAGATATCCCGCCCACAACAGGCCGAACTTAACCAGAAAATAGAAGTTCCAGCCGGAAAG
GCCGCGCCAGTATTGCCAGAGGGAAGAAGGCATGGCGGTATTTTGCGTAAATTGAGTCATTTTTGGGTTGCCCTGGCTTT
TTCCGTGCGGCGTAACGTCCCGGCCGGTTTAACATAACGAGGTTTAGCAAAGAACAAACGTAAGGTGTCGCGAATGCGTC
GCAAAGAGTGCCGCGCCAGATAGCCCAGCGGGAAAAATATCAGTGCGCAAACGACAATAATTTCAATGATATCGCTGATG
GTCATCATGATGAGCGCTCCACAGCATCATCTAACAGTCGCATTGGTTCTGGTATTCGTCGCCAGTGGCGACCATCGTGC
TCGGCATTGATGACCGGTTTAGAACTTTGCGCTAAAGGCAGCGGCATGCCCCATTGTTCTGGGGCAAGCAGGCGCATCTG
CACCAGCTCGGCACTGATTTGATCATCTTCAAACCAGACCATTCGGTTTGAGAAAATGTCGCCAGTAGGCAATGGGAAAA
TATGATTCAACGCGGTATCCAGATCGTTAATCCGACAGAATGAGAGAAACAGCACCAGCCGATTACCGCCAATGGTCATG
ATATCGCCGGTACGGTTAGGGCGACATAGCGTCAGGGCTTGCTCAACGCGGATACCCGGTACCGGACGTAGGGCAACCAG
AACGCCTTTACCGTGGGCAGGTAATAGAGGGTTATTCATCATGTTGTTGACGGCATTACAGAACACATCCCACTTCTGGA
AACCACGCAGTTTGAGCGGCTGGGTCATTGACAGCAAGGTAGTTATATCTTCCGGCACATAGCGACTAAACTTCTGCCCT
TGCACGCTTTCGATCATCGTCAGACAGCGGGAGAGTGGCGCATTCCACGGGATAACCATATTTGCACCGCAGGCCAATAA
TAAACGTTCATCGGTGGCGCGCAGGCTGGCGGTATTTTCCCGTACGAGGATTTTCATCGCACTACCGCGCTGGCGACGCA
GAGTATGAATGCTGCGGGCCAGTGGCTCGATTTGCGCATTTTGCTGTAAAGAAAAGACCACCGTCGCCGCCTGAGCGGTA
CGGGCTTCATTGAACAGGACTTCGTTATTGTTGAACAGTTGCCAGTGTTCCGATAGCGGCGGCGCACCTTCCAGTACAGC
AACATTACTCAGAATGCGTTTTTCGTCGCTGCGTGGTTGGATTTCCGCCTCTTGGTGTTGAACTAATGTCCAGCAACCAT
TTTGTTGCTGAACGCTAAGCTGCTGACGGGCGCTGACCCCTTTTTCGTTGCACCAGAAAGCAATATCCAGCAAATGTTGG
CCGCCCTGAAAACGCAAACTGGCAAGACCAAAAAGTGAACGGTATTCCTCAAGTAACAATGAAAATTGTTTATCGTTATT
ATTTCCGGAATTAATTACCAAAAGCGAACAATGGTTTAGCCTGCTCCATTTATTCATTTTATCCAACCATGAGCGAAGCC
GCTCGGCAGGAATGTTTTGCCATGCGTTATTTGCGCAAACAAGAATAAAAAGGTAATTATGGGGATCAATAGAACACTGC
AAATCACGGGCCAAATAGTATAGACCTTTTTCATGATTTAGCATTGAAAATAATGTTATTTTTCCCGGCCCTTGAGAATC
ATCTAATTGAAAGATTTTCGCTGGATCGCTGTCCATGCTAATGACCGCGACGTGTGCGGTTTCAGCCTGGGATGCAATTG
TTTGATTCGCCAGACTGATAGCATCTTCATGGCGATCGACGTTAAACCACCAGACGCCGCCTGCTGGCATATGTCGCAGC
TCATCCCATAATGATGAGATACCGATAGAGAATACAGGGTCCACAATGTCCCTCATGTCAACATTTTGTCTGATTATCAG
TTTACTAGCGAAAGCTAAGAAATAAACCTACCATTGAAATTAAAACTTATCAGATTTAGCATGTGAATCAATTTAGCAGG
TCACAAGACATGTGATTTTAGTCTTTTCGTTTTTAACTTTTTCTGTTGCGTAACGGAAAGTCAAAAAGTGAGCACATTCC
CGTCTCGCCGTAAACAATAAACCGACGAAATGCTCACAGTTAGAATTGTCTCATGAACGGTACGGTTATTTCATAGGGAT
CAAGAAAAATGAATAACAATGAACCAGATACTCTGCCTGATCCCGCGATAGGCTATATCTTCCAGAATGATATTTTGGCG
TTAAAGCAGGCATTTTCACTGCCTGATATTGATTATGCCGATATTTCCCAACGCGAACAGTTGGCCGCGGCATTAAAACG
CTGGCCGTTGCTGGCAGAGTTTGCGCAACAAAAGTAGGGGATTGGTGAATGGCCGTACTGGGATTGCAGGGGGTTCGGGG
AGGCGTGGGGACAACAACCATCACCGCCGCATTAGCCTGGTCATTACAAATGTTGGGAGAAAATGTCCTGGTGGTCGATG
CCTGCCCGGACAACTTGTTGCGCCTGTCATTTAACGTTGATTTTACCCACCGTCAGGGTTGGGCCAGAGCTATGCTGGAT
GGCCAGGACTGGCGTGACGCCGGGTTGCGCTATACCTCGCAGCTCGATTTGCTGCCTTTTGGTCAGTTATCCATTGAAGA
ACAAGAAAATCCACAGCACTGGCAAACCCGGCTGAGCGATATTTGCACCGGCTTACAGCAACTAAAAGCCAGCGGGCGTT
ACCAGTGGATTTTAATTGACTTACCGCGTGATGCCTCGCAGATAACCCACCAGCTGCTGAGTTTGTGCGATCACTCGCTG
GCAATCGTCAATGTGGATGCCAACTGCCATATCCGACTGCATCAGCAAGCGCTGCCGGATGGTGCACATATTTTGATTAA
TGACTTCCGTATTGGCAGCCAGGTTCAGGACGATATTTACCAGCTTTGGTTGCAAAGCCAGCGCCGATTGCTGCCGATGC
TCATTCATCGTGATGAAGCGATGGCTGAATGTCTGGCAGCTAAGCAACCAGTCGGTGAATTTCGCAGTGATGCGCTGGCG
GCTGAAGAAATACTGACGCTGGCTAACTGGTGCCTGTTAAACTATTCCGGGCTGAAAACGCCAGTCGGGAGTGCATCATG
AGTATCCTGACCCGGTGGTTGCTTATCCCGCCGGTCAACGCACGGCTTATTGGGCGTTATCGCGATTATCGTCGTCACGG
CGCGTCGGCTTTCAGCGCGACGCTCGGCTGTTTCTGGATGATCCTGGCCTGGATTTTTATTCCGCTGGAGCACCCGCACT
GGCAGCGTATTCGCGCAGAACATAAAAACCTGTATCCGCATATCAACGCCTCGCGTCCGCGTCCGCTGGACCCGGTCCGT
TATCTTATTCAAACATGCTGGTTACTGATCGGTGCATCGCGCAAAGAAACGCCGAAACCGCGCAGGCGAGCATTTTCAGG
TCTACAAAATATTCGTGGACGTTACCATCAATGGATGAACGAGCTGCCTGAGCGCGTTAGCCATAAAACACAGCATCTTG
ATGAGAAAAAAGAGCTCGGTCATTTGAGTGCCGGGGCGCGGCGGTTGATCCTTGGTATCATCGTCACCTTCTCGCTGATT
CTGGCGTTAATCTGCGTTACTCAGCCGTTTAACCCGCTAGCGCAGTTTATCTTCCTGATGCTGCTGTGGGGGGTAGCGCT
GATCGTACGGCGGATGCCGGGGCGCTTCTCGGCGCTGATGCTGATTGTGCTGTCGCTGACCGTTTCTTGCCGTTATATCT
GGTGGCGTTACACCTCGACGTTAAACTGGGACGATCCGGTCAGCCTGGTGTGCGGGCTTATTCTGCTGTTCGCCGAAACG
TACGCGTGGATTGTGCTGGTGCTCGGCTATTTCCAGGTCGTATGGCCTCTGAATCGTCAGCCGGTGCCATTGCCGAAAGA
TATGTCGCTGTGGCCGTCGGTGGATATCTTTGTCCCGACTTACAACGAAGATCTCAACGTGGTGAAAAATACCATTTACG
CTTCGCTGGGTATCGACTGGCCGAAAGACAAGCTGAACATCTGGATCCTCGATGACGGCGGCAGGGAAGAGTTTCGCCAG
TTTGCGCAAAACGTGGGGGTGAAATATATCGCCCGTACCACTCATGAACATGCGAAAGCGGGCAACATCAACAATGCGCT
GAAATATGCCAAAGGCGAGTTCGTGTCGATATTCGACTGCGACCACGTACCAACGCGATCGTTACTGCAAATGACCATGG
GCTGGTTCCTGAAAGAGAAACAGCTGGCGATGATGCAGACGCCGCACCACTTCTTCTCGCCGGATCCGTTTGAACGCAAC
CTGGGGCGTTTTCGTAAAACGCCGAACGAAGGCACGCTGTTCTATGGTCTGGTGCAGGACGGCAATGATATGTGGGATGC
CACTTTCTTCTGCGGCTCATGTGCGGTGATTCGCCGTAAGCCGCTGGATGAGATTGGCGGTATTGCTGTCGAAACGGTAA
CCGAAGATGCGCACACTTCTCTGCGTCTGCACCGTCGTGGCTACACCTCCGCGTATATGCGTATTCCGCAGGCAGCGGGG
CTGGCGACCGAAAGTCTCTCGGCGCATATCGGTCAGCGTATTCGCTGGGCGCGCGGGATGGTGCAAATCTTCCGTCTCGA
TAACCCGCTCACCGGTAAAGGGCTGAAGTTTGCTCAGCGGCTGTGCTATGTCAACGCCATGTTCCACTTCTTGTCGGGCA
TTCCACGACTGATCTTCCTGACTGCGCCGCTGGCGTTCCTGCTGTTTCATGCCTACATCATCTACGCGCCAGCGTTGATG
ATCGCCCTGTTCGTGCTACCGCATATGATCCATGCCAGCCTGACTAACTCGAAGATCCAGGGCAAATATCGCCACTCTTT
CTGGAGTGAAATCTACGAAACGGTGCTGGCGTGGTATATCGCACCACCGACGCTGGTGGCGCTGATTAACCCGCACAAAG
GCAAATTTAACGTCACCGCCAAAGGTGGACTGGTGGAAGAAGAGTACGTCGACTGGGTGATCTCGCGGCCCTACATCTTC
CTTGTTCTGCTCAACCTGGTGGGCGTAGCGGTTGGGATCTGGCGCTACTTCTATGGTCCGCCAACCGAGATGCTCACCGT
GGTCGTCAGTATGGTGTGGGTATTCTACAACCTGATTATTCTCGGCGGCGCAGTCGCAGTATCGGTAGAAAGCAAACAGG
TACGCCGATCGCACCGCGTGGAGATGACGATGCCCGCAGCAATTGCCCGCGAAGATGGTCACCTCTTCTCGTGTACCGTT
CAGGATTTCTCCGACGGTGGTTTGGGGATCAAGATCAACGGTCAGGCGCAGATTCTGGAAGGGCAGAAAGTGAATCTGTT
GCTTAAACGCGGTCAGCAGGAATACGTCTTCCCGGCTCAGGTGGCCCGCGTGATGGGTAATGAAGTTGGGCTGAAATTAA
TGCCGCTCACTACCCAGCAACATATCGATTTTGTGCAGTGTACGTTTGCCCGTGCGGATACATGGGCGCTCTGGCAGGAC
AGCTACCCGGAAGATAAGCCGCTGGAAAGTCTGCTGGATATTCTGAAGCTCGGCTTCCGTGGCTACCGCCATCTGGCGGA
ATTTGCGCCTTCTTCGGTGAAGGGCATATTCCGTGTGCTGACTTCTCTGGTTTCCTGGGTTGTATCGTTTATTCCGCGCC
GCCCGGAGCGGAGCGAAACGGCACAACCATCGGATCAGGCTTTGGCTCAACAATGATGATAACGCGATGAAAAGAAAAAT
ATTCTGGATTTGTGCAGTGGCTCTGGGGATGAGTGCGTTCCCCTCTTTCATGACGCAGGCGACGCCAGCAACGCAACCAC
TGATCAATGCTGAGCCAGCTGTAACCGCCCAGGCGGAGCAAAATCCGCAGGTGGGGCAAGTGATGCCGGGCGTGCAGGGC
GCAGATGCGCCAGTCGTGGCGCAGAACGGTCCTTCCCGTGATGTGAAGCTGACCTTTGCGCAAATTGCGCCGCCGCCGGG
CAGCATGGTGCTACGTGGCATTAACCCGAACGGCAGCATTGAGTTTGGTATGCGCAGCGATGAAGTGGTGACGAAGGCGA
TGCTCAACCTCGAATACACGCCATCGCCATCATTACTGCCTGTCCAGTCGCAGTTAAAGGTTTATCTCAATGATGAACTG
ATGGGCGTGCTGCCAGTGACCAAAGAACAGTTGGGTAAAAAAACGCTGGCACAAATGCCCATTAACCCGCTGTTTATTAC
TGATTTCAACCGTGTGCGGCTGGAGTTTGTCGGCCATTATCAGGACGTGTGCGAAAACCCGGCCAGCACCACGCTTTGGC
TGGATGTTGGGCGGAGCAGTGGACTGGATCTGACCTATCAGACCCTGAATGTGAAGAATGACCTGTCACACTTCCCGGTG
CCATTCTTTGACCCGCGTGATAACCGCACCAACACCTTGCCGATGGTCTTTGCGGGTGCGCCAGATGTTGAGCTGCAACA
AGCATCTGCCATTGTCGCCTCGTGGTTTGGTTCGCGTTCTGGCTGGCGTGGGCAGAACTTCCCGGTGCTCTATAACCAAC
TGCCGGATCGCAATGCTATTGTCTTTGCCACCAATGACAAACGCCCGGACTTCCTGCGCGATCATCCGGCGGTAAAAGCC
CCGGTGATTGAGATGATTAACCATCCGCAGAATCCTTACGTCAAACTGCTGGTGGTGTTTGGTCGTGACGACAAAGACCT
GTTGCAGGCAGCGAAAGGTATCGCTCAGGGTAACATTCTGTTCCGTGGTGAAAGTGTGGTAGTGAATGAAGTGAAACCGC
TGCTACCGCGTAAGCCGTACGATGCGCCGAACTGGGTGCGTACCGATCGTCCGGTTACCTTTGGTGAACTGAAAACCTAT
GAAGAACAATTACAATCCAGCGGTCTTGAGCCAGCAGCGATTAACGTTTCGCTAAATTTGCCGCCGGATCTCTACCTGAT
GCGCAGTACCGGCATTGATATGGATATCAACTATCGCTACACCATGCCGCCGGTGAAAGACAGTTCGCGGATGGATATCA
GCCTGAATAACCAGTTCCTGCAATCCTTCAACCTGAGCAGCAAACAGGAGGCGAACCGCCTGCTGCTGCGGATTCCGGTA
TTACAAGGTTTGCTGGATGGCAAAACGGATGTCTCTATTCCGGCGCTGAAACTGGGCGCGACCAACCAGCTGCGGTTCGA
CTTTGAGTATATGAACCCGATGCCGGGCGGTTCGGTGGATAACTGCATTACCTTCCAGCCGGTGCAGAATCATGTGGTGA
TTGGTGACGACTCCACCATCGACTTCTCGAAGTATTACCACTTCATCCCGATGCCGGATCTACGCGCCTTTGCTAACGCG
GGCTTCCCGTTCAGCCGGATGGCGGATTTGTCGCAAACCATCACCGTGATGCCGAAAACGCCAAACGAAGCACAGATGGA
AACCTTGCTGAATACTGTTGGCTTTATCGGTGCGCAGACGGGCTTCCCGGCGATTAACCTGACGGTGACCGATGATGGCA
GCACCATTCAGGGCAAAGATGCCGACATCATGATCGTCGGTGGTATCCCGGACAAACTGAAAGACGATAAGCAGATCGAC
CTGTTGGTGCAGGCGACCGAAAGCTGGGTGAAAACGCCGATGCGCCAGACCCCGTTCCCCGGCATTGTGCCGGACGAGAG
CGATCGCGCGGCAGAAACCCAGTCAACGCTGACCTCTTCCGGTGCGATGGCGGCGGTGATTGGCTTCCAGTCGCCGTATA
ACGACCAGCGCAGCGTGATTGCGCTGCTGGCAGATAGCCCACGCGGTTATGAAATGCTTAACGATGCGGTGAACGATAGC
GGCAAACGCGCCACCATGTTCGGTTCGGTCGCGGTGATCCGCGAGTCCGGTATCAACAGCCTACGTGTTGGCGATGTTTA
TTACGTAGGTCATCTGCCGTGGTTCGAGCGCTTGTGGTATGCGCTGGCAAACCATCCGATTCTGCTGGCGGTGCTGGCGG
CTATCAGTGTGATATTGCTGGCATGGGTACTGTGGCGTCTGCTGCGTATTATTAGTCGTCGTCGTCTTAACCCGGATAAC
GAGTAATTGAAGATGAATGTGTTGCGTAGTGGACTCGTGACGATGCTGCTGCTGGCTGCCTTTAGTGTTCAGGCAGCCTG
TACCTGGCCTGCCTGGGAGCAGTTTAAAAAGGACTACATCAGTCAGGAAGGGCGCGTCATCGACCCCAGTGACGCGCGCA
AAATCACCACCTCCGAAGGGCAAAGTTACGGCATGTTCTTTGCCCTGGCGGCTAACGACCGTGCAGCTTTCGATAATCTT
CTCGACTGGACGCAGAACAATCTCGCACAGGGTTCTTTAAAAGAACATTTGCCCGCCTGGCTGTGGGGCAAGAAAGAGAA
CAGTAAGTGGGAAGTGCTGGACAGCAATTCGGCCTCCGATGGTGATGTCTGGATGGCCTGGTCGTTGCTGGAGGCGGGGC
GTTTGTGGAAAGAGCAGCGTTATACCGACATCGGCAGCGCATTGCTAAAACGTATCGTGCGGGAGGAAGTGGTGACGGTG
CCTGGGCTGGGCTCCATGTTGTTACCGGGCAAAGTGGGTTTTGCTGAGGATAACAGCTGGCGTTTTAACCCCAGCTACCT
GCCGCCGACGCTGGCGCAGTATTTCACCCGCTTTGGCGCGCCGTGGACCACGCTGCGCGAAACCAATCAACGTTTATTGC
TGGAAACCGCCCCGAAAGGCTTTTCGCCAGACTGGGTGCGCTATGAGAAAGACAAAGGCTGGCAGCTAAAAGCCGAAAAA
ACATTGATCAGCAGCTACGACGCTATCCGCGTTTACATGTGGGTAGGCATGATGCCTGACAGCGATCCGCAAAAAGCGCG
GATGCTCAACCGGTTTAAACCGATGGCGACATTCACTGAGAAAAACGGTTATCCGCCGGAAAAAGTGGATGTGGCTACGG
GGAAAGCGCAGGGTAAAGGACCGGTCGGTTTTTCTGCCGCCATGCTGCCCTTTTTACAAAACCGCGATGCGCAGGCCGTT
CAGCGCCAGCGCGTGGCCGATAACTTTCCCGGCAGCGATGCCTATTACAACTATGTGCTGACCCTGTTTGGACAAGGCTG
GGATCAACACCGTTTCCGCTTCTCGACAAAAGGTGAGTTATTACCTGACTGGGGCCAGGAATGCGCAAATTCACACTAAA
CATATTCACGCTTTCCCTCGGTCTGGCCGTCATGCCGATGGTCGAGGCAGCACCAACCGCTCAGCAACAGTTGCTGGAGC
AAGTTCGGTTAGGCGAAGCGACCCATCGTGAAGACCTGGTGCAACAGTCGTTGTATCGGCTGGAACTTATTGATCCGAAT
AACCCGGATGTGATTGCTGCCCGTTTTCGTTCTCTGTTACGTCAGGGCGATATTGATGGCGCACAAAAACAGCTCGATCG
GCTGTCGCAGTTAGCGCCGAGTTCAAATGCGTATAAATCGTCGCGGACTACGATGCTGCTTTCCGCGCCAGATGGTCGTC
AGGCACTGCAACAGGCAAGATTGCAGGCGACGACTGGTCATGCGGAAGAGGCTGTGGCGAGTTACAACAAACTGTTCAAC
GGTGCGCCGCCGGAAGGTGACATTGCTGTCGAGTACTGGAGTACGGTGGCGAAAATTCCGGCCCGCCGTGGCGAAGCGAT
TAATCAGCTAAAACGCATTAATGCGGATACGCCGGGCAACACGGGCCTGCAAAACAATCTGGCGCTATTACTGTTTAGTA
GCGATCGCCGTGATGAAGGTTTTGCCGTCCTGGAACAGATGGCGAAATCGAACGCCGGGCGCGAAGGGGCCTCTAAAATC
TGGTACGGGCAGATTAAAGACATGCCCGTCAGCGATGCCAGCGTTCAGGCACTGAAAAAATATCTCTCGATCTTTAGCGA
TGGCGATAGCGTGGCTGCTGCACAATCGCAACTGGCAGAACAGCAAAAACAGCTGGCCGACCCTGCTTTCCGCGCTCGTG
CGCAAGGTTTAGCGGCGGTGGACTCTGGCATGGCGGGTAAAGCCATTCCCGAACTACAACAGGCGGTGCGGGCGAACCCG
AAAGACAGTGAGGCTCTGGGGGCGCTGGGCCAGGCGTATTCCCAGAAAGGCGATCGCGCCAATGCAGTGGTGAATCTGGA
AAAAGCCCTCGCGCTGGATCCGCACAACAGCAATAACGACAAATGGAACAGCCTGCTGAAAGTAAACCGCTACTGGCTGG
CGATCCAGCAGGGCGATGCCGCGCTGAAAGCCAATAATCCTGACCGGGCAGAACGGCTGTTCCAGCAGGCACGTAATGTC
GATAACACCGACAGCTATGCAGTGCTTGGGCTGGGCGATGTGGCGATGGCGCGCAAAGATTATCCCGCCGCCGAACGCTA
TTACCAGCAGACCTTGCGTATGGACAGCGGCAACACTAACGCCGTGCGCGGGCTGGCGAATATTTACCGCCAGCAGTCGC
CAGAAAAAGCCGAAGCGTATATCGCCTCGCTCTCTGCCAGCCAGCGGCGCAGCATTGATGATATCGAACGCAGCCTGCAA
AACGACCGTCTGGCACAGCAGGCAGAGGCACTGGAAAACCAGGGGAAATGGGCGCAGGCGGCAGCACTTCAGCGGCAACG
ACTGGCGCTGGACCCCGGCAGTGTATGGATTACTTACCGACTTTCGCAGGATCTCTGGCAAGCCGGACAACGCAGCCAGG
CCGATACGTTAATGCGCAATCTGGCGCAGCAGAAGCCCAACGACCCGGAGCAGGTTTACGCTTACGGGCTGTACCTCTCC
GGTCACGACCAGGACAGAGCGGCGCTGGCGCATATCAACAGCCTGCCGCGCGCGCAGTGGAACAGCAATATTCAGGAGCT
GGTTAATCGACTGCAAAACGATCAGGTGCTGGAAACCGCTAATCGCCTGCGAGAAAACGGTAAAGAGGCAGAAGCGGAAG
CGATGCTGCGCCAGCAACCGCCTTCCTCGCGTATTGACCTCACGCTGGCTGACTGGGCGCAGCAGCGACGTGATTACACC
GCCGCCCGCGCTGCATATCAGAATGTTCTGGCGCGGGAGCCAACTAACGCCGATGCCATTCTTGGTCTGACGGAAGTGGA
TATTGCTGCCGGTGACAAAGCGGCGGCACGTAGCCAGCTGGCGAAACTGCCTGCCACTGATAACGCCTCGCTGAACACAC
AGCGGCGCGTGGCGCTGGCACAGGCGCAGCTTGGCGATACCGCAGCGGCGCAGCAGACATTTAATAAGTTGATCCCGCAG
GCAAAATCTCAGCCACCGTCGATGGAAAGCGCGATGGTACTGCGTGATGGTGCGAAGTTTGAAGCGCAGGCGGGCGATCC
AACGCAGGCGCTGGAAACCTACAAAGACGCTATGGTTGCATCCGGTGTGACCACGACGCGTCCGCAGGATAACGACACCT
TTACCCGGCTGACCCGTAACGACGAGAAAGATGACTGGCTGAAACGCGGCGTGCGCAGCGATGCGGCGGACCTCTATCGC
CAGCAGGATCTTAACGTCACTCTCGAGCACGATTACTGGGGTTCGAGCGGCACCGGTGGTTACTCCGATCTGAAAGCGCA
CACCACTATGTTGCAGGTGGACGCGCCGTATTCTGACGGGCGGATGTTCTTTCGCAGTGATTTCGTCAATATGAACGTCG
GCAGTTTCTCCACTAATGCCGATGGCAAATGGGATGACAACTGGGGCACCTGTACATTACAGGACTGTAGCGGCAACCGC
AGCCAGTCGGATTCCGGTGCCAGCGTGGCGGTCGGCTGGCGAAATGACGTCTGGAGCTGGGATATCGGTACCACGCCGAT
GGGCTTCAACGTGGTGGATGTGGTCGGCGGCATCAGTTACAACGATGATATCGGGCCGCTGGGTTACACCGTTAACGCCC
ACCGTCGGCCCATCTCCAGTTCTTTGCTGGCCTTTGGTGGGCAAAAAGACTCTCCGAGCAATACCGGGAAAAAATGGGGC
GGCGTGCGTGCCGACGGCGTGGGGCTAAGTCTGAGCTACGATAAAGGTGAAGCAAACGGCGTCTGGGCATCGCTTAGCGG
TGATCAGTTAACCGGTAAAAATGTCGAAGATAACTGGCGCGTGCGCTGGATGACGGGCTATTACTATAAGGTCATCAACC
AGAACAATCGACGCGTCACAATCGGCCTGAACAACATGATCTGGCATTATGACAAAGACCTGAGTGGCTACTCACTCGGA
CAGGGCGGTTACTACAGTCCGCAGGAATACCTGTCGTTTGCCATACCGGTGATGTGGCGGGAGCGCACGGAAAACTGGTC
GTGGGAGCTGGGGGCGTCTGGCTCGTGGTCGCATTCACGCACCAAAACCATGCCGCGTTATCCGCTGATGAATCTGATCC
CGACCGACTGGCAGGAAGAAGCTGCGCGGCAATCCAACGATGGCGGCAGCAGTCAGGGCTTTGGCTACACGGCGCGGGCA
TTACTTGAACGACGTGTTACTTCCAACTGGTTTGTCGGCACGGCAATTGATATCCAGCAGGCAAAAGATTACGCACCCAG
CCATTTTCTGCTCTACGTACGTTATTCCGCCGCCGGATGGCAGGGTGACATGGATTTACCGCCGCAGCCGCTGATACCTT
ACGCCGACTGGTAAGTTTTCAGATAGCGCTTCTCTTAATGCCGCTGCGATCGGGTATACTCGGGCGGCAATCTGGGATTT
CCGGGGGGAGACAATTTGCGCGTAAGTCGCTCGTTAACAATCAAGCAGATGGCAATGGTGGCAGCCGTTGTCCTGGTGTT
CGTTTTTATTTTTTGCACCGTTTTGCTGTTCCATCTGGTCCAGCAGAATCGCTATAACACGGCTACGCAACTGGAAAGCA
TTGCTCGCTCTGTCCGCGAACCCTTATCTTCTGCCATTTTGAAAGGCGATATTCCCGAAGCGGAAGCTATTCTTGCCAGC
ATTAAACCGGCAGGCGTGGTCAGCCGTGCCGATGTAGTGCTGCCTAACCAGTTCCAGGCGCTGCGTAAAAGTTTTATTCC
AGAGCGTCCGGTGCCGGTAATGGTTACTCGCCTGTTTGAGCTACCGGTGCAAATCTCGCTGGGCGTTTACTCGCTGGAAC
GTCCGGCAAACCCGCAGCCAATTGCCTATCTGGTGTTACAGGCGGATTCCTTCCGCATGTATAAGTTCGTGATGAGCACC
CTCTCAACGTTAGTGACCATTTACTTACTTTTGTCGTTAATATTGACGGTGGCGATTAGCTGGTGCATTAACCGCCTGAT
TTTGCATCCGTTGCGCAATATTGCTCGCGAACTTAACGCCATCCCACCCCAGGAGCTTGTTGGTCACCAACTGGCATTAC
CGCGTCTGCATCAGGACGATGAAATCGGTATGTTGGTTCGCAGTTACAACCTCAACCAGCAATTGCTGCAGCGCCATTAT
GAAGAACAGAACGAAAATGCGATGCGCTTCCCGGTGTCGGATTTGCCGAACAAAGCCTTGCTGATGGAGATGCTGGAGCA
GGTGGTGGCGCGTAAACAAACCACCGCGCTGATGATCATCACCTGTGAAACCCTGCGTGATACTGCGGGTGTGCTGAAAG
AGGCGCAACGAGAAATTCTGCTGCTGACGCTGGTGGAAAAACTCAAATCGGTACTGTCGCCACGCATGATCCTCGCGCAG
ATTAGCGGTTATGACTTTGCTGTCATTGCCAACGGTGTACAGGAACCGTGGCACGCTATTACATTAGGTCAGCAAGTGCT
CACTATCATGAGCGAGCGCCTGCCGATTGAACGTATTCAACTCCGTCCGCACTGTAGCATTGGCGTGGCGATGTTCTACG
GCGATCTCACCGCCGAACAGCTTTACAGTCGCGCTATTTCTGCGGCATTTACCGCTCGCCATAAAGGCAAAAATCAGATT
CAGTTCTTTGATCCGCAGCAGATGGAAGCCGCCCAGAAGCGGTTGACGGAAGAGAGCGATATCCTTAATGCACTGGAAAA
TCATCAGTTTGCGATTTGGTTACAGCCACAGGTCGAGATGACCAGCGGTAAACTGGTCAGTGCGGAAGTGTTACTGCGTA
TCCAGCAACCGGATGGCAGTTGGGACCTGCCCGATGGCTTAATCGATCGCATTGAGTGCTGTGGGCTGATGGTTACCGTC
GGTCACTGGGTGCTGGAAGAGTCCTGTCGATTGCTTGCTGCCTGGCAAGAGCGCGGCATTATGCTGCCCTTGTCGGTAAA
CCTCTCAGCGCTGCAACTGATGCATCCAAATATGGTGGCGGATATGCTGGAACTGTTAACCCGCTATCGCATTCAGCCGG
GAACACTGATTCTGGAAGTTACAGAAAGCCGACGTATTGACGATCCTCATGCTGCGGTGGCAATCCTCCGTCCGCTGCGC
AATGCCGGAGTTCGGGTGGCGCTGGATGATTTCGGCATGGGCTACGCAGGGCTGCGTCAGCTGCAGCATATGAAATCGTT
GCCAATCGACGTACTGAAAATCGACAAAATGTTTGTTGAAGGTTTGCCGGAAGATAGCAGCATGATTGCTGCAATTATCA
TGCTGGCGCAGAGCCTGAACTTACAAATGATTGCCGAAGGCGTGGAGACTGAAGCACAACGCGACTGGCTGGCAAAAGCG
GGCGTTGGTATTGCCCAGGGCTTCCTTTTTGCTCGCCCACTCCCTATTGAAATCTTCGAAGAGAGTTACCTGGAAGAAAA
GTAGCTACCCCAAACTGATTACAAAACTTTAAAAAGTGCTGGTTTGTGCGAGCCAGCTCAAACTTTTTAACCTTTTTGTT
TCAATTATGATCCAGGTACATTTCTGTGATGTTGTCTGAGTGTTATTTTAAGGCCGCAGGTACCCCATAACCTTACAAGA
CCTGTGGTTTTACTAAAGGACACCCTATGAAAACCTCTCTGTTTAAAAGCCTTTACTTTCAGGTCCTGACAGCGATAGCC
ATTGGTATTCTCCTTGGCCATTTCTATCCTGAAATAGGCGAGCAAATGAAACCGCTTGGCGACGGCTTCGTTAAGCTCAT
TAAGATGATCATCGCTCCTGTCATCTTTTGTACCGTCGTAACGGGCATTGCGGGCATGGAAAGCATGAAGGCGGTCGGTC
GTACCGGCGCAGTCGCACTGCTTTACTTTGAAATTGTCAGTACTATCGCGCTGATTATTGGTCTTATCATCGTTAACGTC
GTGCAGCCTGGTGCCGGAATGAACGTCGATCCGACAACGCTTGATGCGAAAGCGGTAGCGGTTTACGCCGATCAGGCGAA
AGACCAGGGCATTGTCGCCTTCATTATGGATGTCATCCCGGCGAGCGTCATTGGCGCATTTGCCAGCGGTAACATTCTGC
AGGTACTGCTGTTTGCCGTACTGTTTGGTTTTGCGCTCCACCGTCTGGGCAGCAAAGGCCAACTGATTTTTAACGTGATC
GAAAGTTTCTCGCAGGTCATTTTCGGCATCATCAATATGATCATGCGTCTGGCACCTATTGGTGCATTCGGGGCAATGGC
GTTTACCATCGGTAAATACGGCGTCGGCACACTGGTGCAACTGGGGCAGCTGATTATCTGTTTCTACATCACCTGTATCC
TGTTTGTGGTGCTGGTATTGGGTTCAATCGCTAAAGCGACTGGCTTCAGTATCTTCAAATTTATCCGTTACATCCGTGAA
GAACTGCTGATTGTACTGGGGACTTCATCTTCCGAGTCGGCGCTGCCGCGTATGCTCGACAAGATGGAGAAACTCGGCTG
CCGCAAATCGGTGGTGGGGCTGGTCATCCCGACAGGCTACTCGTTTAACCTTGATGGCACATCGATATACCTGACAATGG
CGGCGGTGTTTATCGCCCAGGCCACTAACAGTCAGATGGATATCGTCCACCAAATCACGCTGTTAATCGTGTTGCTGCTT
TCTTCTAAAGGGGCGGCAGGGGTAACGGGTAGTGGTTTTATCGTGCTGGCAGCAACGCTCTCTGCGGTGGGCCATTTGCC
GGTAGCGGGTCTGGCGCTGATCCTCGGTATCGACCGCTTTATGTCAGAAGCTCGTGCGCTGACTAACCTGGTCGGTAACG
GCGTAGCAACCATTGTCGTTGCTAAGTGGGTGAAAGAACTGGACCACAAAAAACTGGACGATGTGCTGAATAATCGTGCG
CCGGATGGCAAAACGCACGAATTATCCTCTTAATCTCACCACTTATGCCCGCACTCCCTTCCCCGAGTGCGGGTGTTTGC
GCATAATTGACCCCTGTGCCTGAACTTACCACCTGGGTGAGTTCAGGTTTATTTCACTTCTTCCGTGACATTTTCATGTT
CTTGCGGTCTAACACGAAGTGTTTTTAACGTCATTTAGACTGACCGACAACGGGCAGTTTTTTTATTACCAGGATAGTTG
ATCAGGGGTTCACATGCAGGGCACAAAAATTCGACTTTTAGCGGGCGGTTTGCTGATGATGGCCACTGCTGGCTATGTGC
AGGCAGATGCGCTCCAGCCTGATCCAGCATGGCAACAGGGGACGCTTTCCAACGGTTTACAGTGGCAAGTGCTGACCACG
CCCCAGCGTCCCAGCGATCGTGTTGAAATTCGCCTGCTGGTTAATACCGGTTCGCTCGCCGAAAGTACACAACAGAGCGG
TTACAGTCACGCCATCCCTCGTATTGCGCTAACGCAAAGCGGTGGCCTTGACGCAGCGCAGGCGCGTTCATTGTGGCAGC
AGGGGATCGACCCTAAACGCCCGATGCCGCCAGTAATTGTCTCTTATGACACCACGCTGTTTAATCTGAGTTTGCCCAAT
AACCGTAACGACTTGCTGAAAGAGGCGCTCTCTTATCTGGCAAATGCCACTGGCAAACTGACTATCACGCCAGAAACCAT
CAACCATGCGTTGCAAAGTCAGGACATGGTGGCAACCTGGCCTGCCGATACTAAAGAGGGCTGGTGGCGTTATCGTCTGA
AAGGATCAACCTTGTTAGGTCACGATCCTGCCGATCCGCTGAAACAACCCGTTGAAGCGGAAAAGATTAAAGATTTCTAT
CAGAAATGGTACACCCCGGATGCAATGACGCTGCTGGTGGTGGGAAACGTGGATGCGCGCTCGGTCGTCGACCAAATCAA
TAAAACGTTTGGCGAACTGAAAGGCAAACGTGAAACACCGGCTCCGGTGCCGACGCTTTCTCCGCTGCGTGCGGAAGCGG
TGAGTATTATGACCGACGCGGTGCGTCAGGACCGGCTATCTATCATGTGGGATACGCCGTGGCAGCCGATTCGTGAATCA
GCCGCACTGCTGCGCTACTGGCGTGCGGACCTGGCCCGTGAGGCGCTGTTCTGGCATGTTCAGCAAGCGTTAAGCGCCAG
TAACAGTAAAGACATCGGTCTTGGATTTGACTGTCGTGTGCTGTATCTGCGTGCGCAGTGTGCCATCAACATCGAATCAC
CAAACGACAAGCTGAACAGCAACCTTAATCTGGTGGCGCGTGAACTGGCGAAGGTTCGCGATAAAGGTCTGCCGGAAGAA
GAGTTCAATGCGTTAGTGGCGCAAAAGAAACTGGAGCTGCAGAAACTGTTTGCCGCCTATGCGCGAGCTGATACCGATAT
TCTGATGGGGCAGCGGATGCGTTCGTTGCAAAATCAGGTCGTCGATATCGCGCCGGAGCAATATCAGAAACTGCGTCAGG
ATTTCCTTAACAGCCTGACGGTGGAGATGTTAAATCAGGATCTGCGTCAGCAGTTGTCGAATGATATGGCGTTAATACTG
CTGCAGCCGAAAGGCGAGCCGGAATTTAACATGAAAGCGTTGCAGGCGGCCTGGGATCAAATCATGGCCCCATCGACTGC
GGCTGCCGCCACATCTGTCGCCACGGATGACGTACATCCTGAAGTGACGGATATTCCACCTGTACAGTAATGCATGATGG
TGATGAGTTAGCACAACCATCAGGTATTTATGGATGAGCTGGATAGGGGGGTAACACTCTATCCAGCCTTTTGCATATGC
TGCTTTTACGCTGGCATCGCTTCACGCGGGATAATCGCGCCGCGATACTGAATAACGGTACTTGCGGTCAGGTGCCCGCG
TTTCGCTGCGTCTTCCGCACTGCCGCCCGTCAAACGTACCGCCAGATAACCGGCACTGAAAGAGTCGCCAGCTGCGGTGG
TATCGATCACTTTTTCTTTCGGCAGTTTTACCGCCGGAACATCCACTAACCCTTCGCCAGCAATGGACACCAGGCAAGAA
TCCGCCCCGCGTTTCACCACCACTTCTTTCACGCCCGCGTTATGGGTGCGCGCAATGACGTCTTCCACCGGCTGTTGACC
CCACAGCGCGTCTTCATCGTCCAGCGTCAGGAAGGCGATATCCGTGCATTCCAGCATTTGTTGGTACACCTGCTGTGTCT
CTTCTTTGCTGGCCCACAGGCGCGGACGATAGTTATTGTCGAAAATCACTTTTCCGCCGTTGGCGCGGCATTCGCGCAGC
AGGGAAAGCAGCTTTTCGCGGCTGGTCGGGCTTAAGATCGCCAGGCTAATCCCGCTCAGGTAGAGATAATCGAAATTCGC
CAGCTCTTCGCAAATCGCCGCGGATTGCTCACTCTCCAGCCAGAATTTGGCGGCAGCTTCGTTACGCCAGTAGTAGAACG
TACGTTCGCCGGTGCTGTCGGTTTCAATGTAGTAAAGGCCCGGCAGACGGTTTTCCATCCGTTGGGTCAGGGAAGTATCA
ACGTTCTCGCCGTGCCAGGCGTCCAGCATCTGCTGGCTAAAACTGTCCGTTCCCAGCGCCGTTACGTAATGAACGGTTAA
TGCCGCAGGATCGACCTGACGGGCGATATAGACGGAAGTGTTCAGGGTATCGCCGCCGAAACCGCGCTTAACGTCCGCGC
CTTTCTCGGAAAGCTCAATCATGCATTCGCCAATCACGGCAATCTTTTTGGACATAGTCGTGAACCTGATCTGTAAAAAA
TTAGCGTTAGTTTGCGCTGTGGTGGTTTGCTGGTCAACCATATTAAAACAGTGTTCCATTATTTTTTTGAGCCAGAACGT
ATTCCTGAAAGATTCCGTTGTGGAGTGGGGAAATTTACCCCGGCCAGGCGGTAAAGTTCTGCCCTTGCGCGCCGATAATC
TTTGTCGAGTCCGGGCAGCATCACTTTTAAACACAGGACATCTTTGATGATAAGGCAGGTTATCCAGCGAATAAGCAACC
CTGAAGCAAGCATCGAGAGCTTGCAGGAACGGCGTTTTTGGTTGCAGTGTGAGCGTGCTTACACCTGGCAGCCGATCTAT
CAAACATGCGGGCGGTTAATGGCCGTGGAGCTATTAACGGTGGTCACGCATCCCTTGAACCCTTCGCAACGCCTGCCGCC
GGATCGCTATTTTACTGAAATCACCGTTAGCCATCGGATGGAGGTTGTGAAAGAGCAGATTGATTTGCTGGCGCAAAAAG
CCGACTTCTTTGTAGAGCACGGCCTGCTGGCATCGGTCAATATTGATGGCCCTACGCTCATCGCCCTGCGTCAGCAACCA
AAAATCCTGCGCCAGATTGAGGATCTTCCCTGGCTGCGTTTCGAACTGGTGGAACACATCCGCCTGCCGAAAGATTCAAC
CTTTGCCTCGATGTGTGAATTTGGCCCGCTGTGGCTGGATGATTTTGGTTCCGGGATGGCAAATTTCTCTGCACTAAGTG
AAGTGCGTTATGACTACATCAAAATCGCGCGAGAACTGTTTGTGATGCTGCGTCAGTCACCGGAAGGACGCACACTCTTT
TCTCAGCTTTTACATCTAATGAATCGCTATTGTCGCGGGGTGATTGTCGAGGGCGTAGAAACACCAGAAGAGTGGCGTGA
TGTTCAGAACTCGCCCGCATTCGCCGCACAAGGCTGGTTTCTTTCACGCCCGGCACCGATAGAAACGCTGAATACGGCGG
TTCTGGCGCTATAAGCTGCCTCATTTTCCGCCTGGCTGGACTATCTTTAGGACTGGCACAGGAAGAATATGAGGAAGCGA
ACGATGAGCAAGGCAGGCAAAATAACCGCTGCGATTTCAGGGGCTTTCTTGTTGTTGATTGTCGTAGCGATCATTTTGAT
TGCAACTTTTGACTGGAATCGACTCAAACCGACCATCAACCAGAAAGTCTCTGCGGAGTTGAATCGTCCGTTCGCTATCC
GTGGCGATCTGGGCGTGGTGTGGGAGCGGCAAAAACAAGAAACTGGCTGGCGCAGTTGGGTGCCGTGGCCCCATGTACAC
GCGGAAGACATCATTCTTGGCAATCCACCGGATATTCCCGAAGTCACAATGGTGCATTTGCCGCGAGTAGAAGCGACGCT
GGCCCCGCTGGCGCTGCTGACCAAAACGGTCTGGTTGCCGTGGATCAAGCTCGAAAAGCCCGACGCGCGCCTGATTCGCC
TCTCCGAAAAGAACAATAACTGGACGTTTAATCTCGCCAACGATGACAACAAAGACGCGAATGCAAAGCCGTCGGCGTGG
TCGTTTCAGCTGGATAATATTCTTTTCGATCAAGGGCGGATCGCCATTGATGACAAAGTAAGCAAAGCGGATCTGGAAAT
TTTTGTCGATCCGTTAGGCAAGCCGCTGCCGTTCAGCGAAGTTACCGGATCGAAAGGTAAAGCGGATAAAGAAAAGGTGG
GCGATTACGTTTTTGGCCTGAAGGCGCAGGGACGTTATAACGGTGAACCGCTCACTGGTACGGGAAAAATAGGCGGTATG
CTGGCGCTGCGTGGCGAAGGAACGCCGTTTCCGGTACAGGCTGATTTCCGCTCTGGTAACACCCGTGTTGCTTTTGATGG
CGTTGTGAATGACCCAATGAAGATGGGGGGTGTCGATTTACGGCTTAAATTTTCTGGCGATTCGCTGGGTGATCTCTATG
AACTGACGGGCGTTCTGCTGCCCGATACACCGCCGTTTGAAACGGATGGTCGGCTGGTAGCGAAAATCGACACTGAAAAA
TCGTCGGTCTTTGATTATCGCGGTTTTAATGGGCGCATTGGCGATAGCGATATCCACGGTTCTCTGATCTACACCACCGG
CAAGCCACGACCAAAACTGGAAGGTGATGTCGAGTCGCGGCAATTGCGGCTGGCGGACCTGGGACCGTTGATTGGCGTTG
ATTCCGGGAAAGGGGCAGAAAAGTCGAAACGGTCTGAACAGAAGAAGGGTGAAAAAAGCGTTCAGCCTGCGGGCAAAGTG
CTGCCTTATGACCGCTTCGAAACCGATAAATGGGACGTCATGGATGCCGATGTTCGCTTCAAAGGGCGGCGCATTGAGCA
TGGCAGTAGCCTGCCGATTAGCGATCTTTCTACTCATATCATCCTCAAAAATGCTGACCTGCGCCTGCAACCGCTGAAAT
TTGGCATAGCGGGCGGCAGCATTGCGGCGAATATTCATCTGGAAGGCGATAAAAAGCCGATGCAGGGGCGGGCAGATATT
CAGGCTCGTCGACTGAAACTGAAAGAACTGATGCCCGATGTAGAACTGATGCAGAAGACGCTGGGGGAAATGAACGGTGA
CGCGGAACTGCGCGGTAGCGGTAACTCGGTGGCGGCGCTTTTAGGCAACAGTAACGGCAACCTGAAACTGTTGATGAATG
ACGGGCTAGTGAGCCGCAACCTGATGGAGATTGTTGGGCTGAATGTCGGCAACTACATTGTCGGTGCGATATTTGGTGAT
GATGAGGTGCGGGTGAACTGCGCGGCGGCGAATCTGGATATTGCCAACGGCGTGGCGCGCCCGCAGATTTTTGCTTTCGA
TACTGAGAACGCGTTGATTAACATTACCGGCACGGCAAGTTTTGCTTCGGAACAGCTGGATTTGACTATTGATCCGGAGA
GTAAAGGGATTCGGATTATCACACTGCGTTCGCCGCTGTATGTGCGTGGGACGTTTAAAAATCCGCAGGCTGGGGTGAAA
GCCGGGCCGTTGATTGCTCGCGGAGCCGTTGCGGCGGCACTGGCAACGCTGGTAACACCGGCGGCGGCGTTACTGGCGCT
GATCTCACCTTCCGAAAGGGAGGCTAATCAGTGCAGGACAATTTTGTCGCAGATGAAGAAGTGATGATAATTGCCGGATG
TCTGACATCCGGCAATTAAAACGACTACAACGACTGGTGCCGCGTCTCATGCGTTAACAGCAGGGCAATTAACGTCAGTC
CGGCCATCGCCGCCAGATATAACCCCACCGCGCCTAACCCATAGTTAGTCTGCAACCAGGCTGCGATATATGGCGCAACG
GAAGCCCCGAGAATCGACGATACGTTGTAAGAGAACGATGCTCCGGTGTAACGCACTTCTGTCGGGAACAGCTCTGGTAA
CAGCGCGCCCATCGGACCGAAGGTCAGCCCCATCAGACTTAACCCCAGCAGTAGGAAGGCAAAAACCAGAATCGGGTTGC
CAGAACCGAGCAAAGGGTTAAAGGCGAATAGCGCGAACAGGATGATCAGCGTGGTGATGATCACCATACTTTTACGGCGA
CCAAAAGCATCTGCCAGCAGACCCGCCAACGGAACCATCACTGCAAAACCGATAACCGCCATCATCAGCATCCACAACAC
TTCGTTACGCGGCAGGCCAAGCCCAACTGGCGCGGCGGCGGTACTAAAGGTCATAGAGTAGACCGTCATGATGTAAAACA
GCGTATAGGTTGCCAGCATAATGAACGTACCCAGTACGGTTACGCGAACATGTTTGGTCAGCAGCGTACCCAGCGGGATC
TTCACCTGTTTTTTCGCTTTAGCGACTTTCTCAAACACCGGCGACTCATGCAGCGACACGCGAACATACAGGCCGATAAT
GACCAGCACCGCCGAGAAGATAAATGGCACACGCCAGCCCCAGCTCATAAACTGCTCGTCGGTCAGTAGCCAGGAAAGCA
GCAAGAAAGTGCCGTTGGCAAAGAAGAAGCCAATCGGTGCGCCCAGCTGCGGGAAGGAGCCGTACAATGCACGTTTGCGC
GGTGGGGCGTTTTCAGTCGCCAGCAGCGCTGCGCCGCCCCATTCACCACCTAAGCCCAGACCCTGACCAAATCGAGCCAG
CGCCAGCAGCAGCGGGGCGAAAATACCAATCGTGGCATAGCCTGGCAGCAGACCAATCACCACGGTCGAAATCCCCATCG
TTAGCAACGAGGCGACCAGCGTCGCTTTACGCCCAACGCGATCGCCAAAATGACCAAAAACGGCAGAGCCAATGGGGCGC
GCGACGAAGGCGATGGCGAAGGTGGCGAGCGACTGTAGCGTTGCTGCCGTTGGATCGCCCTGCGGGAAGAAGATATGCGG
AAACACAATAACGGCCGCAGTGGCGTAAATGTAAAAGTCGAAGAACTCAATGGCCGTGCCAATGAGAGAGGCGACAAGGA
CTTTATTACGCGAGTTGATCGGCGTGTATTCTTGCTCGTGGTCGAGTGTTGTGGCTGTTGCTTGCATAATCTTTTCTTAT
TTTTTGGCTAACGAATAGCCATATTACGCACAGCAAAAGTGATATTTCAATGTGTAACAAATCGCGGAAATGGTCAAAAA
TCAGGCAAAAAGGGGATAATGTTTAGGCCAGTGATTTTTCTTCTATGAAATGCTTCACATAATTTTATAAATGGTGGATT
AAACTGGTTTTAGGTTAAATAAAAGTTACCAACTGGATTTATATGCTGGGGTTATGAGTTGGAATGAAATTGTTTGCTCC
TGAATAGATGGCTAAAGAGGCTCTGGGAAAGAGTTTCAAGAGGTTATGTGCGCATTATAGCCGGATGCGATGCTGGCGCA
TCTTATCCGGCCTACGGGGAGCCAGGCCGAATAAATTCGTACGCCGCATCCGGCCTATTTTAAGGCTGCGTTTTCCCCGG
CATTCGCGGGTCGTCTTTATATTCGGCGGTGGCAATCCACGCCGCGCAAAACAGCGTCAAACGGGCGAAGAAGTAGAAAA
ATGCCATCAGCCCCAGCACGGAACCAAATGCTGCGCCAGAGGGTGATTTCATCAACGATGGCAGGGTGTAGGTCATCACG
ATTTTAATCACTTCAAAACCAATAGCAGCCAGAAATGTTCCGCGGATCAGGGCTTTTTTGCGCGGACGGTGGCGCGGCAA
CCGCCAGAAGATCCAGAAGAAAAGCAGATAGTTGGCGAAGATGGAAATCGCCAGGCCAATCAACCGCCATGTCGGTTTCA
GCCACTCAATGCTGTTCAGGTGCAGGGCGCTAATAATCATTTGCTGCGCAGAACCGGCAACCGAGGTGATAGAAAGCGTC
ACAATCAGCGCAATCAACAAACCAATCAGCGAAATAAAATCACGCAGATATTTTACCCAGAACTTCTCCTGATCTTGCGG
CGAGCGTTCCCAGACATCGCGTGACTGGGCGCGAATCGCTTCACGCAGGTTACCCATCCAGTTGATGCCGGAATAAAGCG
CCACTGCCAGACCGACAAGCCCTACAGTCGTACGCTGCTGAACGGCGGTGTTGATGGTGTTTTTCAACGTGGCGGCTAGC
GTCGGATCGCTAATGTTTTGCAGAATTTTGTCGAAGATATCCTGTAGCAACATCGGATGGGAGGCCAGCACAAAGCCCCC
TGCGGCAAACGACACCATCAAAATGGGGATCATCGACAAAAATGAGAAATAGGTGATAGCCGCCCCAAACTGGTTACCCA
GCCGATCGTTAAAGCGTTCTGTCGCGCGAATCAGGTGCGCAATAACCGGTTGGCGTTGGACTTTCTCGGCAGTGGTGGTG
ACGGTTTCCAGCGCCTGGCTAACTTTGCCGCCTTTCTCGCTATTATCCAACTGCTTAATCGGCTCGTGCTCCAGATCCTG
GGTGGGACGTTTGATCTCGTTTTCCTGCGTCATCCGCTCTTTTGTCCTTCTGTCGTGGTTATTCTTAAAAAGTATAGTCG
GTCAGTCCAGGTGCTCTTTCATTACGCCAGCCAGCCACTGCATAAACAGGTTTACACGCCGGGAAAGCTCCCGACGCTGC
GGATAAACCAGTGAAAGGGACAGCGGCTCGGCACGGTAGCCAGGCAACACTTCAATAAGCCGCCCGGCACGCAGGGCTTC
GCGCACGGCAATGCGCGGGATCTGAATAATCCCCAGACCGGCAAGACCGGCGGCGAGATAGTTTTCGCTACTGTTTACCG
TCAACATGCCGCCAGACTTAAACCACTGGACGCCATTAACGCTGGCAACCTCAAAACCTAACGGATGTACACCCAGGTGC
GGTGTATAACGCACTATTGCGTGTGAAGTCAGATCATCGGGGCTTTGCGGATAACCAAAGCGCGTCAGATAGTGTGGACT
GGCACAGTTGACCATGGTCAGTTTGCCGAGAGAACGGGCGATAACGCCATCTTCCGGTAATGCGCCAGTGCGTATCACGC
AATCAAAACCATCATGAAGAATATCTACCGGACGGTCATGGCTACTCAGTTCCAGCTCAATTCCCGGATGCAGATAGAGA
AATTCCGACAAGTGCGGCAGTAACAGGCTTTTCGCGATTCCTGACGGGATGTCGATGCGTAATTTACCGCTGATACTGGT
GGCATCCTGTTGAAACAGACCGTCCAGTTCGCTGAGATTACTCAACACATCTTTTGCTCGTTGATAATAGGTCATGCCTT
CTGGCGTGAGTTTGACCCGTCGCGTGGTGCGCTGGAGAAGCTGGGTGCCAAGTTGATGTTCCAGTGCCTGTATCTGGCGC
GAAACACTTCCCTTTGGCAAAGCAAAGAAATCCGCCGCGCGGGAAAAACTTTCCAGCTCCGCGACTTTGATGAACAACTG
CATTGCGTGAATTTTATCCATTTCTTTGACCGATTGTTGTTCACAACGAAACAGTAGCGCGCATATCGCATTGTTTATTG
TTTTTTCTAACATCTAATGCCGGGTTTCACAATGTTGTCATGATGAATGTGGCGATTTCTCAGCAGGAAAAGGGAGGAAT
AGCTTTATGAGAAAGGTGAATTCCCTTAAACAGAGCGTATTTTTCAGCGATTCCCTTTAAAGTGAATAGAAGATGTATTG
GCTATTTGTGCTTATTTTTATCTCATTGCCGTTTGTTATTTTTGTTTATGGTCGCGGAATTTCATTTTTAATTGCATGCG
TACTAACTACCGATATAAGGAAATCCTCAAAAATGTTTTAAATAGTGCCCTCGACATATAATTTCAGGCGTTTAGCTGTA
ACTATTTATATCGGTAACTATTTTCTACGCGTCATCTCTGTAGAATGGCCACCGCCAAATGGCGAATTCTTATTTTTTCT
CGCGGGTAATACCCTTCCACTACTTAAGTCTTTTTAACGTATTCAGGTGGAGATTCAGTTATGCAAATAGTCATGTTTGA
CAGGCAGTCAATATTTATTCATGGAATGAAAATCAGTTTACAGCATCGTATTCCAGGAGTGAGTATTCAGGGGGCCAGTC
AGGCAGACGAGTTATGGCAAAAGCTGGAAAGTTACCCTGAAGCCTTAGTGATGCTCGATGGCGATCAGGATGGTGAGTTT
TGCTACAGGTTGCTGCAAAAAACCGTGGTGCAATTTCCTGAGGTTAAGGTGTTAATTACGGCGACGGATTGCAACAAACG
GTGGTTACAGGAAGTTATTCATTTTAATGTGCTGGCCATTGTGCCTCGTGATTCAACCGTCGAGACATTTGCGTTGGCGG
TCAATAGTGCGGCGATGGGGATGATGTTTCTGCCTGGAGACTGGCGAACGACGCCGGAAAAGGACATTAAAGATCTCAAA
TCGTTAAGCGCCCGCCAGCGGGAGATTTTAACCATGTTAGCGGCGGGCGAATCAAATAAAGAGATCGGCAGGGCGCTGAA
TATCAGTACCGGAACGGTAAAAGCGCATCTGGAATCACTGTATCGCCGTCTGGAAGTCAAAAATCGCACCCAGGCGGCAA
TGATGTTAAATATCTCCTCCTGAAGAGGATAATTTTACAGCCAGCAGGAAGTTAGCGGCTGGCTGTAAAAATATTATGGT
TCGCCGTACAAACCAATTAAACGGCGTACCACACCGTTAGTCCAGCCAAACCCATCCTGCAACGGATACTCGCCACCGCC
GCCTTCGCGAGGAACACCATCGGCAATATGGTATTTCTCGATCAGTTTGTGCTGTTCCAGATAGAACTGATTCACCGTCT
TCAGCCAGTTGCGCGCGATTTCATCACCCAGAAGGTCATCGCCGTACATCTTAAATCCCTGAATTGCCATCCATTGTAAC
GGTGCCCAGCCGTTGGGTTTATCCCACTGTTCACCGGTTTCGTACTCGCTTGCCAGAATCCCGCCAGGTGTCAGTAACCG
GCTGCGCACGGCGTTTGCCAGACGATCGGCCTGTTCATGGTTCGCCATACCGACATAGAGCGGCACAATGGCGGCAGCGG
AAAACAGCGCCAGTTGCTCGCGTCGCCAGTCGTAATCGCGGTAGATGCCGTTTTCATCATCCCAGAGGTAACGGTTTACC
GCATCGCGACGGGCACTGGCCTTCTGGCGGAACAGTGCTTCTGTCTCTTTCTCGCCTTTCAGCGCCGAGATGTTGGCGAT
GGCGCTCTCCAGTTTAAACAGGAAGGCATTCAGATCGATGGGGATGAACTGGGTGGTACGAATGCTCGCCAGACGACCAG
TATCACGCAGCCAACGGGAAGAGTAATCCCAACCGGAGGCCGCCCCCGCACGTAAATCGCGGTACACCTCGTTGGGCGGG
CGACCAGAATGTTTCGCGGTTTCAACGTCCTCAAGCCAGGATTCGTCACGCGGCGTGTCGCGATCGTCCCAGTAACGGTT
GAGCAGCGAGCCGTCCGGCATCCGCACAACATGGCGATAGGCCTGATTAGGGATCAACGATTCTGCACCGTCCATCCAGA
AGGCATATTCCATTTTCAGGTGGTCGAGATAGCGGCGCGCGCCGCGTACACCATCTTCTTCAAACAACTCCACCATCAGC
GCAAAAACCGGTGGTTGCGAGCGGCTCAAATAATAGGTGCGGTTGCCGTTGGGGATGTGGCCGTAGTTTTCGATCATCCA
GGCGAAGTTATCGGCCATGCATTTCAGCAAATCTTCCCGACCACTTTCCGCCAGCCCCAGCATGGTGAAATAGGAATCCC
AATAGTAGGTTTCGCTAAAACGGCCGCCCGGGACAATATATGACTGCGGCAGCGCCAGCAGAGAAGACCACGGAATGTGA
TCCTGTGGTTCACGGGTTAGCACCGGCCACAGCTGGTCGATATGCTCTTTCAGGGAATTTTGCGGGTCCGATACATACTC
GCTGGAGTAGACCTCCGGCAGCCAGAAGTGGTTTTCAACAAACTTGCGCAAGTCAAAATCACGATGACGGCGCACTTTAC
GGTAGCGGATTAAAATATCCAGCGGGTCCATTTTGGGTGCGCAGTCGGGAAAGGTTTTACTGTCGGGGAAAATTTTCGCC
GACTGAACATGCTCGAACAGTTCGAGATAGCGATCGGCAGGCGTCAGCGCATCAGAGGCGGGCAGCCCTTCAATCATCTC
GGGTTCCGGTTCTGCCTCGATCATCTCATCCAGTTTTAATTCATACGGGTCCAGCTCATAGCAGAGATCGACCTCGATCA
TGAGTTCGTCTGGATTAGGGTTTTGAATTTTCTGATTGAGCATAAGGATCCGACCTCCGAAATTCGTCGCTAATTATCGG
GCTTTTCTTTAAGGGTAGTCATTCGCTCCGCCTGGTGGGCGACAAAGCGTGCGGTGGATCACGTTTATTAACCTGCCAAA
AAATATAACGCACTAATATCAATGGAATTTATAAAAATACGGATTTCGTGTTGTTTTTCATTTTCAGAACATTCAATCCT
GCTCTCGCCGCAATCATGATATGCCATTCCTGAGCTGGATAATAGGCACTGGCTATCTTATTGATAGTTTATATTCATGT
AATTGATTGATTCCTATCAAAAAGCATATCTCCCTGTTTTTTATGATGGCTTTGTCTCGCAGAGACGTTTGCAGCATTCT
GGAAAATTTTCTGGGTCACAATAACTCACCACCGTGAGGGAAGAATAATGAAAATGGTCTCACGTATTACCGCGATCGGC
CTGGCTGGCGTCGCGATTTGCTATTTAGGGTTATCTGGTTATGTGTGGTACCACGATAATAAACGCAGTAAACAGGCCGA
TGTTCAGGCATCTGCTGTCAGTGAAAATAATAAGGTTTTAGGCTTTCTCCGTGAAAAAGGATGCGACTATTGCCATACAC
CTTCGGCAGAATTACCCGCCTATTATTATATTCCCGGCGCGAAACAGTTGATGGATTACGACATAAAGCTTGGATATAAA
TCTTTTAACCTCGAGGCCGTGCGTGCGGCTCTGCTGGCTAATAAACTCGTTTCGCAAAGCGATCTGAATAAGATTGAATG
GGTGATGCAGTATGAAACTATGCCGCCAACGCGTTATACCGCGCTACACTGGGCGGGTAAGGTGAGTGATGAAGAGCGGG
CGGAAATACTGGCCTGGATTGCAAAACAGCGTGCGGAATATTACGCCAGCAATGATACTGCTCCGGAGCATCGCAATGAA
CCGGTGCAGCCCATCCCGCAAAAACTGCCTACCGATGCGCAAAAAGTGGCGTTGGGTTTTGCGCTGTATCACGATCCCCG
TTTATCGGCTGATAGCACCATTTCATGCGCTCATTGCCATGCGTTGAATGCGGGGGGCGTCGATGGCAGAAAAACATCGA
TTGGTGTTGGTGGCGCAGTTGGGCCGATTAACGCGCCGACGGTATTTAACTCAGTATTTAACGTTGAGCAGTTCTGGGAT
GGTCGTGCGGCAACATTGCAGGATCAGGCTGGTGGACCGCCGTTGAACCCGATTGAAATGGCGTCGAAATCCTGGGACGA
AATTATTGCTAAGCTGGAAAAAGATCCGCAGCTTAAAGCGCAGTTCCTCGAAGTCTATCCGCAAGGTTTCAGTGGCGAAA
ATATTACTGATGCCATTGCTGAATTTGAGAAAACATTAATTACGCCGGATTCCCCATTTGATAAATGGTTGCGTGGAGAT
GAGAATGCTCTGACGGCACAACAGAAAAAAGGCTATCAATTATTTAAAGATAATAAATGTGCAACTTGTCATGGTGGTAT
TATTCTCGGCGGACGTTCCTTTGAACCGTTGGGGCTGAAAAAAGACTTTAACTTTGGTGAAATTACGGCGGCGGATATTG
GTCGTATGAATGTTACTAAAGAAGAGCGTGATAAATTGCGTCAGAAAGTACCCGGTTTACGTAACGTTGCTTTAACGGCA
CCGTACTTCCATCGCGGTGACGTGCCGACGCTGGACGGGGCGGTGAAACTGATGCTGCGCTATCAGGTAGGCAAAGAGCT
GCCGCAGGAGGATGTGGATGATATCGTCGCTTTCCTGCACAGTCTGAACGGGGTTTACACGCCGTATATGCAGGATAAAC
AATAATTAATTTGATCGCCCGAACAGGAGTGTTTGGGCGATTTTTATTACGATAATAAAGTCTGTTTTTAATATTATCAT
ATTAAATGTTTATATTATAAAAAGTCGTTTTTCTGCTTAGGATTTTGTTATTTAAATTAATCCTGTAATACCTTGCTTCC
ATTGCGGATAAATCCTACTTTTTTATTGCCTTCAAATAAATTTAAGGAGTTCGAAATGGACCAGAAGCTGTTAACGGATT
TCCGCTCAGAACTACTCGATTCACGTTTTGGCGCAAAGGCCATTTCTACTATCGCGGAGTCAAAACGATTTCCGCTGCAC
GAAATGCGCGATGATGTTGCATTTCAGATTATCAATGATGAATTATATCTTGATGGCAACGCTCGTCAGAACCTGGCCAC
TTTCTGCCAGACCTGGGACGACGAAAACGTCCATAAATTGATGGATTTGTCGATCAATAAAAACTGGATCGACAAAGAAG
AATATCCGCAATCCGCTGCAATCGACCTGCGTTGCGTAAACATGGTTGCCGATCTGTGGCATGCGCCTGCACCGAAAAAT
GGTCAGGCCGTTGGCACCAACACCATTGGTTCTTCCGAGGCCTGTATGCTCGGCGGGATGGCGATGAAATGGCGTTGGCG
CAAGCGTATGGAAGCCGCAGGCAAACCAACGGATAAACCAAACCTGGTGTGCGGTCCGGTACAAATCTGCTGGCATAAAT
TCGCCCGCTACTGGGATGTGGAGTTGCGTGAGATCCCTATGCGCCCCGGTCAGTTGTTTATGGACCCGAAACGCATGATT
GAAGCCTGCGACGAAAATACCATCGGCGTGGTGCCGACTTTCGGCGTGACCTACACCGGTAACTATGAGTTCCCGCAGCC
GCTGCACGATGCGCTGGATAAATTCCAGGCCGACACCGGTATCGACATCGACATGCACATCGACGCCGCCAGCGGTGGCT
TCCTGGCACCGTTCGTCGCCCCGGATATCGTCTGGGACTTCCGCCTGCCGCGTGTGAAATCGATCAGTGCTTCAGGCCAT
AAATTCGGTCTGGCTCCGCTGGGCTGCGGCTGGGTTATCTGGCGTGATGAAGAAGCGCTGCCGCAGGAACTGGTGTTCAA
CGTTGACTACCTCGGCGGTCAGATTGGTACTTTCGCCATCAACTTCTCCCGCCCGGCGGGTCAGGTGATTGCACAGTACT
ATGAATTCCTGCGCCTCGGTCGTGAAGGCTATACCAAAGTACAGAACGCTTCCTACCAGGTTGCCGCTTATCTGGCGGAT
GAAATCGCCAAACTGGGGCCGTATGAGTTCATCTGTACCGGTCGCCCGGACGAAGGCATCCCGGCGGTTTGCTTCAAACT
GAAAGATGGTGAAGATCCGGGATACACCCTGTACGACCTCTCTGAACGTCTGCGTCTGCGCGGCTGGCAGGTTCCGGCTT
TCACTCTCGGCGGTGAAGCCACCGACATCGTGGTGATGCGCATTATGTGTCGTCGCGGCTTCGAAATGGACTTTGCTGAA
CTGTTGCTGGAAGACTACAAAGCCTCCCTGAAATATCTCAGCGACCACCCGAAACTGCAGGGTATTGCCCAGCAGAACAG
CTTTAAACACACCTGATAACATCACGTTGTAAAAACCGAATGCCCAACCTTTAAAAACAGGTGGGTATTCGGCTACTTAT
TAATTGCAATAATATATTACCTGTCTATTCATCGTGTTGATAAGATATATGTTATATGAATGTTATGGAGCATAGCGATA
CTGCTTAATATTACGATGATGAATTATTTGCTTACTATTAATTCCTCTTCGTTCTTAAGTCCCCTTTTTATATAATAAAT
CCAGTCATCCAGCCCGAGTATCATCGCTCATTATCATCCTGTTTTCCCGCTTCGTTTAAATTTATTTATCAATCAATTTG
ACTTAAGAGGGCGGCGTGCTACATTAATAAACAGTAATATGTTTATGTAATATTAAGTCAACTATGCAACCACTACATGG
TAATTGTCTAATTGCGTACGCAAGACATAAATATATTCTCACCATGGTTAATGGTGAATATCGCTATTTTAATGGCGGTG
ATCTGGTTTTTGCGGATGCAAGCCAAATTCAAGTGGATAAGTGTGTTGAGAATTTCGTATTAGTTTCAAGAGACACGCTT
TCATTATTTCTCCCGATGCTCAAGGAGGAGGCATTAAAACTTCATGCACATAAAAAAGTTCCTTCATTACTCGTTCATCA
CTGTACCAGAGATATTCCTGTTTTTCAGGAAGTTGCGCAACTATCGCAGAATAAGAATCTTCGCTATGCAGAAATGCTAC
GTAAAAGGGCATTAATCTTTGCGTTGTTATCTGTTTTTCTTGAGGATACGCAATTTATACCGTTACTTCTGAACGTGTTG
CAACCGAATATGCGAACACGAGTTTGTACGGTCATCAATAATAATATCGCCCATGAGTGGACATTAGCCCGAATCGCTAG
CGAATTGTTGATGAGTCCAAGCCTGTTAAAGAAAAAATTGCGCGAAGAAGGTACGTCATATTCACAGTTGCTTACTGAGT
GTAGGATGCAGCGTGCTTTACAACTTATTGTTATATATGGGGTTTCAATTAAGCGAGTTGCAGTATCCTGTGGATATCAC
AGCGTGTCGTATTTCATTTACGTTTTTCGAAATTATTATGGGATGACGCCCACAGAGTATCAGGAGCGATCGGCGCAGGA
ATTACCGAACTGTGGCCCGGCGGCAAGTATGGCTGCGCAAGGGAATTTTTACGGCACTGACCGTTCTGCGGAAGGAATAA
GATTATAGAGTTTTACTCAGACATAAAAAAAACCCGGCATAGGGGACCGGGAAGAGGATAGTCTGCCGTCTCCAGACTAA
TAAACCGTTATAACACTCCCTGTTGGCACGGGAAACTTTGTGCTCTCAGTAAGTTAAATATAACTTTTACTGGAAATAAG
ATCAGCCATTTTTTTATAAACATAAGCTATACGCTGTGTGAAAATATAATCGTGTTGCATTTACTTATTATCAATTAACT
GTTATGCAAAACTACTTTGTGGATAAAATTTGGTCCTACCAAATATGGCAGTTTTTGCACACAGAAACAGTCTGGCGTCA
TTTCATTAGTATACTGACATTGAAATAATCGCAGTAATGAAATATAAGGAATAGTCATGACTCATGTCTGCTCGGTGATC
CTCGTTCGTCGTTCATTCGATATTCATCATGAACAGCAAAAAATATCGTTGCATAACGAGAGTATCCTGCTGCTGGATAA
AAATTTGGCAGACGATTTTGCGTTTTGTTCACTGGATACGCGACGGCTGGATATCGAAGAGCTGACAGTTTGCCATTACT
TACAAAATATTCGTCAGTTGCCACGCAATTTAGGATTGCATAGCAAAGACCGTTTGTTAATTAACCAGTCACCCCCCATT
CAGCTGGTGACGGCGATTTTTGATAGTTTCAATGACCCCCGGGTCAATTCGCCGATACTGAGCAAAATGCTCTACCTTTC
CTGTTTATCAATGTTTTCTCATAAGAAAGAACTGATCCCCTTACTTTTCAATAGTATCAGTACTGTTTCAGGAAAAGTTG
AACGCCTTATTAGCTTTGATATCGCTAAACGTTGGTATCTACGCGATATCGCAGAAAGAATGTACACCAGCGAGAGTCTC
ATCAAAAAAAAGTTGCAGGATGAAAATACCTGTTTCAGTAAAATATTACTCGCCTCCAGGATGTCGATGGCCAGACGATT
ACTCGAGTTACGTCAAATACCTCTGCATACTATTGCGGAAAAATGTGGCTATAGCAGTACGTCATACTTTATAAATACAT
TTAGACAATATTATGGTGTAACGCCACATCAGTTTTCGCAACATTCGCCGGGTACCTTTTCCTGACATATTTCGCATTTG
AATATTGGTCAGGATCTCACGTCTGCTTCATGTGAAACTCTTTCCTGATGATTTCTGACGAGCTACCGGCTAGTTCTCTT
TCGCAGTTTGCCAGGCGGTATAGGTATTTTCAGGAGGAAAAGACTCGGCATGTTTGGGATTATTAAGCTAACAATTCATA
CGATTACGGGAATGTGGGTCAGTATTGTGCTGTTCAAATTGATGACGAATGGCTGGAGTGGTTTCTACTTTCAGTGCTGT
GTACTAAGCCTGGTATTCCTGACGGTTAGCTGGTTGTTGAGTGGTGAATGGTTAGCAGGAAAGAGTAAGGCTGAACCTTC
ACGTTCAACCTTACTCTCATTTACACGTTACGCTTTTTTAAAGCGGGCAAAGAGATGTTCCACTACAACGAAAAAGACCG
GAACGAAGTAAATTGCCAGCACTGTTGCGGCAAACATCCCGCCCATTACGCCGGTACCTACCGCGTTTTGCGCGCCAGAG
CCGGCACCATGACTGATAACCAGCGGCAGCACGCCGAGAATAAAGGCCAGAGAAGTCATCAGGATTGGGCGTAAACGCAT
ACGCGCTGCTTCGATGATTGCCTCTACCGGCGTTTTCCCTTCTTTCTGCATCATCTCAACGGCAAATTCGACAATCAGGA
TGGCGTTCTTGGCGGAAAGCCCGATGGTGGTCAGCAAACCAACCTGGAAGTAAACGTCATTACTTAAGCCGCGCAGATCG
GTGGCCAGTAATGCGCCAACGACGCCTAACGGAACAACCAACATCACCGAGAACGGAATTGACCAGCTTTCATAAAGTGC
GGCGAGGGCGAGGAACACCACGACCAGTGAAATGGCATATAGCGCGGGAGCCTGGTTTGAGGATAACGCTTCCTGATACG
ACAGCCCGGTCCATGAGTAGCCGACGCCTGCCGGAAGTTTTGCGACCAGGTCTGCCATAAATTTCATGGCGTCACCGGTA
CTTTTCCCGGCAGCCGCTTCACCTAAAATCTCCATTGACGGGATGCCGTTGTAGCGTTCCAGTCGCGGTGAACCATAGGT
CCATTCGGTAGACGAATAGGCAGAAAGCGGTGCCATCGTGCCAGAGGCGTTGCGTACATACCATTGGTTGATGTTATCCG
GCAACATACGGAACGGCGTGCCTGCCTGGACATACACTTTTTTCACCCGCCCCTGGTTGAGGAAGTCGTTCACGTAGCTG
CTGCCGAAGGCGGTGGAAATTGTCTGGTTGATATCAGACAGCGCCACACCCATAGCCTCGGCTTTCGCAGCGTTGACGTT
CACTTTGAACATCGGCGTATCTTCCAGGCCGTTCGGGCGTACCCCGATGACCTGATTCGGTGATTGCGCTGCCAGTGATA
ACAGCTCGTTTCGCGCCTGGGTCAGCTTTTCGTGCCCCAGATTGCCGTTGTCCAGCAGTTCCATATCAAAACCTGACGCG
GTACCCAGTTCAGCCACCGCGGGTAAGTTGAACGGGAAGACGACGGCTTTATTGATACTGCTTAGCGCAATCATTGCCCG
CTGAATAATCGCGGTAACCGAGTTTTCCTCGCCGACACGTTCAGACCACGGCTTGAGGCTGATAAACGCCAGACCGTTGT
TTTGCCCCTGACCACTGAAGCCAAAGCCACCAACGGTAAACACCGACTGAACATTATTTTTCTCTTTTGTCAGATAATAA
TCCGTCACCTGTTGTAGCACTTTCGTGGTGTTAACCATGGTTGCACCGGAAGGTAACTGCGCGGTGGTCATAAATACCCC
CTGATCCTCTTCTGGTAAGAAAGAGGTCGGCGTACGCAGGAACAGCACCGCCATCCCGGCGCAAATCAGCAGGTAGACCA
CCATGTAGCGACCGGTACAACGCAACAGCGAGCGGGTGCTGTCGGTATAGTGCTGAGTTGATTTTTCAAACAGCGTGTTG
AAGCGTGCGAACAGGGCGTTAGGTTTGTGACCGCCCTCCGGCGCGGCTTTCAGAATGGTGGCGCACAGGGCAGGGGTCAG
GCTCATTGCTACAAATACTGAAAGCAGCATGGAGGAGATCAGCGTGATGGAGAACTGGCGGTAGATCTCCCCGGTCGCAC
CGCTCATAAAGGCCATCGGCATAAACACTGCGGAAAGAACAACGGCAATCCCGACCAGCGCACGTTGGATCTGCCCCATC
GATTTATGCGTCGCTTCCTTCGGCGGTAGCTTATCTTCCGCAATGACACGCTCGACGTTCTCCACCACCACGATGGCGTC
ATCCACCAGTAACCCTATCGCCAGCACCATCCCGAACATAGTTAACGTGTTGATGGTGAAACCGACCGCCGACAAGATCG
CAAACGTCCCGAGAATAACCACCGGTACGGCAATCGTCGGGATGATTGTGGCGCGGAAATTCTGCAAAAACAGATACATG
ACCAGGAAGACGAGGATGATAGCCTCAACCAGCGTTTTGAAAACTTCCTGAATAGAAATTTTGATAAACGGTGTGGTGTC
GTAAGGATAAACCGTCTTCAGGCTTGCAGGGAAATAAGCCGATAAACGGTTCAGCTCCTCTTTCACCGCTCGCGAGGTAT
CCAGGGCGTTTGCTCCGGTAGCCAGTTTGATGGCGATCCCGGCAGCAGGTTTGCCGTTATAGCGCGCCACGGTGGAATAA
TCTTCCGCCCCAAGTTCGACGCGGGCGACATCACGCAGCAGCACTTGCGAACCATCTTGCTGAACTTTCAACAGGATTTT
GCCAAATTCTTCCGGCGTTTGCAGACGCGTCTGCACAATGATCGAGGCGTTCAGTTGCTGGTCTGCCGCCTGTGGCATGC
CACCCAGTTGACCACCGGAAATCTGGTTGTTTTGCACCTTAATCTGGGAAATAACATCGGAAGGTACCAGGTTATATTTA
TTGAGTTTTTGCGGGTCCAGCCAGATACGCATGGCGTACTCGGAACCAAAGAGCTGTACGCTACCAACGCCCGCGGTACG
GCTTAGCGGGTCTTTGATATTAGACGCTACATAGTCCGCGATATCGTACTGGTTGAGGCTGCCGTTATCAGAAATAAATG
CCGCTACCATCAGGATATTACTGCTCGACTTATCGACGCTAATCCCCTGCTGCTGCACCGCTTCAGGTAATGAAGGCATA
GCGAGTTGCAGTTTATTTTGCACCTGAACCTGTGCGATATCAGGCGATGTCCCCGTCTCGAAGGTCAGAGTGATGGAGGC
ATTACCTGCCGCATCGCTGGTTGAAGACATGTACATCAGGCCATCAAGCCCATTCATATTTTGCTCAATCACCTGAGTGA
CCGAGTCTTCTACCGTTTGCGCATCGGCACCCGGATAGGTTGCGCTGATGGTAATGGTCGGTGGCGCAATCTGCGGATAC
TGCGCAACCGGTAAGTTCATGATCGCCAGACCGCCTGCAAGCATCATAATAATGGCAAGTACCCAGGCAAAAACCGGGCG
ATCAATAAAATAGTTAGCCATGAAAGTCCCCTTAAGCCTGCAACGTTATTGTTTCGATTCGGTGCTGGCGTTTTCCTGGC
TGGAGGAAATTGCACGTGCTTTGATACCCGGACGAATGCGTTGCAAACCGGAAACGATCACCCGATCGCCAGCCTGCAAG
CCAGAGGTGACAACCCACTGGTCGCCGATGGCTTTGCTGGCTTCGATTTCGCGTAGCTGCACGACATCGTCTTTATCCAG
AATGAGTGCCGTTGCTTTACCCTGGGCGTTGTGGGTGACGCCTTCCTGCGGCACCAGTAATACATTCTGGCGGCTACCTT
CATCCACTAATGCCGTGACATACATGCCAGGCAGCAAGTCACCATTTGGGTTGGGGAAAATCGCCCGTAACGTCACGGAG
CCCGTGGTTTCATCCACCGTCGGGTCGGAGAATTTCAGCGTGCCGGTCTGGCCGTAACGTTTACCATTTTCCAGATTGAG
CTGTACTGGCGTACTGCCCTGAACCTGTTTGATTTGCCCACTGGCGACCTCTTCTTTCATGCGCAAGAAATCCTGCACCG
ACTGCGTGAGATCGACATAAATCGGGTCCAGACGTTGTACGGTAACCAGCGAATCTGCCTGATTAGCGGTAACGAGTGCG
CCGACGGTCACCGACGATTTCCCGCTGACGCCCGTAATCGGCGAGGTGACATTCGCGTATTGCAGATTGATCGTCGCCTG
TTCAACAGCCGCTTTGGCGACGGTGACATTGGCTTCTGCTTCATTCAACTGGGTGCGCGCGGTGTCGTAATCCTGACGGC
TAACATAGTTGGTCTTCAGCAACGATGCCTGGCGGTTAAAGGTGATGCGGGCATTGCTGGCGGTAGAGAGCGCTTTCGCC
AGCGAGCCTTTGGCGGAGTTCAGCTCTGCCTGTAAAGGCGCAGGATCAATCTGATACAGCGAATCGCCCTGGTTCACTTT
ATCGCCTTCGATAAAGTTGCGTTTAATGATAATACCGCCCACCTGGGGACGTATCTCGGCAACTTCATAAGGAACGGTTC
TACCGGGCAATTCGCTCAACACATTGACCGAACCGGGGGAGAGTGTGACGACACCGACCTCAGGCGTCATGGCGGCGGCG
TTTTCCGCCGATTTGTCATCGCAGGCGGTGAGCATCGCGCCGCAGAATAACAACGGTATTAACAGTTTTCTTCTTCTGTT
CATTTTAGTCCCTGAAAATTCTTGAGAAATAACGGTTCTTTAAATTGCGCGCGAGGAGAGATATGAGGGATTTACAGACC
AGCGGCATAGTGGGGTTGTCAGCCAGTAAGATGGGATGCAAGCACAGTGATCGACATGGTGAGGTCAACGACAAAAAAAA
TGTTGCCGTTCTGCCAACAGTTTCTGCCAGCATTCGGGCAACGAAGGGTTCTACTGGTGGATACACATACCAGGGGAATA
AAGTCGTTTTCGTCTCTCCTTCAATAATCACCGGGGGTATTGAAATCAGCATCTGCATCCCTCGTCATGCCAGCCATCAA
TTTCAGTTGCTTATGTCCTTACTAAAAATAAGATGTGATACCCAGGGTGACGATGTCGCTCATACGTCTTAATTTCAGCT
TGTACATAATGTTGAATTTCTGAATCTTTAATGTTTGTTGCGAAATGTTGAGCGTTGACGTGATATTGCTTTCATTTTTG
TTTTTCAGAATCAGTTGCATAATTTTGAACTGATTATGTGAAAAACATAGTTGTGAATTCTTATGGGGCAAGTGTTTACC
ATAAGTAATCTCAAGAAGATTTTTGATACTTTCTTTACGGCTGACAAAATAAATAGGCGCTTTAGCTTTTAGTTTACTGA
TGTGATAAGGTGCCAAAACAATAATTCTCTCGGCATCTAATTTCTCCAGGAATTTAATCGCTTCTTCATCAAGGATATGG
TTGTGATAGGTGTCAATGATCACCTTGAAGGGTTTATTGCCTACTTTTTTGATCTCTGACAGGGAATTGATTTTTATCAT
TTCGTGATTATCTTTCAACTGCCAAAAGCCCTGTAAAAGAAAAGAATCTTTCGTCATGAGAAAAATCATAACTTGCTCCT
TAGCCGTTATCGTTTCGAACATGTCATCCTTTCCATTATTTACATCCTTGTCCGAATCGTTGTTCAATATAGTAAACGCC
TATAAGAACTTTGCCCTTCGTGAACTAATACGTCTATTAACACTAATCAATACTTCAGATTTATCCATCACGCACTCCAT
ATATTGGTCCTAAGTAAGATTCCTGGTTGTTATCAATTTGTAACTAGTAAACAAAAGGTTAACTTTTGCGGATTGCTGCC
CAAGAATAAGTTATCAATAACCAGTTTGTGATCTCTGAAGAATATTACTAAAGTTAAAATGTAATCCGATTTAAATATCG
AGTCTCCTTGTTTCGACTTAGGCTGGCAATTGGATTGCCAGCTTTCTTTTAACGCATTAAAATTACCTGATTAAATAACT
CATTCATGTCTTCAGGTTTTTATATAGCGTCTGGAGACACGGATATTTATGCAATGTAATCAACGCCAGTTGCAAAAAAA
TGAACCCGGATTGCTTATTTAACCGCCCATAGCATCAACGCTTACGGAACTCTTTGTTCACTTTCCCACAGCACTTTTAA
AACATTAAACCTGACCACGGAAAATATCAGCCATGATAATGTTTGAAATGGCTAATTTGCCATGGAACGAAAAAAATCAG
ATTAAATTCAGTAGGTTGAAATAATCAACAGCAGGCAATTGTTTCAATGATAGTGCGTAATTGAACTGAAACACTGTATA
GCTAAGAGAGTATTAACTGGATCATAGTCACTTAATGTGACTATGATCCAGGTGGAAATAGGGATAATTATTGCTTTTTA
ACGAACAAACTGGCGAAGCTGAACAGACTGGCGGCGCTAAATATCAGTTCAATTCCCACCAGTGTGGAAACCAGCGTTAC
CGACACCATCGGCGTAGCACCAAGGAATATCCAGGCAATGACGATATCCAGCACACCAATAACGAGCTGTAGCCAACTGC
CTTTCATTGAACGCTGACGATACCAACTCATCAGGCGAATAACCCCTGCCACACAGAACAAACCGGCAATAAATGCCGCA
ATGGCAAAAATGCCCAGCTCTGGTGCACGGATGAAGAAATAGCCGATCAATAAATAGGCGACTGCGACGAGGAAACCGGA
TAATACCGGCCAGAAATTATGACTGCGGTTGCTGAATAGCCCGACAATAAGCGCAATGCCCGAGCAGATTAATAATGCAC
CCACTACTGTGCTTAAAATGTCGCCAGAGACGAACGGAAAACTGATACACAGCAACCCGACGATAAACAGCAGCACGGCA
ATAAACTGGATTGCTCTGCGATGTTTTTTAAGCATCTCCAGATCAAACTTCAAAATTGTTGCCTTATCTATATATAACAT
AGAACCACCCTATAAAATTAAGAAGAAAATCCCCTGCTATCAATCTATGCCAAAAACGCGTCTAAGAATGCAGTCGATTT
AATAAAAATTTCCTAATTACAGTATCTGATGCATCTGTAACTCATTGTATTGAAATAAAAATATCTGATTTTGATATTTT
CCATCAACATGACATATACAGAAAACCAGGTTATAACCTCAGTGTCGAAATTGATTCGTGACGGCTCTTTCACTTTATAG
TTGAGGATATTACGATGAAAAAAGTATTAGGCGTTATTCTTGGTGGTCTGCTTCTTCTGCCAGTAGTGAGCAATGCAGCG
GATGCACAAAAAGCAGCTGATAACAAAAAACCGGTCAACTCCTGGACCTGTGAAGATTTCCTGGCTGTGGACGAATCCTT
CCAGCCAACTGCAGTTGGTTTTGCTGAAGCACTGAACAACAAAGATAAACCAGAAGATGCGGTTTTAGATGTTCAGGGTA
TTGCAACCGTAACCCCAGCTATCGTTCAGGCTTGTACTCAGGATAAAAAAGCCAGCTTTAAAGATAAAGTTAAAGGCGAA
TGGGACAAAATTAAGAAAGATATGTAATTCCGGGAATGCGTTACATCGTATTTCCTTGCATATTGAACAGGCCGGAATAT
CTTCTTTAAAAGCAGCTATTCCTCCTGTTTGTATATAATCTCTATATTGAATGGGTTACAAAATGAACATTTCATCTCTC
CGTAAAGCGTTTATTTTTATGGGCGCTGTAGCGGCTTTGTCACTGGTGAACGCACAATCTGCGCTGGCAGCCAATGAATC
CGCTAAAGATATGACCTGCCAGGAATTTATTGATCTGAATCCAAAAGCAATGACACCAGTTGCGTGGTGGATGCTGCATG
AAGAAACAGTATATAAAGGTGGCGATACCGTTACTTTAAATGAAACCGATCTCACTCAAATTCCTAAAGTGATCGAATAC
TGCAAGAAAAACCCGCAGAAAAATTTGTATACCTTCAAAAATCAAGCATCTAATGACTTGCCGAATTAATAAGGTACAAG
TAAAAAGGAGTAGCAAGTTGAGCCATCTTGCTGCTCCTTTTTGCATTTTTATATGACAGCAGAATTTATTATACGACTTA
TACTTGCGGTAATTGCCTGTGGCGCTATTGGCATGGAAAGGCAAATGCGCGGCAAAGGAGCAGGGTTACGTACACATGTA
TTAATTGGCATGGGAAGCGCCCTGTTTATGATTGTTTCGAAATATGGTTTTGCTGACGTGCTGTCTTTAGGTCACGTCGG
ACTGGATCCCAGCCGTATTGCTGCTCAGGTTGTGACGGGCGTCGGGTTTATCGGTGCAGGTAACATTCTCGTTCGTAACC
AAAATATTGTAGGTCTGACGACGGCAGCGGATATCTGGGTGACCGCAGCCATTGGTATGGTTATTGGCAGCGGTATGTAC
GAACTGGGTATTTATGGTTCAGTGATGACCTTGCTGGTGCTGGAAGTCTTCCATCAATTAACCTTCCGCCTGATGAACAA
AAATTACCATTTACAGCTGACATTAGTGAACGGTAATACGGTATCAATGCTCGACTGGTTTAAGCAGCAAAAAATAAAAA
CGGATTTAGTTTCGTTGCAGGAAAATGAAGATCATGAAGTGGTCGCCATTGATATCCAGCTTCATGCCACAACGTCGATA
GAAGATCTGTTGCGATTATTAAAAGGTATGGCAGGGGTGAAAGGCGTTTCAATTAGCTAATCTGTATAGTTATTTATTCG
CAGGAGTACCAGGGCGGTACTCCTGTTGGTTTTAATGATCGAGGACGATCAGTGGTGAATGGTTGGCAGGATCTTTAAGT
ACGGTAATATCCGCGCCGTAGAGCATTGTCAGCGCCTGCTGTGTCAATACGTCCTGCGGCTTACCATTTGCGATAACCTT
TCCTTTTTGCATTAATACAACACGGTCTGCATAACGCGCGGCAAGATTTAGATCGTGCAATACGCAGCAAACATTGAACT
GCCGTTCGTGAACTAACTGGCGTAATAAACGAAACAAGTGCTGCTGATGGTGAATATCCAGCGCCGAAGTTGGTTCATCA
AGAAATAACCATTTCGGTGAGGGAGTAGGTTCCCAGAGTTGCACCAGCAGGCGCGCTAATTGCACGCGCTGTTGTTCACC
ACCGGATAATTGCCGATAGTCGCGGTTTGCTAACGCCTGACAGTCACATAACGCCATTATTTGTGCTGTTTCATTATCCT
GATTACCAGTACGATGCGGATGCCGCCCCATCTGGATAACTTCTTGTACGCTGAATGGAAACGCCATGTGGCTATTTTGA
CGCATCACGGCCCGGTGTTTCGCCAGTTCAGTAATCGACCATTCATTTAATGGCTTATTAAACAACCAACATTCGCCGCT
ATCAGGTTGAAGATAGCCGGTTAGCTGGCGAAGCAGCGTAGATTTTCCCGCACCATTAGGGCCGAGGATGGCAACAATTT
CCCCACCGGGAAAAGTCAGCGAGACATTATCAGTCAGACGCCGCCCCTGAAGGCTATAAACCAGATTCTGGGCGCTGATC
ATGTGATCCTCCGGTTGCGCAGAATCAACCACATAAAATAAGGGCCACCAAGCAGGCTGGTTAATAATCCCACGGGCATT
TCTGCTGGCTGTACCAGCGTGCGGGCAAGCGTGTCTGCCATCAGCAATAAACAGGCTCCGGCGAGGGCGGAACAAGGGAT
TAGCCAGCGGTGATTTGCCCCGGTAGTCATGCGAATCAGATGCGGGATCACCAGGCCAATAAAGCCGATAATGCCGCTTA
CCGATACGGCAGCACCAACGAGCAGTGAGCTCACTAACAGTAATTGCTGGCGTTTACGCTTCACGTTCACGCCGAGGTAG
TGGGCTTCTTCATCACCGAGCTGCAGTAAATTCAGCGTTCCGGCGAGACAAGTTGTTGCGATAATGGCCGGTAGGATGAA
TGAACTGGCAACCAATAACGTCGGCCATTGCGCCTGTCCAAGATTGCCCATCATCCACAATGTGAGTTGTCGTAGCTGCT
GCTCATCGCCGATATAGCTCAGGATGCCGATCGCTGCGCCGCACAGGGCATTGATGGCGATACCGGCGAGTAATAATTGC
ATCATGCTGCCATCGCGATGGCGCTGCGTGATGAGAAAAATGATGGTGCAGACCACTAAACTTCCGGCAATGGCAAACAC
CATTTGCTCATAGAGCACCAGCACCACTGGGAAGGAGAAGGGCAGCACAATAGCAACGCCAACCATTAATGCAGAACCGC
TACTGACGCCAAGTAATCCAGGGTCAGCCATTGGGTTGCGAAAAAGCCCCTGCATAATTACCCCTGCGGTTGCCAACGCT
GCACCTACCAGCACCGCCAGCAAAACCCGTGGTAGACGAATATTGAGCCAGATATCGCGGTATTCCTCATCAAAAAGGGC
ATCAAAACTGATCTTTAACGCTCCCTGACTGGCACTGAACAGCACCAGAGCGAGCAATAATAGTGATAGCCCCATAAAGA
TCCTGGCGGAAGAGAGTGAATCCTTGAGCACGCAAAACTCCGTTACGACATTACGGCGCGGATATGCCGCGCCGGGGGAT
CACGCCGGTTTCAGGTCCGGTTCAATCAGACTGTAGACCTGCTGGTTAAGTGCTGGCGCATTTGCCAGTTCATGGATATG
TGCGGCGACATCAGCACGGTTAACAAAACCATGACACTCCTGATTTTGTATCCGTTGTGCTTTGCCCGTTGCCGCACCAT
CAAGCAGACCGCCGGGGCGGAGAATGGCATAATCAAGCTGGCTGGTTTGCAACCAGGTTTCCGCCAGCGTTTTTTCCCGT
ACCGCCTGACCAAACGCAGCCTTTGCCCGCTCTGATAAAAACGGCCAGCTATCGCTGCATCCCAAAGAGGTCACCAGAAT
CATGCGACTGATGCCAGCCTTCTCGGCCTCATCAATCACTGTTCTGTGCGCCAGATAATCCTGAGCTCCGCCCATTGTTG
AGATGATAAGCGCATCCGGGCCAGCTGCGCGGCAAGCAGCCGCGACTACGCTGGCATCACAGGCGTCGCCTGTAAAAACC
TGTACGCCTTGTTGCGCCAGTTTCATGGCGGCATTGGCATGACGAATGACAGCAACGACCGGACGTTGTTCCGCCAGCGC
CAGTTCAAGCGTTCTGGCACCCACACCTTTTCCGCCTGCGCCAAAGAGTAGCCACGGTGTCATCAGGCGTGTTCCTTTAA
CGATGCTGCCAGAGCATGGAAGGCGCTGACTTGTTCGCTCAGGAGCTGACGATGATCATCCCTACCGAGGAAGATTTTCA
GCATTGCGCTGCCTTCCTTATTGAAAAAGAGAATAGAGGCGGTGTCCATGCCCATAAATTTACGTTCGATCAAGGCAATA
TGCGTGCAGTTTTCTGCTTTGATATGCCCGGACATGCCGTGCTTTCCGCGTAGGTTGAAATAGCCGTGGCGATGGAAACC
CGAAGGCAGTTCGCCGCTAAATTCGAGTATTATATCGGTAGTATGTACTAACGTGGTGACGTTGCCCCATTCGCAGACGG
TATCCCAGACAGTATCGAATTTATCACCTGGCACAACAGTCGGAGAGGGCAGATTTTTCACTACCTCCAGCAGCGTGGTG
TTGTATTGTTCGGCGATCGCCTCCAGCGTACCGTCTGGCTCCGTTTTCAAAAATTCCTGTAACGAGACATGGCTCATAAA
TCACTCCTGTTATGGTTTTTCAAGCGCAATTGCTGGCGCATTAAGTACCTGAATCAGTTCATTAAGAGACTGCAAAATGT
TGCTTGCCCAGAAACGACCTTCATTGGTCAACCGCAGACACGTTGACGCATCGCGGCTTAAGCCTTTTTGGTGCCACTGG
GCCAGTAACGGCGCGAGTTTTTCGGCATGTGGCGTAAGTTCGTCCAGCGGTACACGCGCCGTTTCAATGCCCGACTGCAA
GGTATGACGCCACTGCGCGTTACGTTCGGCGTTACGCATGATCATCATCAGCGGTTTTTTGCCTGCTGCGACGGATTCAT
GCCAGGTCTGAAGATTGCGTTCGTTCATCCAGGAGTAACCATTAATCGAACCGCCGGCTCCGGAACCAAAGGCCAGACAA
TCGGCACCTTGTTTAATCAGCAGGTTATAGAGATTGCGTTCGCGTGTGGTACGGCCCCAGTGGCTGTTACTGATGCAGCG
CCAACCGGCATCGTCCATAAAATCACACCCTTGCAGGTAAAGATCGCGACGTTCTGCCGGAGAGGGCACGGTAGTACGCC
CATTTTCCACGGCTTTGCCCAGCGGTGTATTGGGCAGGACATTGAGCGCATAGAGATCGACGCCGTCGAGACCGATATCG
CGGGCAATAGCCAGATCTTCTCCCCAGGTTTGCGCATCCTGACCCGGCAGACCAAACAGCAGGTCACAGACCACCGCGGC
ACGATCGCGTTTGACCAGGCTTTCCATAAACGCAATAGCGGTTGGGCCATCCGAGGTGCGGGCCATTTTCTTGCGGATTT
TGCTGTTAAACGACTGAATACCAATTGAGAAGCGGTTTGCTCCTGCATCAAGGCAAGCATCGATTCGCTCAGCGTCAAAA
TTCAGTACCCGGCCTTCAATAGTGATTTCACAATCAGGGGCCAGTGGCAGCTTTTCTCGTAATGTGGTGATGATTCTGGC
CAAATCGTGTGCTGAAAGCGCGGAAGGCGTACCGCCACCGAAATAGACCGCGTGGATGGGGGCAGACTGATGCAATACGC
TGTCTGCTTCCAGTTCTATTTCACGAATCAGGGCGTCGGTATAATGAGCACACGCATCTTCATTAAAACGGTTCTGATAA
AAACCACAAAACGTGCAGTGTGTCGCACAAAAAGGAATGTGTAGGTAAACCAGTCGCTTACGTGGTGATACCGTTTGATT
GATCATCTCTTGCCAGGTCTGTGCCAGTTGCTCTTTGGCAACCGGAATGGCCCCACGAAACGGCATCATGGCGCGCCTGT
CTTTAAATGGCTGATCACCGTCTAAAGCAAAATGTGGCGTGAGATCCAGGGTGTTATTTGTGTTCATTCGTCTGATTTAA
ATCCATTTATTGCGGCCAAAGCTGCTGGTGTAAAGACTCAACGACATCAGCAATACGCGGACCCATTCCCAGAATCAGGT
TTTGATCAACGGTGATAATGCGCTGGTTTTTCCAGGCGGCAGTGTGGGTAATTCCGGCAATAGAACGTAGCCGATTAATA
TCGCCATCGACCATTTGTGAGGTGACGACAATCACTTCAGGGTTAGCCGCAATCAGCGATTCCGCGCTGTAGCTTTTGTA
CTGCTGGTGGGTAGCGACGTTTTCTGCTCCGGCAAGCGAAAGAATGGCGTCCGCGACGCTGCCTTTACCGGCAACCTGTG
GCGCACTTCCGCCTGCGGAGAGAATAAACATGGCTTTAACCGGGGCTTTTTTGGCCGTCACGTTTTGCTGTACTCGCTCC
AGGCGTTGGTTGATCTGTGTCACCAGCGCCTCGCCTTGTTCAGGAACCTGTAACGTTTTTGCCAGTTGGCGAATGTTGGC
GTACATCTGCTCAAGGGTGGCTGGTACACGCGGCAGAGTGACGACGTTGACTTTTTGCGCCCGCAGTTGGTCGAGCACAA
TTTGCGGTCCTGCATCCTGCCAGGTAATTACGCTATCCGGGCGAAGTGACAAAATGCCTTCGCTGCTGAGTTGTTTCCAG
TAACCAATATGCGGCAGTTTGGCGGTTTCTGGTGGATAAGATGTCGTTTCATCGACACCAACCACGCGTTTGCCAGCGCC
CATCGCGTAGATTAGCTCCGTCAGCGATCCTCCTGCGACCACGATACGTTCGGCAGCCGTTACGCTAAAAGTCCAGCTAA
AAGCCAGTAATGCCGTAAACAATTTTTTTCGTTTTACCATGGTCTTCGCGGCAGAGGCCACGGCTGAAATACATAACGTT
AGTGGGGAAAAAAGAAACGGCCTGGTGATGATCCTTGGCATAATGTGAGAACTCTTATCAAATTGAGAATGATTATGATT
ATCATTTGAGTTATATATGAAATACAACCGTCGATTCAATACGCACGGCGTTACAAGCGTATTTATTTTTGATTTTTATC
AAGATGCTTCGTCAGCTAATGTTCTTGTTACCGATTAAATTTCAGCGCGGGAAAAAGCTGAGAACCCGGAGATATCGCGG
CTTGCAGAGCAAAGAGAAGAGAAAATTATCACTGTTAACGACAACGTTTTGTGATGAGGTTGTGGGGGGATAGCCATAAA
CACAGGATGGTTTTCTGGATGCTGGATAGATTTCATAACCCCCTGTTTATTGCGTTAATGGCGGTTAAAAAAAGCTTGAT
CATAAAAAATTGATCGATAATAATTCTCATTATCACGTTTGAGTTTAACAAAATATGACATCATGGATAACAAAATCATA
TCTTTTGTAAGGGAAAACGCACAGCACTCTTCACTTCAGACGTGGCGTACTACTTTGCCTGACAAAGAGGGCGTGCTTTT
GCTGAATTATCAGAAATATTCGGCAATTTTACGGGATATATACGCTAATAGCTTCCCGTGGTGATATCTAATCATTTGAA
TTGTAAATAAATTTATTTTTCGCCAGCCACCCCGGTATTAACCCAGGCAGCCAGCATTTTTTATTTTCCTCATGGAGAAT
CGCTATGTCACGTCCGCAATTTACCTCGTTGCGTTTGAGTTTGTTGGCTTTGGCTGTTTCTGCCACCTTGCCAACGTTTG
CTTTTGCTACTGAAACCATGACCGTTACGGCAACGGGGAATGCACGTAGTTCCTTCGAAGCGCCTATGATGGTCAGCGTT
ATCGACACTTCCGCTCCTGAAAATCAAACGGCTACTTCAGCCACTGATTTGCTGCGTCATGTTCCTGGAATTACTCTTGA
TGGTACCGGACGAACCAACGGTCAGGATGTAAATATGCGTGGCTATGATCATCGCGGCGTGCTGGTTCTTGTCGATGGTG
TTCGCCAGGGAACGGATACCGGACACCTGAATGGTACTTTTCTTGATCCGGCGCTGATCAAGCGTGTTGAGATTGTTCGC
GGACCTTCAGCATTACTGTATGGCAGTGGCGCGCTGGGTGGGGTGATCTCCTACGATACGGTCGATGCAAAAGATTTATT
GCAGGAAGGACAAAGTAGTGGTTTTAGTGTCTTTGGTACTGGCGGCACGGGGGACCATAGCCTGGGATTAGGCGCGAGCG
CGTTTGGGCGAACTGAAAATCTGGATGGTATTGTGGCCTGGTCCAGTCGCGATCGGGGTGATTTACGCCAGAGCAATGGT
GAAACCGCGCCGAATGACGAGTCCATTAATAACATGCTGGCGAAAGGGACCTGGCAAATTGATTCAGCCCAGTCTCTGAG
CGGTTTAGTGCGTTACTACAACAACGACGCGCGTGAACCAAAAAATCCGCAGACCGTTGAAGCTTCTGATAGCAGCAACC
CGATGGTCGATCGTTCAACAATTCAACGCGATGCGCAGCTTTCTTATAAACTCGCCCCGCAGGGTAACGACTGGTTAAAT
GCAGATGCAAAAATTTACTGGTCGGAAGTCCGTATTAATGCGCAAAACACGGGGAGTTCAGGCGAGTATCGTGAACAGAT
AACAAAAGGAGCAAGGCTGGAGAACCGTTCCACTCTATTTGCCGACAGTTTCGCTTCTCACTTACTGACATATGGCGGTG
AGTATTATCGTCAGGAACAACATCCGGGTGGCGCGACGACGGGCTTCCCGCAAGCAAAAATCGATTTTAGCTCTGGCTGG
CTACAAGATGAGATCACCTTACGCGATCTGCCGATTACCCTGCTTGGCGGAACCCGCTATGACAGTTATCGCGGTAGCAG
CGACGGCTACAAAGATGTTGATGCCGACAAATGGTCATCTCGTGCGGGGATGACTATCAACCCGACCAACTGGCTGATGT
TATTTGGCTCATATGCTCAGGCATTCCGCGCCCCGACGATGGGCGAAATGTATAACGATTCTAAACACTTCTCGATTGGT
CGCTTCTATACCAACTATTGGGTGCCAAACCCGAACTTACGTCCGGAAACTAACGAAACTCAGGAGTACGGTTTTGGGCT
GCGTTTTGATGACCTGATGTTGTCCAATGATGCTCTGGAATTTAAAGCCAGCTACTTTGATACCAAAGCGAAAGATTATA
TCTCCACGACCGTCGATTTCGCGGCGGCGACAACTATGTCGTATAACGTCCCGAACGCCAAAATCTGGGGCTGGGATGTG
ATGACGAAATATACCACTGATCTGTTTAGCCTTGATGTGGCCTATAACCGTACCCGCGGCAAAGACACCGATACCGGGGA
ATATATCTCCAGCATTAACCCGGATACCGTTACCAGTACCCTGAATATTCCGATCGCTCACAGTGGCTTCTCTGTTGGTT
GGGTCGGTACGTTTGCCGATCGCTCAACACATATCAGCAGCAGCTACAGCAAACAACCTGGCTATGGTGTGAATGATTTC
TACGTCAGTTATCAAGGGCAGCAGGCGCTCAAAGGCATGACCACTACTCTGGTATTGGGCAACGCCTTCGATAAAGAGTA
CTGGTCGCCGCAAGGCATCCCACAGGATGGTCGTAACGGAAAAATTTTCGTGAGTTATCAATGGTAATCATCTGCCCCGA
TATTTCGGGGCATTTATCTGGAAGGAAGAGAGACAATGAACCACTACACACGCTGGCTTGAGTTAAAAGAACAAAATCCC
GGAAAGTACGCGCGTGACATCGCAGGTTTAATGAATATCAGCGAAGCAGAACTGGCATTTGCACGCGTCACGCACGACGC
GTGGCGGATGCGCGGCGATATTCGTGAAATTCTGGCGGCGCTGGAAAGCGTTGGTGAAACCAAATGTATTTGTCGTAATG
AATATGCAGTCCATGAGCAAGTTGGCTCGTTCACAAACCAGCATTTGAACGGACATGCCGGATTGATCCTCAATCCGCGC
GCGCTGGATTTACGTCTGTTTCTCAATCAATGGGCCAGTGTTTTCCACATCAAAGAAAACACGGCTCGTGGCGAACGCCA
GAGTATTCAGTTCTTTGATCATCAGGGCGATGCATTACTAAAAGTTTATGCCACCGACAATACCGATATGGCGGCATGGA
GTGAGCTTCTGGCACGGTTTATCACCGATGAGAATACGCCGCTTGAGTTAAAAGCCGTTGATGCGCCAGTTGTTCAAACG
CGAGCCGATGCCAGTGTGGTCGAGCAAGAGTGGCGGGCGATGACCGACGTTCATCAGTTTTTTACGTTGCTCAAGCGCCA
CAACCTGACGCGCCAACAGGCGTTCAATCTGGTGGCAGACGATTTGGCCTGCAAAGTATCCAACAGTGCGTTGGCGCAAA
TTCTTGAATCTGCACAGCAGGATGGCAATGAAATCATGGTGTTTGTTGGCAACCGTGGCTGCGTACAGATTTTCACCGGT
GTGGTAGAAAAAGTGGTGCCAATGAAAGGTTGGCTGAATATTTTCAACCCGACGTTTACCCTTCATCTATTAGAAGAGAG
CATTGCTGAAGCCTGGGTTACCCGTAAACCGACCAGCGATGGTCACGTAACCAGTCTGGAATTGTTTGCCCATGATGGTA
CGCAGATAGCGCAACTTTATGGTCAACGTACAGAAGGTGAACAGGAGCAAGCGCAATGGCGTAAGCAAATTGCTTCGTTG
ATACCGGAAGGCGTTACTGCATAACGTATAATTAACGGGAGGTCTGGCTGTTGCTGGGCCTCTTTATATTGTTCAATCGT
TCACACCAGATAATTAATATGCTGATGGCGTACCAGCTCATTGATCCGCTTAAGATTGAGGATCATCATGATATTGTGTT
TATGGCAGTAGAACGTTTTTAGCGATATTTTCAGTTTCTCCAGAATATCTTCCGTTGTCATTTGATTCGCAATGCAGCTC
AGAACCTGATGCTGCTTGCGCGAGAGGGACACATCCGCTTCAGGCACAGAGCAGTAACTGCCATTGATGAGTGCGACAAA
ATCGATGATGGCGATAGTTCGCGGAACAAAGGTCACCGGTACTTTCCCCAGGCAGCGTTTAATATTAAAGGGGGAGAAAA
TAATTACATGGACAGGTTTTAATCGTTCAATTTGAGTGAGAAAATTAGAATGAAATACATTATTCATTAATGTATCAATA
ATGACGAAGGCATTCTGATGCAACATTACGTCGATCTCTTCTTCGTTCTGTATATGAACGACATTACCTTTACTCAGAAT
GTTTTTCATCGCGGTGAAAAACATCGTATCCCTGGTAATTATAAGAAACATAACCGACTCCTGGTACGTACATTAACTTT
ATAATAAGTTTGCCAAAGGTAATTAACAGGACAGGGCTTATAATAATAGTTAGCTTACTGTGTATTAATTTGATGTAATG
CATGATGCAGATACTGAGAAAGCATCTGCATCTTTCGGTGGTGTTATTTGACCAGCTCAGGTGTTACCTGACTCACCGCA
TTGGTGTAGTAAGGAGCCCCCCAGCCCGGTTCCGGCCAGAATGCACCATAGCCGTAATCCCACAAGTTATAGGTGGTATT
AACCACTTCTCTCAAATGCCACACCTGGATGCCCTGCATATTCACTTCCAGGAAGTTATACGGGACTTTATTGATAAAGC
CAGGTTGTTCACCCTGAATGGTACCGAGGATGGTAACAAAGTGATTACGATAGTTCACTGGATCAAGGAAGCCGCTTTGT
CTGGCGAGCAGTCGGCCCTGATAGTTGGCTTCAATATCAGGCTTCGCATAGCTATCCAACGGTAATACAGCGATTTCTAA
CAACGTATCCGTTTTGCCATTGATAACGTTGATAACCTTCCCGCCAAAGCGCGCTTGTTGACCAACATATAACCCCGGCT
GGTTATGAACAGCAACAAAACTTTTTTGAATATCAGGTTGGTTATTGCCTTTGATATTTTGCGGAATTGAACTACATGCG
GCAAGCAAAAATGAAAGGCTGAGGATGAGTGCACCTTTTGTCATGTTCATGTTACTATCCTTATCAACAAATATTAAAAC
CATAATAGATATTTCTTTATAGTTTTCATCTGATTCTGAGGCGATATGCCTGATAGTAACGTAAACCTGTCTGATGTTTA
TATCTCTTCTGTTTAGTTGAGCTCAGTTAATTTTTGGGCGTGGCATGAGTATCCATTGTTCCATAATCTATATTCAGAGG
TTTTTAATCTTTTCGTGTCTAATGTTATTTATCTGATTAAGTATTGATTGTGTCTTTTGCGGAAGTGGTGTCGAGCTTAT
CGTTTCAATGTTATTAATAAGACTTACAAGTTGAGCCTCAACTTTGAGTAGTCTGCATTTGTATATGTGGTGTTCGTATG
GCACGCATTAATTTGTTGGCGTTGTTGCGCTAAATCAAATTGTTCAGAGGTGTATCCATTCTCCAGAGAATGGGGCATTC
ATGGGGTGTTGTTCTTCCCGGTTATCACAAGGCCACTTCGGTGTGTCTGGCGTTTTAACATTATCGGTATTTGTTGTGCA
GTTATAAATATCACCGTTATATGTATTTATTACACCTGGGGTAAAGTCAATTGACATAACATTCCTTATTCATCATTTGT
TTTATGCTAAGATTTTTAAATTGGATAATTAGAACAGGAATGGATTTTCTTCTACATACAGTAAATATAATGCGTCATAT
CTTCCTGATATAATTACCTTTGACTTCTCTTTTATTTCCATCTGGTAATATTTGAGTGCAAAAAAAGGCAATAATAATAT
CGCAAAAGAAAACGTTAACAACTATCGAAAATGCTCGTTTTAAAAAGGTATGATGTTCTCTGATAGTGTGTGAAGTGATA
TTTTTGTGATGTTTTAGATATGTAATAATAAAATAGGTTAACGTATGTTGAAATTATTTATTGTGTAAACCACTGATAGA
TCATAATCCAGTACATCTTTAAACTGCTGCACTGTATCGCTGATAACTAAGCAGCTCACTGATACACCATGCTGGACGCG
ATAATTGGAATCTCACGCAGGGAGTACTGTGTAAATAGCAAAATCGCCTGATGCGCTACGACTGTCAGGCCTACAAATAA
CATACAATTCATCGAATTATCATAACTTTGTAGGTCGGATAAAACGCGCCAGCGTCGCATCCGACATAAATAAAGCGCAT
TTTTCTAACAACCTGTGGGGGAATATAGCCGCTTTATTTCAGGCGATTACCCGCCTCATCAACCACTTTCTCGCCATCTT
CCTTGGTGAACGCGCCTTTTTGCGCATCTGGCAGAATTTCCAGCACGACTTCTGAAGGGCGGCACAGGCGAGTTCCCTGT
GGCGTCACCACAATCGGGCGATTAATCAGAATCGGGTGCTGAAGCATAAAGTCGATTAACTGATCGTGAGTAAATTTATC
TTCTGCAAGGCCCAGTTTCTCATACGGCTCGACGTTTTTACGCAGCAACGCGCGTACGGTAATCCCCATATCGGCAATGA
GTTTTACCAGCTCATCGCGCGTCGGTGGTGTTTCCAGATAATAGATAATGGTCGGTTCTGTACCGCTGTTGCGGATCATC
TCCAGCGTATTACGCGACGTACCGCAGGCCGGGTTGTGATAAATGGTAATGTTGCTCATATCAGTATCTCATTACGATGT
GAAAGAGAGGTGTAGCGCCAGCGCCACCAGCGTTACAAACCAAAGCGGACAAGTCAAAAACACATATGGTTTAACGAATA
TGTAAGTGTAGAGAAAGGTGTAGGTGTGAATTAAGCGTTGGGCATTCATTTGAAAGGAGGTCTGAATCAGGACGTAAAAA
AACCGACTTCGCGTCGGTTTTTTTACTGTTCAGCCCTGAGTTGGTGGCTCTGGCTGGAGTGAGATAGCCATCATCTAACG
CATCAATGCTAATACCATACTGAAACTATTGCAAGGACATGCTGGTTTTATAACCCGCAAGTACTGTATGATTATCCAGT
TGGTTCTGAGACATTTTCACTCTGGCAATGCGCATAAACGCTTTCAAAGTCCTGGTCTGAAGTACGGGTGGTGCCGTTAA
CTGATGCTCTGGCCGGAGTGAGATAGTCGTCATCTAACAATGAGACATGCGCCGTGACAGGCAATGGATGAGTAAGCGGA
TGCATTCTCACTCCATCGCATGGAGAAAACGGGTGATTGATAAAGCAATCATCGTTCTTGGGGCGTTAATTGCGCTGCTG
GAACTGATCCGCTTTCTGCTTCAGCTTCTGAACTGATAGCGGAAACGTAGCTAAGGGCTAAGAGCACACTACTCTTAGCC
CTTTAACATTTAACGCATTGTCACGAACTCTTCTGCCGCTGTCGGGTGAATGGCAACCGTGTTGTCGAAGTCTTTTTTGG
TTGCACCCATCTTCAGCGCCACCGCGAAGCCCTGCAACATTTCGTCCATACCAAAACCAATGCCGTGAATACCGACAATC
TTCTCTTCCGGTCCAACGCATACCAGTTTCATGCGGCACGGCTGGCGGTGAGTGGTGACGGCGGTATACATCGCGGTGAA
AGAGGATTTATACACTTTCACCTGATCGTCGCCGTACTGCTCGCGCGCCTGCGGCTCCGTTAAACCAACAGTACCAATCG
GCGGATGGCTGAAGACCACGGTCGGAATGTCGCTGTAATCCAGATGCTCATCCGGCTTGTTATTAAACAGGCGTTCAGAG
AGACGGCGACCTGCTGCAACAGCCACCGGTGTCAGTTCCACTGCACCCGTGTTATCGCCCACCGCGTAAATACCTTCAAC
GTTGGTGTTTTGATATTTATCGACGACGATATAGCCTTTTTCGTTGGTTTTAACGCCAGCAGCTTCCAGGTTGATGTTGT
CATTGGCAGGCTCGCGACCAATCGCCCAAATCAGGCAATCCACCGTTTCACTGCGACCATCTTCCAGCTCCAGCGTCAGG
CTACCATCGGCATTTTTCACTACCGCTTTCGGGATGGCGTTGGTATGCAACTGTGGGCCTTCAGCGTTCATCACTTCAAC
CAGCGTTTCAGAGATCATCGGGTCGAAGCTGCGCAGCGGCGCATGTTTACGCACAAACAGATGCGTCTTCGCACCGAGGC
CGTTAATCACGCCCGCCAGTTCAACGGCGATGTAACCCGCGCCAACAACCGCTACACGCTCTGGCAAAGCCGGAAGGGCG
AAGAAGCCATCAGAATCAATACCGTATTCCACGCCCGGAATATCCGGGTGGCTCGGACGACCACCGGTGGCGATCAGAAT
ATGATCGGCCGTGATGGTTTCGCCGTTGACTTCAATGGTTTTGGCATCAACGAAGCGGGCAAAGCCTTTGATTACATCAA
CGTTATTTTTACCGAGCACGTTCTCATAGGAAGTATGAATACGGTCGATATAGGCGGTACGGCTGGCGATCAACGTTTCC
CAGTTGAATTTATTGATAGTGGTATCAAAACCATAATCCGGGCCGTACATATGGATCGCTTCACGGATTTGCGCCGCGTG
CCACATCACTTTTTTCGGCACACAGCCAACATTTACGCAGGTGCCGCCCAGCTCTTTGGCTTCAATCAGTGCGCATTTCT
GGCCGTACATAGCCGCGCGGTTGATGGAGGCGATACCGCCGCTGCCGCCGCCGATGGCGATGTAATCATAGTGTTTAGTC
ATGACATATTGTCCTTATCGTTGATTACCGCGATTGTAGCGCGAGACGTAATAGGTGCCAGCAATGGCTGCAATTACTCT
GGCACGATCCAGCTTACGGTGGCGTGCCCGGTGCCTGCCGGAACCAGTTTGCTGTGCAGCCACGGCAGCACGTTATTCAT
CTGCTGTTCCAGCTTCCACGGCGGGTTAATCACAATCATGCCGGAAGCGGTCATGCCACGGCGATCGCTGTCTGGCAGCA
CCGCCAGTTCAATTTGCAGAATTTTGCGAATGCCGGTCGCTTCCAGTTCGTGGATCATGCGCTTAATTTGCTGGCGCAGC
ACCACTGGATACCACAATGCGTAAGTGCCAGTGGCGAAACGTTTGTAACCTTCTGCTATCCCGCTGACCACCGCCTGATA
GTCGGTTTTCATTTCATACGGCGGGTCGATAAGGATTAAACCACGGCGGGAAACCGGCGGCAGCTTGGCCTTAAGCTGCT
GGAAACCGTCGGCTTTTTCGACGCGCGCACGGCTGTCTTTCTGAAATTCAGAACGCAGCAACGGGTAATCGCTCGGGTGC
AGTTCGGTCAGTTGCAGGCTGTCCTGTTCACGCAGTAGCTGGCGAGCAATCAACGGCGAACCGGGGTAATAACGCAACTG
CCCGCTACGGTTGAAGTGTTTTACCACATTGATGTACGCCTCCAGCTCCGCAGGCAAATCGTCCTGCTGCCAGATACGGG
CGATACCTTCAAGATATTCGCCGGTACGCTCGGCATGTTCGCTGCCTAACTGATAACGCCCGGCCCCTGCGTGGGTGTCG
AGATAGAGAAACGGTTTATCTTTCTCTTTCAGCGACTCGATGATCAGGCTCTGAACGGTATGTTTAAGGACGTCGGCGTG
GTTGCCAGCGTGAAAGCTGTGGCGATAACTGAGCATGGGTAAAGGTGTTCCGGTAAGTAAAAATCGGCCCGTATTCGGGG
CGCACAAAAGCCTATCAGGACAGTATACCGAAAAGAGGCCGCCGCCGCGAAAGCGTAACGTTTCTCATTGAAATTCACTA
CACTTAACCCCATGCTACAAACATTATGTAAAGCGCCTGTTGAGCGCTTCCTTAACCTCTTTAACCAGGACTGCGCTAAT
GACGAATCCGTTACTGACTCCCTTTGAATTGCCTCCGTTTTCTAAAATTCTCCCGGAACATGTCGTTCCAGCCGTGACTA
AGGCGCTGAACGACTGCCGCGAAAATGTGGAGCGCGTAGTAGCGCAAGGGGCACCGTACACCTGGGAAAATCTCTGCCAG
CCGTTGGCGGAAGTGGACGATGTGCTGGGGCGTATCTTCTCCCCGGTCAGCCATCTGAACTCGGTGAAAAATAGCCCGGA
GCTGCGTGAAGCGTATGAACAAACCCTGCCGCTGCTGTCAGAATACAGCACCTGGGTAGGGCAACATGAAGGGCTGTATA
AGGCATATCGCGACCTGCGCGATGGCGATCATTACGCCACGCTGAACACGGCGCAGAAAAAAGCGGTTGATAACGCACTG
CGCGACTTCGAACTCTCTGGCATCGGTCTGCCGAAAGAGAAACAGCAGCGTTACGGCGAAATTGCTACCCGTCTTTCTGA
ACTGGGCAACCAGTACAGCAACAACGTCCTCGATGCGACGATGGGCTGGACCAAACTCGTTACCGACGAAGCGGAGCTGG
CGGGGATGCCAGAAAGCGCGCTGGCTGCGGCAAAAGCCCAGGCCGAAGCGAAAGAGCTGGAAGGTTATTTGCTGACGCTG
GATATCCCAAGCTACCTGCCGGTAATGACCTACTGCGACAACCAGGCCCTGCGTGAAGAGATGTATCGCGCTTATAGCAC
TCGTGCTTCCGATCAAGGTCCGAACGCCGGTAAGTGGGACAACAGCAAGGTGATGGAAGAGATCCTCGCGCTGCGTCACG
AACTGGCGCAACTGCTGGGCTTTGAAAACTACGCCTTCAAATCACTTGCCACTAAAATGGCAGAAAACCCGCAGCAGGTG
CTGGATTTCTTAACCGATCTGGCAAAACGCGCGCGCCCGCAAGGCGAAAAAGAGCTGGCGCAACTGCGCGCCTTCGCCAA
AGCCGAATTTGGCGTCGATGAGTTACAACCGTGGGATATCGCTTACTACAGCGAAAAACAGAAACAGCACCTCTACAGCA
TCAGCGATGAACAACTGCGTCCGTACTTCCCGGAAAACAAAGCGGTTAACGGCCTGTTTGAAGTGGTGAAACGTATTTAC
GGCATCACCGCTAAAGAGCGTAAAGATGTTGATGTCTGGCATCCGGATGTACGTTTCTTCGAGCTGTATGACGAGAACGA
CGAACTGCGCGGCAGCTTCTACCTCGACCTGTATGCCCGTGAAAACAAACGCGGCGGGGCGTGGATGGATGACTGCGTAG
GCCAGATGCGTAAAGCCGACGGTTCGCTGCAAAAACCGGTCGCGTATCTGACCTGCAACTTCAACCGCCCGGTAAATGGT
AAACCGGCGCTGTTTACCCATGACGAAGTGATCACCCTGTTCCACGAGTTCGGTCACGGCCTGCACCATATGCTGACCCG
CATTGAAACCGCTGGTGTTTCCGGGATCAGTGGGGTGCCGTGGGATGCGGTCGAACTGCCGAGCCAGTTTATGGAAAACT
GGTGCTGGGAGCCGGAGGCGCTGGCGTTTATCTCCGGTCACTATGAAACCGGCGAGCCGCTGCCGAAGGAGCTGCTGGAT
AAAATGCTGGCAGCGAAAAATTACCAGGCGGCGCTGTTTATTCTGCGCCAGCTGGAGTTCGGCCTGTTCGATTTCCGCCT
CCATGCCGAGTTCCGTCCGGATCAGGGGGCGAAAATCCTCGAAACTCTGGCAGAAATCAAGAAACTGGTTGCCGTAGTAC
CGTCTCCGTCATGGGGCCGTTTCCCGCATGCTTTCAGCCACATTTTTGCCGGTGGTTATGCGGCAGGTTACTACAGCTAC
CTGTGGGCCGATGTGCTGGCAGCAGATGCCTTCTCGCGTTTTGAGGAAGAGGGCATTTTCAACCGTGAAACTGGGCAGTC
GTTCCTCGACAACATTCTGAGCCGTGGCGGTTCAGAAGAGCCGATGGAGCTGTTCAAACGCTTCCGTGGTCGTGAACCAC
AGCTGGATGCGATGCTGGAGCATTACGGCATTAAGGGCTGAACATTCAGTGAAAATCTGCTTAATTGATGAAACAGGCGC
CGGAGACGGCGCCTTATCTGTTCTGGCGGCCCGCTGGGGGCTGGAACACGATGAAGACAACCTGATGGCGCTGGTGTTAA
CGCCGGAGCATCTGGAACTGCGCAAGCGTGATGAGCCGAAACTTGGCGGCATCTTTGTTGATTTTGTTGGCGGGGCGATG
GCGCACCGACGCAAATTCGGCGGTGGTCGCGGAGAGGCGGTGGCGAAAGCGGTGGGCATTAAAGGCGATTATTTGCCGGA
TGTGGTGGACGCCACCGCAGGGCTGGGGCGCGATGCCTTTGTGCTGGCTTCAGCCGGCTGCCGCGTGCGGATGCTGGAGC
GTAATCCAGTCGTTGCCGCATTGCTCGACGACGGCCTGGCGCGTGGTTATGCGGATGCGGAAATCGGCGGCTGGTTGCAG
GAGCGGTTGCAGTTAATTCACGCTTCCAGCCTGACGGCGCTGAGCGATATCACCCCGCGTCCGCAGGTAGTTTATCTTGA
CCCAATGTTCCCGCATAAGCAGAAAAGCGCGCTGGTGAAAAAAGAGATGCGCGTGTTTCAGTCGCTGGTGGGGCCGGATC
TTGATGCCGATGGATTACTGGAGCCTGCACGCTTGCTGGCGACCAAACGCGTTGTGGTAAAGCGCCCGAACTACGCGCCG
CCGCTGGCGAATGTCGCCACGCCAAACGCGGTAGTGACCAAAGGGCATCGCTTTGATATTTATGCCGGAACGCCGGTGTA
AAAGTAAAGCAGGGTAGCGTTATCGCTACCCTGCTTTCTGCAAGAATAATTAATGGCTTTCGGGCGTCGCAATCATTCGT
TTCAGCCACGGCACCATCAGCAGCATCACCACCGCAACGCCCAGCGTAACCAGGCCAATCTTACCAAACACGTTGGTATA
GACGGGCAACGTCTCAAGTGGATCGGTAATGTTGTCTGGTACTGCGGTAAATGTTGCCACATAGCCGCCCAGCAAGAACG
CGGCAGCCTGCGTCAGGAACCACATCCCGAGAATAAAGCCCATCAAATGCTGCGGCACCAGGGCAGCAATCATCGCCAGG
CCAAGGGCGCTAATAAACAGTTCACCTAAGCTCTGGAATAAGTACACCAGCACGATAAACCATGGCGATGTCAGCCCCTG
GGCATCCGCAAACCACATTCCAGCCGCTGCAGCCGTCAAAAAGCCCAGTGAGCACATAAACATGCCGAGAGTAAACTTCA
TCGGCATCGAGAGATCTTTGCCTTTGTTACCCAGATGCGTGTAAATGCCTGCCAGTATTGGGCTGGCGAGTACCACCCAG
AACGGGTTAAGCGCCTGGAAGCTGACCGGGTTGATGGAAAAGCCGAGAATTTCATGATGCACGTTGTTGATGGCAAAGAA
GTTCAGCGACGTTGGCATCTGGGCGTAGAGAATGTAAAACACCACCGCTTCGAGCATCAGGACAAAGGCGACAAACATTT
TATTGCGCCCGGTTTTATCCAGCTTGAATGCCTGACGAAAGAAAATGATGGTGACGACGATGGAGAGAACAATCAGCACC
AGATTGGCGACTTCTACGTTGTGCATCAGCCATGCACAGACGAAGATCATCACCACGCTGCCAAGTAACACGTACAACAG
TTTACTGAAGCTCATCGGGCAGAAGTCGGGTTCAGAACCAATATCTTTCACCATTCCGCGACAGGCGATGTAAACCAATA
GCGCGATAATTAATCCCGCACCGCACAGGTTGTAGGTGACTGAATAGCCGAATTTATCAGCGATCACAGGGGCCAGCGAT
AACGCTATCAACGAGCCGATGTTGATCGACATATAGAACAGGGTAAATGCGCCATCAAGCCGCGGATCTTTCGGCGGATA
GCACTTCGAAAGCAAGCTGGCTGGGTTAGCTTTAAACAGGCCGTTACCGACAGCGATAGTCCCCAGGGCGATGAAAATCA
GGTCAGGCTTAAGTAGCGACAGGCCGGTCATGAAGTAGCCAATCGCCAGCACAAGTGCTCCGAGAACAATGGTGCGTTTG
GTTCCCAGCAGGTGGTCGCCAACATAGCCACCAATGGAAATGAGGCCATAGACCAGCGCAGCAAAAGCACCAAAAGTGAC
AAAAGCCTGCTCTTGCGAGAACCCAAGCTGTTTAACGAAGAAAACCGCCAGTACGCCCTGCACGCCGTAGTAGCCGAATC
GCTCCCATAACTCGACAAAAAAGATCATGAAAAATGGGCGAGGTTGCTGCAGCATCCCCATGGGTGTTGTTGTATTCATA
TTTATTAACCTTCCAATACCATCCTGAAAAGTATGAACGCGTAAGGGATAACGCGCGAAAAAGTTTACATCTGTCAGAGA
TTCTTAATATTGATGCGGCGAATAGATTAATACACTATTACAACAGAAAATAACCAGCTGATCACACTAATGATAGAAAA
TATAATGGTGTTAAATGTTGTATTGGCAGGGGTTTTGATTGCGTACGCAGACCGCAGGCCAGATAAGGCGTTTACGCTGC
ATCAGGTAACAAGGCGCGCCAAAAAGCAAAACGCCCGCATATGCGGGCGTTCAGGAACACGTCGTGGAGGGAAGATTATT
CTTCTTCGTCGCGCAGCGGAACAATCAGCATATCAACGTGAACGGTGTTGATCAGCTGACGTGCGGAAGACATCAGTTTG
CTCCAGAAGTCCTGGTGGTGACCACAAACCACCAGATCCATATCGTATTTCTTGATTGCATCGACCAGTACCTGGCCCAG
ATCGCCGCTGCCGCTCAGGGTTTCAGTGATTGGGTAGCCTGCATTGGTTGAAAGCTCGGTCAGTGCATGATGTGTCTCTT
CAGAGATGCGTTTCTGCATATCACCCAGATTCACATCGATAAGCCCGGTGTATAGGTCAGAGTAGTTTACATCTACGTGG
ATCAGAGAAACTTTCGCATTGTAGGGGCGAGCCATAGAGACTGCTTTCTCTACCAGAACTTTGCTTTCCGGGGAGAGGTC
GACCGCGATGAGAATGTGTTTATAAGCCATAGTGTTACTCCTTCCATAAAGTTGTCGATGACTGGCCAGCTAGCGTTTCT
TGTGCCGTTACGTCACCCGCGTCCTGCGAACTACGTGCGCGGGGCTAACCCAGCCGTAAAGATTCAGTGTTAAGACCATC
CTTACCTTATAGCGACCCGGATGATCCGTCAATCCGCCTTGCTTACTCGTTAGATAAACAAATTTTCGACATGAATATAT
TGATAGTGGTTAACCTTCTGGAAAAAAAACAACCTGATCTCCTACACTATCTATAGAGCCGCTCGGATGTTGGTCACCAC
AAAAGCGGTTTCTCCAGGACCTGGTGTTAACTGATTGGCAGCGTATCGGGAGCGGTAGCCCCGGGGTGGAACTCCGCGGG
CAGGTCGCCGGGGAGGAGGTATGATAAGCACCGTCGCATTATTTTGGGCTTTATGTGTCGTTTGCATTGTTAACATGGCG
CGCTATTTCTCATCACTACGCGCGTTGTTAGTGGTACTGCGTAACTGCGATCCATTGCTCTATCAATATGTTGATGGAGG
GGGCTTTTTTACCTCACATGGCCAACCCAACAAACAGGTGCGTCTCGTTTGGTATATCTATGCCCAACGTTATCGCGATC
ATCACGATGATGAGTTTATTCGCCGCTGTGAGCGGGTGCGTCGGCAGTTTATTCTGACCAGCGCATTGTGTGGTCTGGTG
GTGGTCAGCCTGATTGCATTGATGATTTGGCATTAAGCACTTCAGCAATAATGACGCATAAAAAAAGCGGGCCAGTAAAC
TGACCCGCTCGTTTTGGTGCGTACGATTACAGGAACTGCAAGGAGAGCCAGTACAGCCCGCCGGAAAGCAGTACCGCAGC
CGGAAGGGTAAATACCCAGGCCATCAGAATACTGGTTACGGTTTTACGCTGTAAGCCGCCGCCATCTACCACCATCGTCC
CCGCGACAGAAGAGGAGAGTACGTGAGTAGTGGAAACCGGCATCCCGGTATAACTTGCCAGGCCGATAGACACTGCCGCC
GTCATCTGGGCAGACATCCCCTGAGCGTAGGTCATGCCTTTCTTACCGATTTTCTCACCGATAGTCGTTGCCACACGACG
CCAGCCAATCATCGTACCGATACCTAACGCCAGCGCGACCGCCATGATGATCCACACCGGCGCATACTCGATGGTGCTAA
GCATGTCGGACTTCAGTTTCTTCAACAGGCGCTGATCGTCAGCACTCACGCCAGGCATCTTCACCACTTTGTCGATAGTG
TCAGAAACGCACAGCATAATGCGGCGCATCTGGCTACGTTGATCAAGCGACAGCTTGTCGTAGCTTTCCACATCGGTAGT
CAACATGCCTTTCAGGCGGTTGAGCGCGTTAATGGTATTCGACGGATGGCAATGGAACTCCGCGGGTTGCGTTGCGCCAG
CTTCCGGAGCCGGTACTAACTGATCAGCACCGGTCGCTTGTTTCAGCAGCGCAGGATGCTGCTCAAAGTAAGCTTCGACG
TTGTTGATGGCATCACGGGTACGGGTGATTTCGTAGCCAGTGGCATTCATGTTCACCACGAAGCCTGCTGGTGCGACACC
AATCAATACCAACATAACCAGACCAATGCCTTTCTGACCATCGTTCGCGCCATGCGAAAACGCCACGCCGATAGCGGAAA
GGATCAGCGCAATACGCGTCCAGAACGGCGGCTTTTTCTTGCCGTCTTTCTTTTCACGCTCCGCTGGGGTCAGGTGGATA
CGGGCGCGTTTCTTGGTGCCGCTCCAGTAGCGACGCAGCAAGAAAATCAGACCGCCAGCAAACACCAGGCCGACAATAGG
GGAAACGATCAGAGAACCGAAAATACTTAATACTTTCGGGATATTGAGTGCATCCACCACTGACGTCCCGGTCATCAACG
CATTGGTTAAACCAATCCCGATGATCGCGCCAATCAGCGTATGAGAGCTGGATGCAGGTAAACCAAAGTACCAGGTACCC
AGGTTCCAGATAATCGCCGCCAGCAACATAGAGAACACCATGGCAAGGCCATGAGACGATCCCATATTAAGCAGCAGATC
CGTCGGCAGCATATGCACAATGGCATAGGCAACACTCAGACCACCCAGCAAAACACCCAAAAAGTTGAATACCGCCGCCA
TAACCACGGCGAGCTGAGAACGCATCGCGCGGGTATAGATAACGGTTGCCACGGCGTTGGCTGTGTCATGGAAACCATTG
ATGGCTTCGTAGAACAGCACAAAAGCCAGTGCAAGCAATAATAACAGCCCGGTATGCAAATCCAGGCCAGCAAACAAATG
TAGCATAGGACGTTACGCCATTTTGAGGACATGAACGCGGCGCATTATCAGTGACTTTCGCGGCGCGGGCAAAGTGAAAT
ATAGACTTTTTTTGATTTGCCTCCTGTATGGATTCCACTCAAAAAATAATTATCTTATATAATTCAGGCAAATACTTCCT
TTTAGTAATATTGATGCTGGTGCGACTACTGAGGAATCTTTACAATTCACGCCCGTTTTTTCTTAGAGGAGCGCAACGTG
GAAAGGTTTGATGCCATTATTATAGGCGCTGGTGCGGCAGGGATGTTCTGTTCTGCGCTGGCAGGTCAGGCAGGACGCCG
GGTTCTGCTGATCGATAATGGTAAAAAACCAGGGCGTAAAATCCTCATGTCTGGCGGTGGGCGCTGCAACTTTACCAACC
TTTATGTCGAACCGGGCGCTTATCTGAGCCAGAATCCGCATTTTTGTAAGTCTGCACTCGCGCGTTTTACCCAGTGGGAT
TTCATTGATCTGGTCAATAAACACGGCATCGCCTGGCACGAGAAAACGTTAGGGCAACTCTTCTGCGATGACTCCGCGCA
GCAGATTGTCGACATGCTGGTGGATGAGTGCGAGAAGGGCAATGTGGCCTTCAGATTGCGTAGCGAAGTGCTGAGCGTGG
CGAAGGATGATACAGGCTTCACGCTTGAACTGAACGGCATGACTGTCGGTTGCGAAAAGCTGGTCATCGCGACCGGTGGA
CTGTCAATGCCGGGGCTGGGCGCATCGCCGTTTGGTTATAAGATTGCCGAACAATTTGGCCTCAACGTGCTGCCGACCCG
TGCGGGTCTGGTGCCATTCACTCTGCATAAACCGTTGCTTGAAGAGTTACAGGTGCTGGCGGGCGTGGCGGTGCCTTCCG
TGATTACCGCTGAAAACGGTACCGTTTTCCGTGAGAACTTACTCTTCACCCACCGCGGCTTATCTGGACCGGCGGTGTTG
CAGATTTCCAGCTACTGGCAACCGGGTGAATTTGTCAGCATCAATCTGCTACCGGATGTGGACCTCGAAACCTTCCTGAA
TGAGCAGCGTAATGCACATCCGAATCAGAGCCTGAAAAACACACTGGCGGTTCATCTACCGAAGCGGTTGGTTGAACGTT
TACAGCAACTCGGGCAAATCCCGGATGTTTCGCTAAAACAGCTCAACGTGCGTGACCAACAGGCACTGATTAGCACATTG
ACCGACTGGCGCGTACAACCCAACGGCACTGAAGGCTATCGTACTGCTGAAGTGACGCTCGGCGGCGTGGACACCAACGA
ACTCTCTTCACGGACGATGGAAGCGCGCAAAGTGCCTGGGCTGTACTTCATCGGCGAAGTGATGGACGTCACCGGTTGGC
TGGGGGGCTATAATTTCCAGTGGGCGTGGTCGAGTGCGTGGGCTTGTGCGCAGGATTTGGTGGCAGAATAAGAAGCAAAA
TGCGCTCTCGATACCGGAGGGATTAACCTGAATAAAACCAGATAAGGCGCCCAACGCCTTATCTGAAGCCTTTTTTATTA
TTTTTTCGCTGAACCCGCTTCTAATATAGAAACGATGGAAAACAGTGTAAAACAAACTGCACCTAAGCCAACCAGAACTC
GCGAAGGAATAAAGTAAGCCATATCGGTTTGCGCAATTTCAGCCAGGAACGCAGCAAGGAACAGACAAAACAGACAGGTA
AATACCGGAATCATGGGTATTCTGTTGGCTAACGAACATGTGCGTCGCCATACCAGCGCTAACAACCACACTTTGGAGAA
AATACTGTAGCAGATCATCCCCAGGCAAATGAGAATAATGCCGGGGGCCAGGCGGGCGCTTGCATCTGAACTGATTAATA
CGTAGATACCAAAAATAATGGTAAGTGAGCCAAGCAAAATAACCCAATAGCACCACAGCCAATGTTCTTTCACTGAGAAC
GTATTCCGCGTTTGATGGACAATAGTGGCGACAAGGCCAATAAGACAAGCGCAAATTGCCGTTAACCCCATTAGTACGTG
ACCTGCAACATAATGTGGTGTGATATCTGCACTACGTAACAGTATGACTGACCAAATGAAACCAAAGAGAGTAAGCAGAA
CGGGAACGGCAATTAAGCAATTACCGATTGTTGAAGAATAGGCCTGCAATGGCGTACCGTCACTCTTACTGCCCGAGGCG
TTTTTGGGGATCAACAGAAAATGTCCGGAAGATGCCGCTACGGTTGATACACAAGCGGCAATCATGCCAACGCCGAAAAT
AACATGACCGGCGACAAATTCATCTGCCATCACATTATTGCTTGCCAACAGTGACCATCCCCAAATCATAGTTGTAGCAG
AACCGGCATAACCAATAACGGGAAATAACCTGTTGTAGAATTTATTCATGCCGTGAGTTAACTGAGATATAATAATAAAT
GCGGTAGTGAACAATGCCAGACATATCGCAGAAAGAGAAATCAGAACATGCCCTGCAACGAAATATTCACTTTGCCCTGA
ACCGGTTAATACAAACTCACCTAATGCGATGCATATTATACCCATCAGTAAAGGAATTAATTTAAACAACCATCCGATAT
ATATATTCATTTTAAACCCCATATATATTTTCTGCTACACTTCGAAAAACATATGATTCGTCTTTTCAGTTAGTTAAATA
TGTCTATAAGATGCCATCAATTAAAAAAAGTAACTTCACTATAATCGGATTTAGCGTTATGGGGATCAACTTTTAGCGGT
GAGTTAATGCTATTAAATAAATATTTATCCTAAGATAAACTCTGAATTAATATCTTTATCTTATTTTGTTGTTTTAAATG
AGTCTTTTAGGGAATATTTTATTAAACCCACGAGCCTTTATCATCTATCATCTTTTCAGAATAAATTATTTTATATTCGG
TATTTATTCGCACATCAGGCGATAATAACGCTATGTGATAGTCATCAGGTTTCCCTGTTACGGAAACCTGTGCAACAGAA
TCTGTGAACCTGTACAGAATATTTTTGGAAAAAACACCAGCGAACGGAAGAACATCGCGATGTATCACAAGTTGATGGCA
ATCAAATAGACAACATGAATATAAATGTTAGTATTTAATTGATTTCACTTATGAGTATGCGTGTTTCATTTACGGCCAGG
AATGCTGATGATGACAACATTACTACCCGTTTTCACTAAGCCTTCCCCATTGGCGCTCAATGCTCTGTGCGCTGGTCGTA
TTTGCCATTTCCTTCTTATCCCGGATGGAAGAATCCGCTGAACATCGTTCGGTGGCAGTTGTAACACGCGTCGATTGCTT
ACAGGGATTATGGCGGATCGATTATGGATAAGAGTAAGCGCCATCTGGCGTGGTGGGGTGTCGGGGCACTGGCGGTGGCT
GCCGTCGTGGCGTGGTGGCTGTTGCGCCCGGCGGGTGTGCCGGAAGGCTTTGCTGTCAGCAATGGGCGCATTGAAGCGAC
GGAAGTGGATATCGCCAGCAAAATTGCCGGGCGTATCGACACCATTCTGGTGAAAGAAGGCCAGTTTGTTCGAGAAGGTG
AAGTGCTGGCGAAGATGGATACTCGCGTGTTGCAGGAACAGCGACTGGAAGCCATCGCGCAAATCAAAGAAGCACAAAGT
GCCGTTGCCGCCGCGCAGGCTTTGCTGGAGCAACGCCAAAGCGAAACTCGTGCCGCACAGTCGCTGGTTAATCAACGCCA
GGCAGAACTGGACTCCGTAGCAAAACGTCATACGCGTTCCCGCTCACTGGCACAACGGGGGGCAATTTCTGCGCAACAGC
TGGATGACGACCGCGCCGCCGCTGAGAGCGCCCGAGCTGCGCTGGAATCGGCAAAAGCTCAGGTTTCTGCTTCTAAAGCC
GCTATAGAGGCGGCACGCACCAATATCATTCAGGCGCAAACTCGCGTCGAAGCGGCACAAGCCACTGAACGGCGCATTGC
CGCAGATATCGATGACAGCGAACTGAAAGCCCCGCGTGACGGACGCGTGCAGTATCGGGTTGCCGAGCCAGGCGAAGTGC
TGGCAGCAGGCGGTCGGGTGCTGAATATGGTCGATCTCAGCGACGTCTATATGACTTTCTTTCTGCCAACCGAACAGGCG
GGCACGCTGAAACTGGGCGGTGAAGCACGGCTGATCCTCGATGCCGCGCCAGATCTGCGTATTCCCGCGACCATCAGTTT
TGTCGCCAGCGTCGCCCAGTTCACGCCAAAAACCGTCGAAACCAGCGATGAACGGCTGAAATTGATGTTCCGTGTCAAAG
CGCGTATCCCACCGGAATTACTCCAGCAGCATCTGGAATATGTCAAAACCGGATTGCCGGGCGTAGCGTGGGTGCGGGTG
AATGAAGAACTTCCGTGGCCTGACGACCTGGTGGTGAGGTTGCCGCAATGACGCATCTGGAACTGGTTCCCGTCCCGCCT
GTCGCGCAACTGGCGGGCGTGAGCCAGCATTATGGAAAAACCGTTGCGCTGAACAATATCACACTCGATATTCCGGCCCG
TTGCATGGTCGGGCTGATTGGACCGGATGGTGTCGGTAAATCGAGCTTGTTGTCGTTGATTTCCGGTGCCCGCGTCATTG
AGCAGGGCGGCGTGATGGTGCTGGGCGGCGATATGCGCGACCCAAAGCATCGCCGCGACGTCTGCCCGCGCATCGCCTGG
ATGCCGCAGGGGCTGGGCAAAAATCTCTACCACACCTTGTCGGTGTATGAAAACGTCGATTTTTTCGCCCGCCTGTTCGG
TCACGACAAAGCGGAGCGGGAAGTGCGAATTAATGAGCTGCTGACCAGCACCGGATTAGCACCGTTTCGCGATCGTCCGG
CAGGGAAACTCTCCGGCGGGATGAAGCAAAAACTTGGGCTGTGCTGTGCGTTAATCCACGACCCGGAATTGTTGATTCTT
GATGAGCCAACAACGGGGGTTGACCCGCTCTCTCGCGCCCAGTTCTGGGATTTGATCGACAGTATTCGCCAGCGGCAGAG
CAATATGAGCGTGCTGGTTGCCACCGCCTATATGGAAGAGGCGGAACGCTTCGACTGGCTGGTAGCGATGAATGCCGGAG
AAGTGCTGGCAACCGGTAGCGCCGAAGAGTTGCGGCAGCAAACGCAAAGCGCCACGCTGGAAGAAGCATTTATAAATCTG
TTACCGCAAGCACAACGGCAGGCGCATCAGGCGGTAGTGATCCCACCGTATCAACCTGAAAACGCAGAGATTGCCATCGA
AGCGCGCGATCTGACCATGCGTTTTGGTTCCTTCGTTGCCGTTGATCACGTCAATTTCCGCATTCCACGCGGGGAGATTT
TTGGTTTTCTTGGTTCGAACGGCTGTGGTAAATCCACCACCATGAAAATGCTTACCGGATTGCTGCCCGCCAGCGAAGGT
GAGGCGTGGCTGTTCGGGCAACCGGTTGATCCAAAAGATATCGATACTCGCCGTCGGGTGGGCTATATGTCGCAGGCGTT
TTCGCTCTATAACGAGCTCACCGTGCGGCAAAACCTGGAGTTACATGCCCGTTTGTTTCACATCCCGGAAGCGGAAATTC
CCGCGCGAGTGGCTGAAATGAGCGAGCGTTTTAAGCTCAACGACGTTGAAGATGTTCTGCCGGAGTCATTACCGCTCGGC
ATTCGCCAGCGGCTTTCGCTGGCGGTGGCGGTGATTCATCGCCCGGAGATGTTAATCCTCGATGAGCCAACTTCTGGCGT
CGATCCGGTGGCGAGGGATATGTTCTGGCAGTTAATGGTCGATCTTTCGCGCCAGGACAAAGTGACCATTTTCATCTCCA
CCCACTTTATGAACGAAGCGGAACGGTGCGATCGCATCTCACTAATGCACGCCGGAAAAGTGCTCGCCAGCGGTACACCG
CAGGAACTGGTTGAGAAACGCGGAGCCGCCAGTCTGGAAGAGGCATTTATCGCCTATTTGCAGGAAGCGGCAGGGCAGAG
CAACGAAGCCGAAGCGCCGCCTGTGGTACATGACACCACCCACGCGCCGCGTCAGGGATTTAGCCTGCGACGTCTGTTTA
GCTACAGCCGTCGCGAAGCACTGGAACTGCGCCGCGATCCGGTACGTTCGACGCTGGCGCTGATGGGAACGGTGATCCTG
ATGCTGATAATGGGTTACGGCATCAGTATGGATGTGGAAAATCTGCGCTTTGCGGTGCTTGATCGCGACCAGACCGTCAG
TAGCCAGGCGTGGACGCTCAATCTCTCCGGTTCCCGTTATTTTATCGAACAGCCGCCGCTCACCAGTTATGACGAACTTG
ATCGTCGGATGCGTGTGGGCGATATCACGGTGGCGATTGAGATCCCTCCCAATTTTGGCCGCGATATCGCGCGTGGTACG
CCCGTGGAACTCGGTGTCTGGATCGACGGTGCGATGCCGAGCCGCGCCGAAACGGTAAAAGGCTACGTGCAGGCCATGCA
CCAGAGCTGGCTACAGGATGTGGCGAGCCGACAGTCCACACCCGCCAGCCAAAGCGGGCTGATGAATATTGAGACGCGCT
ATCGCTATAACCCGGACGTAAAAAGCCTGCCGGCGATTGTTCCGGCGGTGATCCCGCTTCTGCTGATGATGATCCCGTCA
ATGCTAAGCGCCCTTAGCGTGGTGCGGGAAAAAGAGCTAGGGTCGATTATCAACCTTTACGTGACCCCCACCACCCGTAG
CGAATTTTTACTTGGCAAACAGCTGCCATACATCGCGCTGGGGATGCTGAACTTTTTCCTGCTCTGCGCCCTGTCGGTGT
TTGTGTTTGGCGTACCGCATAAAGGCAGTTTCCTGACTCTCACCCTGGCGGCGCTGCTGTATATCATCATCGCCACCGGA
ATGGGGCTGCTGATCTCCACCTTTATGAAAAGCCAGATTGCCGCCATTTTCGGTACGGCAATTATCACGTTGATCCCGGC
GACACAGTTTTCCGGGATGATCGATCCGGTAGCTTCGCTGGAAGGTCCAGGACGTTGGATCGGCGAGGTTTATCCCACCA
GTCATTTTCTGACTATCGCCCGCGGAACGTTCTCGAAAGCGCTGGATCTGACTGATTTGTGGCAACTTTTTATCCCGTTG
CTGATAGCCATACCGCTGGTGATGGGCTTAAGCATCCTGCTGCTGAAAAAACAGGAGGGATGATGCGCCATTTACGCAAT
ATTTTTAATCTGGGTATCAAAGAGTTGCGCAGTCTGCTCGGTGATAAAGCGATGCTGACGCTGATTGTCTTCTCGTTTAC
GGTGTCGGTGTATTCGTCAGCGACCGTTACGCCAGGATCGTTGAACCTCGCGCCGATCGCCATAGCCGATATGGATCAAT
CGCAGTTGTCGAACCGGATCGTTAACAGCTTCTATCGCCCGTGGTTTTTGCCACCGGAGATGATCACCGCCGATGAGATG
GATGCCGGACTGGACGCCGGACGTTATACCTTCGCGATAAATATTCCGCCTAATTTTCAGCGTGATGTCCTCGCCGGACG
CCAGCCGGATATTCAGGTGAACGTCGATGCCACGCGCATGAGCCAGGCATTCACTGGCAACGGTTATATCCAGAATATTA
TCAACGGTGAAGTGAACAGCTTTGTCGCGCGTTACCGTGATAACAGCGAACCGTTGGTATCGCTGGAAACCCGGATGCGC
TTTAACCCGAACCTCGATCCCGCGTGGTTTGGCGGGGTGATGGCGATCATCAACAACATTACCATGCTGGCGATTGTGTT
GACCGGATCGGCACTGATCCGCGAGCGTGAACACGGCACGGTGGAACACTTACTGGTGATGCCGATAACGCCGTTTGAGA
TCATGATGGCAAAGGTCTGGTCGATGGGGCTGGTGGTGCTGGTGGTATCGGGATTATCGCTGGTGCTGATGGTGAAAGGC
GTGCTGGGCGTACCGATAGAAGGCTCGATCCCGCTGTTTATGCTGGGCGTGGCGCTCAGTCTGTTTGCCACCACGTCAAT
CGGCATTTTTATGGGGACGATAGCGCGTTCAATGCCGCAACTGGGGCTGCTGGTGATTCTGGTGCTGCTGCCGCTGCAAA
TGCTTTCCGGTGGTTCCACGCCGCGCGAAAGTATGCCGCAGATGGTGCAGGACATTATGCTGACCATGCCGACGACACAC
TTTGTTAGCCTCGCGCAGGCCATTCTCTACCGTGGTGCCGGATTCGAAATCGTCTGGCCGCAGTTCCTGACGCTGATGGC
AATTGGCGGCGCGTTTTTCACCATCGCACTGCTGCGATTCAGGAAGACGATTGGGACAATGGCGTAAGGAAGGGAAACTT
GACTTCATATTGTGATGTCATACTATTGATGTCATAAAGTGAAGTCATAAGGACATGCCATGAGAACCCAGGTACAGGCT
TTGCGGAAGAAACAAAAAAATACATTGGATCAAATATTTAAATCTCCTGTTCCTCAAGGGATTAAGTGGTCTGATATAGA
GTCACTGGTTAAAGCATTAGGCGGAGAAATTAAGGAAGGAAGAGGTTCGCGTTGTAAGTTCATACTAAATATGAGCGTTG
CGTGTTTCCATCGGCCTCATCCGTCGCCAGATACCGATAAAGGCGCTGTAGAAAGCGTGCGTGACTGGTTACTAAGTATA
GGGGTAAAACCATGATCAAACTGAAGACGCCAAACTCTATGGAGATTGCCGGGCAACCTGCTGTTATCACTTACGTGCCA
GAACTGAATGCATTTCGTGGCAAATTCCTGGGCTTGTCAGGTTATTGTGATTTTGTCTCTGACAGCATTCAGGGGCTGCA
AAAAGAAGGGGAGCTTTCCCTGCGAGAGTATCTTGAGGATTGTAAAGCTGCGGGTATTGAGCCGTATGCGCGTACAGAAA
AGATTAAGACCTTTACATTACGCTATCCAGAATCGCTGAGTGAACGCCTTAATAATGCGGCTGCGCAGCAACAAGTCTCT
GTAAATACTTATATTATTGAAACGCTAAATGAGCGTTTGAATCATTTATAAATTTTAGCGTCGTACATTACGCAGAATAT
CTGCCTTTACAGGATCTATCTATGCAACTGAACTTAATTTTATAAATTAAGTTCAGTTAATATCTTTTCTTTCCTCGTTT
TAGAAATAACTCAATCTTCCTTCGGCAGGCACTGCAAATGCCCGTGCCGCACGCCGCGCTGGGCGATGACGTCATCGGCA
AAATGCTGCACGTCGCTCATGTCACCTTTCAACACGGCGATTTCCAGACAGTCGTCGTGATTAATGTGCACATGCAGAGT
AGCAACCGAGAGATCGTGGTGATGATGCTGGGTGGAGACAATACGGCTGGCTAAGTCGCGTTTTTCGTGTTCATACACAT
ACGACAGCACCGCGAAACCTTGTGTGCCGTGTTGTTGAGTGGCTTCCTGCGCCAGAGCGCTACGCAGAATATCGCGGATC
GCCTCGGAACGGTTGTTATAACCACGACGCTGGCTCAGGCTGTCCAGCGTCTCCAGTAAATCGTCATCAAGCGTGATGGT
GACTCGTTGCATTTGCGTTAAACCTTTTCTGTGGTGCGACGGCGCACGGGGAATGCGGGTAATACCGCGTTTTGTAGCAC
ACGTCCGGCGTCAGAGGAAAAGGTTAATTTATCTCCCACCACCTGGGTTTCGACGATTTGTCCGTTGTCCATCACCATCA
CCCGCTGACAGAAGCGTTCCACAAGGCGTAAGTCGTGGGTGATGAACAAGCAGGCGGTGCCAAACTGTTGTTGCAGCTTT
TTCAGCAGGCGAATGACGCCCGCCTGTAACACGAGATCAAGGTTCGAAACCGCTTCATCCAGAATCAGCAGTTTCGGTTC
GACCGCCAGCGCGCGTGCCAGGCAGACACGCTGGAGCTGGCCGCCGCTTAACTGCGGTGGGCGTTTGTCGAGCACGCTAT
CGTCGAGATCGACCGCCTTCAGCATTTCACTGGCGCGCGCCAGTTGTTCGGCTTTTTTCAGCGATAGCAGGTGGCGCATC
GGTTCACGCAGGATCTCGCGCACGGTTTTGCGCGGATTCACGGCGCTGATGGAGTCCTGAAACACCATTTGAATATCACG
GCGGAACGCTTTACGTTGCGCGCGATTGAGCTTCGCCAACGGTTCGCCGCGCCAGCTAATATTTCCCTGTGAGGGCGACT
CTAACCCTACCAGCAGCCGCGCGAGGGTACTTTTTCCGCAGCCGCTGCGCCCCAGCAGGGCGACGGTTTCACCGCTTTTC
AGGGCCAGGGAAACGTTATTCAGCACCGCCTGGTGTTGATGTTTGCCGCTAAATCCACCGTGCGCGTAGTGATGGGAAAG
GTCGGAGACGTTAAGTAAAGTCATGATGCCAGCTCCATACCGTAGAGGGCGAGATGAGCGGAAACCAGGCTGCGCGTTAC
CGCATGTTTGGGGGCGTTAAACAGCGTTTCTACATCGCCCTGTTCGACAATTTTACCGTGAGACATTACCGCCACATCGT
CTGCCAGACGCGCTACCACGCCCATATCATGGGTAACCAGCAGCATTCCCGGTGCTTGTTTTTGCATAATGCTTTCCAGT
AGATCGAGGATGCGTGCTTGTGCTACCACGTCGAGATCGGTGGTTGGTTCATCGGCGATGATAAACGGTGATTCGCACAG
CACCGCCATCGCAATCATCATGCGCTGCAACATGCCGCCGCTCATCTCGAACGGGTAGAGCTTCAGCACGCGCGCGGCGT
TTTCCAGCCCCACCGCTTCTATGGCAGCGGTAAGCGTAGCGTCATCGGCGGGTTTCCCCAGCGCCAGGCAGGTTTCACGC
GCGTGAGTGTGCATGGTGTGCAGCGGATTAAAGGCGCTGCGCGGGTTCTGCATGATGGTGGCAATTTTGATACCGCGCAG
GGCGCAGGGAGAAACCGGTTTTCCATCGGCCAAAATTTCCCCCGCCGTCTGGCGAACGCCAGCAGGCAGAATGCCCAGCG
TCGCGGCGCAGGTCAGCGACTTCCCGCTGCCACTTCCGCCGACTAACGCCAGCACGCGCCCACGTTGCAGGGTTAACGAT
ACGCCATGCACCAGCGGCTGCGCGGCCTGTAGCGCGATATTACGGAGTTCAATCTGTTGCGGCATTAGTGTGCGTGCTCC
GTCACCAGATGAGGGTCCAGATGATCGCGCAGTGCGTCACCCACCAGGTTAAAGGCCATCACGCTGATAAACAGCGCCAG
CCCCGGCCAGAACATTTGCAGCGGCTGGGTCCAGATATACTGACGCGCGTCGTTAATCATCACGCCCCATTCGGCGGTCG
GCGCGGTCACGCCGAGACCGAGGAAGGACATCCCCGCGACGTGTAGCATCATATGACCGATATCCAGCGTCGCCAGCACC
AGCAGCGAGGGGATCACCGCACCTGCCAGATGATCAATAAACACCCGCACATGGCCCGCGCCAGAAAGCCGTGATGCCAG
CACAAACTCGCGCTGGCGCAGTGAAATCACCAGACTGCGCACCATGCGCGCGTACCATGCCCAGTGCGAAAGGGCGATAG
CGATAATTACGTTGGTCAACCCGGTGCCAAGCACGCCGACCATAAAGAACGACAGAATCGAGGTTGGGAAGGTCATAAAC
ATATCCGCGACGCGCATGGTGGCCTGATCAACGCGCCCGCCAATCAGCCCGGCGCTGCCGCCAATAATCAGCCCTAATGT
CAGCACCAACAGCAGGCAGGCCATTACCGAGCCGAGCGACACGCGGGTCGCTGCCATCAGCCGCGAGAAAATATCGCGCC
CTAAATGATCGGTGCCCAGCCAGTGCTGCGCATCCGGCGAGAGCAGGCGCGACGGCAAATCAATAGCCTGAGGGTCATAC
GGCAGCCACCACTGGCTGGTGAGCGCAATCAGCGCCAGCAGGGCGATAATGATCAGCGCCAGGCGAACCGACCAGCGGGA
GGAGAGGAAAAAGTTCACGCGTGCGCTCCTTCATGACGACGAATACGCGGGTCCAGCGCGGCGTTGAGCAAATCGACAAT
CAAATTACAGACCACAAAAACCACCACCATCATCAGCGTAAAGCATTGGATCACCGGATAGTCACGGTTGAAAATCGCCG
ACACCGCATAGCGCCCGACGCCCGGCCAGGCAAAGATGTTTTCGATAATCATCGTCCCGCCAATCAGTTCGCCAATGTGC
ATCCCCACGGCAGTGATCATCGGCAGCGAGGCATTGCGCAGAATATGGCGGCGTTCGGTCTGTTTGTCGCTCAGACCACG
CAGTCGTGCCCAGGTGACGTGACGCTGACCGGCGACGTCCAGCATACTGGCGCGCAGCAAACGCGCGTTAATCGCCAGCG
ACATAAAGGCGATGGATACCGCAGGCAAAATGATGTGCTGCCAGCCGCCGTAACCCATCGCGGGTAGCCATTGCAGATAC
ACCGAAAACGCCATCACCAGTAAAAACGCCAGCCAGAAGTTAGGCATCGACACGCCGAGAAACGCGATGAAACGGACGGC
GAAATCCGGCAGACGATCGCGATGGCGCGCCGCCCAGATACCGAGCGGCACGGAGGTGAGCAGAATTAATACCAGCGCCG
CACCTGCAAGTTCCAGCGTGGCGGGCAGGAAATTCAGCATATCGTCCAGCACCGGGCGTTGGCTGGCGAATGAGATACCA
AAGTCAAGATGCAGCGCCTTCCACAACCAGGTGCCATACTGGACGTACAGCGGCTGATCCAGCCCCAGCATAGTGCGGGT
AGAGGCCAGCATCTCCGGCGTCGGCGGCAGGTTAGATAAACGCAAATAATCAAGCGCCGGGTCGCCGGTGCCGAGGCGCA
GCATCAGAAAAATGATCACCGAGGCGGCGAGCACCATCGGGATCAGCAGCAGAAAGCGGCGTAATACATAACGCAACATT
AAGGTTTCACCGGTTTAATCTGTTCGAACGGGATTTCGGTGGCGATCGGCGCGTAGGGGATGTTACCCAGTTCCGGTTTT
GAAACCACCATCATTGAGATGTAACTGATAGGCAGATAAACCGCCTCGTCATGCAGACGGGTCAGAATGTCGCGATACAG
CGCCTGACGTTGCGTTTCGTCATGGGTCGCCAGCACTTCGCCGATCTCTTTATCAATCAGCGGCTTGTCGGCTAAACCTT
GCTGTGCCTGGAAGTCAGCGTGCGACGGTACGCGCATTGAACTCAGGAAGGCGTGTGGATCGTATGGCGCGCCCCAGGTG
CGGTGGAAAATCATGCCAAAACGACCGTCGCGCTGACGAGCATAGATACTGCTCTCTTCTTCGCCAATCAGCGAGACATC
TGCGCCAATCTGGCGCATATCAGCCTGAATGATTTCCGCCATCGATTTGCTTAACGCATCGGTGCCGATGAACGACAGTT
CAATGCGCAGCGGCTGACCATTTTTCTCGCGGATGTCTTTGCCAGCAGGCAGCGTCCAACCGGCTTTTTCCAGCAACGCT
TTCGCTTTCTGCGGATCGTACTGGCGCGGTTTCAGGCCGAGGTTGGCGTAGGGCACAGAAGGGGCAAACAGGGTGTCGGC
AACCTGCTGGGTACCATACAACGCGTTATCAATCAGCGATTTTTTGTTCACCGCGTAATTAAGAGCTTCACGGACTGCCA
GCTCGTTGGTGGGGGCTTTGGCGGTATTGAGCGCCAGCATCACGGTTTCGATCGGCTGTGACAGTTGAGTGTGGTAAGCC
GGGTTCTGGCTAAAGCGGGCGAAGGTATCAAGCGGTAATAACCCTTCGTTTCCGTACAGCAGGTCGATATCGCCAGTTTC
AAACGCCACCGCGCGGGTAGTCGGGTCCGGGATCACGTTAAAGGTGATCTTTTTAATCGCCGGCTTTTCGCCCCAGTAGT
TTTCGTTACGGACGAAGACATCGTACTGATTCAGTTTCGATTCCTGTAAAACCCACGGCCCGGTGCCAATCGGCGCTTTA
ATTCCGTTCATGGTTTCGTGGTTTTTAAACTGCGAGGGTGCGATAAAACGGAAAGGACGGGGCAGGGCCAGTTCTTGCAG
GAAAGGATAGTAGGCGCTTTTCAGGGTGATTTGCAGCTCGTTTTTACTGAGTGCTTTGACATCAACAATCTGGTTTGCCA
GCTCCAGCCAGGCGTGACGTTGACGGTTATCGAGCACTGCACGGAAGTTTTCTGCCGCCGCCTCTGCATCAAACGGTTCG
CCGTTGGAGAATTTCACGTCATCACGCAGGGTGAAGGTCCAGGTTTTACCATCTTCTGAATGAGTCCAGCTTTTTGCCAG
CCACGGGATCACCGAACCGTCTGCCTGATATTTCACCAGCGGTTCATAAACCATGCTCTGGGCGAACATTTGGTTAGGCG
TGTAAAGGTGCGGGTTTAGTGGCCCGACATTCACCGGCCAGGCGGTGGTGATTTCATCTGGTGCAGCGGCATGGACGATA
AAAGACGCACAAGCCAGCAGCGCAAATAGAGTGCGGCGGAGTGTAGAGAACATGGTAACCCCAATGGATTAAAATAGATG
GCGGAAATAAGTATGACGATTTTAAGTATTCGTCATACTGATTACCTGTTCTGGATCAATAGATGGGCAGTCGGGTGGGC
GGATCAGTTAACTGAATCGATCCATTGCACACTGTCGGCGGTGAGCGTAAAGGGGGTAGGGGTGCAGATCGCCAGGCTTA
AATTTTCTAGCTGACAATGGCTGACTGACAGCGAGGAGTTATAGGTGCTGTCTACGCTGACGATTTGCCAGGCGCTGCCG
CCACGCTGTTTAACGATGGCTTCTTTGCGCGTCCAGATGCGCCAGAACATTTCCAGTTGCTGATCAGGATGCACGGCGTC
CATCTCGGCATGTTCCCCGAGGCTGAATACGGCGTTCGCCAGCCAGCGCCAGTTGGCGCGCGGGCGAATCACTTCGATAT
CGCAGCCGACTTCGCCTTCATCGCTCAACAGCAGGGCGATATCGTCACCGCTATGGCTTAAGTTGAACCATAGCGGCGTT
TCCGGCGCGAATGCAGGTTTGCCTTGTTCGCCATAGATGATCTCCGGTAGCGGGGAAAGCGTGTGCGAAAGCAATGCACG
CCCCGCCAGCCAGCGTTCGCGTCGTGGACCTTGCGGTGCTTGCTCGCGTAAACCCGGTGGCAGAGGAGCTGCGCTTAAGG
TCGAAACTTTCCCCAGAACTATCCGATACATATCAGGGCCAACGTTTAATGGAAAATGAAAGTGCGTATCGTAACACTTG
TCGCCTCATCCCGGTAACCGACTTTTCGGTCTGCCTGGCCCCAGTAGAATCGCCAGTTTGCTGCCGCCTTTGGTGGTTTC
CATCCAGATTTTACACACGCTGGTTAATGGCACCGAAAGTAGCATCCCTACCGGGCCGAGCAGCCATCCCCAAATTAACA
ATGAAAGAAATACCACCATGGTGGACATCCCCAGGCGATGGCCCATCATCCGTGGTTCTAAAATATTGCCGATGACCATA
TGGACCACTAAAAACAATGCGCCGACCAGAATACATTCGTAAATACCATTAAACAGCAGCACCTGAATCATTGGCGGTAC
GGCGGAAATTACCGCACCGATGTTGGGCACGTAGTTGAGCAAAAACGCCAGTACTGCCCACATCAGCGCAAACTGCACCC
CCATCAGCTCCAGCCCCAGCCAGACGATTACGCCTGTCCATAAACTGAGTAGCGTCTTTAACGCCAGATAATGCGAAACG
CCTTTAAGTGCGCGGTGTAGTCCGGCGATGTGAATCTGTGGATTATTCAACGCGAAACGCATTTTGTAAGGGACGTGGCG
CACTTCAAACAGCATAAAAACTACGGTCATCACCAGCAAAAGCACGCTCGCCATTGCCCCGGAAAGCCCGGTCATTAGCG
CCGTGGTGAAGGTAACCACTTTTTCCGAGTCCATCCGCTGTAGTATTCGCTCCGGCGACATATGCAAATTAAGAAAAGGC
AACATCTCCTGCAATTTAAAAAGTTTGCGCGTCAGCTCCTTATTAAACTTCGGCAGCATAGAGATAAATTCGTTAAACGA
TGCCGCCAGTACGCCGACCAGCGCGGTGAGTGCGATCAGCATCACCACAACCACAATCGTAATGGCAACGGGGCGTTGTA
CTCCCCGACGAATAAACCAGGTGACGAGCGGGTTGAGAACGATGGCAAAAAACAGCGCCAGTAATAGCTGCACAATGATA
TCTGCCGCTGCGTGAATGCCCGCGAGGATCACTACCAGCGAGGCCAACTTGAGCAGAATGTGCATGCCCGTTTTATCGGG
TTGAGGGGTTTCCATTGGGGCTTCCTTGTGACTTTTTGTATTAAGTGTAGCGGGAGTCACGCCAGCAATATTCTGATTCT
TACTGCTGATTTTCACGTCAGCACATGGTAAAAATGAAACACTGTTGTAAAAATGTGGTGATCCTCATGCCCGAACCCGT
AGCCGAACCCGCGCTAAACGGATTGCGCCTGAATTTGCGCATTGTCTCCATTGTCATGTTTAACTTCGCCAGCTACCTTA
CCATCGGGTTGCCGCTCGCTGTATTACCGGGCTATGTCCATGATGTAATGGGATTTAGTGCCTTCTGGGCAGGGTTGGTT
ATCAGCCTGCAATATTTTGCCACCTTGCTGAGCCGTCCTCATGCCGGACGTTACGCCGATTTGCTGGGACCCAAAAAGAT
TGTCGTCTTCGGTTTATGCGGCTGCTTTTTGAGCGGTTTGGGATATCTGACGGCAGGATTAACCGCCAGTCTGCCCGTCA
TCAGCCTGTTATTACTGTGCCTTGGGCGCGTAATCCTTGGGATTGGACAAAGTTTTGCCGGAACGGGATCGACCCTGTGG
GGTGTTGGCGTGGTTGGTTCGCTACATATCGGGCGGGTGATTTCGTGGAACGGTATTGTCACTTACGGGGCGATGGCGAT
GGGTGCGCCGTTAGGTGTCGTGTTTTATCACTGGGGCGGATTGCAGGCGTTAGCGTTAATCATTATGGGCGTGGCGCTGG
TGGCCATTTTGTTGGCGATCCCGCGTCCGACGGTAAAAGCCAGTAAAGGCAAACCGCTGCCGTTTCGTGCGGTGCTTGGG
CGCGTCTGGCTGTACGGTATGGCGCTGGCACTGGCTTCCGCCGGATTTGGCGTTATCGCCACCTTTATCACGCTGTTTTA
TGACGCTAAAGGTTGGGACGGTGCGGCTTTCGCGCTGACGCTGTTTAGCTGTGCGTTTGTCGGTACGCGTTTGTTATTTC
CTAACGGCATTAACCGGATCGGCGGCTTAAATGTGGCGATGATTTGCTTTAGCGTTGAGATAATCGGCCTGCTACTGGTT
GGCGTGGCGACTATGCCGTGGATGGCGAAAATCGGCGTCTTACTCGCGGGGGCGGGGTTTTCGCTGGTGTTCCCGGCATT
GGGCGTAGTGGCGGTAAAAGCGGTTCCGCAGCAAAATCAGGGGGCGGCGCTGGCAACTTACACCGTATTTATGGATTTAT
CGCTTGGCGTGACCGGACCACTGGCTGGGCTGGTGATGAGTTGGGCGGGCGTCCCGGTGATTTATCTGGCGGCGGCGGGA
CTGGTCGCAATCGCGTTATTACTGACGTGGCGATTAAAAAAACGGCCCCCGGTGGAAATACCTGAGGCCGCCTCATCATC
TTAAAACTTACTGAATAACCAGCGTATTAATGATGTTTTCTGCGGTGGTCTGTGCTTTTTGCTGATTGTCAGCGGGCAGC
GTAATTTGCATGGTTAGCAGTTGATTACCCACGTTACCCAGAATAACGGAAGAGTACGCCGTCTGGCCTTTCGCGGAGAT
AATGCTGTCTAACTGCTGCATTTTGTGACCTTTCAGCTCAATGGCTTTATTGGTTACCACTTGCAGCTGCGGATCGCGGC
TACGTTGCTGATCTTCCAGACGCTTCGCCAGCACCGCCAGATCTTCTTTCGGATCATCGCCCATGATGACAATGACTGCT
TTCTGCCCGGTGGCGTCGGACCAGACATGCATGTTATTGGCCTGCGTTCCCAGCTTACCGCTCTGGTCGGTCATATCCGC
TGGCAGCGAGAAACTTAACTTGCCATCAAGCAGGTTGACGGGATTCCCGGTCGCGTTACTTTCTGCGACCGAACCCTGCG
CCGTAGCGTTAGTGTCTTTATCATCACAGGCCGCAAGCCCCATAACCAGCAGGCCAATTCCGACATATTTAACCAGATTG
CGCATTGACTTCTTCCTTTCGATAAACGGCCATAACGGCTCATTCATCCATCTTATCACAACTCTGATAACGAACCTTTA
ACTCGCCTGCAAAGCGTTGATTTCGGATTTATCTGCCAGTCTTTTCAACAGCATATTGAGTAGTACGCCATACATTGGCA
GGAAGAAAACGATACTGATTAACACTTTGAAACAGTAATCGACCAGCGCGATTTCCATCCAGTGTTCAGCCATAAAGGCA
TCCGGGCTACGCCAGAAGGCAATGAAGAAGAAGGCCAGCGTGTCGCTGACGTTACCGAACAGTGTGGACGCTGTCGGTGC
CAGCCACCAGTGACGACTCTGACGCAGGCGGTTAAAAACGTGCACGTCGAGGATCTGCCCCAGCGCGTAGGCCATGAAAC
TGGCGGTGGCGATACGGGCGACAAACAGGTTGAAGTGGGCGAGCGCGCCGAATCCTTGCCATGACCCCATATAAAACAGC
GATGAGATGACGTAGGAGATCAGCAATGCGGGGATCATTACCGCAAAGATGATGCGACGAGCCAGCGGCGCGCCAAAAAT
ACGCACGGTCAGGTCAGTAGCGAGAAAGATAAACGGAAAGCTAAACGCGCCCCAGGTGGTATGGAAACCAAAAATGGAGA
CGGGAAGCTGAACCAGATAGTTACTGGAGGTGATCACCAGCAGATGAAATAACGATAACCAGAACAACGCCTTATAGCGT
TGCGTTTGCGAGAAAACGTTCATATTGTACCTTTTTGATTAACCATTGGGGTGAGGGAACCCAATACGTACGACACGTCT
GTTACCTTAACATAATAACGTGCTGACCCTTTTTTCGAGCCGCCGCATGATACTGCTTTACGTTGACAATGCAATGGTTA
ATTTTCACGCAATCGTTAACCTGGTTTGCTTACGGACTCACAGGGCGTAAACTAGCGCCGTTTTTTTATGTGATGAGAAG
AAAATGACCGATCTCTTTTCCAGTCCTGACCATACACTCGACGCGCTTGGCTTGCGCTGCCCGGAACCGGTGATGATGGT
GCGTAAAACGGTGCGCAATATGCAACCAGGCGAAACGTTGTTGATTATTGCCGACGATCCGGCGACGACCCGCGATATTC
CTGGGTTTTGTACCTTTATGGAACACGAACTGGTTGCTAAAGAGACGGATGGACTGCCTTATCGTTATTTGATTCGTAAA
GGCGGTTAATGGGGGAAGATGGGCTTCGATGCCGCCTTTTCCCCTCACCCTAACCCTCTCCCCAGAGGAGCGCTGTCTCT
TGATCAGATCTCCTGATCAAGAGACTTCATCACCAGGTAACCCTCAACCATATCCTGAAGTCTGAACCAGCCATCCCACA
TGACTACCCAACCGGGGCGACCGGTGCGTTTGCTGTCATGCCATCGCCCCAGTTTCGCCAGTTTCAGACAGGCCCATTTC
AGTGTCGGCATCTGTGACGGAAGCGGTTTTCCTTCCAGCTTAACCCACAGCAGTTTCCACTCTGTCGGCGTCAGTATTTT
CTCACAGCTGTCATTTTGTGTTTCTTCACTGATACCGCCCTGCCGCAGGCCCAGCACCCGCACCGCGATAAACGCCTTGA
TAACCACCATGCGCTCGAGGTTATCCCGGGTCTGCATTCGCAGCGATTCCACACATGTACCACCACTTTTCCACGCCTTG
TGGTATTCCTCTATCAGCCAGCGTCGCTCGTAATGGCTGACGATACGTCGCGCATCGGCGGCACTCGCCACTTTTTCTGA
CGTCAGCAGATGCCAGCAGGCGCCGTCCTCTGCCTGCTCCCGGCAACAGACATACGTGAGCGGGAGCGCCTGGCCGCTGT
TGTCGGGATTTTTATGCTGACTTCGCTGTAACTGATGAACATCCGGGCCTGGCGGGCTGCCCGCCCGCCTTTTTGCATCA
CATTCAGCGTGTGGCTTCCCGCGGTTGCCAGGACTTCCGGCAGTTCGAAGAGCTTGCCGGGTGCTTCTTCCAGCCGGCGA
TTCTGTGCTGCACGCACCACGAAGCGCTGCCCGTGGCTGACTTTATAATGCAGGTAATGCCAGATATCCGCTTCCCGGTC
ACAGACAGTGATTACCCGTTTCTGTATCTCCCCCAGCCGTTCGGCCATGCGCTCCGAAGCCTGCTGCCAGCGGTAACTTT
CTTTTTCTTCATAGGGACGTTCTTTTCGCTGGTGCTTAACACCGTAGGTGTCCGTGGCACGACTCCAGCGCTGCTGTTCG
ATAAGACCGACTGGCAGGGCGCTGTCGGGGGCGTACATCAGGACAGAGTGAGCCAGCAGCCCGCGCGTCTTCGGGTTAGT
GGTGGTATTCCCCAGGTCATCAGATGCCGTACTGTGACTGAAGTTAATGGTGGTGGTGTCTTCCAGCGCGAGGAGCAGCG
GATGAGCCTCACATGCCCTTACAGTGGCGGTAAATCCGGCTTCGGCAATGGCTTGCGGGGACACAGACGGGTTACGTATC
AGGCGGTACGCACCTTCAACCTGAGCAGTGGACTGGGATGATTTCACAATAGAAAGACCTGCATGCTGAGCGAGAGAAGA
GGCCAGTGACACAAGGCGTCGTGTACGACGCGGATCACCGAGACGGGCATGTCCAAACTGCTCGTTAGCCCATGAATAAC
AATCAGAAAGTACCATAACAGACCCGAAGAAAATGAAATATAAGAGAAGATCAACGGGTGAGGAAAAAGTTCAAAAAATC
GCTGCCGGGGAGGAAGGAAACTACCGGATGGAAAGAGTCCCCCTAAAGCAGACTGACAGACATCACAAATCCCCGGGTGG
GGATTTGTGTATAAGAGACAGAGAGGAGCGAGGGGACCGATCGCGCTCAATGTTGCTGCTTGAAACCGGTTTGTAGGCCG
GATAAGGCGTTCAAGCTGCATCTGGCGATACGGTGCACAATGCCTGATGCGACGCTGTCGCGTCTTATCATGCCTACGAG
TTCGATGCTCTGTGTAGGCCGGATAAGATGTTCACGCCGCATCCGGCATTGTTGGACCGTAGACTGATAGCCTCTTTATT
TCCTGCGCAATAACCGTAACGCATTCGCCGTCACCAGCACCGTCGCACCGGTATCTGCCAGCACTGCCAGCCACAGTCCG
GTCATCCCTAACAGCGTCGTGACGAGGAAAACGCCTTTCAGCCCCAGCGCAATAGTGATGTTCTGGCGGATATTGGCGTG
AGTGGCGCGTGCCAGTTCAATCATTTGCACCAGACCGCGCAGGTGGTTATGGGTTAATGCTGCATCGGCGGTTTCCAGCG
CCACGTCTGTGCCGCTACCCATTGCAATCCCGATGGCGGCAGCTTTCATCGCTGGCGCGTCGTTAATACCATCACCGACC
ATCGCCAGCGGCGCATGTTGATTCAGCTCGGTCACCGCTTTGACTTTATCTTCCGGCAAGAGGCCCGCTTTAAATTCCAG
CCCCAGTTCCCCGGCGATTGCCGCTGCTGCGCGTGGATTATCGCCGGTGAGGATCACCCCTTTGACACCCAGCGCGTTCA
GTTCACTGATAGCAGTTGCAGCATCGGCGCGCAGGGTATCCTGCAACGCAATGACACCCAGCACGTCATCATTACGTACT
ACCAGCACTACCGTTTGCCCGGCGCTTTCCAGTTCATTAATCAAACCAGCAAATGCATCAGCAGGATGTTTTCCGGCAGC
GCATATCAACACGCGCTCACCGTTAACCTGCGCTTCAATGCCAGCCCCGACCAGCGCCCGCTGTGATTGGGCGGTGGGAA
TGGCGAGTTCAGCAACCTGTGCTTCGCGCACAATGGCCTGTGCCAGTGGATGCGTCGCGCCTTGCTCGACCGCCGCCGCC
AGTGTCAGCAGTTCAGATTCACTAATACCCGTTGCCGGATGAATCGCGGTAACGCGCGGTTTACCGACGGTCAGCGTACC
GGTTTTATCAAACGCCACCTGGGTAACACGACCCAGCTGCTCCAGCGCCGCGCCGCCTTTAATCAACGCCCCACGACGCG
CTGCTGCCGCCAGCCCGGAGGTAATCGCCGCGGGCGTGGAGATAACTAAAGCACACGGGCAACCAATCAGCAGCAGCGTC
AGCCCTTTATAAATCCACTCCTGCCAGCTGGCGGCAAACAGCAGCGGCGGCACCAGCGTTACCAGCAGGGCGACGGCCAT
AATCGCTGGCGTGTAAATACGGCTGAAACGGTCGATAAACCGCTCAATAGGTGCGCGGCGCTCTTCGGCTTCTTCAATCA
GTTTCAGAATCCGGTCAATGGCGCTGGCACCCGGTTCTGACAGCACTTCCAGCGTTACCAGACGGTCTACGCTGGTGGCG
CCTGCAGGAACTTTATCGCCCGTCGCGCGCTCCACAGGAATGGATTCTCCGGTCAGGGCGCTTTCATCAAAACTGGCAAA
CGGTGAGAGCAGTTTACCGTCGGCAGGCAAACGCCCACCTGCCGCAACTTCAATCACATCGCCAGGCCGCAGGCTGTTTA
TTGCCACCTCTTCACGCTCACCGTTACGCAGACGCGTGGCGGTTTCTGGCTTCAGCGCCATTAACGCGCTGACCCCTTGA
CGCGCGCGGCTGGCGGCCCAGCCTTCCAGTCGTTCGCCAATCAAAAACAGCAGCAACACCATCGCAGCTTCAGCCGTTGC
GCCAATAAACAGCGCACCAATAGCGGCTACGCTCATTAAGGTTTCAATGGCGAAGTAGCTGCCAGATTTGATCAGCCGTA
ATGCCTGACGAGCAATTGGGTACAGCCCAACCAGCGTGGTCGCGATAAACGCCAGTTGACCAAACGGATGATTGAACTGC
TCCAGCCCCCAACTGATTGCCATCATCACGATAAGCGTAATCAGCGGCAGATTCTCTTTCAGGCGTGATTCTTGTGGTTC
GTCGGAGGCCTGTTCATCGCGCAGGGAATAGCCCGCTTTTTGCACCGCAGATTCAACTTGTGCCCGTATGTCATTGTCGG
CATCCACCACCAGTTTTTCGGTGGCGAACAACACCTGTACCTGATTCACGCCTGCAAGCTGGCGCACGGCATTTTCCACT
TTGCGCGCACAGGCGGCGCAGTCCATACCGCTGACTTTCCAGCTATAGCGGGTGCCGGAGACGTTTTCAGAGAGAGTTGG
CGTGCTGGAACATGCGCCGTCGCAGCAACAGTCGTTGGTGTTCTGTACCGTAGTTAGCGGTTTGAACGCAGCAAATTGAG
GGGCTTTCTTGCCGTGATTGTCAGGAGTCGACATGGCATCCTCCGGTTAAGTTTTTTCTCATTAACCGAAGGATACACTC
TAGAGTCGACTCCAGAGTCAAGTTTTATCAGAGATACAGCGAGCGGACGATGAGGAAGTGACCAGCAAAGTAGCAGGCCG
CAGCAATCGCGTTGTCCGCACGGAAGCGTCGGCGATAGTGACTACCCAGCCAGACAAAGTTACTGATAAACAGCAACGAA
GCGCCGACAAACGCAGAGAGCGCCGGAGCGGTCGGACGGAAGAACCACAGTTCACCTGCCAGCCACACCATCACCAGCGT
CATGCCGATAAACGTGCAGATAGGCCAACGATACTCTTCCAGACGCGTCCAGATAATCGCCAGTAACAGCGCGCCCAGAA
CCAGCAGCACCAACGGCAGAGGCCAGAAGAAAGAGAGCGTCATCTGACTGGCGAAATAGATGGTGTACAGCAGGTGCGAG
AGGAAAAACGCGCCGATGGCGTACATCAGACGTTGACGTGGCAACAGGGTTAGCGCATCGCCCAGCAGTGAGGCACACAG
CCCCGCCAGCACCAGATAGCTAATGGCGTCGAACATCGGCGCTTGCCAGGCCAGCAACAGCAGGAGAAGAAGGGTTAACG
GTTTAAACACCCAGCGTTGCCAGGTTGGCCCACGATACGATGCATCCACAGATAGCCATGCGGAAAGACAGACAGCGATA
AACGACCAAAGCATCTTAGTTCCTTGAATTCGTTATTTTTTCGTAAGCGGAATGCCTACGGTCTTGCTTCCAGTTTAGTG
GCGAGGGTGGACGGATGACAACACCATAACTGGCAGGGTATGCTTATTTCCGCATTTTCCGATGAGGGATAAAGATGAGT
AAACCACCTCTTTTCTTTATTGTTATCATTGGCTTAATCATCGTCGCCGCATCGTTTCGTTTTATGCAACAACGACGGGA
AAAAGCTGATAATGATATGGCACCGCTACAGCAAAAGCTGGTGGTGGTGAGCAACAAGCGGGAAAAACCGATTAACGATC
GCCGTTCGCGCCAGCAGGAAGTGACTCCGGCAGGCACCAGTATGCGCTATGAGGCAAGCTTCAAACCGCAAAGCGGAGGA
ATGGAGCAGACGTTTCGCCTCGACGCCCAGCAGTACCACGCCCTGACAGTGGGTGATAAAGGTACGCTGAGCTATAAAGG
AACGCGCTTTGTCAGCTTTGTAGGCGAACAATAAGGTTATTTTTTAACTTTAAATTTCTTCTGCCAGACCAGCAGTTCAA
ACACGCCGAAAAGGAAAATCCGCACCTTTTCGGCGGTGGTCATCTGCGGGCCATCTTTCGGTAAAGTGGATTTCAATAGC
GCCAGCTGCATACCATGCATCAGCACGGTAAAAATCAGCGCCACGTTAACGAAAATATTCAGCGGGCGTGGGAAGGGATG
CACCAGGTTGAGGATTAAAAATCCCCAAACACAGAGCATTAACAAACGACCAATATTAATCAGCATCACTTTCTCCTTGT
GCTTCGCGTTGATACAGCCGATAAGCCACCTGACCCGCCACTTTTTCCCGATGTAATGACCAGTTTGCCGGAACAGTGGG
CAGACCGTTTTCGACTTCGCTTTCGACATAAATCAGGGCTTCGTCAGCCAGCCAGCCGTTATCTTCCAGTAAATTTATCG
TCTCTTCTAACAAGCCACGGCGGAACGGTGGATCGACAAACACGATATTATGCGGTGTGCCTTTTTGCGCCAGGAATGAC
ATCGCGTTGCTGTTCACCACGCGTGCATTGCCTGCTTTTAGTGTCGCCAGATTCTTAATTAACTGCTGAGAAACCGCACG
ATCCATCTCAATCAACATGGCCCCCGCAGCGTAGCGCGATAACGCTTCCAGCCCCAGCGCGCCGCTCCCGGCGAAGCAAT
CCAGACATTGGGCGTCAACAATGACCGGAGCCAGCCAGTTAAACAACGTTTCGCGTACGCGGTCGGTGGTGGGGCGCAGA
CCTGGACTATCAGGAACCGGGAGTTTACGGCCTCGCCACTGCCCGCCAATAATGCGGATTTGGCCGCTGCCGGAATGATT
CGGTTTTTTCATGATAAATTGCTCAATCCGCCAGATAACACATACTTGCAGGCGGTGATGTGAATTAAGTTAAGTGATAG
ACTATTTCATCATTTTTTTAGCTGCTATGTACATAGCGTTAACGCTGTGCCATGAAGCAACAGCGAGGAGTGTAGTCGCA
AATGGCGAAAGAAAAAAAACGTGGCTTTTTTTCCTGGCTGGGCTTTGGTCAAAAAGAGCAGACCCCGGAAAAAGAGACAG
AAGTTCAGAATGAACAACCAGTTGTAGAAGAAATCGTTCAGGCGCAAGAGCCTGTGAAGGCTTCTGAACACGCCGTTGAA
GAGCAGCCGCAGGCGCATACTGAAGCCGAGGCGGAAACTTTTGCTGCCGACGTTGTGGAAGTTACTGAACAGGTTGCTGA
AAGTGAAAAAGCGCAGCCTGAAGCGGAAGTCGTTGCTCAGCCGGAACCGGTCGTAGAAGAAACGCCGGAGCCAGTGGCTA
TCGAACGTGAAGAACTGCCGTTGCCGGAAGACGTCAACGCCGAAGCGGTTTCGCCAGAAGAGTGGCAGGCCGAAGCGGAA
ACCGTAGAGATTGTCGAAGCGGCGGAAGAAGAAGCGGCTAAAGAAGAAATCACCGACGAAGAGCCGGAGGCACAGGCGCT
GGCTGCCGAAGCGGCAGAAGAGGCGGTAATGGTGGTTTCTCCGGCAGAAGAAGAGCAGCCGGTGGAAGAAATCGCTCAGG
AGCAGGAAAAACCGACCAAAGAAGGTTTCTTCGCGCGCCTGAAACGCAGCCTGTTAAAAACCAAAGAAAATCTCGGCTCC
GGATTTATCAGCCTGTTCCGCGGTAAAAAAATCGACGATGATCTGTTTGAAGAGCTGGAAGAACAGCTGTTGATCGCCGA
TGTGGGCGTGGAAACCACACGTAAAATTATCACCAATCTGACAGAAGGCGCATCCCGCAAGCAGCTTCGTGATGCCGAGG
CGCTCTATGGCCTGCTGAAAGAAGAGATGGGCGAGATTCTGGCGAAAGTCGATGAGCCGCTGAATGTTGAAGGTAAAACG
CCGTTCGTGATCCTGATGGTGGGCGTCAACGGTGTGGGTAAAACCACGACGATTGGTAAGCTGGCGCGTCAGTTTGAGCA
GCAGGGTAAATCGGTGATGCTGGCGGCAGGCGATACTTTCCGTGCGGCAGCGGTTGAACAGCTTCAGGTCTGGGGTCAGC
GCAACAATATTCCGGTGATTGCCCAGCATACCGGTGCGGATTCCGCTTCTGTTATCTTCGACGCCATTCAGGCCGCTAAA
GCGCGTAACATCGACGTCCTGATTGCCGATACCGCCGGACGCCTGCAAAACAAATCGCACCTGATGGAAGAGTTGAAGAA
AATCGTCCGCGTGATGAAGAAACTCGACGTTGAAGCTCCGCATGAAGTTATGCTGACCATCGATGCCAGCACCGGGCAGA
ATGCGGTAAGCCAGGCCAAACTGTTCCACGAAGCCGTTGGCTTAACCGGCATCACGCTAACGAAACTGGACGGCACGGCG
AAAGGCGGGGTAATTTTCTCGGTGGCTGACCAGTTTGGTATCCCTATCCGCTACATTGGTGTCGGCGAACGTATTGAGGA
TTTGCGTCCGTTTAAGGCGGACGACTTTATAGAGGCACTTTTTGCCCGAGAGGATTAACAATGATTCGCTTTGAACATGT
CAGCAAGGCTTATCTCGGTGGGAGACAGGCGCTGCAGGGCGTTACGTTCCATATGCAGCCGGGTGAGATGGCGTTTCTGA
CCGGTCATTCCGGCGCAGGGAAAAGTACCCTCCTGAAGCTGATCTGTGGGATTGAGCGGCCCAGCGCCGGGAAAATCTGG
TTTAGCGGCCATGACATCACGCGTCTGAAAAACCGTGAAGTTCCGTTTCTGCGCCGCCAGATTGGCATGATTTTCCAGGA
TCACCATCTACTGATGGACCGTACTGTCTATGATAACGTGGCGATCCCGCTGATTATCGCCGGTGCCAGCGGTGATGACA
TTCGTCGCCGGGTGTCGGCGGCGCTGGATAAAGTCGGGCTACTGGACAAAGCGAAGAACTTCCCTATTCAGCTTTCCGGC
GGTGAACAACAGCGTGTTGGCATTGCCCGCGCGGTGGTGAACAAGCCCGCGGTACTGCTGGCGGACGAACCGACTGGTAA
CCTGGACGACGCGCTGTCGGAAGGCATTTTACGTCTGTTTGAAGAGTTTAACCGCGTTGGGGTAACCGTATTGATGGCAA
CGCACGACATCAACCTGATTTCGCGACGTTCCTATCGTATGCTCACCCTGAGCGATGGTCACTTGCATGGAGGCGTGGGC
CATGAATAAGCGCGATGCAATCAATCATATTCGGCAGTTTGGCGGGCGTCTGGATCGCTTCCGTAAATCGGTCGGCGGCT
CTGGCGACGGCGGTCGTAACGCGCCGAAACGCGCGAAATCCTCGCCAAAACCGGTAAATCGCAAAACCAACGTTTTCAAC
GAACAGGTACGCTATGCCTTCCACGGCGCATTGCAGGATCTGAAAAGCAAACCGTTCGCCACGTTTTTAACGGTGATGGT
TATCGCCATCTCCCTGACGCTGCCCAGCGTCTGTTATATGGTGTACAAAAACGTTAACCAGGCGGCGACGCAATATTATC
CGTCACCGCAAATCACTGTTTATCTGCAAAAAACGCTGGATGATGACGCCGCTGCGGGCGTGGTGGCACAGTTGCAGGCC
GAGCAAGGCGTGGAGAAAGTGAATTATCTTTCTCGTGAAGACGCACTGGGCGAGTTCCGTAACTGGTCTGGTTTTGGTGG
TGCGCTGGATATGCTGGAAGAAAACCCGCTTCCGGCAGTAGCGGTGGTGATCCCGAAACTCGATTTTCAGGGGACGGAGT
CACTGAATACGCTGCGTGATCGTATCACGCAGATTAACGGCATTGACGAAGTGCGGATGGATGACAGCTGGTTTGCCCGC
CTGGCGGCGTTGACCGGGCTGGTCGGGCGCGTTTCGGCAATGATCGGCGTATTGATGGTGGCGGCAGTGTTCCTCGTCAT
CGGTAACAGTGTGCGCCTGAGTATCTTTGCTCGCCGTGATTCTATTAACGTGCAGAAACTGATTGGTGCGACGGATGGTT
TCATCCTGCGTCCGTTCCTGTACGGTGGCGCATTGCTGGGATTTTCTGGCGCATTGTTGTCACTAATTTTGTCAGAAATT
CTGGTGCTGCGTTTGTCATCGGCGGTTGCGGAAGTGGCACAGGTTTTCGGAACGAAGTTTGATATCAATGGCTTATCGTT
CGATGAATGCCTGCTATTGCTGCTGGTATGCTCGATGATTGGCTGGGTGGCAGCGTGGCTTGCCACGGTACAACATTTAC
GCCACTTTACGCCTGAATAATAAAAGCGTGTTATACTCTTTCCCTGCAATGGGTTCCGTAGCAGGGAAAGAGACCCCGTT
GTCTCTTCCCGGTATTTCATCTCTATGTCACATTTTGTGCGTAATTTATTCACAGCGTTGCATTGAACTTGTGGATAAAA
TCACTGTCTGATAAAACAGTGAATGATAACCTCGTTGCTCTTAAGCTCTGGCACAGTTGTTGCTACCACTGAAGCGCCAG
AAGATATCGATTGAGAGGATTTGAATGACTGACAAAATGCAAAGTTTAGCCTTAGCCCCAGTTGGCAACCTGGATTCCTA
CATCCGGGCAGCTAACGCGTGGCCGATGTTGTCGGCTGACGAGGAGCGGGCGCTGGCTGAAAAGCTGCATTACCATGGCG
ATCTGGAAGCAGCTAAAACGCTGATCCTGTCTCACCTGCGGTTTGTTGTTCATATTGCTCGTAATTATGCGGGCTATGGC
CTGCCACAGGCGGATTTGATTCAGGAAGGTAACATCGGCCTGATGAAAGCAGTGCGCCGTTTTAACCCGGAAGTGGGTGT
GCGCCTGGTCTCCTTCGCCGTTCACTGGATCAAAGCAGAGATCCACGAATATGTTCTGCGTAACTGGCGTATCGTCAAAG
TTGCGACCACCAAAGCGCAACGCAAACTGTTCTTCAACCTGCGTAAAACCAAGCAGCGTCTGGGCTGGTTTAACCAGGAT
GAAGTCGAGATGGTGGCCCGTGAGCTGGGCGTAACCAGCAAAGACGTACGTGAGATGGAATCACGTATGGCGGCACAGGA
CATGACCTTTGACCTGTCTTCCGACGACGATTCCGACAGCCAGCCGATGGCTCCGGTGCTCTATCTGCAGGATAAATCAT
CTAACTTTGCCGACGGTATTGAAGATGATAACTGGGAAGAGCAGGCGGCAAACCGTCTGACCGACGCGATGCAAGGTCTG
GACGAGCGTAGCCAAGATATCATCCGCGCGCGCTGGCTGGACGAAGACAACAAGTCCACGTTGCAGGAACTGGCTGACCG
TTACGGTGTTTCCGCTGAGCGTGTGCGCCAGCTGGAAAAGAACGCGATGAAAAAATTGCGCGCTGCTATTGAAGCGTAAT
TTCCGCTATTAAGCAGAGAACCCTGGATCAGAGTCCGGGGTTTTTGTTTTTTGGGCCTCTACAATAATCAATTCCCCTTC
CGGCAAAACGCCAATCCCCACGCAGATTGTTAATAAACTGTCAAAATAGCTATTCCAATATCATAAAAATGGGGTATGTT
TTAGCAGAGTATGCTGCTAAAGCACGGGTAGCTACGTATAAAACGAAATAAAGTGCTGCACAACAACATCACAACACACG
TAATAACCAGAAGAGTGGGGATTCTCAGGATGAACATAAAGGGTAAAGCGTTACTGGCAGGATGTATCGCGCTGGCATTC
AGCAATATGGCTCTGGCAGAAGATATTAAAGTCGCCGTCGTAGGCGCAATGACCGGTCCGGTGGCGCAGTACGGTGACCA
GGAGTTTACTGGCGCAGAGCAGGCGGTTGCGGATATCAATGCTAAAGGTGGTATCAAAGGTAACAAACTGCAAATCGTAA
AATATGACGATGCCTGTGACCCGAAACAGGCGGTTGCGGTGGCGAACAAAGTCGTTAACGACGGCATTAAATACGTGATT
GGTCACCTCTGCTCTTCATCAACGCAGCCAGCGTCTGACATCTACGAAGACGAAGGCATTTTAATGATCACCCCAGCGGC
AACCGCACCAGAGCTGACCGCCCGTGGCTATCAGCTGATCCTGCGCACCACCGGCCTGGACTCCGACCAGGGGCCGACGG
CGGCGAAATATATTCTTGAGAAAGTGAAACCGCAACGCATTGCTATCGTTCACGACAAACAGCAGTACGGCGAAGGTCTG
GCGCGTGCAGTGCAGGACGGCCTGAAGAAAGGCAATGCTAACGTGGTGTTCTTTGATGGCATCACCGCCGGGGAAAAAGA
TTTCTCTACCCTGGTGGCGCGTTTGAAGAAAGAGAATATCGATTTCGTTTACTACGGCGGTTATCACCCGGAAATGGGGC
AAATCCTGCGTCAGGCACGCGCGGCAGGGCTGAAAACTCAGTTTATGGGGCCAGAAGGCGTGGCTAACGTCTCGCTGTCT
AACATTGCGGGCGAATCAGCGGAAGGGCTGCTGGTGACCAAGCCGAAGAACTACGATCAGGTTCCGGCGAACAAACCGAT
TGTTGACGCGATCAAAGCGAAAAAACAGGACCCAAGCGGCGCGTTCGTCTGGACCACCTACGCCGCGCTGCAATCTTTGC
AAGCGGGGCTGAATCAGTCTGACGATCCGGCGGAGATCGCTAAATACCTGAAAGCGAACTCGGTGGATACCGTGATGGGG
CCGCTGACCTGGGATGAGAAAGGCGATCTGAAAGGCTTTGAGTTCGGTGTGTTTGACTGGCACGCCAACGGCACGGCGAC
TGATGCGAAGTAATCATTAATCGGCAACTTTGGGTTGCCGCCAAATTGCTAATATCGAGTACGTTGCTTCATGCCGGATG
CGGCGTAAACGCCTTATCCGGCCTACAAGATTCAAAGAAATCAGTAAGTTGCAGCACACATTGTAGGCCTGATAAGCGTA
GCGCATCAGGCAATATCACTTTTGAAATCAAACTTGACGATTAATGCTTCTCCCAGCCACCCTGTTGTGCCGTAAATCCC
AGTGCTCGCATAAACGCTGTCATCACGCCGCGATCTTCCACGCCAGCATCCGCCATCCACCAACATGAAACGCCAGGATT
GTTACGCAAAACCTCTTCCAGCAGATATTGCCCCACACCGCGACGTCGGGTGACTTCCCGCACGCGTAGAGAATCCAGTG
CCCCCTCGGTGCCGCTTAAGGTTACCCGCACGGCAGCGAGCAGGCGCTCGTTAAAACGCGCGGCGTAGATACGGTAGTTA
TCGTCAACCTGTAAAGAGGAAGGGGAATACTCCGGCCAGATCTTTTGCAGGTCAATCCGGTCCTGGTCGCTAAAGTTTTC
TAATCGAATGATGGTCAGCTTCATGGGGAACCCGTGTAAATCACAAAAGTGGAACCAGTGTAGCGAAATAATTTAATCGG
AGGCTTTCTCTTTTTTATTTCTTTTGGCAGGTGATTAATTTTTTTTCAGCAATAATTACAAAGTTAAAACATTAGAGAAT
GAAAAATATCCAGCATAATCCCCTAAATGGTAGTGAATTATTCTGCCCTTTGTACCGTTATTTTATGCTGACAAGGGCGC
TTTTTTCTGTTTATCTATCAATAAATTCAGAATATTATCTGTTCTTAATCGACTGAAAAATAGGGATTTTAATCGCTATC
ATCACAAAATACTGCGCTAAACCCTTAATCAGACAGGTAAAAACAGTGCAGTATAAAAAAAGAACAGTCTGATTTGTTAA
CACATAAGAACAAAGCAACACAACATCACGAATGGGGATTTTTGACTATGAAACGGAATGCGAAAACGATCATCGCAGGG
ATGATTGCACTGACAATTTCACACACCGCTATGGCTGACGATATTAAAGTCGCCGTTGTCGGCGCGATGTCCGGCCCGAT
TGCCCAGTGGGGCGATATGGAATTTAACGGCGCGCGTCAGGCAATTAAAGACATTAATGCCAAAGGGGGAATTAAGGGCG
ATAAACTGGTTGGCGTGGAATATGACGACGCCTGCGACCCGAAACAAGCCGTTGCGGTCGCCAACAAAATCGTTAACGAC
GGCATTAAATATGTTATTGGTCATCTGTGTTCCTCCTCTACCCAACCTGCATCAGATATCTATGAAGACGAAGGTATTCT
GATGATCTCGCCGGGAGCGACCAATCCGGAGCTGACCCAACGCGGTTATCAATACATCATGCGTACTGCCGGGCTGGACT
CTTCCCAGGGGCCAACGGCGGCAAAATACATTCTTGAGACGGTGAAGCCCCAGCGCATCGCCATCATTCACGACAAACAA
CAGTATGGCGAAGGGCTGGCACGTTCGGTGCAGGACGGGCTGAAAGCGGCTAACGCCAACGTCGTCTTCTTCGACGGCAT
TACCGCTGGAGAGAAAGATTTCTCCGCGCTGATCGCCCGCCTGAAAAAAGAAAACATCGACTTCGTTTACTACGGCGGTT
ACTACCCGGAAATGGGGCAGATGCTGCGCCAGGCCCGTTCCGTTGGCCTGAAAACCCAGTTTATGGGGCCGGAAGGTGTC
GGTAATGCGTCACTGTCGAACATTGCCGGTGATGCCGCTGAAGGCATGTTGGTCACCATGCCAAAACGCTATGACCAGGA
GCCGACAAACCAGGGCATCGTTGATGCGCTGAAAGCAGACAAGAAAGATCCGTCCGGGCCCTATGTCTGGATCACCTACG
CGGCGGTGCAATCTCTGGCAACTGCCCTTGAACGTACTGGCAGCGATGAGCCGCTGGCGCTGGTGAAAGATTTAAAAGCT
AACGGTGCAAACACCGTAATTGGGCCGCTGAACTGGGATGAAAAAGGCGATCTTAAGGGATTCGATTTTGGTGTCTTCCA
GTGGCATGCCGACGGTTCATCCACGGCAGCCAAGTGATCATCCCACCGTTCGTGAAAAACGGGCGGGTTTAGAAAGGTTA
CCTTATGTCTGAGCAGTTTTTGTATTTCTTGCAGCAGATGTTTAACGGCGTCACGCTGGGCAGTACCTACGCGCTGATAG
CCATCGGCTACACCATGGTTTACGGCATTATCGGCATGATCAACTTCGCCCACGGCGAGGTTTACATGATTGGCAGCTAC
GTCTCCTTTATGATCATCGCCGCACTGATGATGCTGGGCATTGATACCGGCTGGCTGCTGGTGGCGGCGGGATTCGTCGG
CGCAATCGTCATTGCCAGCGCCTACGGCTGGAGTATCGAACGGGTAGCCTATCGCCCGGTGCGCAACTCTAAGCGCCTGA
TTGCACTCATCTCGGCAATCGGTATGTCTATCTTCCTGCAAAACTACGTTAGCCTGACCGAAGGTTCGCGCGACGTGGCG
CTGCCCAGCCTGTTTAACGGTCAGTGGGTAGTGGGTCATAGCGAAAACTTCTCTGCCTCTATTACTACCATGCAGGCGGT
TATCTGGATTGTCACCTTCCTCGCCATGCTGGCACTGACGATTTTCATTCGCTATTCCCGTATGGGGCGAGCCTGCCGTG
CCTGCGCGGAAGATCTGAAAATGGCGAGCCTGCTTGGCATCAACACCGACCGGGTGATTGCGCTGACCTTTGTGATTGGC
GCGGCGATGGCGGCAGTGGCGGGCGTGCTGCTCGGTCAGTTCTACGGCGTAATTAACCCCTACATCGGCTTTATGGCCGG
GATGAAAGCCTTTACCGCTGCGGTGCTCGGTGGGATTGGCAGCATTCCGGGGGCGATGATTGGCGGGCTGATCCTGGGGA
TTGCGGAGGCGCTCTCTTCTGCCTATCTGAGTACGGAATATAAAGATGTGGTCTCATTCGCCCTGCTGATCCTGGTGCTG
CTGGTGATGCCGACCGGTATTCTGGGGCGCCCGGAGGTAGAGAAAGTATGAAACCGATGCATATTGCAATGGCGCTGCTC
TCTGCCGCTATGTTCTTTGTGCTGGCGGGCGTCTTTATGGGCGTGCAACTGGAGCTGGATGGCACCAAACTGGTGGTCGA
CACGGCTTCAGAGATCCGTTGGCAGTGGGTGTTTATCGGCACGGCGGTGGTCTTTTTCTTCCAGCTTGTGCGGCCTGCTT
TCCAGAAAGGGCTAAAAAGCGTTTCCGGGCCGAAGTTTATTCTGCCCGCGATTGATGGCTCCACGGTGAAGCAGAAACTG
TTCCTCGTGGCGCTGCTGGTGCTTGCAGTGGCGTGGCCATTTATGGTGTCGCGTGGGACGGTGGATATCGCCACTCTGAC
CATGATCTACATTATTCTCGGTCTCGGGCTGAACGTGGTTGTTGGTCTTTCTGGTCTGCTGGTGCTGGGATACGGCGGCT
TTTACGCCATCGGCGCTTACACTTTTGCGCTGCTCAATCACTATTACGGTCTGGGCTTCTGGACCTGTCTGCCGATTGCC
GGGTTAATGGCGGCGGCGGCGGGCTTCCTGCTCGGTTTTCCGGTGCTGCGTCTGCGCGGTGACTATCTGGCGATCGTTAC
CCTCGGGTTCGGCGAAATTGTGCGCATATTGCTGCTCAATAACACCGAAATTACCGGCGGACCGAACGGTATCAGTCAGA
TTCCGAAACCGACGCTCTTCGGACTCGAGTTCAGCCGTACCGCCCGTGAAGGCGGCTGGGACACGTTCAGTAATTTCTTT
GGCCTGAAATACGATCCCTCCGATCGCGTCATTTTCCTCTACCTGGTGGCGTTGCTGCTGGTGGCGTTAAGCCTGTTTGT
CATTAACCGCCTGCTGCGGATGCCGCTGGGGCGTGCGTGGGAAGCGTTGCGTGAAGATGAAATCGCTTGTCGTTCGCTGG
GCTTAAGCCCGCGTCGTATCAAGCTGACTGCCTTTACCATCAGCGCTGCGTTTGCCGGTTTTGCCGGAACGTTGTTTGCT
GCGCGCCAGGGCTTTGTCAGCCCTGAATCCTTCACTTTTGCCGAATCGGCGTTTGTGCTGGCGATAGTGGTGCTCGGCGG
TATGGGCTCGCAGTTTGCAGTGATTCTGGCGGCTGTTTTGCTGGTGGTATCGCGCGAGTTGATGCGTGATTTCAACGAAT
ACAGCATGTTAATGCTCGGTGGTTTGATGGTGCTGATGATGATCTGGCGTCCGCAGGGCTTGCTGCCCATGACGCGCCCG
CAACTCAAGCTGAAAAACGGCGCAGCAAAAGGAGAGCAGGCATGAGTCAGCCATTATTATCTGTTAACGGCCTGATGATG
CGCTTCGGCGGCCTGCTGGCGGTGAACAACGTCAATCTTGAACTGTACCCGCAGGAGATCGTCTCGTTAATCGGCCCTAA
CGGTGCCGGAAAAACCACGGTCTTCAACTGCCTGACCGGATTCTATAAACCCACCGGCGGCACCATTTTACTGCGCGATC
AGCACCTGGAAGGTTTACCGGGGCAGCAAATTGCCCGCATGGGCGTGGTGCGCACCTTCCAGCATGTACGTCTGTTCCGT
GAAATGACGGTGATTGAAAACCTGCTGGTGGGACAGCATCAGCAACTGAAAACCGGGCTGTTCTCCGGCCTGTTGAAAAC
ACCCTCTTTCCGTCGCGCCCAGAGCGAAGCGCTCGACCGCGCCGCCACCTGGCTTGAGCGCATTGGTTTGCTGGAACATG
CCAACCGTCAGGCGAGTAACCTGGCCTATGGTGACCAGCGCCGTCTGGAGATTGCCCGCTGTATGGTAACGCAGCCGGAG
ATTTTAATGCTCGACGAACCGGCAGCAGGTCTTAACCCGAAAGAGACGAAAGAGCTGGATGAGCTGATTGCCGAACTGCG
TAACCATCACAACATCACTATCTTGTTGATTGAACATGATATGAAGCTGGTGATGGGGATTTCAGACAGAATTTACGTGG
TCAATCAGGGGACGCCGCTGGCAAACGGTACACCGGAGCAGATCCGTAATAACCCGGACGTGATCCGTGCCTATTTAGGT
GAGGCATAAGATGGAAAAAGTCATGTTGTCCTTTGACAAAGTCAGCGCCCACTACGGCAAAATCCAGGCGCTGCATGAGG
TGAGCCTGCATATCAATCAGGGCGAGATTGTCACCCTCATTGGCGCGAACGGGGCGGGGAAAACCACCTTGCTCGGCACG
TTATGCGGCGATCCGCGCGCCACCAGCGGGCGAATTGTGTTTGATGATAAAGACATTACCGACTGGCAGACGGCGAAAAT
CATGCGCGAAGCGGTAGCGATTGTCCCGGAAGGGCGTCGCGTCTTCTCGCGGATGACGGTGGAAGAGAACCTGGCGATGG
GCGGCTTTTTTGCCGAACGCGACCAGTTCCAGGAGCGCATAAAGTGGGTCTATGAACTGTTTCCGCGTCTGCATGAGCGC
CGTGTTCAGCGAGCGGGCACTATGTCTGGCGGTGAACAGCAGATGCTGGCGATTGGTCGCGCTTTGATGAGTAACCCGCG
TTTGTTGTTGCTTGATGAGCCATCGCTCGGGCTGGCACCGATTATCATCCAGCAAATTTTCGACACCATCGAACAACTGC
GCGAGCAGGGGATGACCATCTTCCTTGTCGAGCAGAACGCCAACCAGGCGCTAAAGCTGGCGGATCGCGGCTACGTGCTG
GAAAACGGCCATGTAGTGCTCTCCGATACTGGCGACGCGCTGCTGGCGAATGAAGCGGTGAGAAGTGCGTATTTAGGCGG
GTAATAACACGTTGATTGATAAGGAGTCAAAAGACTCCTTTGAGACAGGTGACAAATGTAAAATTGCCTGATGCGCTGCG
CTTATCAGTCCTACTGGGTGAGTTGCAATATATTGAATTTGCACGATCTTGTAGGCCGGATAAGGCGTTTACGCCGCATC
CGGCATGAAACGATGAGTAATCTGTAGAGTTTGATTCAGACCTTCTATTTTTCCGCTTATCCGTGCCCCATCTCCCATTT
TCCCTCGCTCGCGCCGTCACCGCCTTGTCATCTTTCTGACACCTTACTATCTTAAAAATGTAACAAAATAGTTATTTTTC
TGTAATTCGAGCATGTCATGTTACTCCGCGAGCATAAAACGCGTGAATTCGCGCATTCGGTACAACAAGAGAGATAATCA
ATGAAACCGTTACGTTATACAGCTTCAGCACTGGCGCTCGGACTGGCTTTAATGGCAAATGCGCAGGCAGTGACGACCAT
TCCGTTCTGGCATTCTATGGAAGGGGAACTGGGTAAAGAGGTGGATTCTCTGGCCCAACGTTTTAACGCCGAAAACCCGG
ATTACAAAATTGTACCGACCTATAAAGGCAACTACGAACAGAATTTAAGCGCGGGGATTGCCGCATTTCGTACCGGCAAC
GCTCCGGCTATTTTGCAGGTTTATGAAGTTGGCACCGCCACCATGATGGCGTCGAAAGCCATTAAACCGGTGTATGACGT
ATTTAAAGAGGCAGGGATTCAATTCGATGAGTCGCAGTTTGTGCCGACGGTTTCCGGTTACTACTCCGACAGCAAAACTG
GGCACTTACTTTCCCAGCCGTTCAACAGTTCGACCCCCGTTCTCTATTACAACAAAGACGCCTTCAAGAAAGCAGGATTA
GACCCGGAACAACCGCCGAAAACCTGGCAGGATCTGGCGGACTATGCCGCAAAACTAAAAGCCTCCGGCATGAAGTGCGG
CTACGCCAGCGGCTGGCAGGGCTGGATCCAACTGGAAAACTTTAGCGCCTGGAACGGTCTGCCGTTTGCCAGCAAAAACA
ACGGTTTTGACGGCACAGACGCGGTGCTTGAGTTCAACAAGCCGGAGCAGGTGAAACACATCGCCATGCTCGAAGAGATG
AACAAGAAGGGCGATTTCAGCTACGTTGGGCGTAAGGATGAATCCACCGAGAAGTTCTATAACGGTGATTGCGCGATGAC
GACCGCCTCTTCCGGTTCTCTTGCCAACATTCGCGAGTACGCCAAATTTAACTATGGCGTAGGCATGATGCCTTACGACG
CCGATGCGAAAGACGCGCCGCAAAACGCCATTATCGGCGGAGCCAGTCTATGGGTAATGCAGGGTAAAGATAAAGAAACC
TACACCGGCGTGGCGAAGTTCCTCGACTTCCTCGCAAAACCAGAAAACGCTGCCGAGTGGCATCAGAAAACCGGTTATCT
ACCAATCACCAAAGCGGCGTATGACCTGACCCGTGAGCAGGGCTTTTACGAGAAAAACCCAGGAGCGGATATTGCCACGC
GTCAGATGCTGAACAAGCCACCGTTGCCGTTCACCAAAGGTTTGCGTCTGGGCAACATGCCGCAGATCCGCGTGATTGTG
GATGAAGAGCTGGAGAGCGTGTGGACCGGTAAGAAGACACCACAGCAGGCGCTGGATACTGCCGTTGAGCGTGGGAACCA
GTTACTGCGCCGCTTTGAGAAATCGACGAAGTCTTAATCAGTGTAATGTCGGATGCGTTTCGCTTATCTGACCTGGCATC
GCGTGTAGGCCGGATAAGCGAAGCGCATCCGGCACAGTTCAGGAATTAACTGTAATGTCATCATCCCGTCCGGTGTTCCG
CTCGCGCTGGCTGCCTTATTTGCTGGTCGCGCCGCAGCTCATCATCACCGTTATCTTTTTTATCTGGCCTGCGGGCGAAG
CGTTGTGGTACTCGCTACAAAGCGTCGATCCGTTTGGTTTCTCCAGCCAGTTTGTCGGCCTGGATAATTTCGTCACGCTG
TTTCATGACAGCTACTATCTCGACGCCTTCTGGACGACGATAAAATTCAGCACCTTTGTCACCGTCAGCGGTTTGCTGGT
ATCGCTGTTCTTCGCAGCGCTGGTGGAGTACATCGTGCGCGGCAGTCGTTTCTATCAAACTTTGATGCTGCTGCCGTATG
CCGTGGCTCCCGCCGTTGCCGCCGTATTGTGGATCTTTCTGTTTAACCCCGGTCGCGGGCTGATCACCCATTTTCTCGCT
GAGTTCGGCTACGACTGGAACCACGCGCAAAACAGCGGTCAGGCGATGTTCCTGGTGGTGTTTGCCTCAGTGTGGAAGCA
AATCAGCTACAACTTTCTGTTCTTCTATGCCGCGCTGCAATCCATCCCCCGTTCGTTGATCGAAGCCGCAGCCATTGATG
GGGCAGGGCCGATTCGCCGCTTCTTTAAGATTGCGCTGCCGCTTATCGCTCCGGTGAGTTTCTTCCTGCTGGTGGTGAAC
CTGGTGTATGCCTTCTTCGACACCTTCCCGGTGATCGACGCCGCCACCTCCGGCGGGCCAGTACAGGCCACCACGACGCT
GATTTATAAGATCTACCGTGAAGGCTTTACCGGACTGGATTTGGCTTCGTCTGCCGCGCAGTCGGTGGTGTTGATGTTCC
TCGTCATCGTGCTGACGGTGGTGCAGTTCCGCTATGTTGAAAGCAAGGTGCGTTACCAATGATTGAGAACCGTCCGTGGC
TGACAATATTCAGCCATACCATGCTGATCCTCGGGATCGCGGTGATCCTTTTCCCGCTGTACGTGGCGTTTGTCGCGGCG
ACGCTGGATAAACAAGAAGTCTATGCCGCACCGATGACGCTAATCCCCGGCACACATCTGCGGGAAAACATCCACAACAT
CTGGGTAAACGGGGTAGGCACGAATAGCGCGCCGTTCTGGCGGATGTTGCTTAACAGCTTTGTGATGGCGTTCAGCATTA
CGCTCGGCAAAATTACCGTCTCGATGCTCTCGGCATTTGCCATTGTCTGGTTTCGTTTTCCGCTACGTAACCTCTTCTTC
TGGATGATTTTTATCACCCTGATGCTGCCGGTTGAAGTGCGTATCTTCCCGACGGTGGAAGTCATCGCCAACCTGAAAAT
GCTCGACAGCTACGCAGGTTTAACGCTGCCGCTGATGGCCTCGGCGACCGCCACGTTTCTGTTTCGCCAGTTCTTTATGA
CCCTACCGGATGAACTGGTGGAAGCCGCGCGGATCGACGGCGCGTCGCCAATGCGTTTATTTTGCGACATCGTTTTTCCG
CTGTCCAAAACTAATCTGGCGGCGCTGTTTGTGATCACCTTTATTTACGGCTGGAACCAGTATTTGTGGCCGTTGTTGAT
TATTACCGACGTTGATCTCGGCACCACCGTGGCAGGGATTAAAGGGATGATCGCCACAGGCGAAGGCACAACGGAATGGA
ACTCGGTGATGGCGGCGATGTTGTTAACCCTGATCCCACCAGTAGTGATTGTTTTAGTGATGCAGCGTGCCTTCGTGCGC
GGCCTGGTCGATAGTGAGAAATAAGATGGCAGGACTGAAATTACAGGCAGTAACCAAAAGCTGGGATGGCAAAACCCAGG
TCATTAAACCGCTGACCCTTGATGTGGCGGATGGCGAATTTATCGTGATGGTCGGGCCGTCTGGCTGCGGGAAATCGACG
TTATTGCGAATGGTGGCCGGACTGGAGCGGGTAACGACGGGCGATATCTGGATCGACCGCAAGCGTGTCACCGAAATGGA
GCCGAAAGATCGCGGGATTGCGATGGTGTTCCAGAACTACGCGCTCTATCCGCATATGAGCGTAGAGGAGAACATGGCGT
GGGGGCTGAAAATTCGCGGCATGGGCAAGCAACAAATTGCCGAACGTGTTAAAGAAGCGGCGCGCATTCTGGAGCTGGAC
GGCCTGCTTAAGCGCCGCCCGCGTGAGCTTTCCGGCGGTCAGCGCCAGCGTGTGGCGATGGGGCGTGCGATTGTGCGTGA
GCCGGCAGTGTTCCTGTTTGATGAGCCGCTCTCTAACCTCGATGCCAAGTTGCGTGTGCAGATGCGTCTTGAACTGCAAC
AGCTGCACCGTCGCCTGAAAACGACTTCACTCTACGTTACCCACGATCAGGTTGAGGCGATGACGCTCGCCCAGCGAGTA
ATGGTGATGAACGGCGGCATCGCCGAACAGATTGGCACGCCAGTTGAAGTGTACGAAAAGCCCGCCAGCCTGTTTGTGGC
GAGTTTTATCGGCAGCCCGGCGATGAACCTACTGGCTGGCCGCGTGAATAACGAAGGTACGCATTTCGAACTGGATGGTG
GTATTACGCTGCCGCTAAACGGTGGCTACCGTCAGTATGCCGGGCGTAAAATGACCCTCGGCATTCGCCCGGAACATATA
GCGCTAAGCTCGCAGGCAGAAGGTGGTGTGCCGCTGGTGATGGACACGCTGGAGATCCTCGGCGCAGATAACCTGGCGCA
CGGACGTTGGGGCGAACAGAAGCTGGTGGTGCGACTGGCACATCAGGAGCGCCCGACGGCAGGCAGCACGCTGTGGCTGC
ATCTGCCGGAAAATCAGCTGCATCTTTTTGATGGTGAAACAGGACAACGAGTATGAGTAACTGGCCTTATCCCCGCATCG
TCGCCCATCGTGGTGGCGGTAAGCTGGCCCCGGAAAACACCCTGGCAGCAATCGACATCGGGGCAAAATACGGTCATAAG
ATGATCGAATTTGACGCAAAGTTATCGAAAGATGGCGAGATCTTCCTGCTCCATGACGACAATCTTGAACGCACCAGCAA
CGGCTGGGGCGTCGCGGGTGAACTGAACTGGCAGGATTTACTGCGCGTGGATGCAGGCAGTTGGTACAGCAAAGCGTTTA
AAGGTGAGCCGCTGCCATTGCTTTCGCAGGTGGCGGAACGTTGTCGCAAACACGGGATGATGGCGAATATCGAAATCAAA
CCCACCACTGGCACCGGACCATTAACGGGCAAAACGGTGGCGTTGGCGGCACGCGAACTGTGGACCGGTATGACGCCGCC
GCTGCTGTCATCGTTTGAGATTGATGCTTTAGAAGCCGCGCAACAGGCAGCACCGGAACTGCCGCGTGGTTTATTGCTTG
ATGAATGGCGCGACGACTGGCGAGAATTGACCGCGCGGCTGGGCTGCGTCTCTATTCATCTCAATCATAAGTTGCTCGAT
AAAGCGCGAGTGATGCAGTTGAAAGACGCCGGATTACGGATTCTGGTTTATACCGTCAATAAACCCCAGCGCGCGGCAGA
GTTGCTGCGCTGGGGCGTGGATTGCATCTGTACCGATGCGATTGACGTGATTGGTCCGAACTTTACGGCCCAATAGTTTT
CAACGGAATGTCAGGCTGCGGCGTGCTGGGCTGATTCAGCATGTCGCCGTTTCTCCTCTCCGGCAGCATATGCTGCTGAT
TCAACGAACTATCCGGATTACGGTTGCTGTTTAACATCCCGCCGTTGGTGTTGGGCAGCATTTGCTGCCGGGCGGGATTT
CGCTCCCCCGGCTGTGACTGCAACACCCGCTGAGAATTATTGTTTATCTGGTTTTCTAAATGCTGCTGTTGCAGCTGCGT
TTGCGTTTTCAGTTGCTGGTTCAGCATCCCTTTTTGCTGGATTTGCTGCGTCTGCATTTGAGTTTGCATCCGCTGCTGGC
TGGGGATCTGATATCCCGGCTGGTTAGGGTTGTTCAGAGTATTAATGGGCTGTGCAAAGCCGACAAACGGCAGGAGTGCC
GTCAAAAGCAGAAGTCGTTTCATCGCGTATCCTCCTCTGAAGATATTCTTTAAGTTTACTCGCTTCCCGGCAAAACGATG
ATTAATTCAGAGTTATATACCAGGCTTAGCTGGGGTTGCCCCTTAATCTCTGGAGAATAACGATGATAAAACCGACGTTT
TTACGCCGGGTGGCCATTGCTGCTCTGCTCACAGGAAGTTGTTTTAGTACGGTAGCCGCGCCACCTGTTTCTTATGGTGT
GGAGGAAGATGTCTTCCATCCGGTACGCGCTAAGCAGGGAATGGTGGCGTCTGTAGATGCTACTGCCACTCAGGTGGGGG
TGGATATCCTCAAGGAGGGCGGGAATGCCGTTGATGCTGCCGTGGCGGTGGGCTACGCGCTGGCAGTAACGCATCCGCAG
GCAGGGAATCTGGGCGGCGGTGGTTTTATGCTGATCCGCTCGAAAAATGGCAATACCACGGCTATCGATTTCCGCGAAAT
GGCACCCGCCAAAGCGACCCGCGATATGTTCCTCGATGATCAGGGCAACCCGGACAGCAAAAAATCACTCACTTCGCATC
TGGCTTCCGGCACACCCGGTACGGTAGCGGGTTTCTCGTTGGCGCTGGATAAATACGGCACCATGCCGTTGAATAAAGTG
GTGCAACCGGCGTTTAAACTGGCACGCGATGGTTTTATCGTTAACGACGCGCTGGCTGACGATCTCAAAACCTACGGCAG
TGAAGTGCTGCCGAACCACGAAAACAGCAAAGCTATCTTCTGGAAAGAGGGCGAACCGCTGAAAAAGGGCGACAAGCTGG
TGCAGGCGAACCTGGCAAAGAGCCTGAAGATGATTGCCGAAAACGGCCCGGATGAATTCTACAAAGGCACGATAGCGGAA
CAGATTGCCCAGGAGATGCAGAAAAACGGTGGCTTGATCAGCAAAGAAGATTTAGCGGCATATAAAGCGGTCGAACGCAC
ACCGATAAGCGGCGATTATCGCGGGTATCAGGTTTACTCCATGCCACCGCCATCTTCCGGCGGTATTCATATCGTACAAA
TCCTCAATATTCTGGAAAACTTCGATATGCAGAAGTACGGCTTTGGCAGCGCCGACGCGATGCAAATCATGGCAGAAGCT
GAGAAATACGCCTATGCCGACCGCTCGGAATATCTTGGCGACCCGGATTTTGTCAAAGTACCGTGGCAGGCGCTGACCAA
TAAAGCCTATGCCAAATCTATTGCCGATCAAATCGATATCAATAAAGCGAAGCCATCCAGCGAAATTCGTCCTGGCAAGC
TTGCGCCTTATGAGAGTAATCAAACTACCCATTACTCAGTAGTGGATAAAGACGGTAACGCCGTGGCGGTGACCTATACG
CTGAACACCACCTTCGGTACGGGCATTGTCGCGGGCGAGAGCGGTATTTTGCTCAATAACCAGATGGATGATTTCTCCGC
CAAACCAGGCGTACCGAACGTTTACGGGCTGGTGGGCGGCGATGCCAACGCCGTCGGGCCGAATAAACGCCCGCTGTCGT
CGATGTCACCAACCATTGTGGTCAAGGATGGTAAAACCTGGCTGGTCACCGGAAGCCCAGGCGGTAGCCGGATTATCACC
ACTGTGCTGCAAATGGTAGTGAATAGCATCGATTATGGAATGAACGTCGCCGAAGCGACCAATGCGCCGCGTTTCCACCA
TCAGTGGTTGCCGGACGAGCTGCGTGTCGAAAAAGGGTTTAGCCCGGATACGATCAAGCTGCTGGAAGCAAAAGGTCAGA
AAGTGGCGCTGAAAGAGGCGATGGGCAGTACACAAAGCATTATGGTTGGGCCGGACGGTGAGCTGTACGGTGCATCCGAC
CCACGCTCGGTGGATGATTTAACGGCGGGGTATTAATATCTTAAGCCCTCTCCCGGTAGGTGAGGGCTTAAATGACAAAC
GTAGATTGCAAATTCTCTATTTCACCCGCGCCATATAATACGCATCGACATATTCACCATTACGCAGCGCGTACTTCTTG
CCAGTCCCTTCAATCTCAAAGCCAAATTTTTTATAGACCTTAATTGCTGGCGCGTTATCGACGAACACCGTTAGCTCAAT
ACGATCTACCCGCAACCAGTTGTCGCACATTTCAATCATCTCTCGCATCAGGGCGCTGGCGACGCCGCGGTTCTTCCAAC
GGGAGTCGACACAGATACCAAAATCGGCAACATGACTGCGGCGTGGGCGTTGTTGCACGTCAATGGTGAGATGGCCTACG
ACGATTCCATCAATACAGGCGACTAACTGCTTGATGCCAGGGCGAGCGGTGAGTCGTTCCAGCCACATTTGTTCTGAAGG
ATGAGGCACCTGTAGCGTGTTGTAATACACCTCCGGCTGGGCGTGAATCTGCCTGATAGCCTCGTAATCGCGTGTTTCTG
CGTGGCGTATTACTATCTCACTCATTCCTTTGTCCTCTTTGGGGTAAATGTCCCTTTCAACATCATTGACTTTCAAATGC
GAGTCAAATGCATTTTTTTGCAAAAAGTGTTGGACAAGTGCAAATGAGAATGATTATTATTGTCTCGCGATCAGGAAGAC
CCTCGCGGAGAACCTGAAAGCACGACATTGCTCACATTGCTTCCAGTATTACTTAGCCAGCCGGGTGCTGGCTTTTTTTT
TGACCTTTCGTTCTCAATTTATCCTCGGGAAGTGCTTGTGTTCGTTATGCGCACTCCAGTAGGAACCACGTCCGCTTTGC
GCTAAGGTGTAAATAACCACCTTAAAAAGGACGAAATCATGGTCATTAACTGCGCCTTTATTGGCTTCGGCAAAAGCACC
ACCCGTTACCATCTGCCGTATGTACTTAACCGCAAGGATAGCTGGCATGTCGCGCATATTTTTCGCCGCCATGCGAAGCC
GGAAGAACAGGCCCCCATTTATTCCCATATCCATTTCACCAGCGATCTCGACGAAGTGCTAAACGATCCCGATGTTAAGC
TGGTTGTCGTCTGCACCCACGCGGACAGCCACTTCGAGTACGCGAAGCGCGCGCTGGAAGCCGGGAAAAATGTGCTGGTC
GAAAAACCGTTCACTCCGACAATTGCGCAGGCGAAAGAGCTGTTTGCACTGGCGAAAAGCAAAGGGCTGATCGTTACGCC
GTATCAGAATCGTCGCTTTGATTCCTGCTTCCTGACAGCGAAAAAAGCGATTGAAAGCGGCAAGCTGGGAGAGATTGTCG
AAGTGGAAAGCCATTTTGACTATTACCGCCCGGTGGCAGAAACCAAACCGGGGCTACCGCAGGATGGCGCGTTCTATGGC
CTTGGTGTGCATACGATGGACCAGATTATTTCTCTGTTCGGTCGCCCGGATCACGTCGCTTATGACATCCGCAGCCTGCG
TAATAAAGCCAATCCGGACGACACCTTTGAAGCGCAGTTGTTTTATGGCGATCTAAAAGCCATCGTCAAAACCAGCCATC
TGGTGAAAATCGATTATCCGAAATTTATCGTTCACGGTAAGAAAGGTTCGTTTATTAAATACGGTATCGACCAGCAGGAA
ACTAGCCTGAAGGCTAATATTATGCCGGGCGAACCAGGATTCGCAGCGGATGATTCGGTCGGTGTGCTGGAGTATGTCAA
TGACGAGGGCGTGACGGTAAGAGAAGAGATGAAGCCAGAGATGGGCGATTATGGGCGCGTTTATGATGCGTTGTATCAAA
CCATTACCAACGGTGCGCCAAATTACGTCAAGGAATCTGAAGTTCTTACGAATCTGGAAATCCTTGAACGCGGTTTTGAG
CAAGCTTCTCCCTCCGCAGTGACTCTCGCGAGGTAAGTTTGATGGCCCCTCGAATAGTTCAATTTTTTTGAACAGAGGGG
TCAATTTTCACCCTCTATCATCCCAGGCGGATCGGGTCCACACTAAGCCCATCGAAATCATTCAGGGGGCGAATACAAAT
GATCTACTTACGCAAAGCAAATGAACGCGGTCATGCAAATCATGGCTGGCTGGACTCCTGGCATACTTTCTCTTTTGCCA
ACTATTACGATCCGAACTTTATGGGCTTCTCTGCGCTGCGCGTGATTAACGACGACGTGATTGAAGCAGGGCAGGGCTTC
GGCACTCACCCGCATAAAGATATGGAAATTTTGACCTACGTGCTGGAAGGTACTGTTGAGCACCAGGACAGCATGGGCAA
TAAAGAGCAGGTTCCGACGGGCGAGTTCCAGATTATGAGTGCGGGTACGGGTATTCGTCACTCAGAGTACAACCCAAGCA
GCACCGAGCGTCTGCATCTGTATCAGATCTGGATCATGCCTGAAGAAAACGGCATTACGCCGCGTTATGAACAGCGTCGC
TTCGATGCCGTGCAGGGCAAACAACTGGTGCTTTCGCCGGATGCGCGTGATGGTTCATTGAAAGTGCATCAGGATATGGA
ACTGTATCGTTGGGCGCTGGTGAAAGATGAGCAGTCGGTGCATCAGATTGCCGCTGAACGCCGCGTCTGGATCCAGGTGG
TGAAAGGCAATGTCACCATTAACGGCGTGAAAGCCTCGACCAGCGATGGTCTGGCAATCTGGGATGAGCAGGCGATTTCC
ATCCATGCTGATAGCGACAGTGAAATCCTGCTGTTCGATTTACCGCCAGTCTAAATTTATCTCACAAACCTTCCTGAGGA
ATCGGGAAGGTTGTGATGCGTCCGTGTTAAACTAAGAGAATCTATCTCTTTTGTACCTTCAGGACGATGAAAAAGAAAAG
ACCCGTACTTCAGGATGTGGCTGACCGTGTAGGCGTGACCAAAATGACGGTCAGCCGTTTTTTACGCAACCCGGAGCAGG
TTTCCGTCGCTCTACGCGGCAAGATTGCCGCCGCTCTTGATGAACTGGGTTATATTCCCAATCGCGCGCCCGATATACTC
TCTAACGCCACCAGCCGGGCGATTGGCGTCCTGTTACCTTCTCTCACCAACCAGGTTTTCGCGGAAGTATTACGCGGAAT
CGAAAGCGTCACCGACGCGCACGGTTATCAAACCATGCTGGCGCACTACGGTTATAAACCGGAAATGGAGCAAGAACGCC
TCGAATCAATGCTCTCATGGAATATCGACGGCCTGATCCTCACCGAACGTACCCACACGCCGCGTACCTTAAAGATGATT
GAAGTGGCGGGGATTCCGGTGGTGGAGTTGATGGACAGTAAGTCGCCGTGCCTCGATATCGCCGTCGGTTTTGATAACTT
TGAAGCGGCACGCCAGATGACCACCGCCATTATTGCTCGCGGGCATCGCCACATTGCCTATCTCGGCGCACGCCTCGACG
AACGTACTATCATCAAACAGAAGGGATACGAACAGGCGATGCTGGATGCAGGCCTGGTGCCGTATAGCGTGATGGTTGAG
CAATCTTCTTCTTACTCTTCCGGTATTGAACTGATTCGCCAGGCGCGGCGGGAATATCCGCAGCTGGATGGCGTGTTCTG
TACTAATGATGACCTGGCGGTCGGCGCGGCGTTTGAATGTCAGCGTCTGGGGTTGAAAGTTCCTGACGATATGGCGATTG
CCGGTTTCCACGGTCATGACATTGGTCAGGTGATGGAGCCACGGCTAGCGAGTGTGCTGACGCCGCGTGAGCGGATGGGC
AGCATTGGCGCTGAGCGCCTGCTGGCGCGTATTCGTGGCGAATCTGTGACACCGAAAATGTTAGATTTAGGTTTCACCTT
GTCACCGGGCGGATCTATTTAAGCCTACAAATTTGAAGTAGCTCACACTTATACACTTAAGGCACGGATGGATATTGCTT
CTGATATTGTCCGGCTGGACAATGTTACCGATAACAGTTACCCGTAACATTTTTAATTCTTGTATTGTGGGGGCACCACT
TTGAGCACGACTAACCATGATCACCACATTTACGTCTTGATGGGCGTATCGGGCAGCGGCAAATCTGCGGTCGCCAGTGA
AGTGGCGCATCAACTTCATGCCGCGTTTCTTGATGGCGATTTCCTCCATCCGCGCTGCAATATCGAAAAAATGGCGTCTG
GCGAACCGCTGAATGACGACGATCGCAAACCGTGGTTGCAGGCGCTGAACGACGCCGCGTTTGCTATGCAGCGCACCAAT
AAAGTATCGCTGATCGTCTGTTCTGCACTGAAAAAACACTATCGCGACTTGCTGCGTGAAGGTAATCCTAATCTCTCTTT
CATCTACCTGAAAGGCGATTTTGATGTGATTGAAAGCCGCCTGAAAGCGCGCAAAGGCCATTTCTTTAAAACCCAAATGC
TGGTGACGCAGTTTGAAACGCTGCAGGAGCCGGGTGCGGACGAAACCGATGTACTGGTGGTGGATATTGATCAACCGCTG
GAAGGTGTTGTGGCAAGCACCATTGAGGTTATTAAAAAAGGCAAATAAGTAGTGACTACATTAACGCTTGTTTTAACAGC
AGTAGGGTCTGTTTTACTGCTGCTGTTTTTAGTCATGAAGGCGCGTATGCACGCTTTCCTGGCTTTAATGGTGGTGTCCA
TGGGGGCTGGCCTTTTTTCCGGTATGCCGCTCGATAAAATCGCAGCGACGATGGAAAAAGGGATGGGAGGCACCCTCGGC
TTCCTGGCGGTGGTTGTCGCTCTGGGAGCCATGTTTGGTAAGATCTTACATGAAACCGGCGCGGTCGATCAGATTGCCGT
CAAAATGCTCAAATCCTTCGGTCACAGCCGCGTGCATTATGCTATCGGCCTTGCGGGGCTGGTTTGTGCGCTACCGCTGT
TCTTTGAAGTGGCGATTGTTCTGCTGATTAGCGTTGCTTTCTCAATGGCGCGCCACACCGGCACGAACCTGGTGAAGCTG
GTAATCCCATTATTTGCAGGCGTGGCGGCAGCGGCTGCGTTCCTGGTGCCTGGGCCAGCGCCAATGCTGCTGGCATCGCA
GATGAATGCCGATTTTGGCTGGATGATCCTGATTGGCCTGTGCGCGGCAATTCCGGGAATGATTATTGCCGGGCCGCTGT
GGGGTAATTTCATCAGCCGCTACGTGGAGTTGCATATTCCTGACGACATCAGCGAACCGCATCTCGGCGAAGGCAAAATG
CCGTCCTTCGGATTCAGCCTGTCGCTGATCCTGTTGCCACTGGTGCTGGTGGGGCTGAAAACCATTGCCGCGCGTTTTGT
GCCAGAAGGCTCTACTGCTTACGAATGGTTCGAGTTTATTGGTCATCCGTTTACCGCGATTCTGGTTGCTTGCCTGGTGG
CGATTTACGGTCTGGCAATGCGTCAGGGTATGCCAAAAGACAAAGTGATGGAGATTTGCGGTCACGCGCTGCAACCGGCG
GGGATCATTCTGCTGGTGATTGGTGCGGGCGGCGTGTTCAAACAGGTGCTGGTTGACTCTGGTGTCGGTCCGGCACTGGG
CGAAGCGTTAACCGGCATGGGCCTGCCGATTGCCATCACCTGCTTCGTGCTGGCAGCTGCAGTGCGCATCATTCAGGGTT
CTGCCACCGTTGCCTGTTTAACGGCGGTGGGATTGGTAATGCCGGTCATTGAACAACTGAACTACTCCGGTGCGCAAATG
GCGGCGCTGTCGATTTGTATCGCCGGTGGTTCGATTGTTGTCAGCCACGTTAACGACGCGGGTTTCTGGTTGTTCGGTAA
ATTTACCGGCGCGACCGAAGCCGAAACGCTTAAAACCTGGACCATGATGGAAACCATCCTCGGCACTGTCGGTGCCATCG
TTGGGATGATTGCGTTCCAGCTGTTGAGTTAAGTTTGTTTACCCGGTAGTTCTGACGCTACCGGGCTCTTTTCGAAAAAC
TCTCCTCGTTACCCCTTCATCCACATTCGAATGCCGTCGAGGAACATCTGAGTTGCCATCATCACCAGAATTAATCCCAT
CAGGCGTTCAAGTGCGTTCACCCCTTTCTCGCCCAGCAGACGTAAAAATAGCGAAGACTGTAGCAGGATGACAAAGGTGC
CGCCCCAGGCCAGTAGCAGAGCAATTACCAGATGCCCCATCTGATTCGGGTACTGATGAGACAACAACATCAGCGTGGCG
AGAATAGTCGGCCCGGCGACTAACGGAATTGCCAACGGCACGATAAATGGCTCTTCACCTGCCGGAAGCCCGCTGCTATT
TCCTGAAGCGCTGGGGAAAATCATCTTAATGGCGATCAGAAACAGAATGATGCCGCCAGAAATGGAGACGGTTTCTGCCC
GCAGGCTAAGAAATGCCAGAATTTTCTCGCCCGCAAACAGGAACACCAGCATCACAAGGAGAGCAATAAGCAACTCTCGC
ACCATGATTGCCCGCCGTCTTTTCGGTTCAGTATGTTTCAGTACGGACATGAAAATAGGTAGGTTTCCGAGCGGATCCAT
AATCAGGATCAATAAAACTGTTGCAGAAATGATTTCATTCATAACTCAAATTCCCTGATAATTGCCGCGGACTTTCTGCG
TGCTAACAAAGCAGGATAAGTCGCATTACTGATGGCTTCGCTATCATTGATTAATTTCACTTGCGACTTTGGCTGCTTTT
TGTATGGTGAAAGATGTGCCAGGAGGAGACCGGCACATTTATACAGCACACATCTTTGCAGGAAAAAACGCTTATGAAAA
ATGTTGGTTTTATCGGCTGGCGCGGTATGGTCGGCTCCGTTCTCATGCAACGCATGGTTGAAGAGCGCGACTTCGACGCC
ATTCGCCCTGTCTTCTTTTCTACTTCTCAGCTTGGTCAGGCTGCGCCGTCTTTTGGCGGAACCACTGGCACACTTCAGGA
TGCCTTTGATCTGGAGGCGCTAAAGGCCCTCGATATCATTGTGACCTGTCAGGGCGGCGATTATACCAACGAAATCTATC
CAAAGCTTCGTGAAAGCGGATGGCAAGGTTACTGGATTGACGCAGCATCATCTCTGCGCATGAAAGATGACGCCATCATC
ATTCTTGACCCCGTCAATCAGGACGTCATTACCGACGGATTAAATAATGGTATCAGGACTTTTGTTGGCGGTAACTGTAC
CGTAAGCCTGATGTTGATGTCGCTGGGTGGTTTATTCGCCAATGATCTTGTTGATTGGGTGTCCGTTGCAACCTACCAGG
CCGCTTCCGGCGGTGGTGCGCGACATATGCGTGAGTTATTAACCCAAATGGGCCATCTGTATGGCCATGTGGCAGATGAA
CTCGCGAACCCGTCTTCTGCTATTCTCGATATCGAACGCAAAGTCACAACCTTAACCCGTAGCGGTGAGCTGCCGGTAGA
TAACTTTGGCGTGCCGCTGGCGGGTAGCCTGATTCCGTGGATCGACAAACAGCTTGATAACGGTCAGAGCCGCGAAGAGT
GGAAAGGGCAGGCGGAAACCAACAAGATCCTCAACACATCTTCCGTAATTCCGGTAGATGGTTTATGTGTGCGTGTCGGG
GCATTGCGCTGCCACAGCCAGGCATTCACTATTAAATTGAAAAAAGATGTGTCTATTCCGACCGTGGAAGAACTGCTGGC
TGCGCACAATCCGTGGGCGAAAGTTGTTCCGAACGATCGGGAAATCACTATGCGTGAGCTAACCCCAGCTGCCGTTACCG
GCACGCTGACCACGCCGGTAGGCCGTCTGCGTAAGCTGAATATGGGACCAGAGTTCCTGTCAGCCTTTACCGTGGGCGAC
CAGCTGCTGTGGGGGGCCGCGGAGCCGCTGCGTCGGATGCTTCGTCAACTGGCGTAATCTTTATTCATTAAATCTGGGGC
GCGATGCCGCCCCTGCTAGTGCGTAATACAGGAGTAAGCGCAGATGTTTCATGATTTACCGGGAGTTAAATAGAGCATTG
GCTATTCTTTAAGGGTGGCGGAATACACGAGTATTCACAGCCTTACCTGAAGTGAGGACGACGCAGAGAGGATGCACAGA
GTGCTGCGCCGTTCAGGTCAAAAAAATGTCACAACCAGAAGTCAAAAATTCAGTTGGATGGGGTGACACAATAAAACAGG
AAGACAAGCATGTCCGATCGTATCGATAGAGACGTGATTAACGCGCTAATTGCAGGCCATTTTGCGGATCCTTTTTCCGT
ACTGGGGATGCATAAAACCACCGCGGGACTGGAAGTCCGTGCCCTTTTACCCGACGCTACCGATGTGTGGGTGATTGAAC
CGAAAACCGGGCGCAAACTCGCAAAACTGGAGTGTCTCGACTCACGGGGATTCTTTAGCGGTGTCATTCCGCGACGTAAG
AATTTTTTCCGCTATCAGTTGGCTGTTGTCTGGCATGGTCAGCAAAACCTGATTGATGATCCTTACCGTTTTGGCCCGCT
AATCCAGGAAATGGATGCCTGGCTATTATCTGAAGGTACTCACCTACGTCCGTATGAAACCTTAGGCGCGCATGCAGATA
CTATGGATGGCGTCACAGGTACGCGTTTTTCTGTCTGGGCTCCAAACGCCCGTCGGGTCTCGGTGGTTGGGCAATTCAAC
TACTGGGACGGTCGCCGTCATCCGATGCGCCTGCGTAAAGAGAGCGGAATCTGGGAACTGTTTATCCCTGGGGCGCATAA
CGGTCAGCTCTATAAATACGAGATGATTGATGCCAATGGCAACTTGCGTCTGAAGTCCGACCCTTATGCCTTCGAAGCGC
AAATGCGCCCGGAAACCGCGTCTCTTATTTGCGGGCTGCCGGAAAAGGTTGTGCAGACTGAAGAGCGCAAAAAAGCGAAT
CAGTTTGATGCGCCAATCTCTATTTATGAAGTTCACCTGGGCTCCTGGCGTCGTCACACCGACAACAATTTCTGGTTGAG
CTACCGCGAGCTGGCCGATCAACTGGTGCCTTATGCTAAATGGATGGGCTTTACCCATCTCGAGCTACTGCCCATTAACG
AGCATCCCTTCGATGGCAGTTGGGGTTATCAGCCAACCGGCCTGTATGCACCGACCCGCCGTTTTGGTACTCGCGACGAC
TTCCGTTATTTCATTGATGCCGCACACGCAGCTGGTCTGAACGTGATTCTCGACTGGGTGCCAGGCCACTTCCCGACCGA
TGACTTTGCGCTTGCCGAATTTGATGGCACGAACTTGTATGAACACAGCGATCCGCGCGAAGGCTATCATCAGGACTGGA
ACACGCTGATCTACAACTATGGTCGCCGTGAAGTCAGTAACTTCCTTGTCGGTAACGCGCTTTACTGGATTGAACGTTTT
GGTATTGATGCGCTGCGCGTCGATGCGGTAGCGTCAATGATTTATCGCGACTACAGCCGTAAAGAGGGGGAGTGGATCCC
GAACGAATTTGGCGGTCGCGAGAATCTTGAAGCGATTGAATTCTTGCGTAATACCAACCGTATTCTTGGTGAGCAGGTTT
CCGGTGCAGTGACAATGGCGGAGGAGTCTACCGATTTCCCTGGCGTTTCTCGTCCGCAGGACATGGGCGGTCTGGGCTTC
TGGTACAAGTGGAACCTAGGCTGGATGCATGACACCCTGGACTACATGAAGCTCGACCCGGTTTATCGTCAGTATCATCA
CGATAAACTGACCTTCGGGATGCTCTACAACTACACTGAAAACTTCGTCCTGCCGTTGTCGCATGATGAAGTGGTCCACG
GTAAAAAATCGATTCTCGACCGGATGCCGGGCGACGCATGGCAGAAATTCGCTAACCTGCGCGCCTACTACGGCTGGATG
TGGGCATTCCCGGGCAAGAAACTACTGTTCATGGGGAACGAATTTGCCCAGGGCCGCGAGTGGAACCATGACGCCAGCCT
CGACTGGCATCTGTTGGAAGGCGGCGATAACTGGCACCACGGTGTCCAGCGTCTGGTGCGCGATCTGAACCACACCTACC
GCCACCATAAAGCAATGCATGAACTGGATTTTGACCCGTACGGCTTTGAATGGCTGGTGGTGGATGACAAAGAACGCTCG
GTGCTGATCTTTGTGCGTCGCGATAAAGAGGGTAACGAAATCATCGTTGCCAGTAACTTTACACCGGTGCCGCGTCATGA
TTATCGCTTCGGTATTAACCAGCCGGGTAAATGGCGTGAAATCCTCAATACCGATTCCATGCACTATCACGGCAGTAATG
CAGGCAATGGCGGCGCAGTACACAGCGATGAGATTGCCAGCCACGGTCGTCAGCATTCACTGAGCCTGACGCTACCACCT
CTGGCCACTATCTGGCTGGTTCGGGAGGCAGAATGACACAACTCGCCATTGGCAAACCCACTCCCCTCGGCGCGCATTAC
GACGGTCAGGGCGTCAACTTCACACTTTTCTCCGCTCATGCCGAGCGGGTAGAGCTGTGTGTCTTTGATGCCAATGGCCA
GGAACATCGCTATGACTTGCCAGGGCACAGTGGCGACATTTGGCACGGTTATCTGCCGGATGCGCGCCCGGGTTTGCGTT
ATGGTTATCGCGTTCATGGCCCCTGGCAACCCGCCGAGGGGCATCGCTTTAACCCGGCGAAGTTGTTGATTGATCCTTGC
GCGCGGCAAATTGACGGGGAGTTTAAAGATAACCCGCTGCTGCACGCCGGTCATAATGAACCTGACTATCGCGACAACGC
CGCCATTGCGCCGAAATGCGTAGTGGTGGTTGATCACTATGACTGGGAGGATGATGCCCCGCCGCGCACGCCGTGGGGCA
GCACCATCATTTATGAAGCCCATGTCAAAGGATTAACGTATCTGCACCCGGAGATCCCGGTCGAGATCCGTGGCACTTAT
AAAGCCCTGGGGCATCCGGTGATGATCAACTATTTGAAACAGTTGGGCATTACAGCGCTGGAACTGCTGCCGGTGGCACA
ATTTGCCAGCGAACCACGTCTGCAACGTATGGGGCTTAGTAACTACTGGGGTTACAACCCGGTGGCGATGTTTGCGCTGC
ATCCGGCGTATGCCTGCTCGCCAGAAACGGCGCTGGATGAGTTTCGCGATGCAATCAAAGCACTGCATAAAGCGGGTATC
GAAGTCATTCTTGATATCGTGCTCAACCATAGTGCGGAACTGGACCTCGACGGCCCGTTATTCTCGCTGCGTGGGATCGA
CAACCGTAGCTATTATTGGATAAGAGAAGACGGCGATTATCACAACTGGACCGGTTGTGGTAACACGCTCAATTTGAGTC
ATCCGGCGGTGGTAGATTATGCCAGCGCCTGCCTGCGTTATTGGGTAGAAACCTGCCACGTCGATGGTTTCCGCTTTGAT
CTGGCGGCAGTCATGGGCCGTACGCCAGAGTTTCGTCAGGATGCGCCGTTGTTTACCGCTATCCAGAACTGCCCGGTGCT
CTCGCAGGTGAAGTTAATTGCTGAACCGTGGGATATCGCTCCTGGTGGTTATCAGGTGGGAAATTTCCCGCCGCTGTTTG
CCGAGTGGAACGATCATTTCCGCGATGCAGCCCGTCGTTTCTGGCTGCATTATGATTTACCTCTGGGAGTGTTTGCCGGG
CGTTTTGCTGCCTCCAGCGATGTTTTTAAACGTAATGGTCGTCTGCCGAGTGCCGCGATTAATCTCGTCACCGCGCATGA
CGGTTTTACGCTTCGCGACTGCGTTTGCTTCAACCATAAACACAATGAAGCAAACGGAGAAGAAAATCGCGACGGGACCA
ACAACAATTACAGTAACAATCATGGTAAAGAAGGGTTAGGCGGTACTCTTGATCTGGTTGAACGGCGGCGCGACAGCATT
CACGCCCTGTTAACAACGTTGTTGCTCTCCCAGGGTACGCCGATGTTACTGGCCGGTGACGAACATGGTCACAGCCAGCA
TGGCAATAACAATGCCTACTGTCAGGATAACCAATTAACCTGGTTGGACTGGTCGCAGGCAAGCAGTGGTTTAACCGCAT
TTACCGCCGCGTTAATCCATCTGCGCAAGCGCATTCCCGCTTTGATGGAGAATCGCTGGTGGGAAGAAGGCGACGGCAAT
GTCCGTTGGCTAAATCGATATGCTCAACCTTTAAGCACGGATGAGTGGCAAAACGGGCCGAAACAGCTGCAAATTCTGCT
CTCGGATCGCTTTTTGATCGCAATTAACGCCACGCTTGAGGTAACAGAGATTGTTTTACCTGCTGGGGAGTGGCACGCCA
TTCCCCCATTCGCTGGAGAGGATAACCCAGTGATTACGGCTGTCTGGCAGGGACCTGCACACGGATTGTGTGTGTTCCAG
AGATGATAAAAAAGGAGTTAGTCATGGTTAGTTTAGAGAAGAACGATCACTTAATGTTGGCGCGCCAGCTGCCATTGAAA
TCTGTTGCCCTGATACTGGCGGGAGGACGTGGTACCCGCCTGAAGGATTTAACCAATAAGCGAGCAAAACCGGCCGTACA
CTTCGGCGGTAAGTTCCGCATTATCGACTTTGCGCTGTCTAACTGCATCAACTCCGGGATCCGTCGTATGGGCGTGATCA
CCCAGTACCAGTCCCACACTCTGGTGCAGCACATCCAGCGCGGCTGGTCATTCTTCAATGAAGAAATGAACGAGTTTGTC
GATCTGCTGCCAGCACAGCAGAGAATGAAAGGGGAAAACTGGTATCGCGGCACCGCAGATGCGGTCACCCAAAACCTCGA
CATTATCCGCCGTTATAAAGCGGAATACGTGGTGATCCTGGCGGGCGACCATATCTACAAGCAAGACTACTCGCATATGC
TTATCGACCACGTCGAAAAAGGCGCACGTTGCACCGTTGCTTGTATGCCAGTACCGATTGAAGAAGCCTCCGCGTTTGGC
GTTATGGCGGTTGATGAGAACGATAAAATTATCGAATTCGTTGAAAAACCAGCTAACCCGCCGTCAATGCCGAACGATCC
GAGCAAATCTCTGGCGAGTATGGGTATCTACGTCTTTGACGCCGACTATCTGTATGAACTGCTGGAAGAAGACGATCGCG
ATGAGAACTCCAGCCACGACTTTGGCAAAGATTTGATTCCCAAGATCACCGAAGCCGGTCTGGCCTATGCGCACCCGTTC
CCGCTCTCTTGCGTACAATCCGACCCGGATGCCGAGCCGTACTGGCGCGATGTGGGTACGCTGGAAGCTTACTGGAAAGC
GAACCTCGATCTGGCCTCTGTGGTGCCGGAACTGGATATGTACGATCGCAATTGGCCAATTCGCACCTACAATGAATCAT
TACCGCCAGCGAAATTCGTGCAGGATCGCTCCGGTAGCCACGGGATGACCCTTAACTCACTGGTATCCGGCGGTTGTGTG
ATCTCCGGTTCGGTGGTGGTGCAGTCCGTTCTGTTCTCGCGCGTTCGCGTGAATTCATTCTGCAACATTGATTCCGCCGT
ATTGTTACCGGAAGTATGGGTAGGTCGCTCGTGCCGTCTGCGTCGCTGCGTCATCGATCGTGCTTGTGTTATTCCGGAAG
GCATGGTGATTGGTGAAAACGCAGAGGAAGATGCACGTCGTTTCTATCGTTCAGAAGAAGGCATCGTGCTGGTAACGCGC
GAAATGCTACGGAAGTTAGGGCATAAACAGGAGCGATAATGCAGGTTTTACATGTATGTTCAGAGATGTTCCCGCTGCTT
AAAACCGGCGGTCTGGCTGATGTTATTGGGGCATTACCCGCAGCACAAATCGCAGACGGCGTTGACGCTCGCGTACTGTT
GCCTGCATTTCCCGATATTCGCCGTGGCGTGACCGATGCGCAGGTAGTATCCCGTCGTGATACCTTCGCCGGACATATCA
CGCTGTTGTTCGGTCATTACAACGGGGTTGGCATATACCTGATTGACGCGCCGCATCTCTATGATCGTCCGGGAAGCCCG
TATCACGATACCAACTTATTTGCCTATACCGACAACGTATTGCGTTTTGCGCTGCTGGGGTGGGTTGGGGCAGAAATGGC
CAGCGGGCTTGACCCATTCTGGCGTCCTGATGTGGTGCATGCGCACGACTGGCATGCAGGCCTTGCGCCTGCGTATCTGG
CGGCGCGCGGGCGGCCGGCGAAGTCGGTGTTTACTGTGCACAACCTGGCCTATCAAGGCATGTTTTATGCACATCACATG
AATGACATTCAATTGCCATGGTCGTTCTTTAATATTCATGGGCTGGAATTCAACGGACAAATCTCTTTCCTGAAGGCCGG
TCTGTACTATGCCGATCACATTACGGCAGTCAGCCCAACCTACGCTCGCGAGATCACCGAACCGCAGTTTGCCTACGGTA
TGGAAGGTCTGTTGCAACAGCGTCACCGTGAAGGGCGTCTTTCCGGCGTACTGAACGGCGTGGACGAGAAAATCTGGAGT
CCAGAGACGGACTTACTGTTGGCCTCGCGTTACACCCGCGATACGTTGGAAGATAAAGCGGAAAATAAGCGCCAGTTACA
AATCGCAATGGGGCTTAAGGTTGACGATAAAGTGCCGCTTTTTGCAGTGGTGAGCCGTCTGACCAGCCAGAAAGGTCTCG
ACCTGGTGCTGGAAGCCTTACCTGGTCTTCTGGAGCAGGGCGGGCAGCTGGCGCTACTCGGCGCGGGCGATCCGGTGCTG
CAGGAAGGTTTCCTTGCGGCGGCAGCGGAATACCCCGGCCAGGTGGGCGTTCAGATTGGCTATCACGAAGCATTTTCGCA
TCGCATTATGGGCGGCGCGGACGTCATTCTGGTGCCCAGCCGTTTTGAACCGTGCGGCTTAACGCAACTTTATGGATTGA
AGTACGGTACGCTGCCGTTAGTTCGGCGCACTGGTGGGCTTGCTGATACGGTTTCTGACTGTTCTCTTGAGAACCTTGCA
GATGGCGTCGCCAGTGGGTTTGTCTTTGAAGATAGTAATGCCTGGTCGCTGTTACGGGCTATTCGACGTGCTTTTGTACT
GTGGTCCCGTCCTTCACTGTGGCGGTTTGTGCAACGTCAGGCTATGGCAATGGATTTTAGCTGGCAGGTCGCGGCGAAGT
CGTACCGTGAGCTTTACTATCGCTTGAAATAGTTTTCAGGAAACGCCTATATGAATGCTCCGTTTACATATTCATCGCCC
ACGCTTAGCGTAGAAGCTCTTAAGCACTCTATCGCTTACAAGCTGATGTTTACGATTGGAAAGGATCCGGTCGTCGCCAA
TAAACATGAATGGCTGAACGCAACGTTATTTGCTGTGCGCGATCGTCTCGTGGAGCGCTGGTTACGTTCAAACCGTGCCC
AGTTGTCGCAAGAAACTCGTCAGGTTTACTACCTGTCGATGGAGTTTTTGATTGGCCGTACGCTCTCCAACGCCATGTTG
TCGCTAGGAATTTACGAAGATGTACAGGGCGCACTGGAAGCAATGGGATTAAATCTCGAAGAGCTGATTGATGAAGAAAA
TGACCCGGGCCTCGGTAACGGTGGCCTGGGCCGTCTGGCGGCTTGCTTCCTCGATTCTCTGGCGACGTTAGGGCTGCCGG
GGCGCGGTTACGGCATCCGCTATGACTACGGTATGTTCAAGCAAAACATCGTTAACGGTAGCCAGAAAGAGTCGCCTGAC
TACTGGCTGGAATACGGTAACCCGTGGGAATTCAAACGCCACAACACGCGCTATAAAGTCCGTTTTGGCGGTCGCATTCA
GCAGGAAGGTAAAAAAACGCGCTGGATTGAAACCGAAGAGATTCTGGGAGTAGCTTACGATCAGATAATCCCAGGTTACG
ACACTGACGCGACCAACACGCTGCGTTTGTGGAGTGCCCAAGCCAGTAGCGAAATTAACCTCGGTAAATTCAACCAGGGC
GACTACTTCGCGGCAGTGGAAGATAAAAACCACTCCGAGAACGTATCTCGCGTACTGTATCCGGATGACTCCACCTACTC
CGGACGTGAGCTGCGACTGCGTCAGGAATACTTCCTGGTTTCCTCGACCATTCAGGACATTTTAAGCCGCCATTATCAGT
TGCATAAAACCTACGATAACCTGGCGGATAAAATTGCGATTCACCTCAACGATACCCATCCGGTGCTGTCGATTCCTGAG
ATGATGCGTCTGCTGATCGATGAGCACCAATTTAGCTGGGACGACGCGTTCGAAGTGTGTTGTCAGGTCTTCTCCTACAC
CAACCACACGCTAATGAGCGAGGCGCTGGAAACCTGGCCAGTCGATATGCTGGGTAAAATTCTGCCGCGTCACCTGCAGA
TCATCTTTGAAATCAACGACTATTTCCTGAAAACCTTGCAGGAACAGTATCCGAACGATACCGATCTGCTGGGACGGGCG
TCGATCATTGATGAATCCAACGGTCGTCGTGTGCGTATGGCCTGGCTGGCGGTTGTGGTGAGCCACAAAGTTAACGGTGT
ATCGGAGCTGCACTCTAACCTGATGGTGCAATCGCTATTTGCTGACTTTGCGAAAATCTTCCCGGGTCGTTTCACCAACG
TCACCAACGGTGTGACGCCGCGTCGCTGGCTGGCGGTAGCGAACCCATCGCTTTCAGCCGTGTTGGACGAACACCTGGGC
CGCAACTGGCGCACCGACCTTAGCCTGCTTAATGATCTGCAACAACACTGTGATTTCCCAATGGTTAATCACGCGGTGCA
TCAGGCGAAGCTGGAGAACAAAAAGCGTCTGGCGGAGTATATCGCCCAGCAGCTGAATGTGGTGGTAAATCCGAAAGCGC
TGTTCGATGTGCAAATCAAACGTATTCACGAATACAAACGTCAATTGATGAATGTGTTGCACGTGATCACCCGCTATAAC
CGCATCAAGGCCGACCCAGATGCGAAGTGGGTACCGCGCGTGAATATTTTTGGCGGTAAGGCGGCTTCGGCCTATTACAT
GGCGAAGCACATTATTCATTTGATCAATGACGTAGCGAAAGTGATCAACAACGATCCGCAGATTGGCGACAAGCTGAAAG
TCGTGTTCATCCCGAACTACAGTGTTAGCCTGGCGCAGTTGATCATTCCGGCGGCCGATCTATCTGAACAGATTTCGCTG
GCGGGGACGGAGGCTTCCGGCACCAGTAACATGAAGTTTGCGCTTAACGGCGCGCTGACTATCGGTACGCTGGACGGTGC
GAATGTCGAGATGCTGGATCATGTCGGTGCTGACAATATCTTTATCTTTGGTAACACAGCGGAAGAAGTGGAAGAACTGC
GTCGTCAGGGCTACAAACCGCGTGAATACTACGAGAAAGATGAGGAGCTGCATCAGGTGCTGACGCAAATCGGCAGCGGT
GTATTCAGTCCGGAAGATCCGGGTCGCTATCGCGATCTGGTTGATTCGCTGATCAACTTCGGCGATCACTACCAGGTACT
GGCGGATTATCGCAGCTATGTCGATTGTCAGGATAAAGTCGACGAACTCTACGAGCGTCAGGAAGAGTGGACCGCAAAAG
CGATGCTGAACATTGCCAATATGGGCTACTTCTCTTCTGACCGTACGATCAAAGAGTACGCCGATCATATCTGGCATATT
GATCCGGTGAGATTGTAAGTTCGCTAAAAAACAGAACGGGGCCAAAAGGTCCCGTTTTTTTTTCGCCTTTATTTAGGAAA
AGTGTCCAGAGGGGGCGAGGGTTATCGGGGAGTATAATTTCGCCATTCAGCAAGAATGGAAAGAATAATGCAAAACGGAA
AATGGATTTTGACCTCGCTGGTAATGACTTTTTTTGGCATCCCCATACTGGCGCAATTTTTGGCAGCGGTTGTTGCCATG
CTGGGGGCCGGGCTTGCCGCTATTCTTGAGGTTTGCAATTTACTCTTTACGCCAACAATTTATCTTCTACTCAACGTCTT
TATGCTGACGCTGGGGGCGATAATCATATTTTTCTCTGGTCGCGTGTGGGCTGGTGATAGCGCACCAGAAAAAAGAGAAA
TAGCCGCCTGGCGACAATGCTTTTTTCTCTTACCCGCGCTATTAACCTTGGTTGGCTGGATAATCGCGCTACATCTGGCA
GATTATCAATTTCGCCAGATGGGAGCCGGTTGGTTGGCAAACCTTATGCTTCCCTGGTTGGGCGTTTTTACAGTCTCATT
CGTCGGTGGTGAGTACTGGTGGATAGTCATTATTCCCGTTGGCGCGCATATCAGTTTTTCACTGGGATACGGCTGGCTGA
CCAGACATCCTTTAACCGGCACCTCCGGTCTACGTTGCCGTAATTTACTTCTGTTCATTCTTCTCTTACTGGGTATTGTC
GCTGGTTATCAGGCTTATTTATATAAACAGCTTAATCCCGGCGTCGGTGTGCGTGAAAATATTGATACCTGGGCCTGGCG
ACCCGATAAACTTTATAATCAACTGACGCCACTGCGTGGTAAACCACAAATTCAATTTACGCAAAACTGGCCGCGAAGCG
ATGGCGCTACGGCAGCGTATCCGCTTTATGCCTCTGCATTTTATGCACTAAGCGTTATACCGGAAGATTTTCATTCCTGG
GAATATCTGACGAACTCTCGAACACCAGAAGCGTATAACAGGATCGTTAACGGTGATGCCGATATTATTTTCGTGGCGCA
ACCTTCCGATGGGCAAAAAAAACGCGCTGAGAAATCGGGCGTCACTTTGCTGTACACGCCATTTGCCCGTGAAGCGTTTG
TTTTCATCGTCAATGCGGATAATCGGTTAATTCCCTGACTGAACAACAAGTGTGTGACATTTTTAGTGGCGAAATTACCA
ACTGGCGCACGGTTGGCGGTAAGGATCAGGAGATCCAGACCTGGCAACGCCCGGAAGACTCTGGCAGCCAGACAGTGATG
CAATCACAGGTCATGAAAAATGTCCGCATGATCTCGCCGCAGGAAACCGAAGTGGCAAGCATGATGGAGGGAATGATTAA
AGTCGTTGCCGAATACCGTAATACAAACAACGCAATAGGCTACACCTTCCGCTATTACGCAACACAAATGAATGCCGATA
AAAATATAAAACTGCTAGCGATTAACGGTATTGCACCGACTGTGGAAAATATTCGCAACGACAAATATCCCTATATAGTC
GATGCCTTAATGGTAACGCGGGAAAATACGACGTCAGAGACACAAAAATTGGTGGAGTGGTTTTTAACACCGCAGGGGCA
GAGTTTGGTGGAAGATGTGGGCTATGTGCCGATGGATAAAACGTTGCATTAAGCAGGATTACAATATGGATATCATTAAT
ATTTTCCTGAACGCGGCGAATGCCCTTTTTAGCTATCAGCCGTTTATGCACGATCAGCGGGCGAGGGAGTAATTATGCAC
CCCACTCCTGCCATGCAGGCATTAATTGAGCAGATATATCATATTTTTCGTCGTTATCCGGCGCCGCAGCAATTTGTGGT
TTGTTGTGAATATTGTCTGAGTCAACAGGAACAAAAAGCATTACGGAATACATCGTTGCGAGCGATTCCTTATTCCTTAA
TCAATGCCTGGAATAGTAGTCCAGGACCTGATCCGCAAAACAGCGATGAGGTTCGTTATTTTCTGCCTCGTTTACTGGAG
TTTGTTGCGCAGGGGCAATTTGACAATATTCACGAAGTATTTTTTCTACGGCGTATCAACCTTGCCAGTAAAGAAAACTG
GCGTGAGGATGAACGGGAAATATTGCAGCAATTTGCTTGCCAGTATATGACTGATTGGGTATCCGGGGATGAGGCTGTCG
AATTACAGTACAAGCTGGAAATGTTTTTCCGTGCCGATATCGCTCTTTCGCCATTGCTTGATGCCACTATTTCAGTTCCC
GGATTTTGGTCGGCAGCGTCTCTTGCCTGTTTATTGAATACGTATCGTGACGGTTATATCAGAGATAACCAGGACGATAT
CGATAAAGCCATTACCGCCCAAATCAATGCCTGGGCCTTCAACAATCAATCCATCCTGAAAGAACGCGCGCGGCAGGCGA
TTGAGAACCCGCTTAAGCAGCCCGAACAGGGCACACAGTATCAGGCCTGGGAAGACGACTGGATGATTGATGAGTGTTTA
TGCGCGATGTATGACGCATCATCCGAATCACCAGGAAAATAAAAATGATTAAATTCCGGCTTTATATTCCCCCTGTAATT
CTCGGTTTTGTTATCGTACCATTATTGGTATGGCCGACGGTTATTGCCTTAGCCGTACTTATATTCACGTTAACTTTTCT
GGCGGAAATAATATTCTCCTTTCCGCTCCTGGTTGTGCGTATTTCTCTTCAGGAATTACAACTTGAGTTATTGGTTGAAT
ATGCACTTTTTTTCAGTGTAATGTGTGGCATCGGTTGGCAATTCTCGCGCAGAACGCCTCCTGAATTAAAAAACAGGTTA
CATTGCTGGCTGGTCTTTTCTCCGGTCTATTTTTGGTTAATTCTCTCGAACTTCATTCTTTATATTTCTCCAGAGAAATC
AGCGTTGCTGGAAAATATCCGAAATTTCTTTCTGACGTTTGTCTGGCTTCCCCTGAATTTTTCCCCTTTTTGGCCGCAGC
CGTGGACTGATTTTGTTGGCCCGATTAGTGCACAGCTTGGTTTTGCGTTGGGATATTATTGTCAGTGGCGTAGCAAAAAT
AGAAGCCATAGGAAGAAGTGGGGCGATTGGGTAACGTGCTTAAGTTTGGCGATTTTATCTCTGGGGCCGTTATTCAATTA
TTCACAATGAATAGTCTAAGGAATTCAAATAGCCCGGTTGCACTTCACAACCGGGCATCATCCTTACGACGCCTGCGACA
ACTTCTGCTGCGTATATTCCACCAGCCACTGACTCACACGAGATTGTTGTTCCGCATTCAGCCACATGCCTTGTTTTGTG
CGACGCCACAGGGCATCGTCGGCGCGGCGGACCCATTCGTGATCCACCAGATATTTCAGCTCCGCTTCGTAGAACTCATG
ACCGAAATCTTCACCGAGGTCGCTTATCGCCCCTGCATTGCCGAGCAGCAGTTCGCTGTTGCTGCCGTAAGTGCGCGCGT
AGTGACGTGCCAGTGATTCGGTCAGGAATGGGTAACGGCGGCGCAGGCGGGCGGCGTAATCGTCACGGTCGCCTTCAATG
GCACCACCCGGCAGCACGCTCTCTTTCGTCCACGCCGGACCAATGCCCTGATAATACGGCGTCAGTTTTTCCAGCGCGTG
CTCCGCCAGTTTGCGGTAGGTGGTCAGCTTACCGCCGAATACCGACAGCAGCGGGGCTTTGCCGTTTTCATCATGGATAT
CAAGGGTGTAATCACGGGTAATGGCCTGCGGCGAGTCGGACTCATCATCACATAGCGGACGCACGCCGGAGTAGGTCCAG
ACGATATCGTCCCGGTTTAACTGCTTTTTAAAGTGCGTGTTATACACTTTCAACAGGTAATTGATTTCACTCTCTTCAAT
CTTCACTGCTTTTGGATCGCCTTTGTATTCCACATCGGTGGTGCCGATGATGGAAAACTCGTCCATCCACGGGATCACGA
AGACAATACGTTTATCTTCGTTTTGCAGAATGTAGGCTTGCTTCTGGGTATGCACACGCGGCACCACAATATGGCTGCCT
TTGATCAGGCGAATGCCATAAGGCGAAGGCAGATGCATCCCGTCGTCGAAAAATTGTTTCACCCACGGGCCGGTAGCATT
AACCAGGCCGCGCGCCTGCCATGTATATTTTTTGCCGGTATCGATATCTTCCGCTTCCACAATCCACAGGCCGTTTTCGC
GGCGAGCAGACGTGGCACGAGTACGAGTAAGCACTTCACCGCCTTTACGCACCACCATCTGGGCGTTGGCGAGTACCAGA
CGGGCGTCGTCTACCCAACAGTCAGAATATTCGAATCCGCGCTTAATTTCCGGTTTTAACACTGAGTTTGCGCCAAAACG
CAAACCGGTTGATCCCGGCAGGCTGGTGCGCTTACCCAGATGATCGTACATAAACAGACCAATGCGAATCATCCACGCCG
GGCGTAGATGCGGACGATGCGGCAGGCGAAAACGCATCGGGAAGGCGATATGCGGGGCCATTTTCAGTAGCACTTCACGT
TCAGCCAGCGCCTCGCTGACCAGTCGGAATTCATAGTGCTCAAGGTAGCGCAGGCCACCGTGAATGAGTTTTGAACTGGC
GGAAGAGGTCGCGCAAGCGAGATCCTGCGCCTCCAGCATCAGCACGGATAAACCGCGTCCAGCGGCGTCTGCCGCGATAC
CAGCACCATTGATGCCGCCACCTATCACAATCAGATCTTTGGTTTCCATGCTGCCCTCATTCACTTTCGTTAAAGTTCAT
AAATGTTCGTTATCGAACATATTAGCAAAGAATCGCGCTTTGGGTAACATTGAAAAAACATTTTAGAGTGATATGTATAA
CATTATGGCGTTTATCTGCCGCTTCGACGTAAACTGTGCGGTAAATTTGCCCACTTGTTTGTAAAGAAAGAGAGACGCAT
GGATCAGTTCGAATGTATTAACGTTGCCGACGCGCACCAGAAGTTGCAGGAAAAAGAGGCGGTGCTGGTCGATATTCGCG
ATCCACAGAGTTTCGCAATGGGGCATGCGGCGCAGGCTTTCCATTTAACTAACGACACACTGGGCGCGTTTATGCGTGAT
AACGACTTCGATACGCCAGTCATGGTGATGTGTTACCACGGTAATAGCAGCAAAGGCGCGGCGCAGTATCTGCTGCAACA
GGGCTACGATGTGGTCTACAGCATTGATGGCGGCTTTGAAGCCTGGCAGCGCCAGTTTCCCGCAGAGGTGGCGTACGGCG
CGTAACGCTTTATACTGTCCCCTTTTGTGTGGAATAAGCGACAGCAACGATGTTGATGATTACCTCTTTTGCTAACCCCC
GAGTGGCGCAGGCGTTTGTTGATTACATGGCGACGCAGGGTGTTATCCTCACGATTCAACAACATAACCAAAGCGATGTC
TGGCTGGCGGATGAGTCCCAGGCCGAGCGCGTGCGGGCGGAGCTGGCGCGTTTTCTCGAAAACCCGGCAGATCCGCGTTA
TCTGGCGGCCAGCTGGCAGGCGGGCCATACCGGCAGTGGCCTGCATTATCGCCGTTATCCTTTCTTTGCCGCCTTGCGTG
AACGCGCAGGTCCGGTAACCTGGGTGATGATGATCGCCTGCGTGGTGGTGTTTATCGCCATGCAAATTCTCGGCGATCAA
GAAGTGATGTTATGGCTGGCCTGGCCATTCGATCCGACGCTGAAATTTGAGTTCTGGCGTTACTTCACCCACGCGTTAAT
GCACTTCTCGCTGATGCATATCCTCTTTAACCTGCTCTGGTGGTGGTATCTCGGCGGTGCGGTGGAAAAACGCCTCGGTA
GCGGTAAGCTAATTGTCATTACGCTTATCAGCGCCCTGTTAAGCGGCTATGTGCAGCAAAAATTCAGCGGGCCGTGGTTT
GGCGGGCTTTCTGGCGTGGTGTATGCGCTGATGGGCTACGTCTGGCTACGTGGCGAACGCGATCCGCAAAGTGGCATTTA
CCTGCAACGTGGGTTAATTATCTTTGCGCTGATCTGGATTGTCGCCGGATGGTTTGATTTGTTTGGGATGTCAATGGCGA
ACGGAGCACACATCGCCGGGTTAGCCGTGGGTTTAGCGATGGCTTTTGTTGATTCGCTCAATGCGCGAAAACGAAAATAA
TTCCAGGGATTTAGAAATGAAACAAACACAACGTCACAACGGTATTATCGAACTGGTTAAACAGCAGGGTTATGTCAGTA
CCGAGGAGCTGGTGGAGCACTTCTCCGTCAGCCCGCAGACTATTCGCCGCGACCTCAACGAACTGGCAGAGCAAAACCTG
ATCCTGCGCCATCATGGCGGTGCGGCGCTGCCTTCCAGTTCGGTTAACACGCCGTGGCACGATCGCAAGGCCACCCAGAC
CGAAGAAAAAGAGCGCATCGCCCGCAAAGTGGCGGAGCAAATTCCCAATGGCTCGACGCTGTTTATCGATATCGGCACCA
CGCCGGAAGCGGTGGCGCACGCGCTGCTTAATCACAGCAATTTACGCATTGTGACCAACAATCTCAACGTCGCTAACACG
CTGATGGTAAAAGAGGATTTCCGTATCATTCTTGCCGGTGGTGAATTGCGTAGCCGTGATGGCGGGATCATTGGCGAAGC
AACGCTCGATTTTATCTCCCAGTTCCGCCTCGATTTCGGCATTCTGGGGATAAGCGGCATCGATAGCGACGGCTCGTTGC
TGGAGTTCGATTACCACGAAGTTCGCACCAAACGCGCCATCATTGAGAACTCGCGCCACGTTATGCTGGTTGTCGACCAC
TCAAAATTTGGCCGTAACGCAATGGTCAATATGGGTAGCATCAGCATGGTCGATGCTGTCTACACCGACACGATGCCGCC
TGCGAGCGTGATGCAGGTGCTGAAGGACCATCATATTCAACTGGAGCTGTGCTGATCCTGCATTGCTTCCCATGTCAGAC
CAAAACGCGCCAGGTATTTGCGTAGCCGATCCGCGTCATTGACGCTGGCTTTACCCTGGCGCGAAACATCAAAAAGCTGT
CGTCCGGCAGCAGAAAGCGACTTTGCCTGACGACAAACGGCAATAACGTTTTCCAGTTGCATACGGTCGAAGAGGTCGAT
GTTTTCTGCCTCTGTACCCAGCAACGCCGTAAGCGCGGAGGGGCGACTCTCCTGCCAGTTATAGCGCAGACGGTTGATCT
CATCTTCCACCGTATCCAGTGTGATGCGTCCGCTAGTGGCAAAGGTGGCCATCCGCGTGACGCTGGCAGAAAGTTCGCGA
AAGTTGCCGCGCCATGTTGCCTGGGGAGAGGTCGCAAAGGCCAGCCAGGCACGCCGCGCTTCGGTGTTAAAACGCACACT
GTCGCCAGTGAGTGAGGCGTGGCGCTCCACTTCATAATCCAGGTTCGGTTCAATATCTTCCTGGCGCTGGTGTAATCCTG
GCAGGGTGAAGGTCCAGAGATTGATCCGCGCGTACAGATCTTCGCGGAATTTGCCTTCGGCAACCAGCTGACGCAAATCG
CGCACCGTTCCGGCGATCAGCTGAAAGTCGCTACTCACCTGGCGATCGCTGCCAAACGGATAAAAGGTTTTCTCTTCAAT
GGCTTTCAGCAGCATTGCCTGTTCGTCTGCGCCCAGTTCGCCAATCTCATCAAGAAATAACATCCCGCCGTTGGCGCTGC
GTAATAATCCTTCCCGCGACTCCCGCGCCCCGGTAAACGCGCCTTTCACATGACCAAACAGCGCTGACATGGCGGTATCG
CCGCGCAGAGTGGCACAGTTCACCTCCACAAACGCGCCGCTAAACTGATGCCGCGCCTGTTTTAACTCGAAGATGCGTCG
TGCCAGAAACGACTTTCCCGCACCGGTTGGGCCGTTGAGCAGGATCGGTGCGCGGGATTTGATCGCCACTTTTTCGATCT
GCTCAATCATGCGGTTGAAGTGGGCGTTACGCGTGGCAATGCCGGACTTAAGAAAATCGAGCGTTTGCTGGCGTTCCTCG
GCAAAGCGGCTGGCGATGGCGTTATAACGGCTTAAATCGAGATCGATAATCGTCACTTCACCTGCACCGCGCGGCTGTTC
TTTTTTACGCGGTGGCGAAGATTGTATTAACCTGGCGGGCAGGTAACGTGCTTCCGCCAGCAGAAACCAGCAAATCTGCG
CGACGTGGGTACCGGTGGTGATGTGAATTAAATAGTCTTCTTTTTCTGGCTGAAACGCGTAACCACGGGCGAAATCATGC
AGGCAGGCGTAAACCTCCTCGAAATCCCATGGGTTATGCAGTTCAATCTCAACGCCCACCACTTTTGTTTCTGGCGAAAC
ATTGGCGATATCGCGTTTAAGCGTTTCAAACAGCGAGCGTGAGCGGGCGTCGTGCAACAATTCCAGTCGATTGATGACTA
ACGATTCTTGCTGGCATAGACAGAGTGACGGACGCCATTTCGACCATCGCTGACTGCCGCGCCCGGCATAATCCAGTACG
GTGCCGACAAAGCCAAAAGCCACTGTTTTACGCATCTTAGATATCCTTATAAAAGACGATATTTCATTATCGGAAAATTG
GCTTTGTGGGAAATCTCCGTTTACGGACGTAAAGATTTTATCTATTTAAAAACAATGAATTAAAAAATTAATCTACTCAT
TTAATTTTCTGGCACGACGGTTGCAATTATCTGGACAGCAAACAACGAAAAGAGAAAAATAAAATGAATTACGAATTACT
GACCACTGAAAATGTCCCGGTAAAAATGTGGACCAAAGGCGTACCGGTAGAAGACGATGCGCGTCAGCAACTGATAAATA
CGGCGAAGATGCCGTTTATTTTCAAACATATTGCGGTAATGCCTGATGTACATCTGGGTAAAGGTTCCACCATTGGTAGC
GTGATCCCAACCAAAGGAGCGATTATTCCGGCGGCGGTGGGGGTAGATATCGGTTGTGGAATGAACGCGCTGCGTACCGC
GTTAACGGCGGCTGACCTGCCTGAAAACCTGGCGGAGCTGCGTCAGGCGATTGAAGCTGCCGTGCCGCATGGGCGTACCA
CAGGCCGTTGTAAACGTGATAAAGGCGCATGGGAAAAACCGCCTGTTAACGTCGATGCGAAATGGGCTGAGCTTGAAGCC
GGTTATCAGTGGTTAACGCAAAAATATCCGCGTTTCCTTAATACCAATAACTATAAACACCTGGGAACGCTGGGAACGGG
TAACCACTTTATTGAAATTTGCCTTGATGAGTCGGATCAGGTGTGGATTATGCTGCACTCCGGTTCACGCGGAATTGGTA
ATGCCATCGGGACTTACTTTATCGATCTGGCGCAAAAAGAGATGCAGGAAACACTTGAAACGTTGCCATCGCGTGACCTG
GCGTACTTTATGGAAGGTACGGAATATTTTGACGATTACCTGAAAGCGGTGGCCTGGGCGCAGCTTTTTGCCAGCCTTAA
CCGCGATGCGATGATGGAAAACGTGGTAACGGCGTTGCAGAGCGTTACGCAGAAAACGGTAAGACAGCCACAAACGCTGG
CGATGGAAGAGATCAACTGTCACCACAACTATGTGCAAAAAGAACAGCACTTTAGCGAAGAGATCTATGTGACGCGTAAA
GGCGCGGTGTCTGCGCGTGCTGGTCAATATGGAATTATTCCCGGTTCGATGGGGGCGAAAAGCTTTATTGTCCGTGGGCT
GGGAAATGAAGAGTCGTTCTGTTCGTGCAGCCACGGTGCCGGGCGGGTAATGAGCCGTACTAAAGCGAAAAAACTGTTCA
GCGTGGAAGATCAAATTCGTGCCACCGCGCATGTGGAATGCCGTAAAGATGCCGAAGTGATCGACGAAATCCCGATGGCG
TATAAAGATATTGATGCGGTGATGGCGGCACAAAGCGATCTGGTGGAAGTTATCTATACCCTGCGTCAGGTGGTGTGCGT
AAAAGGATAAATGATGAAAAGGATGATTGCGCTGGATGGCGCACAGGGCGAAGGCGGCGGGCAGATCCTGCGCTCGGCGC
TGAGCCTGTCGATGATAACTGGCCAGCCATTTACCATCACTGGCATTCGTGCCGGGCGGGCGAAACCGGGGCTGTTGCGC
CAGCATCTGACCGCGGTTAAGGCGGCGACGGAAATTTGCCGAGCAACGGTGGAAGGCGCGGAGCTGGGGTCGCAGCGTCT
GGTCTTCCGGCCCGGTACCGTGCGTGGCGGCGATTACCGCTTTGCTATCGGTAGTGCCGGAAGCAGCACGCTGGTGCTGC
AAACGGTGCTACCCGCGCTGTGGTTTGCTGACGGGCCTTCGCGTGTTGAAGTGAGCGGCGGCACCGATAACCCGTCGGCA
CCGCCTGCGGATTTTATCCGCCGGGTGCTGGAGCCGCTGCTGGCGAAAATGGGCATTCATCAGCAAACCACATTATTACG
CCACGGTTTTTATCCTGCCGGAGGCGGGGTGGTGGCGACGGAAGTCTCGCCCGTGGCATCGTTTAACACTTTGCAACTTG
GCGAGCGCGGGAACATTGTGCAGATGCGTGGAGAGGTGCTGTTAGCTGGCGTGCCGAGGCATGTCGCTGAGCGTGAAATC
GCTACGCTGGTGGGTAGTTTTTCCCTGCATGAGCAGAATATTCATAACCTGCCGCGTGACCAGGGATCGGGTAATACCGT
CTCGCTTGAAGTCGAAAGTGAAAATATCACCGAACGCTTTTTTATCGTCGGTGAAAAGCGCGTCAGCGCCGAGGTGGTCG
CCGCGCAGTTGGTGAAAGAGGTGAAACGCTACCTGGCAAGCCCGGCGGCGGTGGGGGAATATCTCGCCGACCAGCTGGTA
CTGCCGATGGCGCTGGCGGGCGCGGGAGAATTTACGGTCGCCCATCCTTCATGCCATCTGCTGACCAATATCGCCGTGGT
GGAACGTTTCTTGTCGGTGCGGTTTAGTCTGGTGGAGGCGGATGGCGTAACGCGGGTGAGCATTGAATGATATAAAGATG
TAAGCCGGATCCAATGCATTATCCGGCTAAACTCACACCCCATATCCCATCATCTTCAGCAGTTTCTGCGCGTGTTGTAC
CGCGGCCTGACGGTGGGCGACGCCGAGTTTTTGGTACAGATTGCGGATATGCGTTTTGATGGTGGTTGCCGCCACTTCCA
GCTCGCCTGCAATTTGCTCATTGCTGTAACCGGAGTAAATCAGCCCCAGGACCTGCCATTCACGTTGGGTCAACGGGCTG
GTGCGGATCAGTTCTGGCACTTCCGGATGATTTAGCAGACGTTCAACGAAATTCTCATCGAAATGGGCGAATTTATGCCG
ATGATGTTGATTGATTTCTCGCAGAATACGCTGTGCGCGATGCTGTTCCAGTTCCGGCAGCGTATTGAGTTGAATCAGCT
GGCGCAGTTGTTGCGCCATCGCTTCGCCTTCGATGACAAAATGACTGATAAATCCGGTGCGATTCGCCAGTTTTAATGCG
TCCAGCAACACACGCTGGGCGTCACTTTTACGTCCGGCCTGCCAGTACAGTTGATTAAGCAGCAACAGGTTACGGTTGAG
ATCGCTCATCAACCGCAGACTGCGGGCGTTTTCATTGAGTTCTTCGAGAACAATTTCTGCCGGTTCAAACTCGCCCAGCA
AGATTTGTGCACGGGCAATGTTGCGCCATTGACCTTGCAGGAAGTGGTTGTTCGCAAACTCCGGTTTGGCCGTATGACGC
AACCAGTTGGCAGCGGCGGCTTTATCGCCGGTCATTTGCCAGTAAATCACCCGGACTTTGTTGGCGTTAGAGATCCAGTC
GCTGTGATATTTGCCATTCCCCAGCAGGTTTTCCAGACGGTTAAGCTGGCTACGGGCGTTATCTAAATCACCACGGGCCA
GCGAGCATTGAATCAACATTGCCAGGCACTGAAGCTGTTGCTGAGGCTGATAAGACGACAAGACTTCAATCCCGCTACGC
GCCGACGCTTCGGCTTCATCCAGCCGTGCCCAGGCCCATAACAGCTGTGCACGAATGCGCACCAGAAACTCATGCATTGG
CAGCTGTTCCAGATGCTGCTCGTTGATCAGCTGGAACGCTTTTTCCTGCGTTTCCCACGCGGTTTGCAGGAATCCCTGAG
CAAACAGAATTTCACTTTGCTGGATTAAACTCCATAAGGCGTAGTGCCAGACATCGTGCTGGCGCGCCATCTGTTCGGTT
TGCTGCATTAGCGCCAGTGAGCGGGTCAATTCGCCTTTGCAGTGCAACACTTCACCCAGCACCGAGGTTGCCACAATGCG
GCTATAGAACCAGCCCGGCGGCAGCTCTTCCAGTGCCAGTTTTGCCAGCCGTTCCGCTTCATCCGGATTACCATCGTTAA
TCGCCACCTGGGCGCGCAGAGCGTTAAATTCTGCGTGCATGGTGCCTTCTCTGATGTCCTTGATTTCATGTTCAGCGCGG
GCCAGCAGGGTGTTAACTTCGCCGTAGCGATGCTGGCTTTGCATCAGCCACGCCTGCAATAACACCAACTGCGGATTTTC
CAGCAAACTGTCCCACGGCAGGGCCTTAAGCGACTCTTCCAGCAGTGACAGTTCGCTATGGTTGAACAAACTCCAGGCGT
GATTAAGCAGAATATCGCGCAGCATCAGCGCATCGCCTGCCGCCAGCGCATGATGAATCGCTTCGCTGGGAAATCCCTGG
GCCATCCAGCTTTCTGCGGCGGCACGGTGGATTTCCGGCAGCTCCGCCGCCAGTTCCCACTGGCAGCGCTGGCGCAGGAA
GTTACCAAACAGTGGGTGATAGCAAAACCACTCGCCGGTATCATCCATCCGCTGTAAAAACAGCCCCTGACGCTCAATCT
CTTCGAGGCGCATTTGCCCGTTTTCTTCGCCGGTCACACGGTTGATGAGTGCATCGTTCATTGAGCGCAAAATGGCGCTT
TTCAACAGAAAATGGCGCGTTGCGAGATCGACGTTATCCAAAACCTCATCGACCAGATAATCCGAAAGATGGCTGGCATT
GATTCCCGCCAGGCGGCGTGCCGACTTATGGGCTGAGTGGGTATTCTGCCGGGCGGAGAGGGCGATTAGCTGCAGTGCCG
TCGCCCAACCGGAAACGTCATCACAAATCCGACTGCTTTCTGCGGCTTCAATCGGCGATGACAGACGGCAATCAAAAAAC
TGCTTCGCTTCCTGATGGGTAAATGCCAGTTGCTGACTGCCAATTTCCAGCAGTTGGTCACGAACACGCAGATTGGCAAT
GCCCAGTTGCGGAAGGTTGCGTGACAACACCACCAGGGTGAGATTTTCTGGTTGATGGCGAATAAAGAAGCGCATTGACT
CGTGGATCACTGGATTAGTGATCAGATGATAGTCATCGATGACCAGATAAAGTGGGCTATGCCATTCCGCCAGCTCAATG
AAAAGCTGGGCGAAGAGTGACGTCAGGCTGGCATATTGCCGTTTTTGCGCCATTGTCTCACATATCGCGCAGTGACCGTT
GGTTGCCTGTTGCATGGCGGCAATGAGATAGCTGGCGAAACGCTCTTGCTGGTTATCACCTTCATCCAGCGAGTACCAGC
CGATATCGTTTTTGCCTGCCGCCCACTGGGAAATGAGCGTGGTCTTTCCGTAGCCCGCAGGACTTGTGATCAGCGCCAGC
CGGAAGTTGTTCGCGCCGGAAAGTTTAGCCAGCAGGCGCTCACGAACCACGGTATGGTCGAGTCGAACCGGACGACTTAA
TTTTGACGGAATCAGCATAGTTAATCACTTCACTGTGGAAAATGAGGAAATATTATTTTTTTGCGCTTCGTAATTAATGG
TTATAAGGTCGGCCAGAAACCTTTCTAATGCAAGCGATGACGTTTTTTTATGTGTCTGAATTTGCACTGTGTCACAATTC
CAAATGTTTATTAACAACTCACCTAAAACGACGCTGATCCAGCGTGAATACTGGGTTGTACGGTATTTTCCTTATGTTCA
TCAGTTTCATTTAAGCAAGGGTTTCTTCTTCATTTCTGATGAAAGTGCCATCTAAAAAGATGATCTTAATAAATCTATTA
AGAATGAGATGGAGCACACTTGATATTTTACTTATGAAACTGTTTCACCCCTTTACTTAATTTATAGAGTTACCTTCCGC
TTTTTGAAAATACGCAACGGCCATTTTTTGCACTTAGATACAGATTTTCTGCGCTGTATAGCATTGATTTGCTGCTAATC
CTGTGGTTTGCACTAGCTTTAAGTGGTCGAGATCACATTTCCTTGCTCATCCCCGCAACTCCTCCCTGCCTAATCCCCCG
CAGGATGAGGAAGGTCAACATCGAGCCTGGCAAACTAGCGATAACGTTGTGTTGAAAATCTAAGAAAAGTGGAACTCCTA
TGTCACAACCTATTTTTAACGATAAGCAATTTCAGGAAGCGCTTTCACGTCAGTGGCAGCGTTATGGCTTAAATTCTGCG
GCTGAAATGACTCCTCGCCAGTGGTGGCTGGCAGTGAGTGAAGCACTGGCCGAAATGCTGCGTGCTCAGCCATTCGCCAA
ACCGGTGGCGAATCAGCGACATGTTAACTACATCTCAATGGAGTTTTTGATTGGTCGTCTGACGGGCAACAACCTGTTGA
ATCTCGGCTGGTATCAGGATGTACAGGATTCGTTGAAGGCTTATGACATCAATCTGACTGACCTGCTGGAAGAAGAGATC
GACCCGGCGCTGGGTAACGGTGGTCTGGGCCGTCTGGCAGCGTGCTTCCTCGATTCAATGGCAACTGTTGGTCAGTCTGC
GACGGGTTACGGTCTGAACTATCAATATGGTTTGTTCCGCCAGTCTTTTGTGGATGGCAAACAGGTTGAAGCGCCGGATG
ACTGGCATCGCAGTAACTACCCGTGGTTCCGCCACAACGAAGCACTGGATGTGCAGGTAGGGATTGGCGGTAAAGTGACG
AAAGACGGACGCTGGGAGCCGGAGTTTACCATTACCGGTCAAGCGTGGGATCTCCCCGTTGTCGGCTATCGTAATGGCGT
GGCGCAGCCGCTGCGTCTGTGGCAGGCGACGCATGCGCATCCGTTTGATCTGACTAAATTTAACGATGGTGATTTCCTGC
GTGCCGAACAGCAGGGCATCAACGCGGAAAAACTGACCAAAGTTCTCTATCCAAACGACAACCATACTGCCGGTAAAAAG
CTGCGCCTGATGCAGCAATACTTCCAGTGTGCCTGCTCGGTAGCGGATATTTTGCGTCGCCATCATCTGGCGGGGCGTAA
ACTGCACGAACTGGCGGATTATGAAGTTATTCAGCTGAACGATACCCACCCAACTATCGCGATTCCAGAACTGCTGCGCG
TGCTGATCGATGAGCACCAGATGAGCTGGGATGACGCCTGGGCCATCACCAGTAAAACTTTTGCTTACACCAACCATACC
CTGATGCCAGAAGCGCTGGAACGCTGGGATGTGAAACTGGTGAAAGGCTTACTGCCGCGCCACATGCAGATTATTAACGA
AATTAATACACGCTTTAAAACGCTGGTGGAAAAAACCTGGCCGGGCGATGAAAAAGTGTGGGCCAAACTGGCGGTGGTAC
ACGACAAACAAGTGCATATGGCGAACCTGTGTGTGGTTGGCGGTTTCGCGGTAAACGGTGTTGCGGCGCTACACTCGGAT
CTGGTAGTGAAAGATCTGTTCCCGGAATATCACCAGCTATGGCCGAACAAATTCCATAACGTCACCAACGGTATTACCCC
ACGTCGCTGGATCAAACAGTGCAACCCGGCACTGGCGGCTCTGTTGGATAAATCACTGAAAAAAGAGTGGGCTAACGATC
TCGATCAACTGATCAATCTGGAAAAATTCGCTGATGATGCGAAATTCCGTCAGCAATATCGCGAGATCAAGCAGGCGAAT
AAAGTCCGTCTGGCAGAGTTTGTGAAAGTTCGTACCGGTATTGAGATCAATCCACAGGCGATTTTCGATATTCAGATCAA
ACGTCTGCATGAGTACAAACGCCAGCACCTGAATCTGCTGCATATTCTGGCGTTGTACAAAGAAATTCGTGAAAACCCGC
AGGCTGATCGCGTACCGCGCGTCTTCCTCTTTGGCGCGAAAGCGGCACCGGGCTACTACCTGGCGAAAAACATTATCTTT
GCGATCAACAAAGTGGCTGACGTGATCAACAACGATCCGCAGGTTGGCGACAAATTGAAGGTGGTGTTCCTGCCGGATTA
TTGCGTTTCGGCGGCGGAAAAACTGATCCCGGCGGCGGATATCTCCGAACAAATTTCGACGGCAGGTAAAGAAGCTTCCG
GTACCGGCAATATGAAACTGGCGCTCAGTGGTGCGCTTACTGTCGGTACGCTGGATGGTGCGAACGTTGAAATCGCCGAG
AAAGTTGGTGAAGAAAATATCTTTATTTTTGGTCATACCGTGGAACAAGTGAAGGCAATTCTGGCCAAAGGCTACGACCC
GGTGAAATGGCGGAAGAAAGATAAGGTGCTGGACGCAGTATTGAAAGAGCTGGAAAGCGGCAAATACAGCGACGGCGATA
AGCATGCCTTCGACCAGATGCTGCACAGTATCGGCAAACAGGGCGGCGATCCGTATCTGGTGATGGCGGATTTCGCAGCC
TATGTAGAGGCACAAAAGCAGGTGGATGTGCTGTACCGCGACCAGGAGGCCTGGACTCGCGCGGCGATCCTCAATACCGC
CCGCTGCGGTATGTTTAGCTCGGATCGCTCTATTCGCGATTATCAGGCTCGTATCTGGCAGGCAAAACGCTAAGGAAGCT
CGATGGAAAGCAAACGTCTGGATAATGCCGCGCTGGCGGCGGGGATTAGCCCCAATTACATCAATGCCCACGGTAAACCG
CAGTCGATTAGCGCCGAAACCAAACGGCGTTTGCTTGACGCGATGCATCAACGTACCGCCACGAAAGTGGCGGTAACACC
AGTCCCGAATGTCATGGTTTATACCAGCGGCAAAAAAATGCCGATGGTGGTGGAGGGCAGCGGCGAATATAGCTGGCTGC
TGACCACCGAAGAAGGAACGCAGTACAAAGGCCATGTAACGGGGGGCAAAGCGTTCAATCTACCGACGAAGCTGCCGGAA
GGTTATCACACGCTGATACTCACCCAGGACGACCAGCGCGCGCATTGCCGGGTGATTGTCGCCCCGAAACGCTGTTACGA
ACCGCAGGCGTTGCTGAACAAACAAAAGCTGTGGGGTGCCTGCGTTCAGCTTTATACGCTGCGATCGGAAAAAAACTGGG
GTATTGGGGATTTTGGCGATCTCAAAGCGATGCTGGTGGATGTGGCAAAACGTGGCGGGTCGTTCATCGGTCTGAACCCG
ATTCATGCGCTCTATCCGGCAAATCCGGAAAGTGCCAGCCCGTATAGCCCGTCTTCTCGCCGTTGGCTGAATGTGATTTA
TATCGACGTTAACGCCGTTGAAGATTTCCATCTTAGCGAAGAGGCTCTGGCCTGGTGGAAGTTGCCGACCACGCAACAGA
CGCTGCAACAGGCGCGGGATGCCGACTGGGTTGATTACTCCACGGTTACCACCCTAAAAATGACAGCATTACGAATGGCG
TGGAAAGGTTTCGCGCAACGTGATGATGAGCAGATGACCGCGTTTCGCCAGTTTGTTGCAGAGCAGGGCGACAGCCTGTT
CTGGCAGGCAGCCTTTGATGCGCTACATGCCCAGCAAGTGAAAGAGGACGAAATGCGCTGGGGCTGGCCAGCATGGCCAG
AGATGTATCAGAACGTGGATTCACCAGAAGTGCGCCAGTTCTGCGAAGAACATCGTGATGACGTCGATTTTTATCTCTGG
TTGCAGTGGCTGGCTTACAGCCAGTTTGCCGCCTGCTGGGAGATAAGCCAGGGCTATGAAATGCCGATTGGCTTGTATCG
TGATCTGGCCGTTGGTGTAGCAGAAGGTGGGGCAGAAACCTGGTGCGACCGTGAACTGTATTGCCTGAAAGCGTCGGTTG
GCGCGCCGCCGGATATCCTCGGCCCGTTGGGGCAGAACTGGGGATTGCCGCCAATGGACCCGCATATCATCACCGCGCGT
GCCTATGAACCGTTTATCGAGCTGTTGCGTGCCAATATGCAAAACTGCGGCGCATTACGAATTGATCACGTGATGTCGAT
GCTGCGTTTGTGGTGGATACCGTATGGCGAGACGGCAGATCAGGGCGCGTATGTTCACTATCCGGTAGATGATCTGCTCT
CGATTCTGGCACTCGAAAGTAAGCGCCATCGCTGCATGGTGATTGGTGAAGACCTCGGCACTGTACCGGTAGAGATTGTC
GGTAAACTGCGCAGCAGCGGTGTGTACTCCTACAAAGTGCTCTATTTCGAAAGCGACCACGAGAAGACATTCCGCGCGCC
GAAAGCGTATCCGGAGCAGTCGATGGCGGTTGCGGCGACACACGACCTGCCTACACTGCGTGGCTACTGGGAGAGCGGGG
ATTTAACACTGGGTAAAACGCTGGGGCTGTACCCGGATGAAGTGGTATTGCGCGGTCTGTATCAGGATCGCGAACTGGCG
AAGCAAGGGTTGCTGGATGCACTGCATAAACATGGTTGCCTGCCAAAACGTGCGGGGCATAAGGCATCGTTAATGTCGAT
GACGCCGATGCTTAATCGTGGTTTGCAACGTTATATCGCTGATAGTAACAGTGCTCTGTTAGGGCTTCAGCCAGAAGACT
GGCTGGATATGGCCGAACCGGTAAATATTCCTGGCACCAGCTACCAGTACAAAAACTGGCGACGCAAGCTTTCCGCAACG
CTTGAGACGATGTTTGCCGATGATGGCGTGAACAAGTTGCTGAAGGATTTGGACAGACGGCGCAGAGCGGCAGCGAAGAA
GAAGTAGAGTGCGGTTGATGCCGGATGCGACGCTTGACGCGTCTTATCCGGCCTACTAATTAATGCCGAATCGTAGGCCG
GATAAGGCGTTCACGCCGCATCCGGCTATCAGTATTATCAAATCACCATATTCAGCAGCAGACAGCCTACCAGACCGCAC
ACCGAGATAATGGTTTCCAGCATCGACCAGGACTTGATGGTCTCGCCGATAGTCAGGTTAAAGTACTCTTTGAACAGCCA
GAAGCCCGGATCGTTCACGTGAGAGAAAATCACACTACCGGAACCAACCGCAATAACCATCAGTTCCGGGCTAACACCCG
TCGTTGCAATTAGTGGTGCCGCGATACCCCCCGCAGTGATTGCCGCAACGGTTGCGGAACCCAGCGCGATACGCAGTACG
GCGGCAATCGACCAGGCCATCAGCAGCGGAGAAATGTTGGTTTCGTGCATCATGGAAGCAATGTATTTGTCCACGCCGCT
GTCTACCAGCACCTGCTTGAACGCACCGCCACCACCGATGATCAACAGCATCATCGCGATGATTTTGATGGAAGAAACCA
GCGTGTCGTTAATCTGATCCATTGAACGACCACGGTTCAGACCAAAGGTGAACATAGCAATCAGCACGGCAATCAGCGTT
GCCATTACCGGGTCACCGAGGAACTCCGCCACCGGCAGGAAAGCGTGACCTTTCGGCAGGATCATTTCGGCAATTGCACG
CATCGCCATCAGCACAACCGGCACCAGAGAAGTCCAGACGCTGACGCCAAAGCTTGGCATCTCTTCTTCGCTGAAGGTTT
TCGCGCTGTACAGACCTTCCGGGATTGGCTTATCGATACCTTTCAGCACGCGAGCGTAAACCGGACCGGCGAGAATAACG
GTCGGGATTGCCAGAATAGTACCGTACAGCAGGGTTTTACCCATATCGGCATTGAAAATGGTGGCAATCGCAGTCGGACC
CGGATGCGGTGGCAGGAAGCCGTGGGTCACAGACAGTGCAGCCGCCATTGGTACACCAACATACAGCAGTGGAATATTCG
CGGAAGCCGCGATGGTAAACACCAGCGGCAGCATCAGCACGAAACCCACTTCATAGAACAGGGCAAAACCAACGGTAAAA
[truncated: 4,796,124 more chars]
